# Supplementary material
Source: PubMed Central journal article supplement (PMC5652298)
Supplement: NIHMS910618-supplement-Supplemental_informationn.pdf [file NIHMS910618-supplement-Supplemental_informationn.pdf]

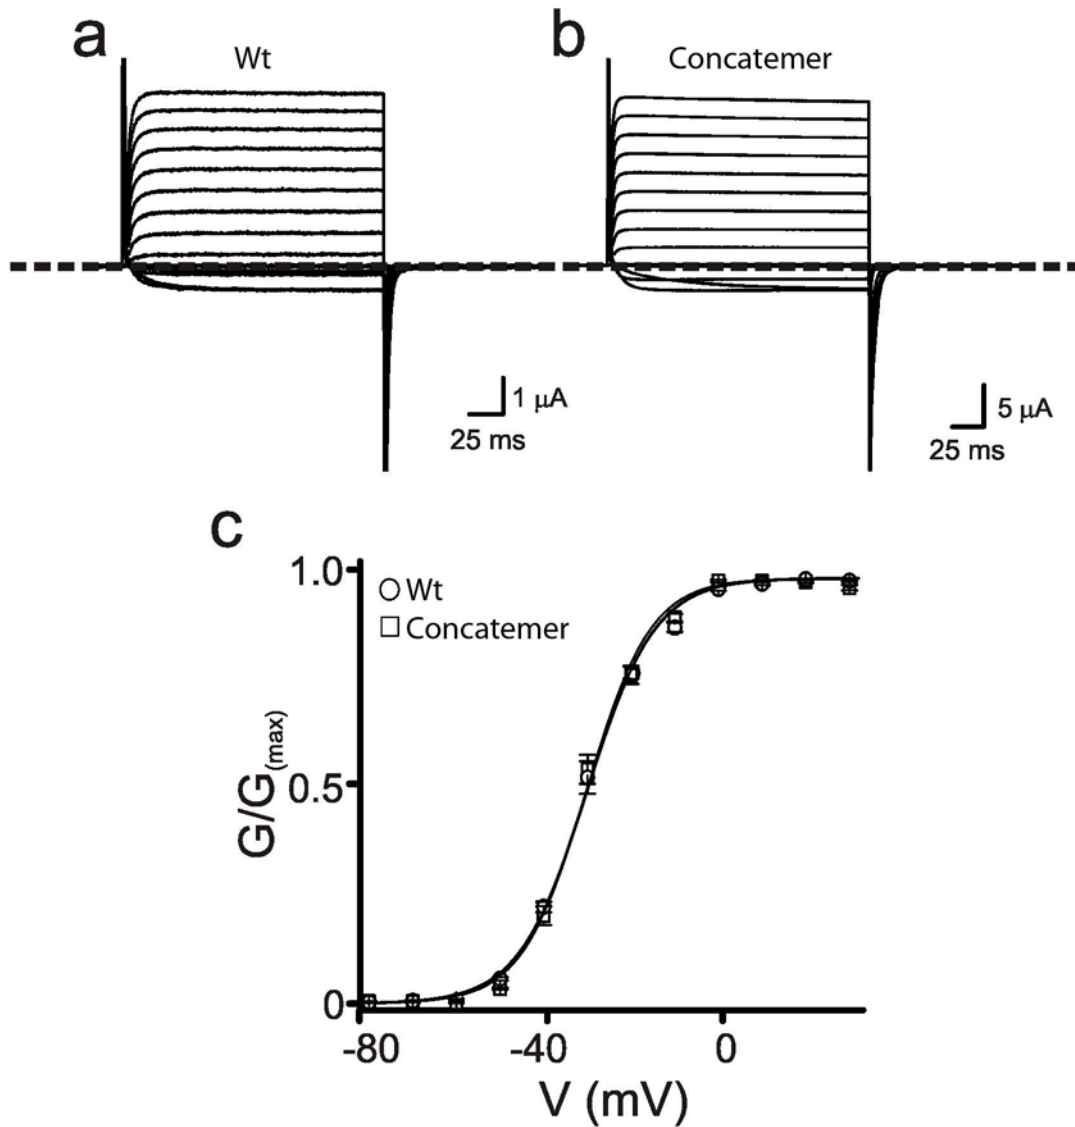

### Supplementary Figure 1

Comparison of the tetrameric Shaker channel and a concatemer construct.

**(a, b)** Currents of tetrameric **(a)** and concatemer **(b)** channels, recorded from oocytes in the presence of 100 mM extracellular  $\text{K}^+$ , as membrane voltage was stepped from the -80 mV holding potential to 80 mV in 10 mV increments and back to -80 mV. The dashed line identifies the zero current level. **(c)** Normalized tail currents (mean  $\pm$  s.e.m.;  $n = 10 - 12$ ) of tetrameric (open circles) and concatemer (open squares) channels plotted against membrane voltage; curves are fits of Boltzmann functions with midpoint voltage  $V_{1/2}$  (mean  $\pm$  s.e.m.) of  $-30 \pm 0.5$  mV and apparent valence  $Z$  of  $3.5 \pm 0.3$  for tetrameric channels or  $V_{1/2}$  of  $-30 \pm 0.6$  mV and apparent valence  $Z$  of  $3.3 \pm 0.2$  for concatemer channels.

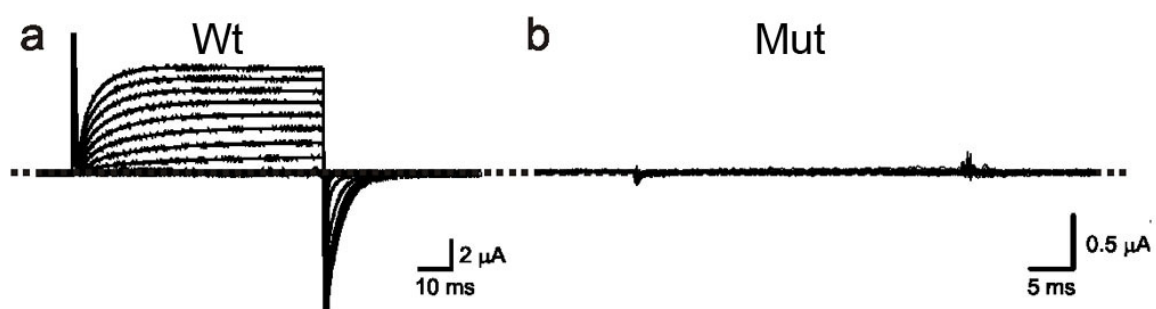

**Supplementary Figure 2**

Ionic currents of wild-type and mutant Kv1.2 channels, recorded from oocytes in the presence of 100 mM extracellular  $\text{K}^+$ .

Ionic currents of wild-type (a) and mutant Kv1.2 (b) channels, The mutation in Kv1.2 corresponds to V478W in the Shaker channel. Currents were elicited by stepping membrane voltage from the -80 mV holding potential to 80 mV in 10 mV increments and back to -80 mV. The dashed line identifies the zero current level.

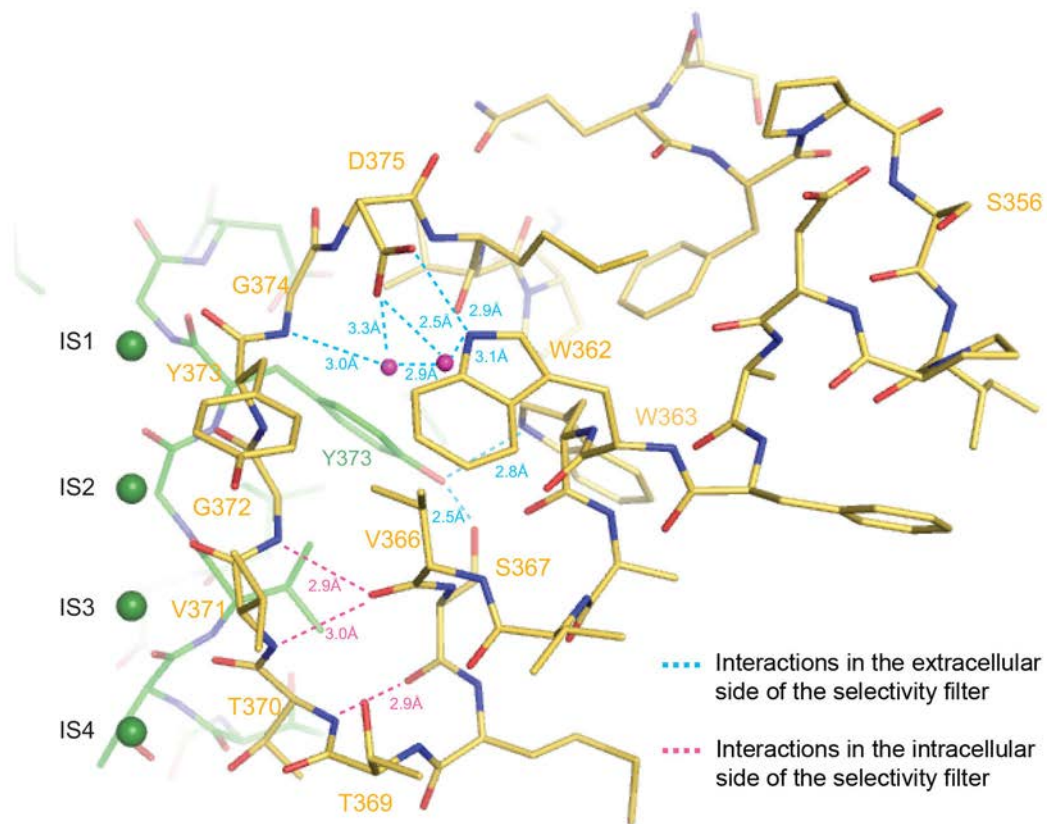

### Supplementary Figure 3

Illustration of hydrogen bonds between the selectivity filter and the pore helix of Kv1.2-2.1, as defined by distances between 2.5 and 3.3 Å.

Carbon atoms of wild-type selectivity filter of two contiguous subunits (PDB: 2R9R) are shown as green and yellow sticks, oxygen atoms in red, and nitrogen atoms in blue; K<sup>+</sup> ions and water molecules are shown as green and magenta spheres, respectively. Hydrogen bonds in the extracellular and intracellular regions are indicated by dashed blue and magenta lines, respectively.

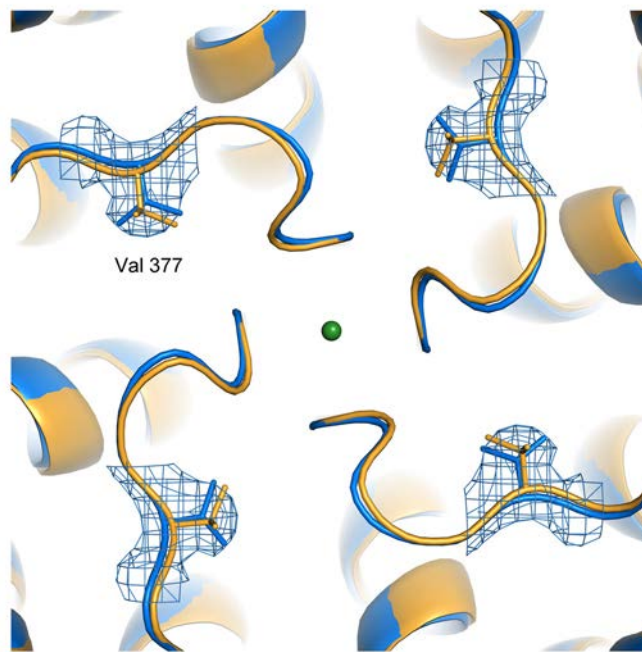

#### Supplementary Figure 4

Comparison of Val377 positions in wild-type and V406W mutant I structures.

Section of super-positioned wild-type (orange) and mutant (blue) structures around the central axis of the selectivity filter, as viewed from the outside of the cell. The part of electron density ( $2Fo-Fc$  composite-omit map contoured at  $1.5 \sigma$ ) corresponding to Val 377 is shown.

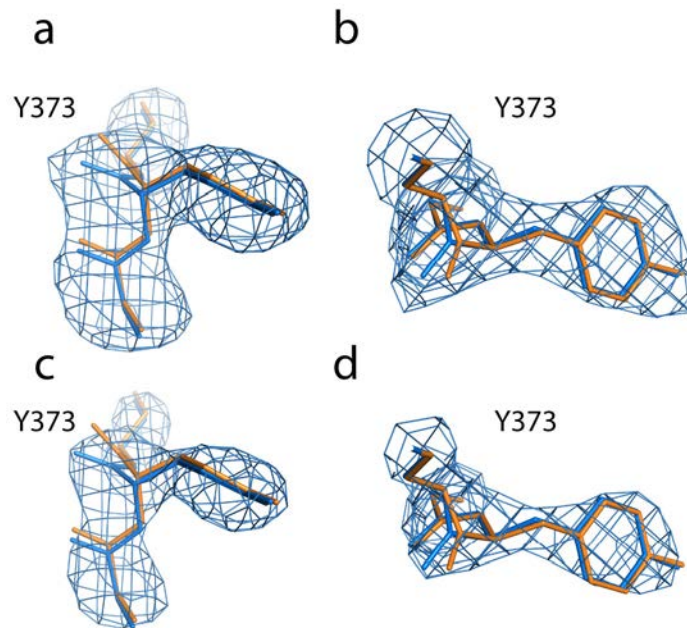

**Supplementary Figure 5**

Comparison of Tyr373 in wild-type Kv1.2-2.1 and mutant I structures.

Structures of Gly372-Tyr373-Gly374 in wild-type (orange) and mutant (blue) channels are shown in two views (**a** and **c** versus **b** and **d**). The two structures were aligned according to  $C_{\alpha}$  atoms of residues 364-372. The super-positioned *Fo-Fc* omit map of mutant molecule I, contoured at  $5 \sigma$  (**a**, **b**) and  $8 \sigma$  (**c**, **d**), was calculated with a model of the mutant molecule where Gly372-Tyr373-Gly374 were omitted.

Supplemental Table 1. Re-refinement statistics of KcsA

|                                     |                              |
|-------------------------------------|------------------------------|
| Refinement                          | 9.97 - 3.201 (3.311 - 3.201) |
| No. of reflections                  | 12169                        |
| No. of atoms                        | 2985                         |
| R <sub>work</sub> (%) <sup>**</sup> | 24.70 (36.78)                |
| R <sub>free</sub> (%) <sup>**</sup> | 25.63 (45.91)                |
| Root-mean-square-deviations         |                              |
| Bond length (Å)                     | 0.011                        |
| Angle (°)                           | 1.45                         |
| Ramachandran (%)                    |                              |
| Allowed region                      | 100                          |
| Disallowed region                   | 0                            |
| Rotamer outliers (%)                | 0                            |

Statistics for structure refinement and Ramachandran analysis are obtained from Phenix.

\*\*R factor =  $\sum |F(\text{obs}) - F(\text{calc})| / \sum F(\text{obs})$ , where part of data set excluded from refinement was the same as 1BL8 and used to calculate R<sub>free</sub>.

Parentheses indicate values for outer resolution shell.

```

REMARK      PDB of re-refined KcsA against 3.2 angstrom data from PDB 1B18
REMARK 3 REFINEMENT.
REMARK 3   PROGRAM      : PHENIX (1.10.1_2155: ???)
REMARK 3   AUTHORS      : Adams,Afonine,Bunkoczi,Burnley,Chen,Dar,Davis,
REMARK 3                   : Draizen,Echols,Gildea,Gros,Grosse-Kunstleve,Headd,
REMARK 3                   : Hintze,Hung,Ioerger,McCoy,McKee,Moriarty,Oeffner,
REMARK 3                   : Read,Richardson,Richardson,Sacchettini,Sauter,
REMARK 3                   : Sobolev,Storoni,Terwilliger,Williams,Zwart
REMARK 3
REMARK 3 REFINEMENT TARGET : ML
REMARK 3
REMARK 3 DATA USED IN REFINEMENT.
REMARK 3 RESOLUTION RANGE HIGH (ANGSTROMS) : 3.201
REMARK 3 RESOLUTION RANGE LOW  (ANGSTROMS) : 9.986
REMARK 3 MIN(FOBS/SIGMA_FOBS)          : 1.37
REMARK 3 COMPLETENESS FOR RANGE          (%) : 93.33
REMARK 3 NUMBER OF REFLECTIONS          : 12170
REMARK 3 NUMBER OF REFLECTIONS (NON-ANOMALOUS) : 12170
REMARK 3
REMARK 3 FIT TO DATA USED IN REFINEMENT.
REMARK 3 R VALUE      (WORKING + TEST SET) : 0.2480
REMARK 3 R VALUE      (WORKING SET)       : 0.2469
REMARK 3 FREE R VALUE          : 0.2564
REMARK 3 FREE R VALUE TEST SET SIZE (%)  : 10.39
REMARK 3 FREE R VALUE TEST SET COUNT    : 1264
REMARK 3
REMARK 3 FIT TO DATA USED IN REFINEMENT (IN BINS).
REMARK 3 BIN RESOLUTION RANGE COMPL.  NWORK NFREE  RWORK  RFREE  CCWORK
CCFREE
REMARK 3   1 9.9863 - 6.1592      0.99   1321   141  0.2031 0.2030  0.930
0.872
REMARK 3   2 6.1592 - 5.0962      1.00   1303   141  0.2561 0.2405  0.857
0.847
REMARK 3   3 5.0962 - 4.5197      0.99   1305   140  0.2214 0.2329  0.905
0.893
REMARK 3   4 4.5197 - 4.1386      0.97   1282   141  0.2288 0.2580  0.867
0.788
REMARK 3   5 4.1386 - 3.8604      1.00   1260   154  0.2580 0.2437  0.838
0.855
REMARK 3   6 3.8604 - 3.6445      1.00   1262   176  0.2862 0.3067  0.842
0.795
REMARK 3   7 3.6445 - 3.4700      0.99   1250   173  0.3109 0.3892  0.761
0.654
REMARK 3   8 3.4700 - 3.3247      0.80   1063    96  0.3345 0.3983  0.711
0.510
REMARK 3   9 3.3247 - 3.2011      0.67    860   102  0.3577 0.4591  0.667
0.350
REMARK 3
REMARK 3 BULK SOLVENT MODELLING.
REMARK 3 METHOD USED      : FLAT BULK SOLVENT MODEL
REMARK 3 SOLVENT RADIUS  : 1.11
REMARK 3 SHRINKAGE RADIUS : 0.90
REMARK 3 GRID STEP FACTOR : 4.00
REMARK 3
REMARK 3 ERROR ESTIMATES.
REMARK 3 COORDINATE ERROR (MAXIMUM-LIKELIHOOD BASED) : 0.52
REMARK 3 PHASE ERROR (DEGREES, MAXIMUM-LIKELIHOOD BASED) : 35.07
REMARK 3
REMARK 3 STRUCTURE FACTORS CALCULATION ALGORITHM : FFT
REMARK 3
REMARK 3 RESTRAINTS LIBRARY
REMARK 3 GEOSTD + MON.LIB. + CDL v1.2
REMARK 3

```

```

REMARK 3 DEVIATIONS FROM IDEAL VALUES.
REMARK 3           RMSD      MAX  COUNT
REMARK 3 BOND       :  0.011   0.086  3042
REMARK 3 ANGLE      :  1.448  10.820  4195
REMARK 3 CHIRALITY  :  0.084   0.401   520
REMARK 3 PLANARITY  :  0.008   0.081   502
REMARK 3 DIHEDRAL   : 14.929 157.014  955
REMARK 3 MIN NONBONDED DISTANCE : 1.812
REMARK 3
REMARK 3 MOLPROBITY STATISTICS.
REMARK 3 ALL-ATOM CLASHSCORE : 9.07
REMARK 3 RAMACHANDRAN PLOT:
REMARK 3   OUTLIERS : 0.00 %
REMARK 3   ALLOWED  : 0.25 %
REMARK 3   FAVORED  : 99.75 %
REMARK 3 ROTAMER OUTLIERS : 0.00 %
REMARK 3 CBETA DEVIATIONS : 0
REMARK 3
REMARK 3 ATOMIC DISPLACEMENT PARAMETERS.
REMARK 3 WILSON B : 102.29
REMARK 3 RMS(B_ISO_OR_EQUIVALENT_BONDED) : 5.85
REMARK 3 ATOMS           NUMBER OF ATOMS
REMARK 3                   ISO.  ANISO.
REMARK 3 ALL              : 2985   2967
REMARK 3 ALL (NO H)      : 2985   2967
REMARK 3 SOLVENT         : 12     0
REMARK 3 NON-SOLVENT    : 2973   2967
REMARK 3 HYDROGENS      : 0      0
REMARK 3
REMARK 3 TLS DETAILS.
REMARK 3 NUMBER OF TLS GROUPS: 16
REMARK 3 ORIGIN: CENTER OF MASS
REMARK 3 TLS GROUP : 1
REMARK 3 SELECTION: chain 'C' and (resid 22 through 61 )
REMARK 3 ORIGIN FOR THE GROUP (A): 55.3222 28.4061 25.1709
REMARK 3 T TENSOR
REMARK 3 T11: 0.7251 T22: 1.3799
REMARK 3 T33: 0.8123 T12: 0.1395
REMARK 3 T13: 0.1614 T23: -0.0248
REMARK 3 L TENSOR
REMARK 3 L11: 0.1015 L22: 0.4043
REMARK 3 L33: 0.0824 L12: 0.1233
REMARK 3 L13: -0.1590 L23: 0.1773
REMARK 3 S TENSOR
REMARK 3 S11: -0.0999 S12: -0.4311 S13: -0.4068
REMARK 3 S21: 0.1728 S22: -0.1706 S23: 0.4448
REMARK 3 S31: -0.1471 S32: -0.6221 S33: 0.0000
REMARK 3 TLS GROUP : 2
REMARK 3 SELECTION: chain 'C' and (resid 62 through 73 )
REMARK 3 ORIGIN FOR THE GROUP (A): 55.8507 24.8806 16.7873
REMARK 3 T TENSOR
REMARK 3 T11: 0.7112 T22: 0.9261
REMARK 3 T33: 0.8274 T12: -0.0298
REMARK 3 T13: 0.1187 T23: 0.0241
REMARK 3 L TENSOR
REMARK 3 L11: 0.0076 L22: 0.0112
REMARK 3 L33: 0.0476 L12: 0.0787
REMARK 3 L13: 0.0284 L23: -0.0755
REMARK 3 S TENSOR
REMARK 3 S11: 0.1154 S12: -0.1573 S13: -0.0599
REMARK 3 S21: 0.3203 S22: -0.2524 S23: -0.0383
REMARK 3 S31: -0.2512 S32: -1.0487 S33: -0.0000
REMARK 3 TLS GROUP : 3

```



```

REMARK 3 SELECTION: chain 'C' and (resid 74 through 87 )
REMARK 3 ORIGIN FOR THE GROUP (A): 60.2431 31.1268 13.3600
REMARK 3 T TENSOR
REMARK 3 T11: 0.8798 T22: 0.6250
REMARK 3 T33: 0.9041 T12: 0.0748
REMARK 3 T13: -0.1156 T23: -0.1110
REMARK 3 L TENSOR
REMARK 3 L11: 0.0137 L22: -0.0104
REMARK 3 L33: -0.0610 L12: -0.0177
REMARK 3 L13: 0.0334 L23: -0.0269
REMARK 3 S TENSOR
REMARK 3 S11: 0.0145 S12: -0.0607 S13: -0.0490
REMARK 3 S21: -0.1350 S22: -0.2604 S23: -0.4682
REMARK 3 S31: -0.6131 S32: -0.6743 S33: -0.0000
REMARK 3 TLS GROUP : 4
REMARK 3 SELECTION: chain 'C' and (resid 88 through 122 )
REMARK 3 ORIGIN FOR THE GROUP (A): 70.8589 25.6143 33.7053
REMARK 3 T TENSOR
REMARK 3 T11: 0.8096 T22: 0.8925
REMARK 3 T33: 0.5894 T12: 0.0258
REMARK 3 T13: -0.0031 T23: 0.0137
REMARK 3 L TENSOR
REMARK 3 L11: 0.0989 L22: 0.5790
REMARK 3 L33: 0.3585 L12: 0.3999
REMARK 3 L13: 0.0393 L23: 0.6513
REMARK 3 S TENSOR
REMARK 3 S11: -0.0913 S12: -0.4301 S13: 0.2615
REMARK 3 S21: 0.7286 S22: -0.1817 S23: -0.0016
REMARK 3 S31: -0.5909 S32: -0.1597 S33: 0.0000
REMARK 3 TLS GROUP : 5
REMARK 3 SELECTION: chain 'B' and (resid 22 through 61 )
REMARK 3 ORIGIN FOR THE GROUP (A): 73.5828 44.2112 17.5302
REMARK 3 T TENSOR
REMARK 3 T11: 1.4952 T22: -0.3590
REMARK 3 T33: 0.8742 T12: -0.4244
REMARK 3 T13: -0.4471 T23: -0.4010
REMARK 3 L TENSOR
REMARK 3 L11: -0.0503 L22: -0.0712
REMARK 3 L33: 0.0251 L12: 0.1793
REMARK 3 L13: -0.1086 L23: -0.0713
REMARK 3 S TENSOR
REMARK 3 S11: 0.2635 S12: 1.8073 S13: 2.1370
REMARK 3 S21: -0.0258 S22: -0.5034 S23: -0.6945
REMARK 3 S31: -0.0411 S32: 0.0386 S33: 0.0000
REMARK 3 TLS GROUP : 6
REMARK 3 SELECTION: chain 'B' and (resid 62 through 73 )
REMARK 3 ORIGIN FOR THE GROUP (A): 67.4269 40.4189 12.1617
REMARK 3 T TENSOR
REMARK 3 T11: 1.0671 T22: 0.6264
REMARK 3 T33: 1.0642 T12: 0.0383
REMARK 3 T13: -0.0312 T23: -0.0643
REMARK 3 L TENSOR
REMARK 3 L11: 0.0280 L22: -0.0276
REMARK 3 L33: 0.0277 L12: -0.0782
REMARK 3 L13: 0.0391 L23: 0.0121
REMARK 3 S TENSOR
REMARK 3 S11: -0.4418 S12: -0.2871 S13: 0.6554
REMARK 3 S21: -0.2459 S22: 0.3272 S23: -0.0903
REMARK 3 S31: -0.5435 S32: 0.0946 S33: 0.0000
REMARK 3 TLS GROUP : 7
REMARK 3 SELECTION: chain 'B' and (resid 74 through 87 )
REMARK 3 ORIGIN FOR THE GROUP (A): 72.7960 35.1351 8.4253
REMARK 3 T TENSOR

```

```

REMARK 3      T11:  0.7354 T22:  0.7060
REMARK 3      T33:  0.6916 T12: -0.2553
REMARK 3      T13:  0.0458 T23:  0.1317
REMARK 3      L TENSOR
REMARK 3      L11:  0.0065 L22: -0.0428
REMARK 3      L33:  0.0447 L12:  0.0225
REMARK 3      L13:  0.1039 L23: -0.1272
REMARK 3      S TENSOR
REMARK 3      S11: -0.4429 S12: -0.1789 S13: -0.2110
REMARK 3      S21:  0.0094 S22: -0.0015 S23: -0.1251
REMARK 3      S31: -1.0793 S32:  0.2545 S33: -0.0000
REMARK 3      TLS GROUP : 8
REMARK 3      SELECTION: chain 'D' and (resid  22 through  61 )
REMARK 3      ORIGIN FOR THE GROUP (A):  88.0550  24.6149  12.2850
REMARK 3      T TENSOR
REMARK 3      T11:  0.2461 T22:  1.6998
REMARK 3      T33:  0.8444 T12: -0.1965
REMARK 3      T13:  0.0750 T23:  0.1144
REMARK 3      L TENSOR
REMARK 3      L11:  0.1603 L22:  0.0641
REMARK 3      L33: -0.0636 L12: -0.4313
REMARK 3      L13:  0.1782 L23:  0.1829
REMARK 3      S TENSOR
REMARK 3      S11:  0.6294 S12:  0.1147 S13:  0.3720
REMARK 3      S21: -1.2228 S22: -1.3443 S23: -0.4183
REMARK 3      S31:  0.2671 S32:  0.5484 S33:  0.0000
REMARK 3      TLS GROUP : 9
REMARK 3      SELECTION: chain 'D' and (resid  62 through  73 )
REMARK 3      ORIGIN FOR THE GROUP (A):  82.0363  28.1833  6.5590
REMARK 3      T TENSOR
REMARK 3      T11:  0.6148 T22:  0.8851
REMARK 3      T33:  0.8539 T12: -0.1898
REMARK 3      T13:  0.0610 T23:  0.1133
REMARK 3      L TENSOR
REMARK 3      L11: -0.0099 L22:  0.0733
REMARK 3      L33:  0.0629 L12:  0.0336
REMARK 3      L13:  0.0887 L23: -0.0144
REMARK 3      S TENSOR
REMARK 3      S11:  0.2391 S12:  0.5723 S13: -0.0616
REMARK 3      S21:  0.2196 S22: -0.2567 S23:  0.0478
REMARK 3      S31:  0.3024 S32:  0.9466 S33:  0.0000
REMARK 3      TLS GROUP : 10
REMARK 3      SELECTION: chain 'D' and (resid  74 through  87 )
REMARK 3      ORIGIN FOR THE GROUP (A):  76.5107  21.8383  6.9020
REMARK 3      T TENSOR
REMARK 3      T11:  0.8064 T22:  0.5891
REMARK 3      T33:  0.7861 T12:  0.0055
REMARK 3      T13:  0.0292 T23:  0.0067
REMARK 3      L TENSOR
REMARK 3      L11:  0.0812 L22:  0.0590
REMARK 3      L33:  0.0391 L12:  0.1990
REMARK 3      L13: -0.0918 L23: -0.0687
REMARK 3      S TENSOR
REMARK 3      S11: -0.2009 S12:  0.3335 S13: -0.2406
REMARK 3      S21: -0.0769 S22: -0.1698 S23: -0.4175
REMARK 3      S31: -0.3679 S32:  0.4977 S33: -0.0000
REMARK 3      TLS GROUP : 11
REMARK 3      SELECTION: chain 'D' and (resid  88 through 122 )
REMARK 3      ORIGIN FOR THE GROUP (A):  82.5410  26.7742  28.3371
REMARK 3      T TENSOR
REMARK 3      T11:  0.6234 T22:  0.7898
REMARK 3      T33:  0.5807 T12: -0.0450
REMARK 3      T13: -0.0966 T23:  0.0053

```

```

REMARK 3 L TENSOR
REMARK 3 L11: 0.1300 L22: 0.3380
REMARK 3 L33: 0.1239 L12: -0.1666
REMARK 3 L13: 0.0910 L23: -0.3731
REMARK 3 S TENSOR
REMARK 3 S11: -0.1106 S12: -0.2913 S13: -0.3196
REMARK 3 S21: 0.4349 S22: -0.2349 S23: -0.0563
REMARK 3 S31: 0.3616 S32: 0.7183 S33: -0.0000
REMARK 3 TLS GROUP : 12
REMARK 3 SELECTION: chain 'E' and (resid 22 through 61 )
REMARK 3 ORIGIN FOR THE GROUP (A): 69.7418 8.9431 18.9990
REMARK 3 T TENSOR
REMARK 3 T11: 1.1832 T22: 0.7927
REMARK 3 T33: 0.8028 T12: -0.2319
REMARK 3 T13: -0.1984 T23: 0.2158
REMARK 3 L TENSOR
REMARK 3 L11: 0.1848 L22: 0.1950
REMARK 3 L33: 0.0764 L12: -0.1402
REMARK 3 L13: -0.2311 L23: 0.1243
REMARK 3 S TENSOR
REMARK 3 S11: 0.2992 S12: 0.0172 S13: -0.1520
REMARK 3 S21: -0.1222 S22: -0.2054 S23: 0.0314
REMARK 3 S31: 0.9841 S32: 0.2715 S33: 0.0000
REMARK 3 TLS GROUP : 13
REMARK 3 SELECTION: chain 'E' and (resid 62 through 73 )
REMARK 3 ORIGIN FOR THE GROUP (A): 70.3907 12.5331 11.1227
REMARK 3 T TENSOR
REMARK 3 T11: 1.0361 T22: 0.4538
REMARK 3 T33: 0.9133 T12: 0.0240
REMARK 3 T13: -0.1110 T23: 0.1211
REMARK 3 L TENSOR
REMARK 3 L11: 0.0370 L22: -0.0123
REMARK 3 L33: 0.0863 L12: -0.0593
REMARK 3 L13: -0.0088 L23: 0.0112
REMARK 3 S TENSOR
REMARK 3 S11: 0.3888 S12: 0.3021 S13: -0.0894
REMARK 3 S21: -0.0579 S22: 0.3186 S23: 0.3895
REMARK 3 S31: 1.0528 S32: 0.0516 S33: 0.0000
REMARK 3 TLS GROUP : 14
REMARK 3 SELECTION: chain 'E' and (resid 74 through 85 )
REMARK 3 ORIGIN FOR THE GROUP (A): 66.3791 19.3866 10.7278
REMARK 3 T TENSOR
REMARK 3 T11: 0.5678 T22: 1.1042
REMARK 3 T33: 0.6448 T12: -0.2473
REMARK 3 T13: 0.1249 T23: -0.0149
REMARK 3 L TENSOR
REMARK 3 L11: 0.0046 L22: -0.0008
REMARK 3 L33: -0.0488 L12: -0.0063
REMARK 3 L13: -0.0122 L23: 0.0485
REMARK 3 S TENSOR
REMARK 3 S11: -0.0902 S12: 0.3684 S13: 0.0997
REMARK 3 S21: 0.0349 S22: -0.0892 S23: 0.1046
REMARK 3 S31: 0.0318 S32: -0.0662 S33: 0.0000
REMARK 3 TLS GROUP : 15
REMARK 3 SELECTION: chain 'E' and (resid 86 through 122 )
REMARK 3 ORIGIN FOR THE GROUP (A): 75.7420 19.6197 30.0097
REMARK 3 T TENSOR
REMARK 3 T11: 0.7497 T22: 0.9444
REMARK 3 T33: 0.6931 T12: -0.2296
REMARK 3 T13: -0.1583 T23: 0.1295
REMARK 3 L TENSOR
REMARK 3 L11: 0.0255 L22: 0.4388
REMARK 3 L33: 0.4565 L12: 0.2876

```

```

REMARK 3      L13:  -0.2722 L23:  -0.5836
REMARK 3      S TENSOR
REMARK 3      S11:   0.0484 S12:  -0.7261 S13:  -0.6454
REMARK 3      S21:   0.1256 S22:   0.0976 S23:   0.0240
REMARK 3      S31:   0.1697 S32:  -0.2066 S33:  -0.0000
REMARK 3      TLS GROUP : 16
REMARK 3      SELECTION: chain 'B' and (resid 88 through 122)
REMARK 3      ORIGIN FOR THE GROUP (A):  76.1175  33.1040  30.8525
REMARK 3      T TENSOR
REMARK 3      T11:   0.8594 T22:   0.7645
REMARK 3      T33:   0.5409 T12:  -0.1939
REMARK 3      T13:   0.0048 T23:  -0.0093
REMARK 3      L TENSOR
REMARK 3      L11:   0.2656 L22:   0.1532
REMARK 3      L33:   0.1013 L12:   0.1492
REMARK 3      L13:   0.3415 L23:   0.1532
REMARK 3      S TENSOR
REMARK 3      S11:  -0.1374 S12:  -0.2984 S13:   0.2428
REMARK 3      S21:   0.0243 S22:  -0.0828 S23:  -0.0338
REMARK 3      S31:   0.0257 S32:   0.4600 S33:  -0.0000
REMARK 3
CRYST1 128.780  68.930 112.040  90.00 124.63  90.00 C 1 2 1
SCALE1  0.007765  0.000000  0.005363  0.000000
SCALE2  0.000000  0.014507  0.000000  0.000000
SCALE3  0.000000  0.000000  0.010847  0.000000
ATOM 1 N SER C 22 65.055 19.287 49.655 1.00171.67 N
ANISOU 1 N SER C 22 19941 26491 18796 -114 3426 3076 N
ATOM 2 CA SER C 22 65.410 19.714 48.304 1.00166.69 C
ANISOU 2 CA SER C 22 19338 25749 18248 -49 3294 2963 C
ATOM 3 CB SER C 22 64.216 19.554 47.361 1.00162.13 C
ANISOU 3 CB SER C 22 18599 25196 17805 -32 3319 2809 C
ATOM 4 C SER C 22 65.945 21.148 48.272 1.00159.92 C
ANISOU 4 C SER C 22 18630 24906 17224 81 3175 2877 C
ATOM 5 O SER C 22 65.275 22.084 48.703 1.00156.93 O
ANISOU 5 O SER C 22 18255 24658 16712 169 3191 2776 O
ATOM 6 N ALA C 23 67.160 21.300 47.756 1.00149.72 N
ANISOU 6 N ALA C 23 17463 23479 15945 92 3059 2917 N
ATOM 7 CA ALA C 23 67.815 22.599 47.671 1.00148.11 C
ANISOU 7 CA ALA C 23 17412 23269 15594 209 2941 2845 C
ATOM 8 CB ALA C 23 69.315 22.433 47.522 1.00146.85 C
ANISOU 8 CB ALA C 23 17391 22961 15443 178 2850 2959 C
ATOM 9 C ALA C 23 67.261 23.469 46.562 1.00150.11 C
ANISOU 9 C ALA C 23 17644 23522 15869 320 2860 2642 C
ATOM 10 O ALA C 23 66.699 22.978 45.602 1.00158.21 O
ANISOU 10 O ALA C 23 18558 24502 17054 299 2861 2569 O
ATOM 11 N LEU C 24 67.442 24.772 46.706 1.00146.04 N
ANISOU 11 N LEU C 24 17239 23057 15191 439 2787 2552 N
ATOM 12 CA LEU C 24 66.914 25.769 45.774 1.00144.11 C
ANISOU 12 CA LEU C 24 16991 22828 14937 560 2707 2355 C
ATOM 13 CB LEU C 24 67.580 27.128 46.017 1.00134.78 C
ANISOU 13 CB LEU C 24 15977 21664 13568 675 2613 2303 C
ATOM 14 CG LEU C 24 67.140 28.318 45.152 1.00131.20 C
ANISOU 14 CG LEU C 24 15547 21228 13074 814 2523 2102 C
ATOM 15 CD1 LEU C 24 65.710 28.757 45.437 1.00137.14 C
ANISOU 15 CD1 LEU C 24 16182 22143 13782 871 2597 1981 C
ATOM 16 CD2 LEU C 24 68.108 29.488 45.281 1.00129.54 C
ANISOU 16 CD2 LEU C 24 15523 20992 12703 909 2420 2078 C
ATOM 17 C LEU C 24 67.080 25.387 44.301 1.00145.19 C
ANISOU 17 C LEU C 24 17093 22818 15253 550 2626 2288 C
ATOM 18 O LEU C 24 66.104 25.453 43.543 1.00145.88 O
ANISOU 18 O LEU C 24 17070 22934 15424 585 2629 2153 O
ATOM 19 N HIS C 25 68.255 24.926 43.921 1.00143.15 N
ANISOU 19 N HIS C 25 16920 22408 15062 495 2563 2384 N

```

|        |    |     |     |   |    |        |        |        |            |      |      |   |
|--------|----|-----|-----|---|----|--------|--------|--------|------------|------|------|---|
| ATOM   | 20 | CA  | HIS | C | 25 | 68.447 | 24.615 | 42.532 | 1.00138.62 | C    |      |   |
| ANISOU | 20 | CA  | HIS | C | 25 | 16324  | 21693  | 14651  | 486        | 2486 | 2318 | C |
| ATOM   | 21 | CB  | HIS | C | 25 | 69.890 | 24.190 | 42.258 | 1.00130.73 | C    |      |   |
| ANISOU | 21 | CB  | HIS | C | 25 | 15441  | 20525  | 13706  | 427        | 2416 | 2435 | C |
| ATOM   | 22 | CG  | HIS | C | 25 | 70.464 | 23.250 | 43.267 | 1.00132.93 | C    |      |   |
| ANISOU | 22 | CG  | HIS | C | 25 | 15725  | 20794  | 13989  | 312        | 2494 | 2636 | C |
| ATOM   | 23 | ND1 | HIS | C | 25 | 71.278 | 23.670 | 44.290 | 1.00130.57 | N    |      |   |
| ANISOU | 23 | ND1 | HIS | C | 25 | 15554  | 20523  | 13534  | 325        | 2484 | 2736 | N |
| ATOM   | 24 | CE1 | HIS | C | 25 | 71.654 | 22.628 | 45.004 | 1.00133.92 | C    |      |   |
| ANISOU | 24 | CE1 | HIS | C | 25 | 15954  | 20926  | 14003  | 210        | 2558 | 2911 | C |
| ATOM   | 25 | NE2 | HIS | C | 25 | 71.127 | 21.546 | 44.469 | 1.00128.98 | N    |      |   |
| ANISOU | 25 | NE2 | HIS | C | 25 | 15189  | 20257  | 13559  | 122        | 2618 | 2928 | N |
| ATOM   | 26 | CD2 | HIS | C | 25 | 70.382 | 21.907 | 43.378 | 1.00132.17 | C    |      |   |
| ANISOU | 26 | CD2 | HIS | C | 25 | 15526  | 20657  | 14037  | 183        | 2579 | 2758 | C |
| ATOM   | 27 | C   | HIS | C | 25 | 67.479 | 23.584 | 42.016 | 1.00137.16 | C    |      |   |
| ANISOU | 27 | C   | HIS | C | 25 | 15957  | 21512  | 14647  | 409        | 2564 | 2298 | C |
| ATOM   | 28 | O   | HIS | C | 25 | 66.888 | 23.791 | 40.972 | 1.00140.14 | O    |      |   |
| ANISOU | 28 | O   | HIS | C | 25 | 16272  | 21867  | 15107  | 455        | 2519 | 2157 | O |
| ATOM   | 29 | N   | TRP | C | 26 | 67.265 | 22.507 | 42.745 | 1.00134.05 | N    |      |   |
| ANISOU | 29 | N   | TRP | C | 26 | 15474  | 21150  | 14310  | 296        | 2681 | 2431 | N |
| ATOM   | 30 | CA  | TRP | C | 26 | 66.338 | 21.499 | 42.280 | 1.00137.37 | C    |      |   |
| ANISOU | 30 | CA  | TRP | C | 26 | 15718  | 21574  | 14903  | 219        | 2762 | 2413 | C |
| ATOM   | 31 | CB  | TRP | C | 26 | 66.382 | 20.264 | 43.154 | 1.00141.59 | C    |      |   |
| ANISOU | 31 | CB  | TRP | C | 26 | 16184  | 22120  | 15493  | 84         | 2887 | 2591 | C |
| ATOM   | 32 | CG  | TRP | C | 26 | 67.677 | 19.532 | 43.128 | 1.00138.60 | C    |      |   |
| ANISOU | 32 | CG  | TRP | C | 26 | 15889  | 21592  | 15180  | -4         | 2855 | 2749 | C |
| ATOM   | 33 | CD1 | TRP | C | 26 | 68.537 | 19.379 | 44.156 | 1.00144.88 | C    |      |   |
| ANISOU | 33 | CD1 | TRP | C | 26 | 16782  | 22384  | 15882  | -46        | 2875 | 2907 | C |
| ATOM   | 34 | NE1 | TRP | C | 26 | 69.610 | 18.632 | 43.770 | 1.00145.15 | N    |      |   |
| ANISOU | 34 | NE1 | TRP | C | 26 | 16865  | 22259  | 16026  | -126       | 2834 | 3021 | N |
| ATOM   | 35 | CE2 | TRP | C | 26 | 69.453 | 18.287 | 42.460 | 1.00136.89 | C    |      |   |
| ANISOU | 35 | CE2 | TRP | C | 26 | 15755  | 21110  | 15148  | -140       | 2790 | 2936 | C |
| ATOM   | 36 | CD2 | TRP | C | 26 | 68.244 | 18.835 | 42.027 | 1.00136.46 | C    |      |   |
| ANISOU | 36 | CD2 | TRP | C | 26 | 15608  | 21155  | 15086  | -64        | 2800 | 2765 | C |
| ATOM   | 37 | CE3 | TRP | C | 26 | 67.846 | 18.624 | 40.717 | 1.00143.37 | C    |      |   |
| ANISOU | 37 | CE3 | TRP | C | 26 | 16405  | 21954  | 16115  | -62        | 2759 | 2651 | C |
| ATOM   | 38 | CZ3 | TRP | C | 26 | 68.660 | 17.890 | 39.897 | 1.00147.58 | C    |      |   |
| ANISOU | 38 | CZ3 | TRP | C | 26 | 16958  | 22317  | 16800  | -137       | 2713 | 2709 | C |
| ATOM   | 39 | CH2 | TRP | C | 26 | 69.859 | 17.359 | 40.357 | 1.00140.60 | C    |      |   |
| ANISOU | 39 | CH2 | TRP | C | 26 | 16165  | 21335  | 15922  | -211       | 2706 | 2879 | C |
| ATOM   | 40 | CZ2 | TRP | C | 26 | 70.272 | 17.548 | 41.634 | 1.00134.90 | C    |      |   |
| ANISOU | 40 | CZ2 | TRP | C | 26 | 15518  | 20684  | 15052  | -213       | 2742 | 2995 | C |
| ATOM   | 41 | C   | TRP | C | 26 | 64.928 | 22.051 | 42.183 | 1.00137.56 | C    |      |   |
| ANISOU | 41 | C   | TRP | C | 26 | 15629  | 21738  | 14900  | 295        | 2801 | 2252 | C |
| ATOM   | 42 | O   | TRP | C | 26 | 64.173 | 21.670 | 41.308 | 1.00133.16 | O    |      |   |
| ANISOU | 42 | O   | TRP | C | 26 | 14949  | 21164  | 14481  | 284        | 2809 | 2160 | O |
| ATOM   | 43 | N   | ARG | C | 27 | 64.562 | 22.930 | 43.105 | 1.00140.74 | N    |      |   |
| ANISOU | 43 | N   | ARG | C | 27 | 16068  | 22280  | 15125  | 370        | 2828 | 2220 | N |
| ATOM   | 44 | CA  | ARG | C | 27 | 63.216 | 23.485 | 43.110 | 1.00141.63 | C    |      |   |
| ANISOU | 44 | CA  | ARG | C | 27 | 16075  | 22534  | 15206  | 444        | 2870 | 2070 | C |
| ATOM   | 45 | CB  | ARG | C | 27 | 62.946 | 24.203 | 44.429 | 1.00153.73 | C    |      |   |
| ANISOU | 45 | CB  | ARG | C | 27 | 17651  | 24218  | 16542  | 492        | 2931 | 2087 | C |
| ATOM   | 46 | CG  | ARG | C | 27 | 63.025 | 23.295 | 45.637 | 1.00159.19 | C    |      |   |
| ANISOU | 46 | CG  | ARG | C | 27 | 18312  | 24957  | 17217  | 378        | 3059 | 2262 | C |
| ATOM   | 47 | CD  | ARG | C | 27 | 62.593 | 24.021 | 46.893 | 1.00160.27 | C    |      |   |
| ANISOU | 47 | CD  | ARG | C | 27 | 18478  | 25254  | 17164  | 426        | 3127 | 2260 | C |
| ATOM   | 48 | NE  | ARG | C | 27 | 61.216 | 24.490 | 46.793 | 1.00169.89 | N    |      |   |
| ANISOU | 48 | NE  | ARG | C | 27 | 19575  | 26599  | 18378  | 491        | 3174 | 2102 | N |
| ATOM   | 49 | CZ  | ARG | C | 27 | 60.574 | 25.119 | 47.771 | 1.00171.02 | C    |      |   |
| ANISOU | 49 | CZ  | ARG | C | 27 | 19711  | 26892  | 18377  | 537        | 3245 | 2070 | C |
| ATOM   | 50 | NH1 | ARG | C | 27 | 61.185 | 25.350 | 48.925 | 1.00170.68 | N    |      |   |
| ANISOU | 50 | NH1 | ARG | C | 27 | 19777  | 26893  | 18179  | 522        | 3275 | 2185 | N |
| ATOM   | 51 | NH2 | ARG | C | 27 | 59.319 | 25.510 | 47.597 | 1.00172.80 | N    |      |   |

|        |    |     |     |   |    |        |        |        |            |      |      |   |
|--------|----|-----|-----|---|----|--------|--------|--------|------------|------|------|---|
| ANISOU | 51 | NH2 | ARG | C | 27 | 19818  | 27223  | 18615  | 595        | 3285 | 1921 | N |
| ATOM   | 52 | C   | ARG | C | 27 | 63.056 | 24.440 | 41.939 | 1.00137.60 |      |      | C |
| ANISOU | 52 | C   | ARG | C | 27 | 15595  | 21985  | 14701  | 563        | 2746 | 1888 | C |
| ATOM   | 53 | O   | ARG | C | 27 | 62.048 | 24.414 | 41.230 | 1.00142.41 |      |      | O |
| ANISOU | 53 | O   | ARG | C | 27 | 16081  | 22626  | 15401  | 590        | 2752 | 1760 | O |
| ATOM   | 54 | N   | ALA | C | 28 | 64.076 | 25.267 | 41.732 | 1.00138.06 |      |      | N |
| ANISOU | 54 | N   | ALA | C | 28 | 15821  | 21971  | 14663  | 632        | 2631 | 1881 | N |
| ATOM   | 55 | CA  | ALA | C | 28 | 64.076 | 26.233 | 40.640 | 1.00135.96 |      |      | C |
| ANISOU | 55 | CA  | ALA | C | 28 | 15612  | 21657  | 14389  | 747        | 2504 | 1717 | C |
| ATOM   | 56 | CB  | ALA | C | 28 | 65.297 | 27.138 | 40.736 | 1.00130.21 |      |      | C |
| ANISOU | 56 | CB  | ALA | C | 28 | 15085  | 20865  | 13526  | 814        | 2399 | 1738 | C |
| ATOM   | 57 | C   | ALA | C | 28 | 64.030 | 25.512 | 39.286 | 1.00126.96 |      |      | C |
| ANISOU | 57 | C   | ALA | C | 28 | 14401  | 20388  | 13452  | 700        | 2458 | 1673 | C |
| ATOM   | 58 | O   | ALA | C | 28 | 63.381 | 25.978 | 38.343 | 1.00124.94 |      |      | O |
| ANISOU | 58 | O   | ALA | C | 28 | 14098  | 20132  | 13240  | 774        | 2400 | 1515 | O |
| ATOM   | 59 | N   | ALA | C | 29 | 64.724 | 24.375 | 39.209 | 1.00128.52 |      |      | N |
| ANISOU | 59 | N   | ALA | C | 29 | 14590  | 20472  | 13769  | 576        | 2485 | 1814 | N |
| ATOM   | 60 | CA  | ALA | C | 29 | 64.773 | 23.559 | 37.998 | 1.00119.25 |      |      | C |
| ANISOU | 60 | CA  | ALA | C | 29 | 13350  | 19166  | 12793  | 513        | 2452 | 1794 | C |
| ATOM   | 61 | CB  | ALA | C | 29 | 65.693 | 22.368 | 38.192 | 1.00119.28 |      |      | C |
| ANISOU | 61 | CB  | ALA | C | 29 | 13368  | 19055  | 12899  | 375        | 2491 | 1977 | C |
| ATOM   | 62 | C   | ALA | C | 29 | 63.388 | 23.091 | 37.590 | 1.00121.08 |      |      | C |
| ANISOU | 62 | C   | ALA | C | 29 | 13391  | 19473  | 13142  | 496        | 2521 | 1699 | C |
| ATOM   | 63 | O   | ALA | C | 29 | 62.949 | 23.344 | 36.467 | 1.00128.75 |      |      | O |
| ANISOU | 63 | O   | ALA | C | 29 | 14323  | 20406  | 14191  | 546        | 2452 | 1560 | O |
| ATOM   | 64 | N   | GLY | C | 30 | 62.710 | 22.403 | 38.503 | 1.00121.64 |      |      | N |
| ANISOU | 64 | N   | GLY | C | 30 | 13346  | 19649  | 13224  | 425        | 2657 | 1773 | N |
| ATOM   | 65 | CA  | GLY | C | 30 | 61.365 | 21.930 | 38.254 | 1.00118.56 |      |      | C |
| ANISOU | 65 | CA  | GLY | C | 30 | 12768  | 19342  | 12938  | 404        | 2736 | 1689 | C |
| ATOM   | 66 | C   | GLY | C | 30 | 60.459 | 23.100 | 37.922 | 1.00120.60 |      |      | C |
| ANISOU | 66 | C   | GLY | C | 30 | 13006  | 19701  | 13118  | 543        | 2685 | 1497 | C |
| ATOM   | 67 | O   | GLY | C | 30 | 59.592 | 22.997 | 37.050 | 1.00128.62 |      |      | O |
| ANISOU | 67 | O   | GLY | C | 30 | 13906  | 20722  | 14242  | 562        | 2672 | 1372 | O |
| ATOM   | 68 | N   | ALA | C | 31 | 60.671 | 24.217 | 38.615 | 1.00119.24 |      |      | N |
| ANISOU | 68 | N   | ALA | C | 31 | 12945  | 19604  | 12755  | 640        | 2654 | 1474 | N |
| ATOM   | 69 | CA  | ALA | C | 31 | 59.876 | 25.418 | 38.395 | 1.00122.19 |      |      | C |
| ANISOU | 69 | CA  | ALA | C | 31 | 13315  | 20077  | 13037  | 779        | 2605 | 1297 | C |
| ATOM   | 70 | CB  | ALA | C | 31 | 60.266 | 26.501 | 39.380 | 1.00115.94 |      |      | C |
| ANISOU | 70 | CB  | ALA | C | 31 | 12655  | 19366  | 12030  | 863        | 2591 | 1311 | C |
| ATOM   | 71 | C   | ALA | C | 31 | 60.032 | 25.922 | 36.965 | 1.00129.00 |      |      | C |
| ANISOU | 71 | C   | ALA | C | 31 | 14219  | 20833  | 13962  | 853        | 2466 | 1163 | C |
| ATOM   | 72 | O   | ALA | C | 31 | 59.046 | 26.263 | 36.307 | 1.00132.20 |      |      | O |
| ANISOU | 72 | O   | ALA | C | 31 | 14531  | 21286  | 14411  | 918        | 2443 | 1010 | O |
| ATOM   | 73 | N   | ALA | C | 32 | 61.271 | 25.958 | 36.487 | 1.00124.63 |      |      | N |
| ANISOU | 73 | N   | ALA | C | 32 | 13807  | 20134  | 13413  | 842        | 2373 | 1220 | N |
| ATOM   | 74 | CA  | ALA | C | 32 | 61.547 | 26.435 | 35.136 | 1.00117.46 |      |      | C |
| ANISOU | 74 | CA  | ALA | C | 32 | 12959  | 19111  | 12558  | 907        | 2239 | 1102 | C |
| ATOM   | 75 | CB  | ALA | C | 32 | 63.055 | 26.442 | 34.862 | 1.00106.27 |      |      | C |
| ANISOU | 75 | CB  | ALA | C | 32 | 11714  | 17537  | 11129  | 881        | 2155 | 1193 | C |
| ATOM   | 76 | C   | ALA | C | 32 | 60.827 | 25.567 | 34.115 | 1.00120.64 |      |      | C |
| ANISOU | 76 | C   | ALA | C | 32 | 13210  | 19467  | 13160  | 847        | 2251 | 1042 | C |
| ATOM   | 77 | O   | ALA | C | 32 | 60.137 | 26.082 | 33.233 | 1.00125.22 |      |      | O |
| ANISOU | 77 | O   | ALA | C | 32 | 13747  | 20058  | 13771  | 928        | 2187 | 884  | O |
| ATOM   | 78 | N   | THR | C | 33 | 60.989 | 24.252 | 34.251 | 1.00117.35 |      |      | N |
| ANISOU | 78 | N   | THR | C | 33 | 12712  | 18999  | 12875  | 707        | 2335 | 1171 | N |
| ATOM   | 79 | CA  | THR | C | 33 | 60.341 | 23.289 | 33.366 | 1.00114.22 |      |      | C |
| ANISOU | 79 | CA  | THR | C | 33 | 12166  | 18558  | 12677  | 633        | 2362 | 1133 | C |
| ATOM   | 80 | CB  | THR | C | 33 | 60.603 | 21.860 | 33.807 | 1.00105.23 |      |      | C |
| ANISOU | 80 | CB  | THR | C | 33 | 10950  | 17376  | 11656  | 474        | 2473 | 1301 | C |
| ATOM   | 81 | OG1 | THR | C | 33 | 62.006 | 21.602 | 33.706 | 1.00106.83 |      |      | O |
| ANISOU | 81 | OG1 | THR | C | 33 | 11292  | 17432  | 11866  | 422        | 2421 | 1422 | O |
| ATOM   | 82 | CG2 | THR | C | 33 | 59.846 | 20.889 | 32.917 | 1.00105.73 |      |      | C |
| ANISOU | 82 | CG2 | THR | C | 33 | 10848  | 17404  | 11920  | 400        | 2509 | 1253 | C |

|        |     |     |     |   |    |        |        |        |            |       |      |   |
|--------|-----|-----|-----|---|----|--------|--------|--------|------------|-------|------|---|
| ATOM   | 83  | C   | THR | C | 33 | 58.841 | 23.505 | 33.293 | 1.00121.75 |       | C    |   |
| ANISOU | 83  | C   | THR | C | 33 | 12961  | 19650  | 13649  | 686        | 2408  | 993  | C |
| ATOM   | 84  | O   | THR | C | 33 | 58.262 | 23.573 | 32.205 | 1.00124.08 |       | O    |   |
| ANISOU | 84  | O   | THR | C | 33 | 13190  | 19916  | 14040  | 720        | 2350  | 862  | O |
| ATOM   | 85  | N   | VAL | C | 34 | 58.211 | 23.600 | 34.459 | 1.00127.20 |       | N    |   |
| ANISOU | 85  | N   | VAL | C | 34 | 13590  | 20490  | 14250  | 691        | 2513  | 1022 | N |
| ATOM   | 86  | CA  | VAL | C | 34 | 56.778 | 23.816 | 34.512 | 1.00132.69 |       | C    |   |
| ANISOU | 86  | CA  | VAL | C | 34 | 14133  | 21324  | 14957  | 741        | 2566  | 894  | C |
| ATOM   | 87  | CB  | VAL | C | 34 | 56.251 | 23.766 | 35.954 | 1.00129.27 |       | C    |   |
| ANISOU | 87  | CB  | VAL | C | 34 | 13645  | 21045  | 14428  | 721        | 2700  | 960  | C |
| ATOM   | 88  | CG1 | VAL | C | 34 | 54.766 | 24.094 | 35.982 | 1.00134.31 |       | C    |   |
| ANISOU | 88  | CG1 | VAL | C | 34 | 14130  | 21826  | 15075  | 782        | 2749  | 813  | C |
| ATOM   | 89  | CG2 | VAL | C | 34 | 56.516 | 22.402 | 36.562 | 1.00125.79 |       | C    |   |
| ANISOU | 89  | CG2 | VAL | C | 34 | 13142  | 20577  | 14077  | 565        | 2822  | 1134 | C |
| ATOM   | 90  | C   | VAL | C | 34 | 56.444 | 25.158 | 33.874 | 1.00133.18 |       | C    |   |
| ANISOU | 90  | C   | VAL | C | 34 | 14252  | 21415  | 14934  | 897        | 2447  | 715  | C |
| ATOM   | 91  | O   | VAL | C | 34 | 55.497 | 25.269 | 33.089 | 1.00136.66 |       | O    |   |
| ANISOU | 91  | O   | VAL | C | 34 | 14585  | 21884  | 15455  | 941        | 2420  | 573  | O |
| ATOM   | 92  | N   | LEU | C | 35 | 57.273 | 26.156 | 34.147 | 1.00133.07 |       | N    |   |
| ANISOU | 92  | N   | LEU | C | 35 | 14413  | 21383  | 14763  | 979        | 2369  | 722  | N |
| ATOM   | 93  | CA  | LEU | C | 35 | 57.038 | 27.477 | 33.603 | 1.00130.91 |       | C    |   |
| ANISOU | 93  | CA  | LEU | C | 35 | 14211  | 21135  | 14396  | 1131       | 2256  | 560  | C |
| ATOM   | 94  | CB  | LEU | C | 35 | 57.972 | 28.504 | 34.253 | 1.00129.83 |       | C    |   |
| ANISOU | 94  | CB  | LEU | C | 35 | 14264  | 21000  | 14065  | 1207       | 2204  | 599  | C |
| ATOM   | 95  | CG  | LEU | C | 35 | 57.775 | 29.960 | 33.814 | 1.00135.35 |       | C    |   |
| ANISOU | 95  | CG  | LEU | C | 35 | 15050  | 21732  | 14646  | 1370       | 2093  | 437  | C |
| ATOM   | 96  | CD1 | LEU | C | 35 | 56.331 | 30.394 | 34.047 | 1.00135.51 |       | C    |   |
| ANISOU | 96  | CD1 | LEU | C | 35 | 14930  | 21911  | 14647  | 1441       | 2143  | 307  | C |
| ATOM   | 97  | CD2 | LEU | C | 35 | 58.756 | 30.885 | 34.541 | 1.00128.65 |       | C    |   |
| ANISOU | 97  | CD2 | LEU | C | 35 | 14389  | 20886  | 13608  | 1431       | 2055  | 490  | C |
| ATOM   | 98  | C   | LEU | C | 35 | 57.214 | 27.453 | 32.081 | 1.00125.66 |       | C    |   |
| ANISOU | 98  | C   | LEU | C | 35 | 13563  | 20335  | 13848  | 1150       | 2136  | 466  | C |
| ATOM   | 99  | O   | LEU | C | 35 | 56.545 | 28.202 | 31.366 | 1.00123.58 |       | O    |   |
| ANISOU | 99  | O   | LEU | C | 35 | 13278  | 20100  | 13579  | 1255       | 2062  | 304  | O |
| ATOM   | 100 | N   | LEU | C | 36 | 58.111 | 26.600 | 31.595 | 1.00124.87 |       | N    |   |
| ANISOU | 100 | N   | LEU | C | 36 | 13504  | 20086  | 13854  | 1049       | 2118  | 568  | N |
| ATOM   | 101 | CA  | LEU | C | 36 | 58.385 | 26.470 | 30.158 | 1.00116.84 |       | C    |   |
| ANISOU | 101 | CA  | LEU | C | 36 | 12512  | 18926  | 12956  | 1049       | 2010  | 494  | C |
| ATOM   | 102 | CB  | LEU | C | 36 | 59.639 | 25.640 | 29.924 | 1.00115.84 |       | C    |   |
| ANISOU | 102 | CB  | LEU | C | 36 | 12468  | 18637  | 12908  | 937        | 1999  | 638  | C |
| ATOM   | 103 | CG  | LEU | C | 36 | 60.047 | 25.501 | 28.465 | 1.00108.20 |       | C    |   |
| ANISOU | 103 | CG  | LEU | C | 36 | 11543  | 17509  | 12058  | 930        | 1889  | 572  | C |
| ATOM   | 104 | CD1 | LEU | C | 36 | 60.177 | 26.862 | 27.823 | 1.00       | 96.06 |      | C |
| ANISOU | 104 | CD1 | LEU | C | 36 | 10133  | 15952  | 10411  | 1078       | 1753  | 428  | C |
| ATOM   | 105 | CD2 | LEU | C | 36 | 61.346 | 24.728 | 28.341 | 1.00106.70 |       | C    |   |
| ANISOU | 105 | CD2 | LEU | C | 36 | 11444  | 17161  | 11937  | 819        | 1883  | 720  | C |
| ATOM   | 106 | C   | LEU | C | 36 | 57.278 | 25.931 | 29.268 | 1.00110.11 |       | C    |   |
| ANISOU | 106 | C   | LEU | C | 36 | 11487  | 18087  | 12263  | 1029       | 2020  | 387  | C |
| ATOM   | 107 | O   | LEU | C | 36 | 57.035 | 26.474 | 28.201 | 1.00107.52 |       | O    |   |
| ANISOU | 107 | O   | LEU | C | 36 | 11176  | 17714  | 11961  | 1106       | 1914  | 249  | O |
| ATOM   | 108 | N   | VAL | C | 37 | 56.602 | 24.873 | 29.690 | 1.00111.01 |       | N    |   |
| ANISOU | 108 | N   | VAL | C | 37 | 11436  | 18262  | 12483  | 927        | 2145  | 446  | N |
| ATOM   | 109 | CA  | VAL | C | 37 | 55.519 | 24.350 | 28.868 | 1.00107.34 |       | C    |   |
| ANISOU | 109 | CA  | VAL | C | 37 | 10800  | 17815  | 12171  | 906        | 2159  | 341  | C |
| ATOM   | 110 | CB  | VAL | C | 37 | 55.015 | 22.950 | 29.234 | 1.00107.08 |       | C    |   |
| ANISOU | 110 | CB  | VAL | C | 37 | 10595  | 17809  | 12281  | 763        | 2300  | 433  | C |
| ATOM   | 111 | CG1 | VAL | C | 37 | 53.814 | 22.597 | 28.376 | 1.00109.89 |       | C    |   |
| ANISOU | 111 | CG1 | VAL | C | 37 | 10777  | 18198  | 12778  | 763        | 2304  | 300  | C |
| ATOM   | 112 | CG2 | VAL | C | 37 | 56.103 | 21.915 | 29.073 | 1.00102.98 |       | C    |   |
| ANISOU | 112 | CG2 | VAL | C | 37 | 10127  | 17142  | 11858  | 631        | 2318  | 589  | C |
| ATOM   | 113 | C   | VAL | C | 37 | 54.448 | 25.409 | 28.821 | 1.00105.76 |       | C    |   |
| ANISOU | 113 | C   | VAL | C | 37 | 10551  | 17743  | 11889  | 1044       | 2123  | 170  | C |
| ATOM   | 114 | O   | VAL | C | 37 | 53.667 | 25.469 | 27.902 | 1.00108.02 |       | O    |   |

|        |     |     |     |   |    |        |        |        |            |       |      |   |
|--------|-----|-----|-----|---|----|--------|--------|--------|------------|-------|------|---|
| ANISOU | 114 | O   | VAL | C | 37 | 10748  | 18031  | 12262  | 1082       | 2075  | 37   | O |
| ATOM   | 115 | N   | ILE | C | 38 | 54.403 | 26.239 | 29.844 | 1.00115.53 |       |      | N |
| ANISOU | 115 | N   | ILE | C | 38 | 11846  | 19090  | 12959  | 1119       | 2150  | 177  | N |
| ATOM   | 116 | CA  | ILE | C | 38 | 53.468 | 27.341 | 29.886 | 1.00117.78 |       |      | C |
| ANISOU | 116 | CA  | ILE | C | 38 | 12102  | 19498  | 13152  | 1257       | 2116  | 20   | C |
| ATOM   | 117 | CB  | ILE | C | 38 | 53.464 | 27.987 | 31.271 | 1.00122.02 |       |      | C |
| ANISOU | 117 | CB  | ILE | C | 38 | 12686  | 20162  | 13514  | 1302       | 2185  | 68   | C |
| ATOM   | 118 | CG1 | ILE | C | 38 | 52.912 | 26.980 | 32.274 | 1.00119.40 |       |      | C |
| ANISOU | 118 | CG1 | ILE | C | 38 | 12211  | 19922  | 13235  | 1190       | 2351  | 170  | C |
| ATOM   | 119 | CD1 | ILE | C | 38 | 53.090 | 27.381 | 33.710 | 1.00124.99 |       |      | C |
| ANISOU | 119 | CD1 | ILE | C | 38 | 12975  | 20735  | 13781  | 1201       | 2433  | 256  | C |
| ATOM   | 120 | CG2 | ILE | C | 38 | 52.627 | 29.248 | 31.268 | 1.00117.71 |       |      | C |
| ANISOU | 120 | CG2 | ILE | C | 38 | 12133  | 19730  | 12863  | 1455       | 2136  | -96  | C |
| ATOM   | 121 | C   | ILE | C | 38 | 53.786 | 28.341 | 28.772 | 1.00110.77 |       |      | C |
| ANISOU | 121 | C   | ILE | C | 38 | 11334  | 18527  | 12226  | 1375       | 1951  | -109 | C |
| ATOM   | 122 | O   | ILE | C | 38 | 52.880 | 28.849 | 28.137 | 1.00105.87 |       |      | O |
| ANISOU | 122 | O   | ILE | C | 38 | 10643  | 17953  | 11628  | 1461       | 1899  | -264 | O |
| ATOM   | 123 | N   | VAL | C | 39 | 55.072 | 28.597 | 28.549 | 1.00110.56 |       |      | N |
| ANISOU | 123 | N   | VAL | C | 39 | 11488  | 18375  | 12145  | 1375       | 1873  | -42  | N |
| ATOM   | 124 | CA  | VAL | C | 39 | 55.543 | 29.489 | 27.485 | 1.00106.54 |       |      | C |
| ANISOU | 124 | CA  | VAL | C | 39 | 11115  | 17766  | 11599  | 1475       | 1718  | -148 | C |
| ATOM   | 125 | CB  | VAL | C | 39 | 57.044 | 29.755 | 27.582 | 1.00       | 98.60 |      | C |
| ANISOU | 125 | CB  | VAL | C | 39 | 10314  | 16638  | 10510  | 1465       | 1661  | -47  | C |
| ATOM   | 126 | CG1 | VAL | C | 39 | 57.480 | 30.571 | 26.398 | 1.00       | 98.09 |      | C |
| ANISOU | 126 | CG1 | VAL | C | 39 | 10380  | 16463  | 10427  | 1557       | 1507  | -162 | C |
| ATOM   | 127 | CG2 | VAL | C | 39 | 57.383 | 30.495 | 28.856 | 1.00       | 98.98 |      | C |
| ANISOU | 127 | CG2 | VAL | C | 39 | 10453  | 16781  | 10372  | 1517       | 1701  | 12   | C |
| ATOM   | 128 | C   | VAL | C | 39 | 55.286 | 28.945 | 26.087 | 1.00107.30 |       |      | C |
| ANISOU | 128 | C   | VAL | C | 39 | 11147  | 17758  | 11864  | 1442       | 1652  | -226 | C |
| ATOM   | 129 | O   | VAL | C | 39 | 54.914 | 29.670 | 25.182 | 1.00100.01 |       |      | O |
| ANISOU | 129 | O   | VAL | C | 39 | 10246  | 16818  | 10936  | 1542       | 1546  | -373 | O |
| ATOM   | 130 | N   | LEU | C | 40 | 55.517 | 27.643 | 25.905 | 1.00103.43 |       |      | N |
| ANISOU | 130 | N   | LEU | C | 40 | 10581  | 17191  | 11525  | 1298       | 1715  | -123 | N |
| ATOM   | 131 | CA  | LEU | C | 40 | 55.302 | 26.989 | 24.615 | 1.00       | 97.48 |      | C |
| ANISOU | 131 | CA  | LEU | C | 40 | 9761   | 16336  | 10943  | 1248       | 1665  | -182 | C |
| ATOM   | 132 | CB  | LEU | C | 40 | 55.799 | 25.544 | 24.658 | 1.00       | 92.44 |      | C |
| ANISOU | 132 | CB  | LEU | C | 40 | 9064   | 15608  | 10449  | 1077       | 1749  | -32  | C |
| ATOM   | 133 | CG  | LEU | C | 40 | 57.243 | 25.240 | 24.985 | 1.00       | 85.61 |      | C |
| ANISOU | 133 | CG  | LEU | C | 40 | 8349   | 14624  | 9555   | 1005       | 1749  | 126  | C |
| ATOM   | 134 | CD1 | LEU | C | 40 | 57.447 | 23.752 | 25.108 | 1.00       | 96.74 |      | C |
| ANISOU | 134 | CD1 | LEU | C | 40 | 9661   | 15977  | 11121  | 838        | 1852  | 264  | C |
| ATOM   | 135 | CD2 | LEU | C | 40 | 58.102 | 25.787 | 23.887 | 1.00       | 86.94 |      | C |
| ANISOU | 135 | CD2 | LEU | C | 40 | 8677   | 14639  | 9718   | 1052       | 1605  | 69   | C |
| ATOM   | 136 | C   | LEU | C | 40 | 53.845 | 26.972 | 24.166 | 1.00103.23 |       |      | C |
| ANISOU | 136 | C   | LEU | C | 40 | 10309  | 17163  | 11749  | 1288       | 1674  | -327 | C |
| ATOM   | 137 | O   | LEU | C | 40 | 53.533 | 27.335 | 23.041 | 1.00107.46 |       |      | O |
| ANISOU | 137 | O   | LEU | C | 40 | 10848  | 17650  | 12332  | 1349       | 1570  | -458 | O |
| ATOM   | 138 | N   | LEU | C | 41 | 52.945 | 26.576 | 25.057 | 1.00105.34 |       |      | N |
| ANISOU | 138 | N   | LEU | C | 41 | 10424  | 17573  | 12029  | 1257       | 1799  | -306 | N |
| ATOM   | 139 | CA  | LEU | C | 41 | 51.517 | 26.597 | 24.738 | 1.00102.44 |       |      | C |
| ANISOU | 139 | CA  | LEU | C | 41 | 9880   | 17313  | 11731  | 1300       | 1816  | -446 | C |
| ATOM   | 140 | CB  | LEU | C | 41 | 50.704 | 25.907 | 25.840 | 1.00       | 99.53 |      | C |
| ANISOU | 140 | CB  | LEU | C | 41 | 9345   | 17083  | 11391  | 1230       | 1980  | -385 | C |
| ATOM   | 141 | CG  | LEU | C | 41 | 51.077 | 24.452 | 26.153 | 1.00       | 99.96 |      | C |
| ANISOU | 141 | CG  | LEU | C | 41 | 9328   | 17081  | 11569  | 1057       | 2095  | -225 | C |
| ATOM   | 142 | CD1 | LEU | C | 41 | 50.199 | 23.881 | 27.249 | 1.00105.33 |       |      | C |
| ANISOU | 142 | CD1 | LEU | C | 41 | 9849   | 17906  | 12266  | 1001       | 2255  | -180 | C |
| ATOM   | 143 | CD2 | LEU | C | 41 | 51.010 | 23.587 | 24.909 | 1.00       | 95.44 |      | C |
| ANISOU | 143 | CD2 | LEU | C | 41 | 8685   | 16394  | 11183  | 980        | 2057  | -255 | C |
| ATOM   | 144 | C   | LEU | C | 41 | 51.036 | 28.033 | 24.525 | 1.00107.44 |       |      | C |
| ANISOU | 144 | C   | LEU | C | 41 | 10569  | 18016  | 12238  | 1473       | 1715  | -605 | C |
| ATOM   | 145 | O   | LEU | C | 41 | 50.252 | 28.315 | 23.617 | 1.00107.88 |       |      | O |
| ANISOU | 145 | O   | LEU | C | 41 | 10555  | 18081  | 12354  | 1537       | 1643  | -752 | O |



|        |     |     |     |   |    |        |        |        |            |       |       |   |
|--------|-----|-----|-----|---|----|--------|--------|--------|------------|-------|-------|---|
| ATOM   | 146 | N   | ALA | C | 42 | 51.520 | 28.934 | 25.374 | 1.00107.64 | N     |       |   |
| ANISOU | 146 | N   | ALA | C | 42 | 10722  | 18089  | 12089  | 1547       | 1711  | -573  | N |
| ATOM   | 147 | CA  | ALA | C | 42 | 51.156 | 30.344 | 25.300 | 1.00108.19 | C     |       |   |
| ANISOU | 147 | CA  | ALA | C | 42 | 10859  | 18227  | 12023  | 1712       | 1623  | -711  | C |
| ATOM   | 148 | CB  | ALA | C | 42 | 51.764 | 31.121 | 26.458 | 1.00115.72 | C     |       |   |
| ANISOU | 148 | CB  | ALA | C | 42 | 11942  | 19238  | 12788  | 1762       | 1651  | -639  | C |
| ATOM   | 149 | C   | ALA | C | 42 | 51.609 | 30.927 | 23.980 | 1.00101.16 | C     |       |   |
| ANISOU | 149 | C   | ALA | C | 42 | 10088  | 17207  | 11140  | 1784       | 1462  | -808  | C |
| ATOM   | 150 | O   | ALA | C | 42 | 50.834 | 31.586 | 23.289 | 1.00103.92 | O     |       |   |
| ANISOU | 150 | O   | ALA | C | 42 | 10401  | 17592  | 11493  | 1888       | 1383  | -965  | O |
| ATOM   | 151 | N   | GLY | C | 43 | 52.872 | 30.680 | 23.640 | 1.00101.17 | N     |       |   |
| ANISOU | 151 | N   | GLY | C | 43 | 10236  | 17059  | 11146  | 1727       | 1416  | -714  | N |
| ATOM   | 152 | CA  | GLY | C | 43 | 53.434 | 31.144 | 22.385 | 1.00106.00 | C     |       |   |
| ANISOU | 152 | CA  | GLY | C | 43 | 10975  | 17530  | 11769  | 1780       | 1270  | -792  | C |
| ATOM   | 153 | C   | GLY | C | 43 | 52.739 | 30.513 | 21.192 | 1.00102.02 | C     |       |   |
| ANISOU | 153 | C   | GLY | C | 43 | 10349  | 16977  | 11438  | 1744       | 1231  | -882  | C |
| ATOM   | 154 | O   | GLY | C | 43 | 52.431 | 31.196 | 20.214 | 1.00100.57 | O     |       |   |
| ANISOU | 154 | O   | GLY | C | 43 | 10199  | 16761  | 11250  | 1840       | 1113  | -1023 | O |
| ATOM   | 155 | N   | SER | C | 44 | 52.484 | 29.209 | 21.286 | 1.00       | 99.06 | N     |   |
| ANISOU | 155 | N   | SER | C | 44 | 9830   | 16598  | 11211  | 1605       | 1331  | -800  | N |
| ATOM   | 156 | CA  | SER | C | 44 | 51.798 | 28.467 | 20.234 | 1.00103.81 | C     |       |   |
| ANISOU | 156 | CA  | SER | C | 44 | 10297  | 17159  | 11986  | 1553       | 1312  | -874  | C |
| ATOM   | 157 | CB  | SER | C | 44 | 51.552 | 27.020 | 20.672 | 1.00105.27 | C     |       |   |
| ANISOU | 157 | CB  | SER | C | 44 | 10322  | 17362  | 12314  | 1394       | 1454  | -759  | C |
| ATOM   | 158 | OG  | SER | C | 44 | 52.768 | 26.316 | 20.834 | 1.00101.95 | O     |       |   |
| ANISOU | 158 | OG  | SER | C | 44 | 9996   | 16819  | 11921  | 1280       | 1485  | -600  | O |
| ATOM   | 159 | C   | SER | C | 44 | 50.469 | 29.126 | 19.875 | 1.00107.73 | C     |       |   |
| ANISOU | 159 | C   | SER | C | 44 | 10682  | 17770  | 12480  | 1669       | 1268  | -1051 | C |
| ATOM   | 160 | O   | SER | C | 44 | 50.184 | 29.371 | 18.702 | 1.00111.65 | O     |       |   |
| ANISOU | 160 | O   | SER | C | 44 | 11182  | 18206  | 13033  | 1718       | 1159  | -1172 | O |
| ATOM   | 161 | N   | TYR | C | 45 | 49.652 | 29.374 | 20.893 | 1.00109.05 | N     |       |   |
| ANISOU | 161 | N   | TYR | C | 45 | 10747  | 18101  | 12587  | 1708       | 1357  | -1065 | N |
| ATOM   | 162 | CA  | TYR | C | 45 | 48.358 | 30.016 | 20.719 | 1.00114.91 | C     |       |   |
| ANISOU | 162 | CA  | TYR | C | 45 | 11374  | 18966  | 13320  | 1819       | 1329  | -1228 | C |
| ATOM   | 163 | CB  | TYR | C | 45 | 47.541 | 29.995 | 22.006 | 1.00117.02 | C     |       |   |
| ANISOU | 163 | CB  | TYR | C | 45 | 11512  | 19407  | 13542  | 1821       | 1463  | -1207 | C |
| ATOM   | 164 | CG  | TYR | C | 45 | 46.252 | 30.777 | 21.894 | 1.00126.32 | C     |       |   |
| ANISOU | 164 | CG  | TYR | C | 45 | 12584  | 20714  | 14699  | 1946       | 1432  | -1377 | C |
| ATOM   | 165 | CD1 | TYR | C | 45 | 46.213 | 32.132 | 22.179 | 1.00123.15 | C     |       |   |
| ANISOU | 165 | CD1 | TYR | C | 45 | 12284  | 20372  | 14135  | 2095       | 1367  | -1456 | C |
| ATOM   | 166 | CE1 | TYR | C | 45 | 45.045 | 32.853 | 22.073 | 1.00128.17 | C     |       |   |
| ANISOU | 166 | CE1 | TYR | C | 45 | 12821  | 21122  | 14754  | 2211       | 1337  | -1612 | C |
| ATOM   | 167 | CZ  | TYR | C | 45 | 43.901 | 32.224 | 21.659 | 1.00138.69 | C     |       |   |
| ANISOU | 167 | CZ  | TYR | C | 45 | 13952  | 22510  | 16235  | 2180       | 1369  | -1693 | C |
| ATOM   | 168 | OH  | TYR | C | 45 | 42.732 | 32.933 | 21.541 | 1.00142.61 | O     |       |   |
| ANISOU | 168 | OH  | TYR | C | 45 | 14346  | 23117  | 16721  | 2296       | 1336  | -1851 | O |
| ATOM   | 169 | CE2 | TYR | C | 45 | 43.913 | 30.883 | 21.367 | 1.00135.37 | C     |       |   |
| ANISOU | 169 | CE2 | TYR | C | 45 | 13428  | 22033  | 15975  | 2033       | 1434  | -1620 | C |
| ATOM   | 170 | CD2 | TYR | C | 45 | 45.082 | 30.167 | 21.480 | 1.00127.76 | C     |       |   |
| ANISOU | 170 | CD2 | TYR | C | 45 | 12563  | 20954  | 15026  | 1917       | 1466  | -1462 | C |
| ATOM   | 171 | C   | TYR | C | 45 | 48.498 | 31.437 | 20.259 | 1.00113.09 | C     |       |   |
| ANISOU | 171 | C   | TYR | C | 45 | 11289  | 18724  | 12958  | 1981       | 1189  | -1348 | C |
| ATOM   | 172 | O   | TYR | C | 45 | 47.754 | 31.893 | 19.426 | 1.00118.00 | O     |       |   |
| ANISOU | 172 | O   | TYR | C | 45 | 11863  | 19359  | 13611  | 2066       | 1102  | -1496 | O |
| ATOM   | 173 | N   | LEU | C | 46 | 49.429 | 32.175 | 20.829 | 1.00110.30 | N     |       |   |
| ANISOU | 173 | N   | LEU | C | 46 | 11111  | 18348  | 12450  | 2029       | 1169  | -1286 | N |
| ATOM   | 174 | CA  | LEU | C | 46 | 49.614 | 33.540 | 20.388 | 1.00109.16 | C     |       |   |
| ANISOU | 174 | CA  | LEU | C | 46 | 11114  | 18187  | 12177  | 2183       | 1038  | -1398 | C |
| ATOM   | 175 | CB  | LEU | C | 46 | 50.519 | 34.315 | 21.314 | 1.00112.58 | C     |       |   |
| ANISOU | 175 | CB  | LEU | C | 46 | 11714  | 18631  | 12430  | 2230       | 1048  | -1320 | C |
| ATOM   | 176 | CG  | LEU | C | 46 | 49.904 | 34.477 | 22.682 | 1.00111.53 | C     |       |   |
| ANISOU | 176 | CG  | LEU | C | 46 | 11490  | 18668  | 12218  | 2244       | 1170  | -1288 | C |
| ATOM   | 177 | CD1 | LEU | C | 46 | 50.941 | 35.129 | 23.569 | 1.00       | 96.49 | C     |   |

|        |     |     |     |   |    |        |        |        |            |      |       |   |
|--------|-----|-----|-----|---|----|--------|--------|--------|------------|------|-------|---|
| ANISOU | 177 | CD1 | LEU | C | 46 | 9762   | 16757  | 10144  | 2272       | 1181 | -1194 | C |
| ATOM   | 178 | CD2 | LEU | C | 46 | 48.677 | 35.350 | 22.560 | 1.00121.30 |      |       | C |
| ANISOU | 178 | CD2 | LEU | C | 46 | 12639  | 20028  | 13421  | 2378       | 1134 | -1456 | C |
| ATOM   | 179 | C   | LEU | C | 46 | 50.140 | 33.633 | 18.979 | 1.00107.36 |      |       | C |
| ANISOU | 179 | C   | LEU | C | 46 | 10991  | 17798  | 12002  | 2197       | 899  | -1459 | C |
| ATOM   | 180 | O   | LEU | C | 46 | 49.735 | 34.498 | 18.227 | 1.00109.36 |      |       | O |
| ANISOU | 180 | O   | LEU | C | 46 | 11281  | 18049  | 12222  | 2317       | 786  | -1602 | O |
| ATOM   | 181 | N   | ALA | C | 47 | 51.061 | 32.751 | 18.617 | 1.00106.97 |      |       | N |
| ANISOU | 181 | N   | ALA | C | 47 | 10995  | 17611  | 12037  | 2074       | 907  | -1349 | N |
| ATOM   | 182 | CA  | ALA | C | 47 | 51.637 | 32.825 | 17.285 | 1.00106.39 |      |       | C |
| ANISOU | 182 | CA  | ALA | C | 47 | 11034  | 17376  | 12015  | 2080       | 779  | -1401 | C |
| ATOM   | 183 | CB  | ALA | C | 47 | 52.660 | 31.727 | 17.130 | 1.0094.44  |      |       | C |
| ANISOU | 183 | CB  | ALA | C | 47 | 9562   | 15724  | 10597  | 1925       | 820  | -1256 | C |
| ATOM   | 184 | C   | ALA | C | 47 | 50.616 | 32.707 | 16.187 | 1.00104.44 |      |       | C |
| ANISOU | 184 | C   | ALA | C | 47 | 10668  | 17133  | 11883  | 2109       | 712  | -1546 | C |
| ATOM   | 185 | O   | ALA | C | 47 | 50.595 | 33.504 | 15.265 | 1.00102.28 |      |       | O |
| ANISOU | 185 | O   | ALA | C | 47 | 10484  | 16803  | 11573  | 2211       | 581  | -1665 | O |
| ATOM   | 186 | N   | VAL | C | 48 | 49.737 | 31.733 | 16.303 | 1.00106.60 |      |       | N |
| ANISOU | 186 | N   | VAL | C | 48 | 10736  | 17475  | 12291  | 2025       | 803  | -1537 | N |
| ATOM   | 187 | CA  | VAL | C | 48 | 48.682 | 31.550 | 15.315 | 1.00100.83 |      |       | C |
| ANISOU | 187 | CA  | VAL | C | 48 | 9872   | 16760  | 11678  | 2047       | 748  | -1674 | C |
| ATOM   | 188 | CB  | VAL | C | 48 | 47.746 | 30.374 | 15.668 | 1.0098.12  |      |       | C |
| ANISOU | 188 | CB  | VAL | C | 48 | 9291   | 16506  | 11483  | 1938       | 876  | -1644 | C |
| ATOM   | 189 | CG1 | VAL | C | 48 | 46.547 | 30.363 | 14.742 | 1.00101.54 |      |       | C |
| ANISOU | 189 | CG1 | VAL | C | 48 | 9583   | 16980  | 12019  | 1984       | 815  | -1803 | C |
| ATOM   | 190 | CG2 | VAL | C | 48 | 48.478 | 29.053 | 15.576 | 1.0096.52  |      |       | C |
| ANISOU | 190 | CG2 | VAL | C | 48 | 9075   | 16195  | 11404  | 1764       | 949  | -1501 | C |
| ATOM   | 191 | C   | VAL | C | 48 | 47.869 | 32.828 | 15.204 | 1.00102.20 |      |       | C |
| ANISOU | 191 | C   | VAL | C | 48 | 10050  | 17032  | 11749  | 2221       | 663  | -1834 | C |
| ATOM   | 192 | O   | VAL | C | 48 | 47.574 | 33.286 | 14.107 | 1.00107.53 |      |       | O |
| ANISOU | 192 | O   | VAL | C | 48 | 10753  | 17656  | 12446  | 2296       | 539  | -1962 | O |
| ATOM   | 193 | N   | LEU | C | 49 | 47.533 | 33.416 | 16.346 | 1.00105.37 |      |       | N |
| ANISOU | 193 | N   | LEU | C | 49 | 10429  | 17572  | 12036  | 2286       | 730  | -1825 | N |
| ATOM   | 194 | CA  | LEU | C | 49 | 46.766 | 34.654 | 16.373 | 1.00110.65 |      |       | C |
| ANISOU | 194 | CA  | LEU | C | 49 | 11099  | 18342  | 12600  | 2453       | 662  | -1969 | C |
| ATOM   | 195 | CB  | LEU | C | 49 | 46.488 | 35.089 | 17.809 | 1.00113.14 |      |       | C |
| ANISOU | 195 | CB  | LEU | C | 49 | 11381  | 18809  | 12800  | 2491       | 769  | -1927 | C |
| ATOM   | 196 | CG  | LEU | C | 49 | 45.711 | 36.402 | 17.968 | 1.00117.37 |      |       | C |
| ANISOU | 196 | CG  | LEU | C | 49 | 11918  | 19457  | 13219  | 2663       | 711  | -2069 | C |
| ATOM   | 197 | CD1 | LEU | C | 49 | 44.199 | 36.161 | 18.091 | 1.00122.30 |      |       | C |
| ANISOU | 197 | CD1 | LEU | C | 49 | 12310  | 20223  | 13935  | 2681       | 764  | -2168 | C |
| ATOM   | 198 | CD2 | LEU | C | 49 | 46.266 | 37.271 | 19.085 | 1.00118.51 |      |       | C |
| ANISOU | 198 | CD2 | LEU | C | 49 | 12187  | 19660  | 13180  | 2727       | 749  | -2012 | C |
| ATOM   | 199 | C   | LEU | C | 49 | 47.539 | 35.758 | 15.662 | 1.00104.22 |      |       | C |
| ANISOU | 199 | C   | LEU | C | 49 | 10506  | 17423  | 11672  | 2564       | 514  | -2031 | C |
| ATOM   | 200 | O   | LEU | C | 49 | 46.976 | 36.546 | 14.904 | 1.00102.54 |      |       | O |
| ANISOU | 200 | O   | LEU | C | 49 | 10305  | 17218  | 11438  | 2683       | 401  | -2178 | O |
| ATOM   | 201 | N   | ALA | C | 50 | 48.831 | 35.835 | 15.952 | 1.00105.46 |      |       | N |
| ANISOU | 201 | N   | ALA | C | 50 | 10837  | 17484  | 11749  | 2527       | 516  | -1916 | N |
| ATOM   | 202 | CA  | ALA | C | 50 | 49.670 | 36.860 | 15.360 | 1.00102.99 |      |       | C |
| ANISOU | 202 | CA  | ALA | C | 50 | 10745  | 17066  | 11322  | 2625       | 386  | -1963 | C |
| ATOM   | 203 | CB  | ALA | C | 50 | 51.013 | 36.935 | 16.098 | 1.00102.62 |      |       | C |
| ANISOU | 203 | CB  | ALA | C | 50 | 10864  | 16956  | 11172  | 2580       | 427  | -1819 | C |
| ATOM   | 204 | C   | ALA | C | 50 | 49.894 | 36.614 | 13.873 | 1.00104.25 |      |       | C |
| ANISOU | 204 | C   | ALA | C | 50 | 10955  | 17074  | 11580  | 2606       | 269  | -2028 | C |
| ATOM   | 205 | O   | ALA | C | 50 | 49.967 | 37.566 | 13.091 | 1.00103.13 |      |       | O |
| ANISOU | 205 | O   | ALA | C | 50 | 10933  | 16879  | 11371  | 2722       | 139  | -2140 | O |
| ATOM   | 206 | N   | GLU | C | 51 | 49.996 | 35.339 | 13.487 | 1.00104.42 |      |       | N |
| ANISOU | 206 | N   | GLU | C | 51 | 10889  | 17026  | 11761  | 2459       | 316  | -1958 | N |
| ATOM   | 207 | CA  | GLU | C | 51 | 50.277 | 34.974 | 12.093 | 1.00102.02 |      |       | C |
| ANISOU | 207 | CA  | GLU | C | 51 | 10632  | 16568  | 11562  | 2420       | 216  | -2005 | C |
| ATOM   | 208 | CB  | GLU | C | 51 | 51.246 | 33.792 | 12.060 | 1.0098.16  |      |       | C |
| ANISOU | 208 | CB  | GLU | C | 51 | 10168  | 15956  | 11173  | 2250       | 281  | -1854 | C |

|        |     |     |     |   |    |        |        |        |      |        |       |   |
|--------|-----|-----|-----|---|----|--------|--------|--------|------|--------|-------|---|
| ATOM   | 209 | CG  | GLU | C | 51 | 52.554 | 34.074 | 12.791 | 1.00 | 92.58  | C     |   |
| ANISOU | 209 | CG  | GLU | C | 51 | 9638   | 15190  | 10349  | 2233 | 309    | -1728 | C |
| ATOM   | 210 | CD  | GLU | C | 51 | 53.528 | 34.860 | 11.933 | 1.00 | 89.03  | C     |   |
| ANISOU | 210 | CD  | GLU | C | 51 | 9416   | 14587  | 9823   | 2296 | 176    | -1772 | C |
| ATOM   | 211 | OE1 | GLU | C | 51 | 54.026 | 34.307 | 10.924 | 1.00 | 86.85  | O     |   |
| ANISOU | 211 | OE1 | GLU | C | 51 | 9189   | 14162  | 9649   | 2221 | 124    | -1767 | O |
| ATOM   | 212 | OE2 | GLU | C | 51 | 53.800 | 36.033 | 12.272 | 1.00 | 80.22  | O     |   |
| ANISOU | 212 | OE2 | GLU | C | 51 | 8432   | 13501  | 8547   | 2419 | 127    | -1812 | O |
| ATOM   | 213 | C   | GLU | C | 51 | 49.079 | 34.657 | 11.186 | 1.00 | 102.45 | C     |   |
| ANISOU | 213 | C   | GLU | C | 51 | 10525  | 16657  | 11745  | 2432 | 170    | -2134 | C |
| ATOM   | 214 | O   | GLU | C | 51 | 49.021 | 35.172 | 10.078 | 1.00 | 103.92 | O     |   |
| ANISOU | 214 | O   | GLU | C | 51 | 10788  | 16766  | 11933  | 2503 | 39     | -2247 | O |
| ATOM   | 215 | N   | ARG | C | 52 | 48.154 | 33.802 | 11.631 | 1.00 | 104.56 | N     |   |
| ANISOU | 215 | N   | ARG | C | 52 | 10574  | 17032  | 12121  | 2360 | 277    | -2117 | N |
| ATOM   | 216 | CA  | ARG | C | 52 | 47.010 | 33.384 | 10.798 | 1.00 | 104.76 | C     |   |
| ANISOU | 216 | CA  | ARG | C | 52 | 10430  | 17091  | 12283  | 2358 | 243    | -2233 | C |
| ATOM   | 217 | CB  | ARG | C | 52 | 45.971 | 32.614 | 11.616 | 1.00 | 103.30 | C     |   |
| ANISOU | 217 | CB  | ARG | C | 52 | 10007  | 17057  | 12185  | 2296 | 382    | -2209 | C |
| ATOM   | 218 | CG  | ARG | C | 52 | 45.164 | 31.637 | 10.800 | 1.00 | 104.79 | C     |   |
| ANISOU | 218 | CG  | ARG | C | 52 | 10020  | 17236  | 12559  | 2215 | 386    | -2263 | C |
| ATOM   | 219 | CD  | ARG | C | 52 | 43.945 | 31.127 | 11.549 | 1.00 | 125.45 | C     |   |
| ANISOU | 219 | CD  | ARG | C | 52 | 12399  | 20019  | 15247  | 2190 | 506    | -2280 | C |
| ATOM   | 220 | NE  | ARG | C | 52 | 43.203 | 30.177 | 10.725 | 1.00 | 150.31 | N     |   |
| ANISOU | 220 | NE  | ARG | C | 52 | 15381  | 23153  | 18576  | 2110 | 509    | -2335 | N |
| ATOM   | 221 | CZ  | ARG | C | 52 | 42.277 | 30.517 | 9.828  | 1.00 | 159.22 | C     |   |
| ANISOU | 221 | CZ  | ARG | C | 52 | 16435  | 24307  | 19755  | 2190 | 409    | -2493 | C |
| ATOM   | 222 | NH1 | ARG | C | 52 | 41.960 | 31.792 | 9.640  | 1.00 | 160.68 | N     |   |
| ANISOU | 222 | NH1 | ARG | C | 52 | 16695  | 24534  | 19824  | 2355 | 299    | -2614 | N |
| ATOM   | 223 | NH2 | ARG | C | 52 | 41.663 | 29.580 | 9.115  | 1.00 | 155.77 | N     |   |
| ANISOU | 223 | NH2 | ARG | C | 52 | 15847  | 23854  | 19485  | 2106 | 419    | -2532 | N |
| ATOM   | 224 | C   | ARG | C | 52 | 46.328 | 34.556 | 10.106 | 1.00 | 108.35 | C     |   |
| ANISOU | 224 | C   | ARG | C | 52 | 10919  | 17579  | 12671  | 2526 | 105    | -2410 | C |
| ATOM   | 225 | O   | ARG | C | 52 | 45.984 | 35.553 | 10.744 | 1.00 | 102.65 | O     |   |
| ANISOU | 225 | O   | ARG | C | 52 | 10219  | 16963  | 11822  | 2650 | 98     | -2461 | O |
| ATOM   | 226 | N   | GLY | C | 53 | 46.121 | 34.415 | 8.802  | 1.00 | 114.49 | N     |   |
| ANISOU | 226 | N   | GLY | C | 53 | 11699  | 18265  | 13536  | 2527 | -2     | -2502 | N |
| ATOM   | 227 | CA  | GLY | C | 53 | 45.499 | 35.462 | 8.018  | 1.00 | 118.98 | C     |   |
| ANISOU | 227 | CA  | GLY | C | 53 | 12305  | 18850  | 14053  | 2681 | -143   | -2670 | C |
| ATOM   | 228 | C   | GLY | C | 53 | 46.477 | 36.487 | 7.469  | 1.00 | 118.44 | C     |   |
| ANISOU | 228 | C   | GLY | C | 53 | 12490  | 18659  | 13854  | 2771 | -269   | -2698 | C |
| ATOM   | 229 | O   | GLY | C | 53 | 46.076 | 37.439 | 6.800  | 1.00 | 122.44 | O     |   |
| ANISOU | 229 | O   | GLY | C | 53 | 13055  | 19165  | 14301  | 2906 | -394   | -2834 | O |
| ATOM   | 230 | N   | ALA | C | 54 | 47.762 | 36.304 | 7.751  | 1.00 | 112.71 | N     |   |
| ANISOU | 230 | N   | ALA | C | 54 | 11916  | 17827  | 13082  | 2700 | -236   | -2570 | N |
| ATOM   | 231 | CA  | ALA | C | 54 | 48.778 | 37.210 | 7.233  | 1.00 | 111.41 | C     |   |
| ANISOU | 231 | CA  | ALA | C | 54 | 11998  | 17535  | 12799  | 2773 | -347   | -2590 | C |
| ATOM   | 232 | CB  | ALA | C | 54 | 49.977 | 37.272 | 8.169  | 1.00 | 111.66 | C     |   |
| ANISOU | 232 | CB  | ALA | C | 54 | 12163  | 17529  | 12732  | 2730 | -273   | -2445 | C |
| ATOM   | 233 | C   | ALA | C | 54 | 49.206 | 36.747 | 5.855  | 1.00 | 113.22 | C     |   |
| ANISOU | 233 | C   | ALA | C | 54 | 12299  | 17593  | 13127  | 2710 | -440   | -2619 | C |
| ATOM   | 234 | O   | ALA | C | 54 | 48.976 | 35.598 | 5.490  | 1.00 | 117.71 | O     |   |
| ANISOU | 234 | O   | ALA | C | 54 | 12742  | 18132  | 13852  | 2583 | -393   | -2583 | O |
| ATOM   | 235 | N   | PRO | C | 55 | 49.856 | 37.630 | 5.086  | 1.00 | 113.75 | N     |   |
| ANISOU | 235 | N   | PRO | C | 55 | 12573  | 17543  | 13104  | 2794 | -567   | -2682 | N |
| ATOM   | 236 | CA  | PRO | C | 55 | 50.300 | 37.222 | 3.750  | 1.00 | 109.80 | C     |   |
| ANISOU | 236 | CA  | PRO | C | 55 | 12154  | 16872  | 12692  | 2733 | -657   | -2712 | C |
| ATOM   | 237 | CB  | PRO | C | 55 | 50.344 | 38.535 | 2.965  | 1.00 | 97.40  | C     |   |
| ANISOU | 237 | CB  | PRO | C | 55 | 10754  | 15251  | 11004  | 2892 | -812   | -2847 | C |
| ATOM   | 238 | CG  | PRO | C | 55 | 50.314 | 39.618 | 3.972  | 1.00 | 108.20 | C     |   |
| ANISOU | 238 | CG  | PRO | C | 55 | 12175  | 16730  | 12205  | 3020 | -794   | -2855 | C |
| ATOM   | 239 | CD  | PRO | C | 55 | 50.160 | 39.045 | 5.351  | 1.00 | 116.78 | C     |   |
| ANISOU | 239 | CD  | PRO | C | 55 | 13122  | 17945  | 13303  | 2950 | -636   | -2737 | C |
| ATOM   | 240 | C   | PRO | C | 55 | 51.680 | 36.558 | 3.828  | 1.00 | 108.13 | C     |   |

|        |     |     |     |   |    |        |        |        |            |       |       |   |
|--------|-----|-----|-----|---|----|--------|--------|--------|------------|-------|-------|---|
| ANISOU | 240 | C   | PRO | C | 55 | 12065  | 16514  | 12507  | 2599       | -604  | -2566 | C |
| ATOM   | 241 | O   | PRO | C | 55 | 52.595 | 37.104 | 4.452  | 1.00102.17 |       |       | O |
| ANISOU | 241 | O   | PRO | C | 55 | 11459  | 15731  | 11630  | 2627       | -587  | -2499 | O |
| ATOM   | 242 | N   | GLY | C | 56 | 51.807 | 35.398 | 3.210  | 1.00104.80 |       |       | N |
| ANISOU | 242 | N   | GLY | C | 56 | 11575  | 16002  | 12242  | 2456       | -579  | -2522 | N |
| ATOM   | 243 | CA  | GLY | C | 56 | 53.029 | 34.648 | 3.248  | 1.00       | 96.34 |       | C |
| ANISOU | 243 | CA  | GLY | C | 56 | 10595  | 14792  | 11217  | 2318       | -524  | -2385 | C |
| ATOM   | 244 | C   | GLY | C | 56 | 53.375 | 34.217 | 4.640  | 1.00       | 88.07 |       | C |
| ANISOU | 244 | C   | GLY | C | 56 | 9491   | 13825  | 10147  | 2253       | -380  | -2237 | C |
| ATOM   | 245 | O   | GLY | C | 56 | 54.507 | 34.237 | 5.020  | 1.00       | 96.41 |       | O |
| ANISOU | 245 | O   | GLY | C | 56 | 10684  | 14799  | 11150  | 2212       | -353  | -2135 | O |
| ATOM   | 246 | N   | ALA | C | 57 | 52.388 | 33.817 | 5.410  | 1.00       | 89.53 |       | N |
| ANISOU | 246 | N   | ALA | C | 57 | 9471   | 14172  | 10372  | 2242       | -287  | -2226 | N |
| ATOM   | 247 | CA  | ALA | C | 57 | 52.624 | 33.372 | 6.764  | 1.00       | 84.94 |       | C |
| ANISOU | 247 | CA  | ALA | C | 57 | 8826   | 13677  | 9771   | 2177       | -145  | -2086 | C |
| ATOM   | 248 | CB  | ALA | C | 57 | 51.646 | 34.038 | 7.685  | 1.00       | 93.43 |       | C |
| ANISOU | 248 | CB  | ALA | C | 57 | 9797   | 14947  | 10756  | 2289       | -108  | -2138 | C |
| ATOM   | 249 | C   | ALA | C | 57 | 52.391 | 31.902 | 6.790  | 1.00       | 88.26 |       | C |
| ANISOU | 249 | C   | ALA | C | 57 | 9075   | 14093  | 10368  | 2012       | -40   | -2001 | C |
| ATOM   | 250 | O   | ALA | C | 57 | 51.532 | 31.442 | 6.087  | 1.00       | 98.39 |       | O |
| ANISOU | 250 | O   | ALA | C | 57 | 10226  | 15393  | 11766  | 1990       | -62   | -2080 | O |
| ATOM   | 251 | N   | GLN | C | 58 | 53.160 | 31.149 | 7.559  | 1.00       | 90.98 |       | N |
| ANISOU | 251 | N   | GLN | C | 58 | 9422   | 14408  | 10738  | 1894       | 70    | -1841 | N |
| ATOM   | 252 | CA  | GLN | C | 58 | 52.946 | 29.711 | 7.595  | 1.00       | 98.41 |       | C |
| ANISOU | 252 | CA  | GLN | C | 58 | 10199  | 15343  | 11851  | 1732       | 176   | -1755 | C |
| ATOM   | 253 | CB  | GLN | C | 58 | 54.168 | 28.985 | 7.060  | 1.00101.41 |       |       | C |
| ANISOU | 253 | CB  | GLN | C | 58 | 10690  | 15532  | 12308  | 1604       | 176   | -1655 | C |
| ATOM   | 254 | CG  | GLN | C | 58 | 53.835 | 27.701 | 6.324  | 1.00107.52 |       |       | C |
| ANISOU | 254 | CG  | GLN | C | 58 | 11326  | 16248  | 13280  | 1464       | 213   | -1642 | C |
| ATOM   | 255 | CD  | GLN | C | 58 | 53.478 | 27.922 | 4.873  | 1.00111.11 |       |       | C |
| ANISOU | 255 | CD  | GLN | C | 58 | 11808  | 16619  | 13791  | 1500       | 84    | -1785 | C |
| ATOM   | 256 | OE1 | GLN | C | 58 | 54.120 | 28.699 | 4.177  | 1.00115.41 |       |       | O |
| ANISOU | 256 | OE1 | GLN | C | 58 | 12539  | 17052  | 14259  | 1567       | -32   | -1842 | O |
| ATOM   | 257 | NE2 | GLN | C | 58 | 52.452 | 27.226 | 4.407  | 1.00122.87 |       |       | N |
| ANISOU | 257 | NE2 | GLN | C | 58 | 13112  | 18160  | 15414  | 1454       | 104   | -1845 | N |
| ATOM   | 258 | C   | GLN | C | 58 | 52.541 | 29.169 | 8.956  | 1.00       | 95.54 |       | C |
| ANISOU | 258 | C   | GLN | C | 58 | 9684   | 15125  | 11492  | 1681       | 329   | -1653 | C |
| ATOM   | 259 | O   | GLN | C | 58 | 52.078 | 28.049 | 9.079  | 1.00       | 95.02 |       | O |
| ANISOU | 259 | O   | GLN | C | 58 | 9450   | 15090  | 11564  | 1565       | 425   | -1601 | O |
| ATOM   | 260 | N   | LEU | C | 59 | 52.719 | 29.994 | 9.971  | 1.00       | 95.72 |       | N |
| ANISOU | 260 | N   | LEU | C | 59 | 9773   | 15235  | 11360  | 1769       | 351   | -1626 | N |
| ATOM   | 261 | CA  | LEU | C | 59 | 52.412 | 29.671 | 11.356 | 1.00       | 99.21 |       | C |
| ANISOU | 261 | CA  | LEU | C | 59 | 10102  | 15818  | 11774  | 1736       | 491   | -1530 | C |
| ATOM   | 262 | CB  | LEU | C | 59 | 53.265 | 30.529 | 12.302 | 1.00       | 89.14 |       | C |
| ANISOU | 262 | CB  | LEU | C | 59 | 8990   | 14558  | 10322  | 1803       | 497   | -1461 | C |
| ATOM   | 263 | CG  | LEU | C | 59 | 54.021 | 29.905 | 13.477 | 1.00       | 80.10 |       | C |
| ANISOU | 263 | CG  | LEU | C | 59 | 7853   | 13422  | 9159   | 1701       | 624   | -1280 | C |
| ATOM   | 264 | CD1 | LEU | C | 59 | 54.765 | 28.650 | 13.058 | 1.00       | 76.17 |       | C |
| ANISOU | 264 | CD1 | LEU | C | 59 | 7350   | 12783  | 8809   | 1535       | 666   | -1165 | C |
| ATOM   | 265 | CD2 | LEU | C | 59 | 54.991 | 30.934 | 14.036 | 1.00       | 76.51 |       | C |
| ANISOU | 265 | CD2 | LEU | C | 59 | 7601   | 12944  | 8525   | 1784       | 584   | -1243 | C |
| ATOM   | 266 | C   | LEU | C | 59 | 50.911 | 29.930 | 11.520 | 1.00       | 95.47 |       | C |
| ANISOU | 266 | C   | LEU | C | 59 | 9449   | 15514  | 11311  | 1816       | 505   | -1649 | C |
| ATOM   | 267 | O   | LEU | C | 59 | 50.488 | 30.748 | 12.332 | 1.00       | 98.81 |       | O |
| ANISOU | 267 | O   | LEU | C | 59 | 9866   | 16066  | 11612  | 1920       | 521   | -1682 | O |
| ATOM   | 268 | N   | ILE | C | 60 | 50.111 | 29.225 | 10.727 | 1.00       | 95.23 |       | N |
| ANISOU | 268 | N   | ILE | C | 60 | 9271   | 15480  | 11431  | 1765       | 498   | -1716 | N |
| ATOM   | 269 | CA  | ILE | C | 60 | 48.680 | 29.487 | 10.661 | 1.00       | 95.75 |       | C |
| ANISOU | 269 | CA  | ILE | C | 60 | 9169   | 15688  | 11522  | 1844       | 491   | -1850 | C |
| ATOM   | 270 | CB  | ILE | C | 60 | 48.267 | 29.810 | 9.196  | 1.00104.59 |       |       | C |
| ANISOU | 270 | CB  | ILE | C | 60 | 10307  | 16736  | 12697  | 1904       | 345   | -2003 | C |
| ATOM   | 271 | CG1 | ILE | C | 60 | 48.411 | 28.590 | 8.293  | 1.00       | 97.46 |       | C |
| ANISOU | 271 | CG1 | ILE | C | 60 | 9340   | 15716  | 11973  | 1758       | 355   | -1972 | C |

|        |     |     |     |   |    |        |        |        |      |        |       |   |
|--------|-----|-----|-----|---|----|--------|--------|--------|------|--------|-------|---|
| ATOM   | 272 | CD1 | ILE | C | 60 | 48.026 | 28.857 | 6.856  | 1.00 | 95.46  | C     |   |
| ANISOU | 272 | CD1 | ILE | C | 60 | 9107   | 15389  | 11775  | 1808 | 214    | -2118 | C |
| ATOM   | 273 | CG2 | ILE | C | 60 | 49.099 | 30.963 | 8.647  | 1.00 | 95.17  | C     |   |
| ANISOU | 273 | CG2 | ILE | C | 60 | 9351   | 15439  | 11369  | 2013 | 206    | -2054 | C |
| ATOM   | 274 | C   | ILE | C | 60 | 47.760 | 28.388 | 11.206 | 1.00 | 96.95  | C     |   |
| ANISOU | 274 | C   | ILE | C | 60 | 9082   | 15951  | 11804  | 1743 | 630    | -1811 | C |
| ATOM   | 275 | O   | ILE | C | 60 | 46.545 | 28.472 | 11.057 | 1.00 | 103.14 | O     |   |
| ANISOU | 275 | O   | ILE | C | 60 | 9711   | 16843  | 12633  | 1794 | 626    | -1925 | O |
| ATOM   | 276 | N   | THR | C | 61 | 48.320 | 27.353 | 11.820 | 1.00 | 98.53  | N     |   |
| ANISOU | 276 | N   | THR | C | 61 | 9249   | 16121  | 12067  | 1600 | 752    | -1654 | N |
| ATOM   | 277 | CA  | THR | C | 61 | 47.487 | 26.346 | 12.481 | 1.00 | 104.74 | C     |   |
| ANISOU | 277 | CA  | THR | C | 61 | 9816   | 17018  | 12962  | 1505 | 897    | -1608 | C |
| ATOM   | 278 | CB  | THR | C | 61 | 47.252 | 25.061 | 11.614 | 1.00 | 95.72  | C     |   |
| ANISOU | 278 | CB  | THR | C | 61 | 8549   | 15798  | 12022  | 1367 | 924    | -1601 | C |
| ATOM   | 279 | OG1 | THR | C | 61 | 48.320 | 24.121 | 11.788 | 1.00 | 99.20  | O     |   |
| ANISOU | 279 | OG1 | THR | C | 61 | 9047   | 16124  | 12522  | 1222 | 995    | -1438 | O |
| ATOM   | 280 | CG2 | THR | C | 61 | 47.130 | 25.398 | 10.156 | 1.00 | 91.81  | C     |   |
| ANISOU | 280 | CG2 | THR | C | 61 | 8105   | 15208  | 11572  | 1417 | 773    | -1734 | C |
| ATOM   | 281 | C   | THR | C | 61 | 48.167 | 25.989 | 13.810 | 1.00 | 107.24 | C     |   |
| ANISOU | 281 | C   | THR | C | 61 | 10163  | 17365  | 13219  | 1434 | 1027   | -1437 | C |
| ATOM   | 282 | O   | THR | C | 61 | 49.382 | 26.119 | 13.946 | 1.00 | 106.83 | O     |   |
| ANISOU | 282 | O   | THR | C | 61 | 10281  | 17208  | 13101  | 1410 | 1007   | -1338 | O |
| ATOM   | 283 | N   | TYR | C | 62 | 47.366 | 25.550 | 14.786 | 1.00 | 107.65 | N     |   |
| ANISOU | 283 | N   | TYR | C | 62 | 11460  | 16778  | 12665  | 321  | 1672   | -355  | N |
| ATOM   | 284 | CA  | TYR | C | 62 | 47.854 | 25.214 | 16.132 | 1.00 | 113.56 | C     |   |
| ANISOU | 284 | CA  | TYR | C | 62 | 12320  | 17413  | 13415  | 154  | 1637   | -303  | C |
| ATOM   | 285 | CB  | TYR | C | 62 | 46.687 | 24.873 | 17.072 | 1.00 | 122.90 | C     |   |
| ANISOU | 285 | CB  | TYR | C | 62 | 13394  | 18895  | 14406  | 84   | 1697   | -360  | C |
| ATOM   | 286 | CG  | TYR | C | 62 | 45.729 | 25.994 | 17.397 | 1.00 | 130.17 | C     |   |
| ANISOU | 286 | CG  | TYR | C | 62 | 14292  | 20029  | 15138  | 313  | 1747   | -450  | C |
| ATOM   | 287 | CD1 | TYR | C | 62 | 46.063 | 26.981 | 18.293 | 1.00 | 130.60 | C     |   |
| ANISOU | 287 | CD1 | TYR | C | 62 | 14501  | 19977  | 15146  | 425  | 1721   | -449  | C |
| ATOM   | 288 | CE1 | TYR | C | 62 | 45.182 | 28.000 | 18.584 | 1.00 | 136.94 | C     |   |
| ANISOU | 288 | CE1 | TYR | C | 62 | 15281  | 20975  | 15776  | 634  | 1768   | -532  | C |
| ATOM   | 289 | CZ  | TYR | C | 62 | 43.949 | 28.030 | 17.986 | 1.00 | 140.83 | C     |   |
| ANISOU | 289 | CZ  | TYR | C | 62 | 15594  | 21775  | 16141  | 732  | 1841   | -616  | C |
| ATOM   | 290 | OH  | TYR | C | 62 | 43.058 | 29.034 | 18.261 | 1.00 | 143.49 | O     |   |
| ANISOU | 290 | OH  | TYR | C | 62 | 15905  | 22310  | 16306  | 940  | 1889   | -699  | O |
| ATOM   | 291 | CE2 | TYR | C | 62 | 43.591 | 27.050 | 17.104 | 1.00 | 143.16 | C     |   |
| ANISOU | 291 | CE2 | TYR | C | 62 | 15734  | 22184  | 16478  | 621  | 1868   | -617  | C |
| ATOM   | 292 | CD2 | TYR | C | 62 | 44.477 | 26.037 | 16.822 | 1.00 | 143.25 | C     |   |
| ANISOU | 292 | CD2 | TYR | C | 62 | 15770  | 21998  | 16661  | 412  | 1821   | -535  | C |
| ATOM   | 293 | C   | TYR | C | 62 | 48.819 | 24.063 | 16.255 | 1.00 | 110.24 | C     |   |
| ANISOU | 293 | C   | TYR | C | 62 | 11947  | 16778  | 13162  | -107 | 1585   | -207  | C |
| ATOM   | 294 | O   | TYR | C | 62 | 49.845 | 24.180 | 16.896 | 1.00 | 113.62 | O     |   |
| ANISOU | 294 | O   | TYR | C | 62 | 12539  | 16947  | 13684  | -171 | 1523   | -138  | O |
| ATOM   | 295 | N   | PRO | C | 63 | 48.518 | 22.949 | 15.625 | 1.00 | 106.50 | N     |   |
| ANISOU | 295 | N   | PRO | C | 63 | 11332  | 16405  | 12729  | -260 | 1608   | -201  | N |
| ATOM   | 296 | CA  | PRO | C | 63 | 49.432 | 21.795 | 15.731 | 1.00 | 105.52 | C     |   |
| ANISOU | 296 | CA  | PRO | C | 63 | 11247  | 16079  | 12766  | -518 | 1559   | -109  | C |
| ATOM   | 297 | CB  | PRO | C | 63 | 48.686 | 20.702 | 14.948 | 1.00 | 105.59 | C     |   |
| ANISOU | 297 | CB  | PRO | C | 63 | 11057  | 16299  | 12764  | -638 | 1608   | -133  | C |
| ATOM   | 298 | CG  | PRO | C | 63 | 47.914 | 21.447 | 13.924 | 1.00 | 116.22 | C     |   |
| ANISOU | 298 | CG  | PRO | C | 63 | 12303  | 17820  | 14034  | -405 | 1657   | -212  | C |
| ATOM   | 299 | CD  | PRO | C | 63 | 47.466 | 22.682 | 14.624 | 1.00 | 111.17 | C     |   |
| ANISOU | 299 | CD  | PRO | C | 63 | 11727  | 17265  | 13248  | -202 | 1674   | -269  | C |
| ATOM   | 300 | C   | PRO | C | 63 | 50.844 | 21.986 | 15.162 | 1.00 | 98.69  | C     |   |
| ANISOU | 300 | C   | PRO | C | 63 | 10530  | 14857  | 12112  | -508 | 1485   | -28   | C |
| ATOM   | 301 | O   | PRO | C | 63 | 51.745 | 21.223 | 15.491 | 1.00 | 88.16  | O     |   |
| ANISOU | 301 | O   | PRO | C | 63 | 9272   | 13316  | 10911  | -708 | 1435   | 55    | O |
| ATOM   | 302 | N   | ARG | C | 64 | 51.016 | 22.953 | 14.276 | 1.00 | 106.21 | N     |   |
| ANISOU | 302 | N   | ARG | C | 64 | 11514  | 15744  | 13095  | -283 | 1479   | -52   | N |
| ATOM   | 303 | CA  | ARG | C | 64 | 52.326 | 23.241 | 13.710 | 1.00 | 102.31 | C     |   |

|        |     |     |     |   |    |        |        |        |            |       |      |   |
|--------|-----|-----|-----|---|----|--------|--------|--------|------------|-------|------|---|
| ANISOU | 303 | CA  | ARG | C | 64 | 11162  | 14918  | 12794  | -251       | 1410  | 20   | C |
| ATOM   | 304 | CB  | ARG | C | 64 | 52.244 | 23.643 | 12.227 | 1.00108.52 |       |      | C |
| ANISOU | 304 | CB  | ARG | C | 64 | 11882  | 15715  | 13635  | -83        | 1423  | -11  | C |
| ATOM   | 305 | CG  | ARG | C | 64 | 51.331 | 24.806 | 11.919 | 1.00104.42 |       |      | C |
| ANISOU | 305 | CG  | ARG | C | 64 | 11311  | 15397  | 12965  | 188        | 1471  | -105 | C |
| ATOM   | 306 | CD  | ARG | C | 64 | 51.477 | 25.250 | 10.484 | 1.00103.68 |       |      | C |
| ANISOU | 306 | CD  | ARG | C | 64 | 11183  | 15258  | 12952  | 350        | 1471  | -121 | C |
| ATOM   | 307 | NE  | ARG | C | 64 | 51.136 | 24.195 | 9.537  | 1.00109.66 |       |      | N |
| ANISOU | 307 | NE  | ARG | C | 64 | 11781  | 16123  | 13760  | 228        | 1500  | -123 | N |
| ATOM   | 308 | CZ  | ARG | C | 64 | 51.142 | 24.351 | 8.216  | 1.00111.73 |       |      | C |
| ANISOU | 308 | CZ  | ARG | C | 64 | 11981  | 16381  | 14090  | 335        | 1508  | -139 | C |
| ATOM   | 309 | NH1 | ARG | C | 64 | 51.473 | 25.523 | 7.688  | 1.00104.94 |       |      | N |
| ANISOU | 309 | NH1 | ARG | C | 64 | 11203  | 15414  | 13256  | 566        | 1488  | -155 | N |
| ATOM   | 310 | NH2 | ARG | C | 64 | 50.818 | 23.336 | 7.427  | 1.00104.53 |       |      | N |
| ANISOU | 310 | NH2 | ARG | C | 64 | 10925  | 15572  | 13221  | 209        | 1536  | -139 | N |
| ATOM   | 311 | C   | ARG | C | 64 | 53.001 | 24.319 | 14.527 | 1.00       | 89.54 |      | C |
| ANISOU | 311 | C   | ARG | C | 64 | 9739   | 13108  | 11175  | -134       | 1363  | 43   | C |
| ATOM   | 312 | O   | ARG | C | 64 | 54.203 | 24.254 | 14.763 | 1.00       | 91.38 |      | O |
| ANISOU | 312 | O   | ARG | C | 64 | 10122  | 13043  | 11555  | -213       | 1294  | 127  | O |
| ATOM   | 313 | N   | ALA | C | 65 | 52.225 | 25.327 | 14.923 | 1.00       | 89.47 |      | N |
| ANISOU | 313 | N   | ALA | C | 65 | 9725   | 13269  | 11000  | 60         | 1400  | -33  | N |
| ATOM   | 314 | CA  | ALA | C | 65 | 52.737 | 26.448 | 15.708 | 1.00       | 92.14 |      | C |
| ANISOU | 314 | CA  | ALA | C | 65 | 10240  | 13454  | 11314  | 194        | 1362  | -22  | C |
| ATOM   | 315 | CB  | ALA | C | 65 | 51.661 | 27.470 | 15.928 | 1.00       | 93.38 |      | C |
| ANISOU | 315 | CB  | ALA | C | 65 | 10349  | 13856  | 11276  | 415        | 1418  | -120 | C |
| ATOM   | 316 | C   | ALA | C | 65 | 53.289 | 25.977 | 17.045 | 1.00       | 93.94 |      | C |
| ANISOU | 316 | C   | ALA | C | 65 | 10578  | 13555  | 11559  | -1         | 1325  | 41   | C |
| ATOM   | 317 | O   | ALA | C | 65 | 54.080 | 26.670 | 17.679 | 1.00       | 93.81 |      | O |
| ANISOU | 317 | O   | ALA | C | 65 | 10737  | 13326  | 11582  | 50         | 1274  | 81   | O |
| ATOM   | 318 | N   | LEU | C | 66 | 52.847 | 24.793 | 17.460 | 1.00       | 97.97 |      | N |
| ANISOU | 318 | N   | LEU | C | 66 | 10983  | 14202  | 12039  | -226       | 1350  | 48   | N |
| ATOM   | 319 | CA  | LEU | C | 66 | 53.309 | 24.133 | 18.680 | 1.00       | 91.55 |      | C |
| ANISOU | 319 | CA  | LEU | C | 66 | 10249  | 13288  | 11246  | -445       | 1318  | 109  | C |
| ATOM   | 320 | CB  | LEU | C | 66 | 52.318 | 23.059 | 19.108 | 1.00       | 94.91 |      | C |
| ANISOU | 320 | CB  | LEU | C | 66 | 10512  | 13987  | 11564  | -626       | 1373  | 77   | C |
| ATOM   | 321 | CG  | LEU | C | 66 | 52.643 | 22.150 | 20.288 | 1.00101.14 |       |      | C |
| ANISOU | 321 | CG  | LEU | C | 66 | 11345  | 14715  | 12369  | -885       | 1348  | 135  | C |
| ATOM   | 322 | CD1 | LEU | C | 66 | 51.466 | 22.027 | 21.231 | 1.00104.26 |       |      | C |
| ANISOU | 322 | CD1 | LEU | C | 66 | 11645  | 15407  | 12561  | -917       | 1407  | 69   | C |
| ATOM   | 323 | CD2 | LEU | C | 66 | 53.086 | 20.777 | 19.781 | 1.00       | 93.79 |      | C |
| ANISOU | 323 | CD2 | LEU | C | 66 | 10349  | 13705  | 11583  | -1123      | 1330  | 198  | C |
| ATOM   | 324 | C   | LEU | C | 66 | 54.693 | 23.522 | 18.430 | 1.00       | 85.90 |      | C |
| ANISOU | 324 | C   | LEU | C | 66 | 9643   | 12242  | 10753  | -602       | 1244  | 217  | C |
| ATOM   | 325 | O   | LEU | C | 66 | 55.582 | 23.576 | 19.285 | 1.00       | 86.15 |      | O |
| ANISOU | 325 | O   | LEU | C | 66 | 9830   | 12051  | 10852  | -687       | 1189  | 285  | O |
| ATOM   | 326 | N   | TRP | C | 67 | 54.862 | 22.975 | 17.228 | 1.00       | 85.72 |      | N |
| ANISOU | 326 | N   | TRP | C | 67 | 9537   | 12190  | 10843  | -632       | 1245  | 231  | N |
| ATOM   | 327 | CA  | TRP | C | 67 | 56.099 | 22.362 | 16.760 | 1.00       | 82.81 |      | C |
| ANISOU | 327 | CA  | TRP | C | 67 | 9248   | 11528  | 10690  | -768       | 1182  | 327  | C |
| ATOM   | 328 | CB  | TRP | C | 67 | 55.860 | 21.681 | 15.411 | 1.00       | 89.74 |      | C |
| ANISOU | 328 | CB  | TRP | C | 67 | 9979   | 12480  | 11639  | -796       | 1207  | 315  | C |
| ATOM   | 329 | CG  | TRP | C | 67 | 57.091 | 21.320 | 14.595 | 1.00       | 86.50 |      | C |
| ANISOU | 329 | CG  | TRP | C | 67 | 9644   | 11771  | 11451  | -863       | 1147  | 399  | C |
| ATOM   | 330 | CD1 | TRP | C | 67 | 57.316 | 21.658 | 13.289 | 1.00       | 84.86 |      | C |
| ANISOU | 330 | CD1 | TRP | C | 67 | 9412   | 11501  | 11331  | -728       | 1143  | 391  | C |
| ATOM   | 331 | NE1 | TRP | C | 67 | 58.507 | 21.134 | 12.856 | 1.00       | 87.24 |      | N |
| ANISOU | 331 | NE1 | TRP | C | 67 | 9795   | 11518  | 11835  | -847       | 1083  | 481  | N |
| ATOM   | 332 | CE2 | TRP | C | 67 | 59.071 | 20.408 | 13.873 | 1.00       | 88.36 |      | C |
| ANISOU | 332 | CE2 | TRP | C | 67 | 10011  | 11534  | 12026  | -1068      | 1048  | 551  | C |
| ATOM   | 333 | CD2 | TRP | C | 67 | 58.199 | 20.489 | 14.985 | 1.00       | 86.95 |      | C |
| ANISOU | 333 | CD2 | TRP | C | 67 | 9798   | 11570  | 11669  | -1087      | 1087  | 502  | C |
| ATOM   | 334 | CE3 | TRP | C | 67 | 58.553 | 19.823 | 16.165 | 1.00       | 83.18 |      | C |
| ANISOU | 334 | CE3 | TRP | C | 67 | 9384   | 11019  | 11203  | -1300      | 1060  | 557  | C |

|        |     |     |     |   |    |        |        |        |       |       |     |   |
|--------|-----|-----|-----|---|----|--------|--------|--------|-------|-------|-----|---|
| ATOM   | 335 | CZ3 | TRP | C | 67 | 59.750 | 19.111 | 16.199 | 1.00  | 83.50 | C   |   |
| ANISOU | 335 | CZ3 | TRP | C | 67 | 9519   | 10776  | 11431  | -1484 | 997   | 659 | C |
| ATOM   | 336 | CH2 | TRP | C | 67 | 60.594 | 19.053 | 15.077 | 1.00  | 88.11 | C   |   |
| ANISOU | 336 | CH2 | TRP | C | 67 | 10135  | 11151  | 12190  | -1457 | 961   | 706 | C |
| ATOM   | 337 | CZ2 | TRP | C | 67 | 60.271 | 19.690 | 13.907 | 1.00  | 84.73 | C   |   |
| ANISOU | 337 | CZ2 | TRP | C | 67 | 9647   | 10792  | 11756  | -1252 | 985   | 653 | C |
| ATOM   | 338 | C   | TRP | C | 67 | 57.155 | 23.433 | 16.640 | 1.00  | 80.74 | C   |   |
| ANISOU | 338 | C   | TRP | C | 67 | 9172   | 10979  | 10526  | -611  | 1120  | 368 | C |
| ATOM   | 339 | O   | TRP | C | 67 | 58.317 | 23.209 | 16.982 | 1.00  | 81.42 | O   |   |
| ANISOU | 339 | O   | TRP | C | 67 | 9399   | 10781  | 10755  | -724  | 1054  | 458 | O |
| ATOM   | 340 | N   | TRP | C | 68 | 56.750 | 24.575 | 16.088 | 1.00  | 81.56 | N   |   |
| ANISOU | 340 | N   | TRP | C | 68 | 9273   | 11159  | 10558  | -349  | 1142  | 303 | N |
| ATOM   | 341 | CA  | TRP | C | 68 | 57.636 | 25.717 | 15.915 | 1.00  | 74.49 | C   |   |
| ANISOU | 341 | CA  | TRP | C | 68 | 8546   | 10019  | 9739   | -168  | 1089  | 331 | C |
| ATOM   | 342 | CB  | TRP | C | 68 | 56.890 | 26.909 | 15.326 | 1.00  | 78.66 | C   |   |
| ANISOU | 342 | CB  | TRP | C | 68 | 9032   | 10707  | 10150  | 120   | 1129  | 241 | C |
| ATOM   | 343 | CG  | TRP | C | 68 | 57.688 | 28.170 | 15.381 | 1.00  | 78.34 | C   |   |
| ANISOU | 343 | CG  | TRP | C | 68 | 9170   | 10440  | 10155  | 312   | 1077  | 262 | C |
| ATOM   | 344 | CD1 | TRP | C | 68 | 58.773 | 28.494 | 14.612 | 1.00  | 76.20 | C   |   |
| ANISOU | 344 | CD1 | TRP | C | 68 | 9005   | 9895   | 10054  | 373   | 1019  | 319 | C |
| ATOM   | 345 | NE1 | TRP | C | 68 | 59.246 | 29.739 | 14.960 | 1.00  | 72.78 | N   |   |
| ANISOU | 345 | NE1 | TRP | C | 68 | 8730   | 9317   | 9607   | 557   | 983   | 322 | N |
| ATOM   | 346 | CE2 | TRP | C | 68 | 58.469 | 30.241 | 15.974 | 1.00  | 82.76 | C   |   |
| ANISOU | 346 | CE2 | TRP | C | 68 | 9994   | 10760  | 10692  | 618   | 1019  | 266 | C |
| ATOM   | 347 | CD2 | TRP | C | 68 | 57.478 | 29.278 | 16.267 | 1.00  | 83.50 | C   |   |
| ANISOU | 347 | CD2 | TRP | C | 68 | 9923   | 11119  | 10683  | 467   | 1079  | 227 | C |
| ATOM   | 348 | CE3 | TRP | C | 68 | 56.546 | 29.551 | 17.277 | 1.00  | 78.04 | C   |   |
| ANISOU | 348 | CE3 | TRP | C | 68 | 9199   | 10652  | 9803   | 494   | 1125  | 166 | C |
| ATOM   | 349 | CZ3 | TRP | C | 68 | 56.630 | 30.755 | 17.947 | 1.00  | 78.56 | C   |   |
| ANISOU | 349 | CZ3 | TRP | C | 68 | 9393   | 10668  | 9789   | 668   | 1111  | 146 | C |
| ATOM   | 350 | CH2 | TRP | C | 68 | 57.628 | 31.693 | 17.633 | 1.00  | 84.39 | C   |   |
| ANISOU | 350 | CH2 | TRP | C | 68 | 10294  | 11138  | 10631  | 815   | 1050  | 186 | C |
| ATOM   | 351 | CZ2 | TRP | C | 68 | 58.557 | 31.453 | 16.654 | 1.00  | 82.93 | C   |   |
| ANISOU | 351 | CZ2 | TRP | C | 68 | 10146  | 10731  | 10632  | 792   | 1003  | 246 | C |
| ATOM   | 352 | C   | TRP | C | 68 | 58.269 | 26.124 | 17.219 | 1.00  | 74.35 | C   |   |
| ANISOU | 352 | C   | TRP | C | 68 | 8703   | 9834   | 9713   | -205  | 1043  | 378 | C |
| ATOM   | 353 | O   | TRP | C | 68 | 59.450 | 26.426 | 17.252 | 1.00  | 80.11 | O   |   |
| ANISOU | 353 | O   | TRP | C | 68 | 9594   | 10264  | 10581  | -204  | 975   | 452 | O |
| ATOM   | 354 | N   | SER | C | 69 | 57.469 | 26.146 | 18.283 | 1.00  | 81.58 | N   |   |
| ANISOU | 354 | N   | SER | C | 69 | 9587   | 10947  | 10464  | -235  | 1081  | 333 | N |
| ATOM   | 355 | CA  | SER | C | 69 | 57.935 | 26.566 | 19.610 | 1.00  | 85.76 | C   |   |
| ANISOU | 355 | CA  | SER | C | 69 | 10274  | 11349  | 10961  | -266  | 1045  | 369 | C |
| ATOM   | 356 | CB  | SER | C | 69 | 56.769 | 26.585 | 20.611 | 1.00  | 80.37 | C   |   |
| ANISOU | 356 | CB  | SER | C | 69 | 9513   | 10954  | 10070  | -276  | 1104  | 298 | C |
| ATOM   | 357 | OG  | SER | C | 69 | 55.648 | 27.287 | 20.093 | 1.00  | 85.13 | O   |   |
| ANISOU | 357 | OG  | SER | C | 69 | 10001  | 11821  | 10525  | -63   | 1168  | 196 | O |
| ATOM   | 358 | C   | SER | C | 69 | 59.044 | 25.651 | 20.140 | 1.00  | 75.22 | C   |   |
| ANISOU | 358 | C   | SER | C | 69 | 9039   | 9759   | 9783   | -518  | 982   | 477 | C |
| ATOM   | 359 | O   | SER | C | 69 | 60.069 | 26.126 | 20.636 | 1.00  | 67.86 | O   |   |
| ANISOU | 359 | O   | SER | C | 69 | 8287   | 8561   | 8935   | -510  | 920   | 542 | O |
| ATOM   | 360 | N   | VAL | C | 70 | 58.833 | 24.342 | 20.018 | 1.00  | 74.35 | N   |   |
| ANISOU | 360 | N   | VAL | C | 70 | 8810   | 9731   | 9710   | -740  | 1000  | 497 | N |
| ATOM   | 361 | CA  | VAL | C | 70 | 59.876 | 23.439 | 20.488 | 1.00  | 75.21 | C   |   |
| ANISOU | 361 | CA  | VAL | C | 70 | 9007   | 9600   | 9971   | -983  | 942   | 600 | C |
| ATOM   | 362 | CB  | VAL | C | 70 | 59.426 | 21.975 | 20.390 | 1.00  | 74.81 | C   |   |
| ANISOU | 362 | CB  | VAL | C | 70 | 8800   | 9694   | 9932   | -1224 | 972   | 607 | C |
| ATOM   | 363 | CG1 | VAL | C | 70 | 60.566 | 21.046 | 20.775 | 1.00  | 72.49 | C   |   |
| ANISOU | 363 | CG1 | VAL | C | 70 | 8599   | 9136   | 9809   | -1470 | 909   | 717 | C |
| ATOM   | 364 | CG2 | VAL | C | 70 | 58.221 | 21.743 | 21.278 | 1.00  | 89.91 | C   |   |
| ANISOU | 364 | CG2 | VAL | C | 70 | 10606  | 11911  | 11646  | -1272 | 1033  | 539 | C |
| ATOM   | 365 | C   | VAL | C | 70 | 61.175 | 23.593 | 19.713 | 1.00  | 76.05 | C   |   |
| ANISOU | 365 | C   | VAL | C | 70 | 9232   | 9381   | 10284  | -960  | 874   | 679 | C |
| ATOM   | 366 | O   | VAL | C | 70 | 62.253 | 23.679 | 20.301 | 1.00  | 78.77 | O   |   |

|        |     |     |     |   |    |        |        |        |       |        |      |   |
|--------|-----|-----|-----|---|----|--------|--------|--------|-------|--------|------|---|
| ANISOU | 366 | O   | VAL | C | 70 | 9741   | 9455   | 10733  | -1032 | 810    | 760  | O |
| ATOM   | 367 | N   | GLU | C | 71 | 61.063 | 23.626 | 18.400 | 1.00  | 82.03  |      | N |
| ANISOU | 367 | N   | GLU | C | 71 | 9904   | 10167  | 11097  | -862  | 890    | 655  | N |
| ATOM   | 368 | CA  | GLU | C | 71 | 62.277 | 23.730 | 17.602 | 1.00  | 80.21  |      | C |
| ANISOU | 368 | CA  | GLU | C | 71 | 9778   | 9634   | 11065  | -843  | 827    | 728  | C |
| ATOM   | 369 | CB  | GLU | C | 71 | 62.026 | 23.358 | 16.138 | 1.00  | 76.09  |      | C |
| ANISOU | 369 | CB  | GLU | C | 71 | 9119   | 9183   | 10607  | -804  | 854    | 703  | C |
| ATOM   | 370 | CG  | GLU | C | 71 | 61.369 | 24.436 | 15.314 | 1.00  | 75.82  |      | C |
| ANISOU | 370 | CG  | GLU | C | 71 | 9034   | 9291   | 10484  | -525  | 891    | 618  | C |
| ATOM   | 371 | CD  | GLU | C | 71 | 61.392 | 24.104 | 13.828 | 1.00  | 89.77  |      | C |
| ANISOU | 371 | CD  | GLU | C | 71 | 10697  | 11061  | 12350  | -491  | 902    | 611  | C |
| ATOM   | 372 | OE1 | GLU | C | 71 | 61.708 | 24.987 | 12.991 | 1.00  | 108.62 |      | O |
| ANISOU | 372 | OE1 | GLU | C | 71 | 13132  | 13353  | 14786  | -290  | 885    | 599  | O |
| ATOM   | 373 | OE2 | GLU | C | 71 | 61.103 | 22.939 | 13.495 | 1.00  | 89.67  |      | O |
| ANISOU | 373 | OE2 | GLU | C | 71 | 10557  | 11144  | 12370  | -669  | 926    | 618  | O |
| ATOM   | 374 | C   | GLU | C | 71 | 62.812 | 25.149 | 17.707 | 1.00  | 77.66  |      | C |
| ANISOU | 374 | C   | GLU | C | 71 | 9618   | 9149   | 10742  | -615  | 790    | 729  | C |
| ATOM   | 375 | O   | GLU | C | 71 | 63.913 | 25.440 | 17.248 | 1.00  | 86.42  |      | O |
| ANISOU | 375 | O   | GLU | C | 71 | 10849  | 9980   | 12006  | -581  | 729    | 795  | O |
| ATOM   | 376 | N   | THR | C | 72 | 62.030 | 26.038 | 18.309 | 1.00  | 72.68  |      | N |
| ANISOU | 376 | N   | THR | C | 72 | 8989   | 8691   | 9935   | -459  | 825    | 657  | N |
| ATOM   | 377 | CA  | THR | C | 72 | 62.501 | 27.394 | 18.517 | 1.00  | 71.94  |      | C |
| ANISOU | 377 | CA  | THR | C | 72 | 9053   | 8451   | 9829   | -246  | 790    | 657  | C |
| ATOM   | 378 | CB  | THR | C | 72 | 61.415 | 28.440 | 18.260 | 1.00  | 73.24  |      | C |
| ANISOU | 378 | CB  | THR | C | 72 | 9147   | 8862   | 9820   | 10    | 847    | 548  | C |
| ATOM   | 379 | OG1 | THR | C | 72 | 61.050 | 28.411 | 16.876 | 1.00  | 74.60  |      | O |
| ANISOU | 379 | OG1 | THR | C | 72 | 9195   | 9128   | 10024  | 111   | 877    | 506  | O |
| ATOM   | 380 | CG2 | THR | C | 72 | 61.913 | 29.826 | 18.615 | 1.00  | 79.66  |      | C |
| ANISOU | 380 | CG2 | THR | C | 72 | 10132  | 9520   | 10614  | 217   | 809    | 550  | C |
| ATOM   | 381 | C   | THR | C | 72 | 63.036 | 27.522 | 19.941 | 1.00  | 78.90  |      | C |
| ANISOU | 381 | C   | THR | C | 72 | 10089  | 9195   | 10695  | -342  | 750    | 709  | C |
| ATOM   | 382 | O   | THR | C | 72 | 64.065 | 28.161 | 20.158 | 1.00  | 78.21  |      | O |
| ANISOU | 382 | O   | THR | C | 72 | 10178  | 8839   | 10700  | -287  | 687    | 769  | O |
| ATOM   | 383 | N   | ALA | C | 73 | 62.388 | 26.866 | 20.881 | 1.00  | 79.94  |      | N |
| ANISOU | 383 | N   | ALA | C | 73 | 10154  | 9500   | 10720  | -496  | 784    | 691  | N |
| ATOM   | 384 | CA  | ALA | C | 73 | 62.801 | 26.899 | 22.265 | 1.00  | 83.01  |      | C |
| ANISOU | 384 | CA  | ALA | C | 73 | 10673  | 9783   | 11084  | -602  | 751    | 737  | C |
| ATOM   | 385 | CB  | ALA | C | 73 | 61.807 | 26.146 | 23.108 | 1.00  | 76.33  |      | C |
| ANISOU | 385 | CB  | ALA | C | 73 | 9707   | 9199   | 10096  | -752  | 805    | 695  | C |
| ATOM   | 386 | C   | ALA | C | 73 | 64.165 | 26.320 | 22.488 | 1.00  | 77.62  |      | C |
| ANISOU | 386 | C   | ALA | C | 73 | 10123  | 8776   | 10595  | -785  | 676    | 855  | C |
| ATOM   | 387 | O   | ALA | C | 73 | 64.904 | 26.791 | 23.305 | 1.00  | 76.66  |      | O |
| ANISOU | 387 | O   | ALA | C | 73 | 10167  | 8459   | 10501  | -789  | 626    | 906  | O |
| ATOM   | 388 | N   | THR | C | 74 | 64.486 | 25.264 | 21.784 | 1.00  | 74.58  |      | N |
| ANISOU | 388 | N   | THR | C | 74 | 9113   | 7406   | 11817  | -809  | -1505  | -602 | N |
| ATOM   | 389 | CA  | THR | C | 74 | 65.752 | 24.610 | 21.956 | 1.00  | 76.14  |      | C |
| ANISOU | 389 | CA  | THR | C | 74 | 9238   | 7383   | 12309  | -1033 | -1462  | -483 | C |
| ATOM   | 390 | CB  | THR | C | 74 | 65.589 | 23.217 | 21.463 | 1.00  | 80.78  |      | C |
| ANISOU | 390 | CB  | THR | C | 74 | 9630   | 8083   | 12978  | -1158 | -1371  | -487 | C |
| ATOM   | 391 | OG1 | THR | C | 74 | 65.154 | 23.298 | 20.117 | 1.00  | 83.39  |      | O |
| ANISOU | 391 | OG1 | THR | C | 74 | 10015  | 8461   | 13208  | -1036 | -1276  | -537 | O |
| ATOM   | 392 | CG2 | THR | C | 74 | 64.504 | 22.574 | 22.237 | 1.00  | 77.13  |      | C |
| ANISOU | 392 | CG2 | THR | C | 74 | 9012   | 7919   | 12374  | -1154 | -1435  | -569 | C |
| ATOM   | 393 | C   | THR | C | 74 | 66.831 | 25.245 | 21.124 | 1.00  | 80.56  |      | C |
| ANISOU | 393 | C   | THR | C | 74 | 9954   | 7645   | 13011  | -1035 | -1394  | -401 | C |
| ATOM   | 394 | O   | THR | C | 74 | 67.975 | 24.858 | 21.186 | 1.00  | 69.96  |      | O |
| ANISOU | 394 | O   | THR | C | 74 | 8580   | 6085   | 11916  | -1209 | -1356  | -295 | O |
| ATOM   | 395 | N   | THR | C | 75 | 66.439 | 26.228 | 20.336 | 1.00  | 80.55  |      | N |
| ANISOU | 395 | N   | THR | C | 75 | 10121  | 7638   | 12846  | -837  | -1379  | -452 | N |
| ATOM   | 396 | CA  | THR | C | 75 | 67.316 | 26.975 | 19.422 | 1.00  | 77.43  |      | C |
| ANISOU | 396 | CA  | THR | C | 75 | 9896   | 6979   | 12545  | -798  | -1314  | -390 | C |
| ATOM   | 397 | CB  | THR | C | 75 | 68.579 | 27.596 | 20.125 | 1.00  | 81.70  |      | C |
| ANISOU | 397 | CB  | THR | C | 75 | 10535  | 7229   | 13278  | -894  | -1366  | -278 | C |



|        |     |     |     |   |    |        |        |        |       |       |      |   |
|--------|-----|-----|-----|---|----|--------|--------|--------|-------|-------|------|---|
| ATOM   | 398 | OG1 | THR | C | 75 | 69.508 | 26.572 | 20.515 | 1.00  | 82.14 | O    |   |
| ANISOU | 398 | OG1 | THR | C | 75 | 10446  | 7165   | 13598  | -1137 | -1333 | -182 | O |
| ATOM   | 399 | CG2 | THR | C | 75 | 68.158 | 28.392 | 21.368 | 1.00  | 82.29 | C    |   |
| ANISOU | 399 | CG2 | THR | C | 75 | 10670  | 7377   | 13220  | -813  | -1509 | -313 | C |
| ATOM   | 400 | C   | THR | C | 75 | 67.765 | 26.161 | 18.198 | 1.00  | 79.15 | C    |   |
| ANISOU | 400 | C   | THR | C | 75 | 10051  | 7119   | 12904  | -885  | -1171 | -352 | C |
| ATOM   | 401 | O   | THR | C | 75 | 68.759 | 26.494 | 17.556 | 1.00  | 88.13 | O    |   |
| ANISOU | 401 | O   | THR | C | 75 | 11289  | 8003   | 14195  | -921  | -1108 | -272 | O |
| ATOM   | 402 | N   | VAL | C | 76 | 67.016 | 25.114 | 17.852 | 1.00  | 78.48 | N    |   |
| ANISOU | 402 | N   | VAL | C | 76 | 9803   | 7253   | 12762  | -912  | -1119 | -411 | N |
| ATOM   | 403 | CA  | VAL | C | 76 | 67.372 | 24.300 | 16.682 | 1.00  | 84.21 | C    |   |
| ANISOU | 403 | CA  | VAL | C | 76 | 10462  | 7923   | 13612  | -991  | -983  | -381 | C |
| ATOM   | 404 | CB  | VAL | C | 76 | 66.588 | 22.966 | 16.665 | 1.00  | 79.79 | C    |   |
| ANISOU | 404 | CB  | VAL | C | 76 | 9681   | 7619   | 13016  | -1064 | -948  | -437 | C |
| ATOM   | 405 | CG1 | VAL | C | 76 | 66.860 | 22.196 | 15.357 | 1.00  | 71.62 | C    |   |
| ANISOU | 405 | CG1 | VAL | C | 76 | 8588   | 6538   | 12085  | -1121 | -805  | -417 | C |
| ATOM   | 406 | CG2 | VAL | C | 76 | 67.025 | 22.112 | 17.850 | 1.00  | 84.57 | C    |   |
| ANISOU | 406 | CG2 | VAL | C | 76 | 10123  | 8223   | 13787  | -1271 | -999  | -380 | C |
| ATOM   | 407 | C   | VAL | C | 76 | 67.099 | 25.095 | 15.399 | 1.00  | 88.58 | C    |   |
| ANISOU | 407 | C   | VAL | C | 76 | 11178  | 8444   | 14036  | -804  | -917  | -424 | C |
| ATOM   | 408 | O   | VAL | C | 76 | 67.982 | 25.240 | 14.550 | 1.00  | 95.14 | O    |   |
| ANISOU | 408 | O   | VAL | C | 76 | 12085  | 9051   | 15011  | -840  | -832  | -354 | O |
| ATOM   | 409 | N   | GLY | C | 77 | 65.879 | 25.621 | 15.271 | 1.00  | 89.22 | N    |   |
| ANISOU | 409 | N   | GLY | C | 77 | 11312  | 8746   | 13843  | -603  | -957  | -539 | N |
| ATOM   | 410 | CA  | GLY | C | 77 | 65.519 | 26.437 | 14.118 | 1.00  | 87.13 | C    |   |
| ANISOU | 410 | CA  | GLY | C | 77 | 11204  | 8469   | 13431  | -410  | -904  | -588 | C |
| ATOM   | 411 | C   | GLY | C | 77 | 65.755 | 25.897 | 12.714 | 1.00  | 90.17 | C    |   |
| ANISOU | 411 | C   | GLY | C | 77 | 11569  | 8799   | 13893  | -431  | -763  | -574 | C |
| ATOM   | 412 | O   | GLY | C | 77 | 66.492 | 26.502 | 11.919 | 1.00  | 97.68 | O    |   |
| ANISOU | 412 | O   | GLY | C | 77 | 12659  | 9530   | 14924  | -400  | -705  | -521 | O |
| ATOM   | 413 | N   | TYR | C | 78 | 65.099 | 24.782 | 12.391 | 1.00  | 90.92 | N    |   |
| ANISOU | 413 | N   | TYR | C | 78 | 11493  | 9097   | 13955  | -477  | -708  | -624 | N |
| ATOM   | 414 | CA  | TYR | C | 78 | 65.233 | 24.162 | 11.077 | 1.00  | 76.34 | C    |   |
| ANISOU | 414 | CA  | TYR | C | 78 | 9608   | 7225   | 12173  | -500  | -574  | -617 | C |
| ATOM   | 415 | CB  | TYR | C | 78 | 64.284 | 22.965 | 10.946 | 1.00  | 68.92 | C    |   |
| ANISOU | 415 | CB  | TYR | C | 78 | 8470   | 6562   | 11155  | -533  | -540  | -690 | C |
| ATOM   | 416 | CG  | TYR | C | 78 | 64.613 | 21.800 | 11.850 | 1.00  | 70.78 | C    |   |
| ANISOU | 416 | CG  | TYR | C | 78 | 8503   | 6832   | 11557  | -751  | -560  | -641 | C |
| ATOM   | 417 | CD1 | TYR | C | 78 | 65.845 | 21.152 | 11.766 | 1.00  | 71.02 | C    |   |
| ANISOU | 417 | CD1 | TYR | C | 78 | 8470   | 6642   | 11872  | -957  | -498  | -527 | C |
| ATOM   | 418 | CE1 | TYR | C | 78 | 66.125 | 20.026 | 12.555 | 1.00  | 74.78 | C    |   |
| ANISOU | 418 | CE1 | TYR | C | 78 | 8753   | 7157   | 12503  | -1160 | -511  | -484 | C |
| ATOM   | 419 | CZ  | TYR | C | 78 | 65.157 | 19.556 | 13.433 | 1.00  | 67.92 | C    |   |
| ANISOU | 419 | CZ  | TYR | C | 78 | 7754   | 6551   | 11501  | -1154 | -588  | -557 | C |
| ATOM   | 420 | OH  | TYR | C | 78 | 65.383 | 18.435 | 14.190 | 1.00  | 66.96 | O    |   |
| ANISOU | 420 | OH  | TYR | C | 78 | 7438   | 6480   | 11524  | -1349 | -601  | -519 | O |
| ATOM   | 421 | CE2 | TYR | C | 78 | 63.929 | 20.193 | 13.537 | 1.00  | 69.34 | C    |   |
| ANISOU | 421 | CE2 | TYR | C | 78 | 7995   | 6952   | 11399  | -950  | -651  | -670 | C |
| ATOM   | 422 | CD2 | TYR | C | 78 | 63.663 | 21.307 | 12.749 | 1.00  | 76.76 | C    |   |
| ANISOU | 422 | CD2 | TYR | C | 78 | 9127   | 7850   | 12187  | -750  | -637  | -712 | C |
| ATOM   | 423 | C   | TYR | C | 78 | 64.947 | 25.114 | 9.924  | 1.00  | 71.10 | C    |   |
| ANISOU | 423 | C   | TYR | C | 78 | 9125   | 6525   | 11366  | -300  | -525  | -662 | C |
| ATOM   | 424 | O   | TYR | C | 78 | 65.625 | 25.079 | 8.912  | 1.00  | 69.48 | O    |   |
| ANISOU | 424 | O   | TYR | C | 78 | 8969   | 6149   | 11280  | -327  | -425  | -610 | O |
| ATOM   | 425 | N   | GLY | C | 79 | 63.958 | 25.957 | 10.125 | 1.00  | 73.53 | N    |   |
| ANISOU | 425 | N   | GLY | C | 79 | 9526   | 6992   | 11420  | -103  | -598  | -756 | N |
| ATOM   | 426 | CA  | GLY | C | 79 | 63.538 | 26.889 | 9.112  | 1.00  | 76.93 | C    |   |
| ANISOU | 426 | CA  | GLY | C | 79 | 10124  | 7420   | 11685  | 101   | -562  | -811 | C |
| ATOM   | 427 | C   | GLY | C | 79 | 62.309 | 26.488 | 8.340  | 1.00  | 78.40 | C    |   |
| ANISOU | 427 | C   | GLY | C | 79 | 10251  | 7870   | 11668  | 224   | -513  | -923 | C |
| ATOM   | 428 | O   | GLY | C | 79 | 61.964 | 27.133 | 7.382  | 1.00  | 73.19 | O    |   |
| ANISOU | 428 | O   | GLY | C | 79 | 9716   | 7212   | 10881  | 384   | -468  | -968 | O |
| ATOM   | 429 | N   | ASP | C | 80 | 61.657 | 25.411 | 8.736  | 1.00  | 83.41 | N    |   |

|        |     |     |     |   |    |        |        |        |      |       |       |   |
|--------|-----|-----|-----|---|----|--------|--------|--------|------|-------|-------|---|
| ANISOU | 429 | N   | ASP | C | 80 | 10693  | 8724   | 12273  | 148  | -518  | -966  | N |
| ATOM   | 430 | CA  | ASP | C | 80 | 60.435 | 24.991 | 8.082  | 1.00 | 75.35 |       | C |
| ANISOU | 430 | CA  | ASP | C | 80 | 9606   | 7969   | 11053  | 263  | -478  | -1075 | C |
| ATOM   | 431 | CB  | ASP | C | 80 | 60.054 | 23.585 | 8.472  | 1.00 | 71.89 |       | C |
| ANISOU | 431 | CB  | ASP | C | 80 | 8933   | 7716   | 10665  | 120  | -464  | -1090 | C |
| ATOM   | 432 | CG  | ASP | C | 80 | 59.897 | 23.419 | 9.924  | 1.00 | 77.95 |       | C |
| ANISOU | 432 | CG  | ASP | C | 80 | 9615   | 8571   | 11431  | 46   | -580  | -1090 | C |
| ATOM   | 433 | OD1 | ASP | C | 80 | 60.513 | 24.159 | 10.677 | 1.00 | 81.64 |       | O |
| ANISOU | 433 | OD1 | ASP | C | 80 | 10179  | 8882   | 11959  | 29   | -655  | -1037 | O |
| ATOM   | 434 | OD2 | ASP | C | 80 | 59.164 | 22.526 | 10.331 | 1.00 | 77.39 |       | O |
| ANISOU | 434 | OD2 | ASP | C | 80 | 9376   | 8726   | 11302  | 1    | -596  | -1141 | O |
| ATOM   | 435 | C   | ASP | C | 80 | 59.292 | 25.926 | 8.385  | 1.00 | 72.69 |       | C |
| ANISOU | 435 | C   | ASP | C | 80 | 9369   | 7820   | 10428  | 480  | -566  | -1183 | C |
| ATOM   | 436 | O   | ASP | C | 80 | 58.351 | 26.029 | 7.624  | 1.00 | 70.37 |       | O |
| ANISOU | 436 | O   | ASP | C | 80 | 9098   | 7695   | 9943   | 631  | -531  | -1273 | O |
| ATOM   | 437 | N   | LEU | C | 81 | 59.381 | 26.586 | 9.529  | 1.00 | 78.42 |       | N |
| ANISOU | 437 | N   | LEU | C | 81 | 10152  | 8519   | 11126  | 492  | -683  | -1172 | N |
| ATOM   | 438 | CA  | LEU | C | 81 | 58.340 | 27.482 | 10.031 | 1.00 | 74.15 |       | C |
| ANISOU | 438 | CA  | LEU | C | 81 | 9700   | 8152   | 10320  | 685  | -784  | -1268 | C |
| ATOM   | 439 | CB  | LEU | C | 81 | 57.359 | 26.733 | 10.941 | 1.00 | 73.35 |       | C |
| ANISOU | 439 | CB  | LEU | C | 81 | 9429   | 8334   | 10106  | 658  | -852  | -1338 | C |
| ATOM   | 440 | CG  | LEU | C | 81 | 56.516 | 25.598 | 10.347 | 1.00 | 74.47 |       | C |
| ANISOU | 440 | CG  | LEU | C | 81 | 9405   | 8711   | 10181  | 645  | -780  | -1405 | C |
| ATOM   | 441 | CD1 | LEU | C | 81 | 56.110 | 24.620 | 11.436 | 1.00 | 74.19 |       | C |
| ANISOU | 441 | CD1 | LEU | C | 81 | 9170   | 8857   | 10161  | 522  | -840  | -1420 | C |
| ATOM   | 442 | CD2 | LEU | C | 81 | 55.307 | 26.119 | 9.580  | 1.00 | 89.89 |       | C |
| ANISOU | 442 | CD2 | LEU | C | 81 | 11437  | 10859  | 11858  | 873  | -766  | -1523 | C |
| ATOM   | 443 | C   | LEU | C | 81 | 58.986 | 28.646 | 10.784 | 1.00 | 68.79 |       | C |
| ANISOU | 443 | C   | LEU | C | 81 | 9181   | 7284   | 9672   | 715  | -876  | -1217 | C |
| ATOM   | 444 | O   | LEU | C | 81 | 60.023 | 28.455 | 11.417 | 1.00 | 75.87 |       | O |
| ANISOU | 444 | O   | LEU | C | 81 | 10050  | 7994   | 10784  | 551  | -896  | -1118 | O |
| ATOM   | 445 | N   | TYR | C | 82 | 58.404 | 29.842 | 10.675 | 1.00 | 68.26 |       | N |
| ANISOU | 445 | N   | TYR | C | 82 | 9283   | 7258   | 9396   | 923  | -929  | -1282 | N |
| ATOM   | 446 | CA  | TYR | C | 82 | 58.891 | 31.037 | 11.373 | 1.00 | 73.52 |       | C |
| ANISOU | 446 | CA  | TYR | C | 82 | 10111  | 7764   | 10061  | 977  | -1022 | -1246 | C |
| ATOM   | 447 | CB  | TYR | C | 82 | 60.326 | 31.369 | 10.932 | 1.00 | 72.27 |       | C |
| ANISOU | 447 | CB  | TYR | C | 82 | 10052  | 7268   | 10139  | 884  | -966  | -1126 | C |
| ATOM   | 448 | CG  | TYR | C | 82 | 60.522 | 31.458 | 9.439  | 1.00 | 79.15 |       | C |
| ANISOU | 448 | CG  | TYR | C | 82 | 10998  | 8048   | 11027  | 946  | -842  | -1123 | C |
| ATOM   | 449 | CD1 | TYR | C | 82 | 60.256 | 32.633 | 8.746  | 1.00 | 78.93 |       | C |
| ANISOU | 449 | CD1 | TYR | C | 82 | 11164  | 7979   | 10847  | 1145 | -839  | -1164 | C |
| ATOM   | 450 | CE1 | TYR | C | 82 | 60.444 | 32.707 | 7.367  | 1.00 | 87.85 |       | C |
| ANISOU | 450 | CE1 | TYR | C | 82 | 12361  | 9024   | 11993  | 1201 | -725  | -1160 | C |
| ATOM   | 451 | CZ  | TYR | C | 82 | 60.889 | 31.595 | 6.673  | 1.00 | 86.48 |       | C |
| ANISOU | 451 | CZ  | TYR | C | 82 | 12061  | 8809   | 11989  | 1057 | -613  | -1115 | C |
| ATOM   | 452 | OH  | TYR | C | 82 | 61.070 | 31.652 | 5.312  | 1.00 | 89.36 |       | O |
| ANISOU | 452 | OH  | TYR | C | 82 | 12490  | 9092   | 12371  | 1111 | -500  | -1111 | O |
| ATOM   | 453 | CE2 | TYR | C | 82 | 61.148 | 30.418 | 7.339  | 1.00 | 80.17 |       | C |
| ANISOU | 453 | CE2 | TYR | C | 82 | 11069  | 8051   | 11340  | 859  | -615  | -1074 | C |
| ATOM   | 454 | CD2 | TYR | C | 82 | 60.966 | 30.354 | 8.714  | 1.00 | 84.56 |       | C |
| ANISOU | 454 | CD2 | TYR | C | 82 | 11559  | 8691   | 11880  | 804  | -729  | -1078 | C |
| ATOM   | 455 | C   | TYR | C | 82 | 57.963 | 32.243 | 11.164 | 1.00 | 77.68 |       | C |
| ANISOU | 455 | C   | TYR | C | 82 | 10802  | 8402   | 10312  | 1227 | -1075 | -1343 | C |
| ATOM   | 456 | O   | TYR | C | 82 | 57.231 | 32.301 | 10.186 | 1.00 | 79.58 |       | O |
| ANISOU | 456 | O   | TYR | C | 82 | 11072  | 8763   | 10403  | 1359 | -1014 | -1416 | O |
| ATOM   | 457 | N   | PRO | C | 83 | 58.009 | 33.227 | 12.077 | 1.00 | 84.32 |       | N |
| ANISOU | 457 | N   | PRO | C | 83 | 11755  | 9196   | 11088  | 1294 | -1189 | -1341 | N |
| ATOM   | 458 | CA  | PRO | C | 83 | 57.167 | 34.423 | 11.981 | 1.00 | 87.16 |       | C |
| ANISOU | 458 | CA  | PRO | C | 83 | 12275  | 9652   | 11190  | 1528 | -1249 | -1429 | C |
| ATOM   | 459 | CB  | PRO | C | 83 | 57.342 | 35.048 | 13.365 | 1.00 | 88.39 |       | C |
| ANISOU | 459 | CB  | PRO | C | 83 | 12473  | 9771   | 11339  | 1517 | -1384 | -1409 | C |
| ATOM   | 460 | CG  | PRO | C | 83 | 58.764 | 34.745 | 13.663 | 1.00 | 85.64 |       | C |
| ANISOU | 460 | CG  | PRO | C | 83 | 12103  | 9151   | 11285  | 1316 | -1363 | -1277 | C |

|        |     |     |     |   |    |        |        |        |      |        |       |   |
|--------|-----|-----|-----|---|----|--------|--------|--------|------|--------|-------|---|
| ATOM   | 461 | CD  | PRO | C | 83 | 58.806 | 33.273 | 13.316 | 1.00 | 85.48  | C     |   |
| ANISOU | 461 | CD  | PRO | C | 83 | 11880  | 9209   | 11391  | 1155 | -1273  | -1261 | C |
| ATOM   | 462 | C   | PRO | C | 83 | 57.577 | 35.414 | 10.889 | 1.00 | 87.13  | C     |   |
| ANISOU | 462 | C   | PRO | C | 83 | 12468  | 9465   | 11174  | 1652 | -1190  | -1413 | C |
| ATOM   | 463 | O   | PRO | C | 83 | 58.759 | 35.597 | 10.594 | 1.00 | 84.01  | O     |   |
| ANISOU | 463 | O   | PRO | C | 83 | 12138  | 8799   | 10982  | 1563 | -1146  | -1313 | O |
| ATOM   | 464 | N   | VAL | C | 84 | 56.574 | 36.045 | 10.287 | 1.00 | 94.43  | N     |   |
| ANISOU | 464 | N   | VAL | C | 84 | 13485  | 10541  | 11853  | 1861 | -1190  | -1514 | N |
| ATOM   | 465 | CA  | VAL | C | 84 | 56.788 | 37.070 | 9.267  | 1.00 | 102.52 | C     |   |
| ANISOU | 465 | CA  | VAL | C | 84 | 14703  | 11424  | 12826  | 2006 | -1143  | -1515 | C |
| ATOM   | 466 | CB  | VAL | C | 84 | 56.097 | 36.706 | 7.931  | 1.00 | 85.98  | C     |   |
| ANISOU | 466 | CB  | VAL | C | 84 | 12589  | 9458   | 10620  | 2101 | -1034  | -1583 | C |
| ATOM   | 467 | CG1 | VAL | C | 84 | 56.732 | 35.469 | 7.329  | 1.00 | 76.86  | C     |   |
| ANISOU | 467 | CG1 | VAL | C | 84 | 11291  | 8232   | 9680   | 1918 | -920   | -1519 | C |
| ATOM   | 468 | CG2 | VAL | C | 84 | 54.622 | 36.494 | 8.145  | 1.00 | 89.97  | C     |   |
| ANISOU | 468 | CG2 | VAL | C | 84 | 13022  | 10293  | 10869  | 2221 | -1077  | -1709 | C |
| ATOM   | 469 | C   | VAL | C | 84 | 56.278 | 38.429 | 9.764  | 1.00 | 102.60 | C     |   |
| ANISOU | 469 | C   | VAL | C | 84 | 14881  | 11468  | 12633  | 2195 | -1252  | -1570 | C |
| ATOM   | 470 | O   | VAL | C | 84 | 56.558 | 39.470 | 9.166  | 1.00 | 99.45  | O     |   |
| ANISOU | 470 | O   | VAL | C | 84 | 14664  | 10926  | 12198  | 2315 | -1239  | -1562 | O |
| ATOM   | 471 | N   | THR | C | 85 | 55.510 | 38.407 | 10.851 | 1.00 | 99.81  | N     |   |
| ANISOU | 471 | N   | THR | C | 85 | 14467  | 11311  | 12147  | 2222 | -1358  | -1629 | N |
| ATOM   | 472 | CA  | THR | C | 85 | 54.959 | 39.629 | 11.438 | 1.00 | 103.21 | C     |   |
| ANISOU | 472 | CA  | THR | C | 85 | 15041  | 11795  | 12379  | 2395 | -1469  | -1686 | C |
| ATOM   | 473 | CB  | THR | C | 85 | 53.509 | 39.406 | 11.886 | 1.00 | 104.66 | C     |   |
| ANISOU | 473 | CB  | THR | C | 85 | 15142  | 12311  | 12312  | 2501 | -1530  | -1808 | C |
| ATOM   | 474 | OG1 | THR | C | 85 | 53.459 | 38.345 | 12.848 | 1.00 | 109.61 | O     |   |
| ANISOU | 474 | OG1 | THR | C | 85 | 15576  | 13046  | 13024  | 2338 | -1567  | -1792 | O |
| ATOM   | 475 | CG2 | THR | C | 85 | 52.649 | 39.036 | 10.696 | 1.00 | 105.40 | C     |   |
| ANISOU | 475 | CG2 | THR | C | 85 | 15207  | 12573  | 12266  | 2604 | -1436  | -1890 | C |
| ATOM   | 476 | C   | THR | C | 85 | 55.761 | 40.171 | 12.630 | 1.00 | 110.53 | C     |   |
| ANISOU | 476 | C   | THR | C | 85 | 16020  | 12554  | 13421  | 2318 | -1572  | -1611 | C |
| ATOM   | 477 | O   | THR | C | 85 | 56.439 | 39.415 | 13.333 | 1.00 | 112.21 | O     |   |
| ANISOU | 477 | O   | THR | C | 85 | 16112  | 12695  | 13829  | 2125 | -1583  | -1537 | O |
| ATOM   | 478 | N   | LEU | C | 86 | 55.651 | 41.483 | 12.858 | 1.00 | 113.86 | N     |   |
| ANISOU | 478 | N   | LEU | C | 86 | 16623  | 12922  | 13718  | 2472 | -1648  | -1633 | N |
| ATOM   | 479 | CA  | LEU | C | 86 | 56.382 | 42.176 | 13.930 | 1.00 | 114.33 | C     |   |
| ANISOU | 479 | CA  | LEU | C | 86 | 16759  | 12814  | 13866  | 2427 | -1749  | -1567 | C |
| ATOM   | 480 | CB  | LEU | C | 86 | 56.188 | 43.695 | 13.814 | 1.00 | 115.39 | C     |   |
| ANISOU | 480 | CB  | LEU | C | 86 | 17114  | 12888  | 13841  | 2630 | -1808  | -1602 | C |
| ATOM   | 481 | CG  | LEU | C | 86 | 57.338 | 44.573 | 14.313 | 1.00 | 116.80 | C     |   |
| ANISOU | 481 | CG  | LEU | C | 86 | 17427  | 12782  | 14168  | 2589 | -1861  | -1505 | C |
| ATOM   | 482 | CD1 | LEU | C | 86 | 58.634 | 44.121 | 13.669 | 1.00 | 121.08 | C     |   |
| ANISOU | 482 | CD1 | LEU | C | 86 | 17958  | 13060  | 14986  | 2431 | -1760  | -1390 | C |
| ATOM   | 483 | CD2 | LEU | C | 86 | 57.088 | 46.047 | 14.012 | 1.00 | 120.90 | C     |   |
| ANISOU | 483 | CD2 | LEU | C | 86 | 18165  | 13250  | 14520  | 2802 | -1906  | -1546 | C |
| ATOM   | 484 | C   | LEU | C | 86 | 55.966 | 41.707 | 15.321 | 1.00 | 104.07 | C     |   |
| ANISOU | 484 | C   | LEU | C | 86 | 15329  | 11674  | 12538  | 2351 | -1853  | -1587 | C |
| ATOM   | 485 | O   | LEU | C | 86 | 56.695 | 41.888 | 16.287 | 1.00 | 103.86 | O     |   |
| ANISOU | 485 | O   | LEU | C | 86 | 15309  | 11511  | 12641  | 2251 | -1924  | -1517 | O |
| ATOM   | 486 | N   | TRP | C | 87 | 54.785 | 41.114 | 15.404 | 1.00 | 102.10 | N     |   |
| ANISOU | 486 | N   | TRP | C | 87 | 14962  | 11714  | 12115  | 2402 | -1862  | -1684 | N |
| ATOM   | 487 | CA  | TRP | C | 87 | 54.271 | 40.541 | 16.637 | 1.00 | 99.48  | C     |   |
| ANISOU | 487 | CA  | TRP | C | 87 | 14489  | 11566  | 11744  | 2332 | -1951  | -1713 | C |
| ATOM   | 488 | CB  | TRP | C | 87 | 52.758 | 40.688 | 16.720 | 1.00 | 107.82 | C     |   |
| ANISOU | 488 | CB  | TRP | C | 87 | 15529  | 12934  | 12505  | 2505 | -1999  | -1847 | C |
| ATOM   | 489 | CG  | TRP | C | 87 | 52.382 | 42.007 | 17.302 | 1.00 | 126.23 | C     |   |
| ANISOU | 489 | CG  | TRP | C | 87 | 18023  | 15277  | 14662  | 2672 | -2111  | -1890 | C |
| ATOM   | 490 | CD1 | TRP | C | 87 | 52.089 | 43.160 | 16.633 | 1.00 | 131.80 | C     |   |
| ANISOU | 490 | CD1 | TRP | C | 87 | 18915  | 15949  | 15213  | 2868 | -2111  | -1935 | C |
| ATOM   | 491 | NE1 | TRP | C | 87 | 51.800 | 44.163 | 17.535 | 1.00 | 129.10 | N     |   |
| ANISOU | 491 | NE1 | TRP | C | 87 | 18678  | 15631  | 14742  | 2974 | -2235  | -1965 | N |
| ATOM   | 492 | CE2 | TRP | C | 87 | 51.889 | 43.665 | 18.795 | 1.00 | 131.74 | C     |   |

|        |     |     |     |   |    |        |        |        |            |       |       |   |
|--------|-----|-----|-----|---|----|--------|--------|--------|------------|-------|-------|---|
| ANISOU | 492 | CE2 | TRP | C | 87 | 18895  | 16018  | 15144  | 2849       | -2316 | -1940 | C |
| ATOM   | 493 | CD2 | TRP | C | 87 | 52.250 | 42.304 | 18.702 | 1.00128.92 |       |       | C |
| ANISOU | 493 | CD2 | TRP | C | 87 | 18351  | 15670  | 14964  | 2656       | -2242 | -1894 | C |
| ATOM   | 494 | CE3 | TRP | C | 87 | 52.408 | 41.552 | 19.864 | 1.00128.24 |       |       | C |
| ANISOU | 494 | CE3 | TRP | C | 87 | 18113  | 15634  | 14978  | 2499       | -2303 | -1861 | C |
| ATOM   | 495 | CZ3 | TRP | C | 87 | 52.205 | 42.169 | 21.084 | 1.00139.09 |       |       | C |
| ANISOU | 495 | CZ3 | TRP | C | 87 | 19527  | 17049  | 16273  | 2537       | -2434 | -1876 | C |
| ATOM   | 496 | CH2 | TRP | C | 87 | 51.845 | 43.521 | 21.161 | 1.00144.98 |       |       | C |
| ANISOU | 496 | CH2 | TRP | C | 87 | 20459  | 17786  | 16841  | 2730       | -2506 | -1922 | C |
| ATOM   | 497 | CZ2 | TRP | C | 87 | 51.684 | 44.281 | 20.035 | 1.00139.06 |       |       | C |
| ANISOU | 497 | CZ2 | TRP | C | 87 | 19860  | 16987  | 15991  | 2886       | -2449 | -1955 | C |
| ATOM   | 498 | C   | TRP | C | 87 | 54.698 | 39.097 | 16.729 | 1.00100.18 |       |       | C |
| ANISOU | 498 | C   | TRP | C | 87 | 14372  | 11660  | 12031  | 2114       | -1889 | -1658 | C |
| ATOM   | 499 | O   | TRP | C | 87 | 55.123 | 38.633 | 17.787 | 1.00104.80 |       |       | O |
| ANISOU | 499 | O   | TRP | C | 87 | 14858  | 12218  | 12742  | 1966       | -1947 | -1606 | O |
| ATOM   | 500 | N   | GLY | C | 88 | 54.576 | 38.378 | 15.620 | 1.00       | 96.49 |       | N |
| ANISOU | 500 | N   | GLY | C | 88 | 12251  | 11887  | 12524  | 2964       | 1     | -1411 | N |
| ATOM   | 501 | CA  | GLY | C | 88 | 54.981 | 36.985 | 15.582 | 1.00       | 92.60 |       | C |
| ANISOU | 501 | CA  | GLY | C | 88 | 11561  | 11585  | 12037  | 2842       | 138   | -1259 | C |
| ATOM   | 502 | C   | GLY | C | 88 | 56.426 | 36.862 | 16.000 | 1.00       | 90.04 |       | C |
| ANISOU | 502 | C   | GLY | C | 88 | 11317  | 11256  | 11637  | 2618       | 64    | -1106 | C |
| ATOM   | 503 | O   | GLY | C | 88 | 56.828 | 35.905 | 16.673 | 1.00       | 88.40 |       | O |
| ANISOU | 503 | O   | GLY | C | 88 | 11019  | 11205  | 11366  | 2518       | 170   | -1035 | O |
| ATOM   | 504 | N   | ARG | C | 89 | 57.198 | 37.855 | 15.585 | 1.00       | 88.05 |       | N |
| ANISOU | 504 | N   | ARG | C | 89 | 11243  | 10818  | 11393  | 2541       | -123  | -1061 | N |
| ATOM   | 505 | CA  | ARG | C | 89 | 58.604 | 37.918 | 15.888 | 1.00       | 95.06 |       | C |
| ANISOU | 505 | CA  | ARG | C | 89 | 12228  | 11672  | 12219  | 2331       | -219  | -930  | C |
| ATOM   | 506 | CB  | ARG | C | 89 | 59.232 | 38.940 | 14.969 | 1.00       | 90.47 |       | C |
| ANISOU | 506 | CB  | ARG | C | 89 | 11801  | 10880  | 11692  | 2268       | -411  | -877  | C |
| ATOM   | 507 | CG  | ARG | C | 89 | 59.378 | 38.306 | 13.628 | 1.00       | 88.16 |       | C |
| ANISOU | 507 | CG  | ARG | C | 89 | 11355  | 10611  | 11532  | 2207       | -397  | -732  | C |
| ATOM   | 508 | CD  | ARG | C | 89 | 59.792 | 39.199 | 12.524 | 1.00       | 91.13 |       | C |
| ANISOU | 508 | CD  | ARG | C | 89 | 11859  | 10788  | 11979  | 2160       | -565  | -683  | C |
| ATOM   | 509 | NE  | ARG | C | 89 | 59.816 | 38.357 | 11.343 | 1.00       | 86.73 |       | N |
| ANISOU | 509 | NE  | ARG | C | 89 | 11113  | 10295  | 11544  | 2105       | -512  | -547  | N |
| ATOM   | 510 | CZ  | ARG | C | 89 | 60.323 | 38.702 | 10.179 | 1.00       | 74.34 |       | C |
| ANISOU | 510 | CZ  | ARG | C | 89 | 9588   | 8600   | 10057  | 2012       | -623  | -450  | C |
| ATOM   | 511 | NH1 | ARG | C | 89 | 60.863 | 39.898 | 10.011 | 1.00       | 83.03 |       | N |
| ANISOU | 511 | NH1 | ARG | C | 89 | 10923  | 9497   | 11129  | 1962       | -799  | -472  | N |
| ATOM   | 512 | NH2 | ARG | C | 89 | 60.282 | 37.836 | 9.186  | 1.00       | 66.37 |       | N |
| ANISOU | 512 | NH2 | ARG | C | 89 | 8390   | 7671   | 9158   | 1964       | -553  | -332  | N |
| ATOM   | 513 | C   | ARG | C | 89 | 58.878 | 38.211 | 17.375 | 1.00       | 94.10 |       | C |
| ANISOU | 513 | C   | ARG | C | 89 | 12239  | 11570  | 11944  | 2306       | -218  | -1017 | C |
| ATOM   | 514 | O   | ARG | C | 89 | 59.873 | 37.747 | 17.950 | 1.00       | 86.45 |       | O |
| ANISOU | 514 | O   | ARG | C | 89 | 11276  | 10665  | 10905  | 2141       | -221  | -913  | O |
| ATOM   | 515 | N   | CYS | C | 90 | 57.970 | 38.959 | 17.999 | 1.00       | 98.76 |       | N |
| ANISOU | 515 | N   | CYS | C | 90 | 12930  | 12108  | 12485  | 2471       | -211  | -1211 | N |
| ATOM   | 516 | CA  | CYS | C | 90 | 58.061 | 39.247 | 19.426 | 1.00       | 91.78 |       | C |
| ANISOU | 516 | CA  | CYS | C | 90 | 12167  | 11247  | 11457  | 2465       | -194  | -1315 | C |
| ATOM   | 517 | CB  | CYS | C | 90 | 57.055 | 40.315 | 19.850 | 1.00       | 93.14 |       | C |
| ANISOU | 517 | CB  | CYS | C | 90 | 12468  | 11316  | 11605  | 2653       | -220  | -1538 | C |
| ATOM   | 518 | SG  | CYS | C | 90 | 57.522 | 42.005 | 19.403 | 1.00       | 95.71 |       | S |
| ANISOU | 518 | SG  | CYS | C | 90 | 13057  | 11365  | 11943  | 2656       | -461  | -1575 | S |
| ATOM   | 519 | C   | CYS | C | 90 | 57.832 | 37.986 | 20.229 | 1.00       | 88.04 |       | C |
| ANISOU | 519 | C   | CYS | C | 90 | 11537  | 10993  | 10921  | 2442       | -8    | -1302 | C |
| ATOM   | 520 | O   | CYS | C | 90 | 58.650 | 37.653 | 21.085 | 1.00       | 92.39 |       | O |
| ANISOU | 520 | O   | CYS | C | 90 | 12131  | 11604  | 11370  | 2306       | -6    | -1239 | O |
| ATOM   | 521 | N   | VAL | C | 91 | 56.717 | 37.302 | 19.966 | 1.00       | 79.71 |       | N |
| ANISOU | 521 | N   | VAL | C | 91 | 10307  | 10055  | 9925   | 2576       | 146   | -1367 | N |
| ATOM   | 522 | CA  | VAL | C | 91 | 56.404 | 36.037 | 20.634 | 1.00       | 84.08 |       | C |
| ANISOU | 522 | CA  | VAL | C | 91 | 10701  | 10822  | 10425  | 2560       | 337   | -1357 | C |
| ATOM   | 523 | CB  | VAL | C | 91 | 55.208 | 35.324 | 19.986 | 1.00       | 85.37 |       | C |
| ANISOU | 523 | CB  | VAL | C | 91 | 10657  | 11094  | 10686  | 2706       | 492   | -1410 | C |

|        |     |     |     |   |    |        |        |        |      |       |       |   |
|--------|-----|-----|-----|---|----|--------|--------|--------|------|-------|-------|---|
| ATOM   | 524 | CG1 | VAL | C | 91 | 54.831 | 34.082 | 20.809 | 1.00 | 76.85 | C     |   |
| ANISOU | 524 | CG1 | VAL | C | 91 | 9435   | 10232  | 9531   | 2693 | 697   | -1423 | C |
| ATOM   | 525 | CG2 | VAL | C | 91 | 54.029 | 36.254 | 19.882 | 1.00 | 90.99 | C     |   |
| ANISOU | 525 | CG2 | VAL | C | 91 | 11428  | 11708  | 11435  | 2915 | 479   | -1622 | C |
| ATOM   | 526 | C   | VAL | C | 91 | 57.613 | 35.111 | 20.549 | 1.00 | 86.38 | C     |   |
| ANISOU | 526 | C   | VAL | C | 91 | 10917  | 11199  | 10706  | 2354 | 334   | -1140 | C |
| ATOM   | 527 | O   | VAL | C | 91 | 57.955 | 34.405 | 21.499 | 1.00 | 80.54 | O     |   |
| ANISOU | 527 | O   | VAL | C | 91 | 10157  | 10581  | 9862   | 2268 | 412   | -1109 | O |
| ATOM   | 528 | N   | ALA | C | 92 | 58.248 | 35.139 | 19.378 | 1.00 | 88.71 | N     |   |
| ANISOU | 528 | N   | ALA | C | 92 | 11173  | 11423  | 11110  | 2273 | 237   | -993  | N |
| ATOM   | 529 | CA  | ALA | C | 92 | 59.422 | 34.333 | 19.092 | 1.00 | 82.93 | C     |   |
| ANISOU | 529 | CA  | ALA | C | 92 | 10359  | 10753  | 10397  | 2076 | 217   | -788  | C |
| ATOM   | 530 | CB  | ALA | C | 92 | 59.883 | 34.577 | 17.658 | 1.00 | 79.54 | C     |   |
| ANISOU | 530 | CB  | ALA | C | 92 | 9899   | 10218  | 10105  | 2019 | 109   | -667  | C |
| ATOM   | 531 | C   | ALA | C | 92 | 60.556 | 34.625 | 20.060 | 1.00 | 84.08 | C     |   |
| ANISOU | 531 | C   | ALA | C | 92 | 10663  | 10863  | 10422  | 1926 | 119   | -748  | C |
| ATOM   | 532 | O   | ALA | C | 92 | 61.085 | 33.712 | 20.700 | 1.00 | 82.80 | O     |   |
| ANISOU | 532 | O   | ALA | C | 92 | 10434  | 10830  | 10196  | 1817 | 184   | -665  | O |
| ATOM   | 533 | N   | VAL | C | 93 | 60.893 | 35.903 | 20.196 | 1.00 | 83.39 | N     |   |
| ANISOU | 533 | N   | VAL | C | 93 | 10786  | 10599  | 10300  | 1926 | -37   | -813  | N |
| ATOM   | 534 | CA  | VAL | C | 93 | 61.979 | 36.314 | 21.073 | 1.00 | 83.61 | C     |   |
| ANISOU | 534 | CA  | VAL | C | 93 | 10977  | 10575  | 10215  | 1787 | -143  | -785  | C |
| ATOM   | 535 | CB  | VAL | C | 93 | 62.145 | 37.841 | 21.083 | 1.00 | 81.56 | C     |   |
| ANISOU | 535 | CB  | VAL | C | 93 | 10951  | 10108  | 9931   | 1819 | -308  | -879  | C |
| ATOM   | 536 | CG1 | VAL | C | 93 | 63.331 | 38.234 | 21.936 | 1.00 | 74.45 | C     |   |
| ANISOU | 536 | CG1 | VAL | C | 93 | 10211  | 9158   | 8919   | 1665 | -417  | -842  | C |
| ATOM   | 537 | CG2 | VAL | C | 93 | 62.330 | 38.360 | 19.680 | 1.00 | 88.00 | C     |   |
| ANISOU | 537 | CG2 | VAL | C | 93 | 11773  | 10786  | 10876  | 1809 | -416  | -814  | C |
| ATOM   | 538 | C   | VAL | C | 93 | 61.731 | 35.823 | 22.494 | 1.00 | 84.43 | C     |   |
| ANISOU | 538 | C   | VAL | C | 93 | 11093  | 10808  | 10179  | 1799 | -33   | -859  | C |
| ATOM   | 539 | O   | VAL | C | 93 | 62.646 | 35.340 | 23.164 | 1.00 | 84.11 | O     |   |
| ANISOU | 539 | O   | VAL | C | 93 | 11069  | 10829  | 10061  | 1654 | -49   | -771  | O |
| ATOM   | 540 | N   | VAL | C | 94 | 60.481 | 35.916 | 22.936 | 1.00 | 79.94 | N     |   |
| ANISOU | 540 | N   | VAL | C | 94 | 10512  | 10282  | 9580   | 1969 | 80    | -1025 | N |
| ATOM   | 541 | CA  | VAL | C | 94 | 60.117 | 35.445 | 24.261 | 1.00 | 79.01 | C     |   |
| ANISOU | 541 | CA  | VAL | C | 94 | 10406  | 10287  | 9328   | 1986 | 200   | -1112 | C |
| ATOM   | 542 | CB  | VAL | C | 94 | 58.696 | 35.898 | 24.664 | 1.00 | 76.69 | C     |   |
| ANISOU | 542 | CB  | VAL | C | 94 | 10134  | 9994   | 9011   | 2186 | 297   | -1334 | C |
| ATOM   | 543 | CG1 | VAL | C | 94 | 58.216 | 35.134 | 25.893 | 1.00 | 69.63 | C     |   |
| ANISOU | 543 | CG1 | VAL | C | 94 | 9207   | 9259   | 7991   | 2195 | 460   | -1413 | C |
| ATOM   | 544 | CG2 | VAL | C | 94 | 58.672 | 37.402 | 24.914 | 1.00 | 73.79 | C     |   |
| ANISOU | 544 | CG2 | VAL | C | 94 | 9986   | 9440   | 8612   | 2245 | 155   | -1464 | C |
| ATOM   | 545 | C   | VAL | C | 94 | 60.235 | 33.921 | 24.304 | 1.00 | 83.39 | C     |   |
| ANISOU | 545 | C   | VAL | C | 94 | 10763  | 11036  | 9885   | 1911 | 340   | -990  | C |
| ATOM   | 546 | O   | VAL | C | 94 | 60.724 | 33.373 | 25.290 | 1.00 | 87.24 | O     |   |
| ANISOU | 546 | O   | VAL | C | 94 | 11277  | 11611  | 10258  | 1813 | 374   | -955  | O |
| ATOM   | 547 | N   | VAL | C | 95 | 59.796 | 33.239 | 23.243 | 1.00 | 77.67 | N     |   |
| ANISOU | 547 | N   | VAL | C | 95 | 9846   | 10376  | 9288   | 1955 | 419   | -924  | N |
| ATOM   | 548 | CA  | VAL | C | 95 | 59.925 | 31.775 | 23.171 | 1.00 | 82.71 | C     |   |
| ANISOU | 548 | CA  | VAL | C | 95 | 10289  | 11196  | 9943   | 1883 | 551   | -798  | C |
| ATOM   | 549 | CB  | VAL | C | 95 | 59.243 | 31.169 | 21.913 | 1.00 | 81.50 | C     |   |
| ANISOU | 549 | CB  | VAL | C | 95 | 9923   | 11101  | 9941   | 1962 | 644   | -752  | C |
| ATOM   | 550 | CG1 | VAL | C | 95 | 59.563 | 29.677 | 21.782 | 1.00 | 73.80 | C     |   |
| ANISOU | 550 | CG1 | VAL | C | 95 | 8751   | 10303  | 8989   | 1863 | 761   | -600  | C |
| ATOM   | 551 | CG2 | VAL | C | 95 | 57.739 | 31.387 | 21.953 | 1.00 | 78.79 | C     |   |
| ANISOU | 551 | CG2 | VAL | C | 95 | 9544   | 10782  | 9609   | 2170 | 765   | -943  | C |
| ATOM   | 552 | C   | VAL | C | 95 | 61.401 | 31.355 | 23.202 | 1.00 | 86.36 | C     |   |
| ANISOU | 552 | C   | VAL | C | 95 | 10759  | 11663  | 10393  | 1674 | 450   | -610  | C |
| ATOM   | 553 | O   | VAL | C | 95 | 61.781 | 30.426 | 23.920 | 1.00 | 84.37 | O     |   |
| ANISOU | 553 | O   | VAL | C | 95 | 10457  | 11536  | 10063  | 1584 | 517   | -544  | O |
| ATOM   | 554 | N   | MET | C | 96 | 62.223 | 32.033 | 22.406 | 1.00 | 84.57 | N     |   |
| ANISOU | 554 | N   | MET | C | 96 | 10593  | 11296  | 10243  | 1596 | 287   | -528  | N |
| ATOM   | 555 | CA  | MET | C | 96 | 63.656 | 31.757 | 22.351 | 1.00 | 88.31 | C     |   |

|        |     |     |     |   |     |        |        |        |      |       |      |   |
|--------|-----|-----|-----|---|-----|--------|--------|--------|------|-------|------|---|
| ANISOU | 555 | CA  | MET | C | 96  | 11078  | 11756  | 10719  | 1396 | 176   | -365 | C |
| ATOM   | 556 | CB  | MET | C | 96  | 64.322 | 32.701 | 21.352 | 1.00 | 88.95 |      | C |
| ANISOU | 556 | CB  | MET | C | 96  | 11241  | 11662  | 10894  | 1339 | 7     | -315 | C |
| ATOM   | 557 | CG  | MET | C | 96  | 63.847 | 32.602 | 19.918 | 1.00 | 92.10 |      | C |
| ANISOU | 557 | CG  | MET | C | 96  | 11505  | 12037  | 11452  | 1396 | 30    | -271 | C |
| ATOM   | 558 | SD  | MET | C | 96  | 64.529 | 34.034 | 19.068 | 1.00 | 97.19 |      | S |
| ANISOU | 558 | SD  | MET | C | 96  | 12330  | 12443  | 12157  | 1343 | -185  | -265 | S |
| ATOM   | 559 | CE  | MET | C | 96  | 64.911 | 33.402 | 17.463 | 1.00 | 85.47 |      | C |
| ANISOU | 559 | CE  | MET | C | 96  | 10658  | 10967  | 10849  | 1251 | -188  | -98  | C |
| ATOM   | 560 | C   | MET | C | 96  | 64.358 | 31.909 | 23.711 | 1.00 | 83.01 |      | C |
| ANISOU | 560 | C   | MET | C | 96  | 10561  | 11087  | 9891   | 1306 | 122   | -386 | C |
| ATOM   | 561 | O   | MET | C | 96  | 65.026 | 30.991 | 24.187 | 1.00 | 78.75 |      | O |
| ANISOU | 561 | O   | MET | C | 96  | 9960   | 10653  | 9308   | 1188 | 146   | -283 | O |
| ATOM   | 562 | N   | VAL | C | 97  | 64.203 | 33.084 | 24.316 | 1.00 | 82.77 |      | N |
| ANISOU | 562 | N   | VAL | C | 97  | 10733  | 10936  | 9778   | 1363 | 43    | -520 | N |
| ATOM   | 563 | CA  | VAL | C | 97  | 64.803 | 33.405 | 25.616 | 1.00 | 90.04 |      | C |
| ANISOU | 563 | CA  | VAL | C | 97  | 11823  | 11842  | 10546  | 1289 | -18   | -559 | C |
| ATOM   | 564 | CB  | VAL | C | 97  | 64.550 | 34.908 | 25.990 | 1.00 | 86.10 |      | C |
| ANISOU | 564 | CB  | VAL | C | 97  | 11546  | 11180  | 9989   | 1369 | -117  | -714 | C |
| ATOM   | 565 | CG1 | VAL | C | 97  | 64.583 | 35.138 | 27.484 | 1.00 | 80.63 |      | C |
| ANISOU | 565 | CG1 | VAL | C | 97  | 11003  | 10509  | 9125   | 1357 | -107  | -812 | C |
| ATOM   | 566 | CG2 | VAL | C | 97  | 65.525 | 35.833 | 25.253 | 1.00 | 81.70 |      | C |
| ANISOU | 566 | CG2 | VAL | C | 97  | 11093  | 10452  | 9495   | 1278 | -305  | -649 | C |
| ATOM   | 567 | C   | VAL | C | 97  | 64.287 | 32.486 | 26.730 | 1.00 | 84.12 |      | C |
| ANISOU | 567 | C   | VAL | C | 97  | 11028  | 11256  | 9679   | 1313 | 136   | -603 | C |
| ATOM   | 568 | O   | VAL | C | 97  | 65.051 | 32.080 | 27.616 | 1.00 | 77.12 |      | O |
| ANISOU | 568 | O   | VAL | C | 97  | 10193  | 10419  | 8690   | 1195 | 109   | -548 | O |
| ATOM   | 569 | N   | ALA | C | 98  | 63.009 | 32.121 | 26.644 | 1.00 | 77.90 |      | N |
| ANISOU | 569 | N   | ALA | C | 98  | 10138  | 10551  | 8909   | 1460 | 296   | -699 | N |
| ATOM   | 570 | CA  | ALA | C | 98  | 62.390 | 31.254 | 27.635 | 1.00 | 78.09 |      | C |
| ANISOU | 570 | CA  | ALA | C | 98  | 10118  | 10730  | 8823   | 1490 | 459   | -756 | C |
| ATOM   | 571 | CB  | ALA | C | 98  | 60.926 | 31.050 | 27.320 | 1.00 | 76.65 |      | C |
| ANISOU | 571 | CB  | ALA | C | 98  | 9823   | 10613  | 8687   | 1666 | 624   | -882 | C |
| ATOM   | 572 | C   | ALA | C | 98  | 63.113 | 29.922 | 27.673 | 1.00 | 83.62 |      | C |
| ANISOU | 572 | C   | ALA | C | 98  | 10685  | 11564  | 9522   | 1354 | 500   | -584 | C |
| ATOM   | 573 | O   | ALA | C | 98  | 63.388 | 29.385 | 28.743 | 1.00 | 87.00 |      | O |
| ANISOU | 573 | O   | ALA | C | 98  | 11162  | 12073  | 9822   | 1284 | 535   | -576 | O |
| ATOM   | 574 | N   | GLY | C | 99  | 63.447 | 29.409 | 26.494 | 1.00 | 88.13 |      | N |
| ANISOU | 574 | N   | GLY | C | 99  | 11094  | 12152  | 10239  | 1312 | 488   | -446 | N |
| ATOM   | 575 | CA  | GLY | C | 99  | 64.142 | 28.141 | 26.376 | 1.00 | 81.83 |      | C |
| ANISOU | 575 | CA  | GLY | C | 99  | 10150  | 11475  | 9465   | 1185 | 521   | -277 | C |
| ATOM   | 576 | C   | GLY | C | 99  | 65.593 | 28.200 | 26.813 | 1.00 | 79.56 |      | C |
| ANISOU | 576 | C   | GLY | C | 99  | 9958   | 11140  | 9131   | 1009 | 363   | -167 | C |
| ATOM   | 577 | O   | GLY | C | 99  | 66.050 | 27.315 | 27.534 | 1.00 | 81.80 |      | O |
| ANISOU | 577 | O   | GLY | C | 99  | 10219  | 11526  | 9337   | 919  | 393   | -98  | O |
| ATOM   | 578 | N   | ILE | C | 100 | 66.319 | 29.224 | 26.359 | 1.00 | 78.56 |      | N |
| ANISOU | 578 | N   | ILE | C | 100 | 9939   | 10858  | 9053   | 958  | 194   | -153 | N |
| ATOM   | 579 | CA  | ILE | C | 100 | 67.729 | 29.400 | 26.710 | 1.00 | 78.42 |      | C |
| ANISOU | 579 | CA  | ILE | C | 100 | 10016  | 10781  | 9000   | 790  | 33    | -62  | C |
| ATOM   | 580 | CB  | ILE | C | 100 | 68.358 | 30.628 | 26.012 | 1.00 | 79.47 |      | C |
| ANISOU | 580 | CB  | ILE | C | 100 | 10261  | 10732  | 9202   | 752  | -138  | -65  | C |
| ATOM   | 581 | CG1 | ILE | C | 100 | 68.132 | 30.571 | 24.504 | 1.00 | 81.10 |      | C |
| ANISOU | 581 | CG1 | ILE | C | 100 | 10322  | 10910  | 9585   | 779  | -126  | -3   | C |
| ATOM   | 582 | CD1 | ILE | C | 100 | 68.616 | 31.811 | 23.785 | 1.00 | 86.02 |      | C |
| ANISOU | 582 | CD1 | ILE | C | 100 | 11067  | 11347  | 10269  | 751  | -283  | -19  | C |
| ATOM   | 583 | CG2 | ILE | C | 100 | 69.841 | 30.728 | 26.340 | 1.00 | 78.15 |      | C |
| ANISOU | 583 | CG2 | ILE | C | 100 | 10174  | 10514  | 9005   | 572  | -297  | 27   | C |
| ATOM   | 584 | C   | ILE | C | 100 | 67.899 | 29.553 | 28.221 | 1.00 | 87.38 |      | C |
| ANISOU | 584 | C   | ILE | C | 100 | 11319  | 11931  | 9950   | 765  | 17    | -136 | C |
| ATOM   | 585 | O   | ILE | C | 100 | 68.807 | 28.967 | 28.815 | 1.00 | 85.99 |      | O |
| ANISOU | 585 | O   | ILE | C | 100 | 11152  | 11804  | 9715   | 637  | -34   | -46  | O |
| ATOM   | 586 | N   | THR | C | 101 | 67.027 | 30.343 | 28.841 | 1.00 | 89.32 |      | N |
| ANISOU | 586 | N   | THR | C | 101 | 11698  | 12134  | 10107  | 887  | 58    | -302 | N |

|        |     |     |     |   |     |        |        |        |      |        |      |   |
|--------|-----|-----|-----|---|-----|--------|--------|--------|------|--------|------|---|
| ATOM   | 587 | CA  | THR | C | 101 | 67.090 | 30.533 | 30.287 | 1.00 | 87.15  |      | C |
| ANISOU | 587 | CA  | THR | C | 101 | 11589  | 11872  | 9653   | 867  | 54     | -385 | C |
| ATOM   | 588 | CB  | THR | C | 101 | 66.135 | 31.658 | 30.761 | 1.00 | 86.43  |      | C |
| ANISOU | 588 | CB  | THR | C | 101 | 11649  | 11699  | 9492   | 1006 | 79     | -582 | C |
| ATOM   | 589 | OG1 | THR | C | 101 | 66.669 | 32.932 | 30.367 | 1.00 | 77.47  |      | O |
| ANISOU | 589 | OG1 | THR | C | 101 | 10646  | 10391  | 8396   | 992  | -84    | -606 | O |
| ATOM   | 590 | CG2 | THR | C | 101 | 66.028 | 31.660 | 32.279 | 1.00 | 104.31 |      | C |
| ANISOU | 590 | CG2 | THR | C | 101 | 14059  | 14006  | 11568  | 989  | 115    | -674 | C |
| ATOM   | 591 | C   | THR | C | 101 | 66.774 | 29.238 | 31.031 | 1.00 | 85.63  |      | C |
| ANISOU | 591 | C   | THR | C | 101 | 11311  | 11852  | 9374   | 851  | 197    | -356 | C |
| ATOM   | 592 | O   | THR | C | 101 | 67.523 | 28.833 | 31.921 | 1.00 | 94.39  |      | O |
| ANISOU | 592 | O   | THR | C | 101 | 12488  | 12997  | 10377  | 739  | 149    | -302 | O |
| ATOM   | 593 | N   | SER | C | 102 | 65.679 | 28.590 | 30.655 | 1.00 | 82.57  |      | N |
| ANISOU | 593 | N   | SER | C | 102 | 10777  | 11565  | 9031   | 959  | 369    | -391 | N |
| ATOM   | 594 | CA  | SER | C | 102 | 65.262 | 27.349 | 31.299 | 1.00 | 90.16  |      | C |
| ANISOU | 594 | CA  | SER | C | 102 | 11655  | 12691  | 9912   | 951  | 523    | -373 | C |
| ATOM   | 595 | CB  | SER | C | 102 | 64.009 | 26.792 | 30.614 | 1.00 | 91.33  |      | C |
| ANISOU | 595 | CB  | SER | C | 102 | 11627  | 12933  | 10142  | 1085 | 709    | -421 | C |
| ATOM   | 596 | OG  | SER | C | 102 | 62.925 | 27.697 | 30.702 | 1.00 | 95.19  |      | O |
| ANISOU | 596 | OG  | SER | C | 102 | 12189  | 13364  | 10614  | 1235 | 764    | -608 | O |
| ATOM   | 597 | C   | SER | C | 102 | 66.361 | 26.284 | 31.290 | 1.00 | 91.74  |      | C |
| ANISOU | 597 | C   | SER | C | 102 | 11767  | 12964  | 10126  | 796  | 472    | -187 | C |
| ATOM   | 598 | O   | SER | C | 102 | 66.728 | 25.755 | 32.346 | 1.00 | 93.27  |      | O |
| ANISOU | 598 | O   | SER | C | 102 | 12033  | 13219  | 10186  | 719  | 475    | -166 | O |
| ATOM   | 599 | N   | PHE | C | 103 | 66.884 | 25.973 | 30.105 | 1.00 | 88.82  |      | N |
| ANISOU | 599 | N   | PHE | C | 103 | 11244  | 12585  | 9917   | 749  | 424    | -55  | N |
| ATOM   | 600 | CA  | PHE | C | 103 | 67.952 | 24.984 | 29.984 | 1.00 | 88.03  |      | C |
| ANISOU | 600 | CA  | PHE | C | 103 | 11045  | 12549  | 9855   | 602  | 368    | 120  | C |
| ATOM   | 601 | CB  | PHE | C | 103 | 68.206 | 24.626 | 28.522 | 1.00 | 91.51  |      | C |
| ANISOU | 601 | CB  | PHE | C | 103 | 11285  | 12991  | 10492  | 578  | 358    | 239  | C |
| ATOM   | 602 | CG  | PHE | C | 103 | 67.164 | 23.717 | 27.922 | 1.00 | 84.23  |      | C |
| ANISOU | 602 | CG  | PHE | C | 103 | 10166  | 12196  | 9640   | 673  | 551    | 247  | C |
| ATOM   | 603 | CD1 | PHE | C | 103 | 67.156 | 22.356 | 28.207 | 1.00 | 84.02  |      | C |
| ANISOU | 603 | CD1 | PHE | C | 103 | 10015  | 12321  | 9588   | 628  | 658    | 333  | C |
| ATOM   | 604 | CE1 | PHE | C | 103 | 66.215 | 21.514 | 27.637 | 1.00 | 78.25  |      | C |
| ANISOU | 604 | CE1 | PHE | C | 103 | 9099   | 11709  | 8922   | 712  | 839    | 340  | C |
| ATOM   | 605 | CZ  | PHE | C | 103 | 65.293 | 22.022 | 26.748 | 1.00 | 86.63  |      | C |
| ANISOU | 605 | CZ  | PHE | C | 103 | 10094  | 12739  | 10081  | 841  | 908    | 263  | C |
| ATOM   | 606 | CE2 | PHE | C | 103 | 65.307 | 23.371 | 26.433 | 1.00 | 85.55  |      | C |
| ANISOU | 606 | CE2 | PHE | C | 103 | 10082  | 12447  | 9976   | 887  | 793    | 182  | C |
| ATOM   | 607 | CD2 | PHE | C | 103 | 66.243 | 24.207 | 27.011 | 1.00 | 81.64  |      | C |
| ANISOU | 607 | CD2 | PHE | C | 103 | 9774   | 11834  | 9412   | 801  | 618    | 175  | C |
| ATOM   | 608 | C   | PHE | C | 103 | 69.250 | 25.471 | 30.628 | 1.00 | 87.62  |      | C |
| ANISOU | 608 | C   | PHE | C | 103 | 11149  | 12407  | 9734   | 467  | 176    | 162  | C |
| ATOM   | 609 | O   | PHE | C | 103 | 70.075 | 24.670 | 31.081 | 1.00 | 86.11  |      | O |
| ANISOU | 609 | O   | PHE | C | 103 | 10936  | 12276  | 9506   | 349  | 131    | 266  | O |
| ATOM   | 610 | N   | GLY | C | 104 | 69.431 | 26.789 | 30.651 | 1.00 | 89.08  |      | N |
| ANISOU | 610 | N   | GLY | C | 104 | 11492  | 12448  | 9907   | 485  | 62     | 77   | N |
| ATOM   | 611 | CA  | GLY | C | 104 | 70.611 | 27.393 | 31.246 | 1.00 | 92.41  |      | C |
| ANISOU | 611 | CA  | GLY | C | 104 | 12073  | 12776  | 10263  | 366  | -119   | 98   | C |
| ATOM   | 612 | C   | GLY | C | 104 | 70.627 | 27.148 | 32.736 | 1.00 | 99.12  |      | C |
| ANISOU | 612 | C   | GLY | C | 104 | 13062  | 13679  | 10921  | 340  | -101   | 49   | C |
| ATOM   | 613 | O   | GLY | C | 104 | 71.679 | 26.931 | 33.347 | 1.00 | 96.70  |      | O |
| ANISOU | 613 | O   | GLY | C | 104 | 12821  | 13367  | 10554  | 214  | -217   | 118  | O |
| ATOM   | 614 | N   | LEU | C | 105 | 69.442 | 27.198 | 33.328 | 1.00 | 102.46 |      | N |
| ANISOU | 614 | N   | LEU | C | 105 | 13532  | 14150  | 11248  | 458  | 43     | -80  | N |
| ATOM   | 615 | CA  | LEU | C | 105 | 69.300 | 26.959 | 34.750 | 1.00 | 101.57 |      | C |
| ANISOU | 615 | CA  | LEU | C | 105 | 13556  | 14091  | 10945  | 438  | 82     | -143 | C |
| ATOM   | 616 | CB  | LEU | C | 105 | 67.937 | 27.474 | 35.227 | 1.00 | 106.30 |      | C |
| ANISOU | 616 | CB  | LEU | C | 105 | 14232  | 14696  | 11460  | 582  | 222    | -328 | C |
| ATOM   | 617 | CG  | LEU | C | 105 | 67.594 | 27.516 | 36.715 | 1.00 | 120.35 |      | C |
| ANISOU | 617 | CG  | LEU | C | 105 | 16185  | 16510  | 13035  | 577  | 274    | -438 | C |
| ATOM   | 618 | CD1 | LEU | C | 105 | 66.684 | 28.694 | 37.040 | 1.00 | 122.03 |      | C |

|        |     |     |     |   |     |        |        |        |            |       |      |   |
|--------|-----|-----|-----|---|-----|--------|--------|--------|------------|-------|------|---|
| ANISOU | 618 | CD1 | LEU | C | 105 | 16527  | 16642  | 13196  | 696        | 314   | -634 | C |
| ATOM   | 619 | CD2 | LEU | C | 105 | 66.897 | 26.222 | 37.056 | 1.00113.25 |       |      | C |
| ANISOU | 619 | CD2 | LEU | C | 105 | 15182  | 15770  | 12078  | 594        | 455   | -424 | C |
| ATOM   | 620 | C   | LEU | C | 105 | 69.500 | 25.473 | 35.074 | 1.00       | 97.85 |      | C |
| ANISOU | 620 | C   | LEU | C | 105 | 12974  | 13765  | 10438  | 367        | 154   | -28  | C |
| ATOM   | 621 | O   | LEU | C | 105 | 70.132 | 25.145 | 36.074 | 1.00107.91 |       |      | O |
| ANISOU | 621 | O   | LEU | C | 105 | 14353  | 15061  | 11588  | 272        | 93    | 4    | O |
| ATOM   | 622 | N   | VAL | C | 106 | 68.993 | 24.582 | 34.222 | 1.00       | 91.70 |      | N |
| ANISOU | 622 | N   | VAL | C | 106 | 11988  | 13081  | 9771   | 409        | 277   | 35   | N |
| ATOM   | 623 | CA  | VAL | C | 106 | 69.168 | 23.139 | 34.424 | 1.00       | 90.38 |      | C |
| ANISOU | 623 | CA  | VAL | C | 106 | 11704  | 13052  | 9585   | 344        | 349   | 150  | C |
| ATOM   | 624 | CB  | VAL | C | 106 | 68.437 | 22.315 | 33.358 | 1.00       | 83.32 |      | C |
| ANISOU | 624 | CB  | VAL | C | 106 | 10575  | 12255  | 8826   | 414        | 502   | 199  | C |
| ATOM   | 625 | CG1 | VAL | C | 106 | 68.775 | 20.834 | 33.499 | 1.00       | 65.71 |      | C |
| ANISOU | 625 | CG1 | VAL | C | 106 | 8221   | 10157  | 6589   | 333        | 556   | 333  | C |
| ATOM   | 626 | CG2 | VAL | C | 106 | 66.938 | 22.516 | 33.496 | 1.00       | 88.14 |      | C |
| ANISOU | 626 | CG2 | VAL | C | 106 | 11192  | 12909  | 9390   | 568        | 688   | 40   | C |
| ATOM   | 627 | C   | VAL | C | 106 | 70.666 | 22.808 | 34.426 | 1.00       | 93.71 |      | C |
| ANISOU | 627 | C   | VAL | C | 106 | 12119  | 13445  | 10040  | 187        | 170   | 300  | C |
| ATOM   | 628 | O   | VAL | C | 106 | 71.127 | 21.902 | 35.131 | 1.00       | 93.28 |      | O |
| ANISOU | 628 | O   | VAL | C | 106 | 12074  | 13466  | 9903   | 103        | 160   | 374  | O |
| ATOM   | 629 | N   | THR | C | 107 | 71.426 | 23.556 | 33.631 | 1.00       | 92.87 |      | N |
| ANISOU | 629 | N   | THR | C | 107 | 12002  | 13228  | 10056  | 145        | 26    | 339  | N |
| ATOM   | 630 | CA  | THR | C | 107 | 72.880 | 23.407 | 33.602 | 1.00       | 92.59 |      | C |
| ANISOU | 630 | CA  | THR | C | 107 | 11968  | 13150  | 10062  | -6         | -156  | 459  | C |
| ATOM   | 631 | CB  | THR | C | 107 | 73.512 | 24.249 | 32.474 | 1.00       | 93.90 |      | C |
| ANISOU | 631 | CB  | THR | C | 107 | 12094  | 13196  | 10387  | -38        | -280  | 488  | C |
| ATOM   | 632 | OG1 | THR | C | 107 | 73.362 | 23.549 | 31.231 | 1.00       | 93.13 |      | O |
| ANISOU | 632 | OG1 | THR | C | 107 | 11767  | 13156  | 10463  | -32        | -210  | 582  | O |
| ATOM   | 633 | CG2 | THR | C | 107 | 74.997 | 24.461 | 32.725 | 1.00       | 80.45 |      | C |
| ANISOU | 633 | CG2 | THR | C | 107 | 10461  | 11420  | 8686   | -189       | -484  | 557  | C |
| ATOM   | 634 | C   | THR | C | 107 | 73.487 | 23.803 | 34.944 | 1.00       | 97.17 |      | C |
| ANISOU | 634 | C   | THR | C | 107 | 12766  | 13686  | 10469  | -73        | -268  | 416  | C |
| ATOM   | 635 | O   | THR | C | 107 | 74.406 | 23.138 | 35.438 | 1.00       | 96.63 |      | O |
| ANISOU | 635 | O   | THR | C | 107 | 12703  | 13649  | 10363  | -186       | -359  | 508  | O |
| ATOM   | 636 | N   | ALA | C | 108 | 72.964 | 24.879 | 35.532 | 1.00101.29 |       |      | N |
| ANISOU | 636 | N   | ALA | C | 108 | 13466  | 14133  | 10885  | -3         | -264  | 272  | N |
| ATOM   | 637 | CA  | ALA | C | 108 | 73.442 | 25.371 | 36.824 | 1.00102.05 |       |      | C |
| ANISOU | 637 | CA  | ALA | C | 108 | 13783  | 14182  | 10810  | -60        | -361  | 215  | C |
| ATOM   | 638 | CB  | ALA | C | 108 | 72.768 | 26.681 | 37.176 | 1.00109.35 |       |      | C |
| ANISOU | 638 | CB  | ALA | C | 108 | 14874  | 15013  | 11662  | 33         | -345  | 50   | C |
| ATOM   | 639 | C   | ALA | C | 108 | 73.204 | 24.345 | 37.923 | 1.00104.51 |       |      | C |
| ANISOU | 639 | C   | ALA | C | 108 | 14132  | 14608  | 10968  | -85        | -279  | 229  | C |
| ATOM   | 640 | O   | ALA | C | 108 | 74.106 | 24.044 | 38.709 | 1.00109.35 |       |      | O |
| ANISOU | 640 | O   | ALA | C | 108 | 14833  | 15221  | 11495  | -193       | -394  | 285  | O |
| ATOM   | 641 | N   | ALA | C | 109 | 71.981 | 23.820 | 37.967 | 1.00100.21 |       |      | N |
| ANISOU | 641 | N   | ALA | C | 109 | 13526  | 14159  | 10389  | 14         | -82   | 172  | N |
| ATOM   | 642 | CA  | ALA | C | 109 | 71.603 | 22.821 | 38.954 | 1.00109.24 |       |      | C |
| ANISOU | 642 | CA  | ALA | C | 109 | 14706  | 15416  | 11384  | -5         | 21    | 174  | C |
| ATOM   | 643 | CB  | ALA | C | 109 | 70.187 | 22.329 | 38.701 | 1.00111.05 |       |      | C |
| ANISOU | 643 | CB  | ALA | C | 109 | 14833  | 15745  | 11616  | 116        | 251   | 103  | C |
| ATOM   | 644 | C   | ALA | C | 109 | 72.587 | 21.663 | 38.911 | 1.00110.77 |       |      | C |
| ANISOU | 644 | C   | ALA | C | 109 | 14804  | 15672  | 11613  | -123       | -57   | 344  | C |
| ATOM   | 645 | O   | ALA | C | 109 | 72.978 | 21.133 | 39.952 | 1.00118.92 |       |      | O |
| ANISOU | 645 | O   | ALA | C | 109 | 15942  | 16738  | 12503  | -198       | -95   | 371  | O |
| ATOM   | 646 | N   | LEU | C | 110 | 72.995 | 21.283 | 37.704 | 1.00105.34 |       |      | N |
| ANISOU | 646 | N   | LEU | C | 110 | 13916  | 14993  | 11115  | -141       | -85   | 455  | N |
| ATOM   | 647 | CA  | LEU | C | 110 | 73.982 | 20.223 | 37.552 | 1.00107.19 |       |      | C |
| ANISOU | 647 | CA  | LEU | C | 110 | 14041  | 15279  | 11409  | -253       | -169  | 614  | C |
| ATOM   | 648 | CB  | LEU | C | 110 | 74.129 | 19.818 | 36.087 | 1.00103.71 |       |      | C |
| ANISOU | 648 | CB  | LEU | C | 110 | 13356  | 14860  | 11190  | -251       | -151  | 713  | C |
| ATOM   | 649 | CG  | LEU | C | 110 | 72.998 | 19.011 | 35.465 | 1.00       | 96.04 |      | C |
| ANISOU | 649 | CG  | LEU | C | 110 | 12210  | 14004  | 10277  | -157       | 63    | 720  | C |



|        |     |     |     |   |     |        |        |        |      |        |      |   |
|--------|-----|-----|-----|---|-----|--------|--------|--------|------|--------|------|---|
| ATOM   | 650 | CD1 | LEU | C | 110 | 73.306 | 18.755 | 33.995 | 1.00 | 91.77  |      | C |
| ANISOU | 650 | CD1 | LEU | C | 110 | 11441  | 13465  | 9961   | -171 | 52     | 821  | C |
| ATOM   | 651 | CD2 | LEU | C | 110 | 72.829 | 17.697 | 36.216 | 1.00 | 83.20  |      | C |
| ANISOU | 651 | CD2 | LEU | C | 110 | 10567  | 12504  | 8543   | -189 | 150    | 776  | C |
| ATOM   | 652 | C   | LEU | C | 110 | 75.342 | 20.636 | 38.117 | 1.00 | 107.86 |      | C |
| ANISOU | 652 | C   | LEU | C | 110 | 14254  | 15275  | 11454  | -375 | -394   | 654  | C |
| ATOM   | 653 | O   | LEU | C | 110 | 76.039 | 19.823 | 38.721 | 1.00 | 110.38 |      | O |
| ANISOU | 653 | O   | LEU | C | 110 | 14589  | 15636  | 11715  | -466 | -467   | 738  | O |
| ATOM   | 654 | N   | ALA | C | 111 | 75.720 | 21.897 | 37.922 | 1.00 | 105.69 |      | N |
| ANISOU | 654 | N   | ALA | C | 111 | 14073  | 14876  | 11209  | -376 | -506   | 590  | N |
| ATOM   | 655 | CA  | ALA | C | 111 | 76.997 | 22.383 | 38.430 | 1.00 | 105.34 |      | C |
| ANISOU | 655 | CA  | ALA | C | 111 | 14152  | 14742  | 11129  | -489 | -717   | 614  | C |
| ATOM   | 656 | CB  | ALA | C | 111 | 77.311 | 23.758 | 37.854 | 1.00 | 101.29 |      | C |
| ANISOU | 656 | CB  | ALA | C | 111 | 13696  | 14096  | 10695  | -480 | -815   | 550  | C |
| ATOM   | 657 | C   | ALA | C | 111 | 76.988 | 22.426 | 39.961 | 1.00 | 121.39 |      | C |
| ANISOU | 657 | C   | ALA | C | 111 | 16404  | 16782  | 12938  | -514 | -741   | 553  | C |
| ATOM   | 658 | O   | ALA | C | 111 | 77.961 | 22.031 | 40.614 | 1.00 | 125.66 |      | O |
| ANISOU | 658 | O   | ALA | C | 111 | 17006  | 17319  | 13421  | -619 | -876   | 619  | O |
| ATOM   | 659 | N   | THR | C | 112 | 75.880 | 22.896 | 40.526 | 1.00 | 119.12 |      | N |
| ANISOU | 659 | N   | THR | C | 112 | 16232  | 16501  | 12527  | -419 | -609   | 424  | N |
| ATOM   | 660 | CA  | THR | C | 112 | 75.734 | 22.985 | 41.975 | 1.00 | 116.33 |      | C |
| ANISOU | 660 | CA  | THR | C | 112 | 16094  | 16154  | 11954  | -440 | -609   | 351  | C |
| ATOM   | 661 | CB  | THR | C | 112 | 74.389 | 23.628 | 42.363 | 1.00 | 124.01 |      | C |
| ANISOU | 661 | CB  | THR | C | 112 | 17164  | 17128  | 12826  | -323 | -445   | 188  | C |
| ATOM   | 662 | OG1 | THR | C | 112 | 74.244 | 24.887 | 41.688 | 1.00 | 126.44 |      | O |
| ANISOU | 662 | OG1 | THR | C | 112 | 17483  | 17331  | 13227  | -259 | -477   | 108  | O |
| ATOM   | 663 | CG2 | THR | C | 112 | 74.301 | 23.839 | 43.874 | 1.00 | 125.25 |      | C |
| ANISOU | 663 | CG2 | THR | C | 112 | 17557  | 17279  | 12754  | -359 | -454   | 104  | C |
| ATOM   | 664 | C   | THR | C | 112 | 75.853 | 21.594 | 42.598 | 1.00 | 118.99 |      | C |
| ANISOU | 664 | C   | THR | C | 112 | 16406  | 16600  | 12206  | -500 | -576   | 443  | C |
| ATOM   | 665 | O   | THR | C | 112 | 76.604 | 21.397 | 43.548 | 1.00 | 132.71 |      | O |
| ANISOU | 665 | O   | THR | C | 112 | 18275  | 18325  | 13825  | -592 | -696   | 474  | O |
| ATOM   | 666 | N   | TRP | C | 113 | 75.132 | 20.632 | 42.026 | 1.00 | 116.76 |      | N |
| ANISOU | 666 | N   | TRP | C | 113 | 15952  | 16423  | 11987  | -448 | -418   | 488  | N |
| ATOM   | 667 | CA  | TRP | C | 113 | 75.165 | 19.236 | 42.469 | 1.00 | 125.43 |      | C |
| ANISOU | 667 | CA  | TRP | C | 113 | 17006  | 17630  | 13021  | -497 | -369   | 581  | C |
| ATOM   | 668 | CB  | TRP | C | 113 | 74.273 | 18.354 | 41.555 | 1.00 | 127.39 |      | C |
| ANISOU | 668 | CB  | TRP | C | 113 | 17036  | 17987  | 13378  | -422 | -177   | 619  | C |
| ATOM   | 669 | CG  | TRP | C | 113 | 74.209 | 16.867 | 41.939 | 1.00 | 132.73 |      | C |
| ANISOU | 669 | CG  | TRP | C | 113 | 17657  | 18783  | 13993  | -466 | -106   | 714  | C |
| ATOM   | 670 | CD1 | TRP | C | 113 | 74.178 | 16.344 | 43.201 | 1.00 | 135.21 |      | C |
| ANISOU | 670 | CD1 | TRP | C | 113 | 18136  | 19133  | 14105  | -517 | -100   | 703  | C |
| ATOM   | 671 | NE1 | TRP | C | 113 | 74.105 | 14.973 | 43.145 | 1.00 | 139.67 |      | N |
| ANISOU | 671 | NE1 | TRP | C | 113 | 18593  | 19804  | 14673  | -544 | -28    | 806  | N |
| ATOM   | 672 | CE2 | TRP | C | 113 | 74.031 | 14.581 | 41.839 | 1.00 | 132.75 |      | C |
| ANISOU | 672 | CE2 | TRP | C | 113 | 17469  | 18969  | 14003  | -507 | 27     | 880  | C |
| ATOM   | 673 | CD2 | TRP | C | 113 | 74.081 | 15.742 | 41.041 | 1.00 | 129.36 |      | C |
| ANISOU | 673 | CD2 | TRP | C | 113 | 16997  | 18452  | 13703  | -458 | -19    | 826  | C |
| ATOM   | 674 | CE3 | TRP | C | 113 | 73.999 | 15.612 | 39.652 | 1.00 | 122.73 |      | C |
| ANISOU | 674 | CE3 | TRP | C | 113 | 15924  | 17631  | 13078  | -417 | 25     | 883  | C |
| ATOM   | 675 | CZ3 | TRP | C | 113 | 73.915 | 14.335 | 39.106 | 1.00 | 124.87 |      | C |
| ANISOU | 675 | CZ3 | TRP | C | 113 | 16004  | 18009  | 13433  | -429 | 110    | 996  | C |
| ATOM   | 676 | CH2 | TRP | C | 113 | 73.870 | 13.201 | 39.925 | 1.00 | 128.91 |      | C |
| ANISOU | 676 | CH2 | TRP | C | 113 | 16559  | 18607  | 13814  | -475 | 155    | 1048 | C |
| ATOM   | 677 | CZ2 | TRP | C | 113 | 73.925 | 13.302 | 41.288 | 1.00 | 128.55 |      | C |
| ANISOU | 677 | CZ2 | TRP | C | 113 | 16750  | 18542  | 13553  | -515 | 113    | 992  | C |
| ATOM   | 678 | C   | TRP | C | 113 | 76.591 | 18.708 | 42.504 | 1.00 | 120.56 |      | C |
| ANISOU | 678 | C   | TRP | C | 113 | 16359  | 16994  | 12456  | -623 | -570   | 719  | C |
| ATOM   | 679 | O   | TRP | C | 113 | 77.034 | 18.123 | 43.495 | 1.00 | 128.17 |      | O |
| ANISOU | 679 | O   | TRP | C | 113 | 17436  | 17981  | 13284  | -697 | -637   | 758  | O |
| ATOM   | 680 | N   | PHE | C | 114 | 77.285 | 18.899 | 41.394 | 1.00 | 117.99 |      | N |
| ANISOU | 680 | N   | PHE | C | 114 | 15878  | 16625  | 12329  | -646 | -664   | 789  | N |
| ATOM   | 681 | CA  | PHE | C | 114 | 78.653 | 18.442 | 41.242 | 1.00 | 120.42 |      | C |

|        |     |     |     |   |     |        |        |        |            |       |      |   |
|--------|-----|-----|-----|---|-----|--------|--------|--------|------------|-------|------|---|
| ANISOU | 681 | CA  | PHE | C | 114 | 16123  | 16911  | 12721  | -763       | -854  | 911  | C |
| ATOM   | 682 | CB  | PHE | C | 114 | 79.100 | 18.624 | 39.786 | 1.00119.48 |       |      | C |
| ANISOU | 682 | CB  | PHE | C | 114 | 15795  | 16760  | 12843  | -770       | -896  | 971  | C |
| ATOM   | 683 | CG  | PHE | C | 114 | 78.472 | 17.646 | 38.835 | 1.00112.44 |       |      | C |
| ANISOU | 683 | CG  | PHE | C | 114 | 14673  | 15970  | 12078  | -723       | -740  | 1043 | C |
| ATOM   | 684 | CD1 | PHE | C | 114 | 77.859 | 16.503 | 39.308 | 1.00120.97 |       |      | C |
| ANISOU | 684 | CD1 | PHE | C | 114 | 15727  | 17167  | 13070  | -703       | -611  | 1080 | C |
| ATOM   | 685 | CE1 | PHE | C | 114 | 77.275 | 15.604 | 38.438 | 1.00122.25 |       |      | C |
| ANISOU | 685 | CE1 | PHE | C | 114 | 15676  | 17427  | 13347  | -660       | -462  | 1144 | C |
| ATOM   | 686 | CZ  | PHE | C | 114 | 77.299 | 15.819 | 37.100 | 1.00106.54 |       |      | C |
| ANISOU | 686 | CZ  | PHE | C | 114 | 13498  | 15421  | 11561  | -638       | -443  | 1176 | C |
| ATOM   | 687 | CE2 | PHE | C | 114 | 77.912 | 16.958 | 36.593 | 1.00110.60 |       |      | C |
| ANISOU | 687 | CE2 | PHE | C | 114 | 14040  | 15817  | 12166  | -662       | -574  | 1142 | C |
| ATOM   | 688 | CD2 | PHE | C | 114 | 78.488 | 17.868 | 37.470 | 1.00113.35 |       |      | C |
| ANISOU | 688 | CD2 | PHE | C | 114 | 14603  | 16068  | 12397  | -703       | -720  | 1074 | C |
| ATOM   | 689 | C   | PHE | C | 114 | 79.597 | 19.177 | 42.194 | 1.00117.67 |       |      | C |
| ANISOU | 689 | C   | PHE | C | 114 | 15982  | 16465  | 12261  | -842       | -1049 | 875  | C |
| ATOM   | 690 | O   | PHE | C | 114 | 80.564 | 18.599 | 42.693 | 1.00114.52 |       |      | O |
| ANISOU | 690 | O   | PHE | C | 114 | 15610  | 16068  | 11834  | -939       | -1193 | 954  | O |
| ATOM   | 691 | N   | VAL | C | 115 | 79.306 | 20.448 | 42.450 | 1.00120.81 |       |      | N |
| ANISOU | 691 | N   | VAL | C | 115 | 16527  | 16779  | 12596  | -799       | -1054 | 753  | N |
| ATOM   | 692 | CA  | VAL | C | 115 | 80.116 | 21.262 | 43.351 | 1.00130.73 |       |      | C |
| ANISOU | 692 | CA  | VAL | C | 115 | 17988  | 17943  | 13742  | -867       | -1224 | 705  | C |
| ATOM   | 693 | CB  | VAL | C | 115 | 79.929 | 22.777 | 43.059 | 1.00125.78 |       |      | C |
| ANISOU | 693 | CB  | VAL | C | 115 | 17445  | 17207  | 13138  | -817       | -1240 | 588  | C |
| ATOM   | 694 | CG1 | VAL | C | 115 | 80.297 | 23.619 | 44.278 | 1.00130.94 |       |      | C |
| ANISOU | 694 | CG1 | VAL | C | 115 | 18351  | 17786  | 13614  | -858       | -1346 | 503  | C |
| ATOM   | 695 | CG2 | VAL | C | 115 | 80.758 | 23.188 | 41.855 | 1.00111.17 |       |      | C |
| ANISOU | 695 | CG2 | VAL | C | 115 | 15455  | 15290  | 11496  | -856       | -1352 | 640  | C |
| ATOM   | 696 | C   | VAL | C | 115 | 79.755 | 20.920 | 44.801 | 1.00136.82 |       |      | C |
| ANISOU | 696 | C   | VAL | C | 115 | 18955  | 18753  | 14276  | -880       | -1189 | 663  | C |
| ATOM   | 697 | O   | VAL | C | 115 | 80.632 | 20.790 | 45.657 | 1.00141.78 |       |      | O |
| ANISOU | 697 | O   | VAL | C | 115 | 19707  | 19355  | 14810  | -970       | -1342 | 694  | O |
| ATOM   | 698 | N   | GLY | C | 116 | 78.468 | 20.772 | 45.069 | 1.00136.93 |       |      | N |
| ANISOU | 698 | N   | GLY | C | 116 | 19000  | 18830  | 14196  | -793       | -989  | 589  | N |
| ATOM   | 699 | CA  | GLY | C | 116 | 78.027 | 20.428 | 46.404 | 1.00136.95 |       |      | C |
| ANISOU | 699 | CA  | GLY | C | 116 | 19190  | 18874  | 13973  | -809       | -934  | 540  | C |
| ATOM   | 700 | C   | GLY | C | 116 | 78.711 | 19.152 | 46.830 | 1.00141.50 |       |      | C |
| ANISOU | 700 | C   | GLY | C | 116 | 19744  | 19509  | 14510  | -899       | -1012 | 669  | C |
| ATOM   | 701 | O   | GLY | C | 116 | 79.289 | 19.075 | 47.903 | 1.00152.96 |       |      | O |
| ANISOU | 701 | O   | GLY | C | 116 | 21368  | 20936  | 15814  | -977       | -1129 | 676  | O |
| ATOM   | 702 | N   | ARG | C | 117 | 78.658 | 18.151 | 45.963 | 1.00135.61 |       |      | N |
| ANISOU | 702 | N   | ARG | C | 117 | 18783  | 18839  | 13902  | -888       | -953  | 774  | N |
| ATOM   | 703 | CA  | ARG | C | 117 | 79.257 | 16.858 | 46.229 | 1.00130.43 |       |      | C |
| ANISOU | 703 | CA  | ARG | C | 117 | 18078  | 18244  | 13234  | -965       | -1019 | 902  | C |
| ATOM   | 704 | CB  | ARG | C | 117 | 78.882 | 15.852 | 45.147 | 1.00117.67 |       |      | C |
| ANISOU | 704 | CB  | ARG | C | 117 | 16209  | 16722  | 11779  | -927       | -898  | 993  | C |
| ATOM   | 705 | C   | ARG | C | 117 | 80.757 | 16.919 | 46.385 | 1.00134.39 |       |      | C |
| ANISOU | 705 | C   | ARG | C | 117 | 18604  | 18675  | 13784  | -1071      | -1275 | 978  | C |
| ATOM   | 706 | O   | ARG | C | 117 | 81.308 | 16.211 | 47.198 | 1.00146.29 |       |      | O |
| ANISOU | 706 | O   | ARG | C | 117 | 20198  | 20198  | 15189  | -1144      | -1374 | 1038 | O |
| ATOM   | 707 | N   | GLU | C | 118 | 81.431 | 17.727 | 45.589 | 1.00131.91 |       |      | N |
| ANISOU | 707 | N   | GLU | C | 118 | 18209  | 18283  | 13627  | -1082      | -1385 | 976  | N |
| ATOM   | 708 | CA  | GLU | C | 118 | 82.880 | 17.793 | 45.700 | 1.00137.84 |       |      | C |
| ANISOU | 708 | CA  | GLU | C | 118 | 18971  | 18968  | 14434  | -1187      | -1628 | 1037 | C |
| ATOM   | 709 | CB  | GLU | C | 118 | 83.552 | 18.478 | 44.528 | 1.00136.94 |       |      | C |
| ANISOU | 709 | CB  | GLU | C | 118 | 18711  | 18786  | 14535  | -1201      | -1716 | 1047 | C |
| ATOM   | 710 | CG  | GLU | C | 118 | 84.986 | 18.010 | 44.342 | 1.00139.54 |       |      | C |
| ANISOU | 710 | CG  | GLU | C | 118 | 18954  | 19088  | 14977  | -1311      | -1930 | 1143 | C |
| ATOM   | 711 | CD  | GLU | C | 118 | 85.125 | 16.498 | 44.282 | 1.00147.89 |       |      | C |
| ANISOU | 711 | CD  | GLU | C | 118 | 19879  | 20241  | 16073  | -1341      | -1919 | 1265 | C |
| ATOM   | 712 | OE1 | GLU | C | 118 | 84.117 | 15.781 | 44.400 | 1.00144.41 |       |      | O |
| ANISOU | 712 | OE1 | GLU | C | 118 | 19416  | 19888  | 15564  | -1280      | -1743 | 1280 | O |

|        |     |     |     |   |     |        |        |        |                  |   |
|--------|-----|-----|-----|---|-----|--------|--------|--------|------------------|---|
| ATOM   | 713 | OE2 | GLU | C | 118 | 86.258 | 16.020 | 44.112 | 1.00160.78       | O |
| ANISOU | 713 | OE2 | GLU | C | 118 | 21426  | 21857  | 17807  | -1426 -2090 1342 | O |
| ATOM   | 714 | C   | GLU | C | 118 | 83.386 | 18.327 | 47.008 | 1.00152.34       | C |
| ANISOU | 714 | C   | GLU | C | 118 | 21062  | 20740  | 16082  | -1244 -1763 982  | C |
| ATOM   | 715 | O   | GLU | C | 118 | 84.410 | 17.888 | 47.484 | 1.00161.19       | O |
| ANISOU | 715 | O   | GLU | C | 118 | 22220  | 21842  | 17184  | -1331 -1940 1047 | O |
| ATOM   | 716 | N   | GLN | C | 119 | 82.697 | 19.296 | 47.585 | 1.00155.36       | N |
| ANISOU | 716 | N   | GLN | C | 119 | 21617  | 21084  | 16328  | -1195 -1688 857  | N |
| ATOM   | 717 | CA  | GLN | C | 119 | 83.161 | 19.853 | 48.841 | 1.00161.45       | C |
| ANISOU | 717 | CA  | GLN | C | 119 | 22635  | 21794  | 16916  | -1253 -1812 800  | C |
| ATOM   | 718 | CB  | GLN | C | 119 | 82.230 | 20.964 | 49.301 | 1.00168.98       | C |
| ANISOU | 718 | CB  | GLN | C | 119 | 23749  | 22710  | 17744  | -1186 -1694 652  | C |
| ATOM   | 719 | CG  | GLN | C | 119 | 82.230 | 22.175 | 48.402 | 1.00171.90       | C |
| ANISOU | 719 | CG  | GLN | C | 119 | 24058  | 23004  | 18253  | -1137 -1697 585  | C |
| ATOM   | 720 | CD  | GLN | C | 119 | 83.596 | 22.791 | 48.309 | 1.00176.78       | C |
| ANISOU | 720 | CD  | GLN | C | 119 | 24698  | 23527  | 18941  | -1221 -1925 607  | C |
| ATOM   | 721 | OE1 | GLN | C | 119 | 84.308 | 22.873 | 49.302 | 1.00174.66       | O |
| ANISOU | 721 | OE1 | GLN | C | 119 | 24591  | 23224  | 18549  | -1296 -2067 604  | O |
| ATOM   | 722 | NE2 | GLN | C | 119 | 83.973 | 23.231 | 47.119 | 1.00174.55       | N |
| ANISOU | 722 | NE2 | GLN | C | 119 | 24260  | 23202  | 18859  | -1212 -1962 624  | N |
| ATOM   | 723 | C   | GLN | C | 119 | 83.198 | 18.777 | 49.906 | 1.00161.64       | C |
| ANISOU | 723 | C   | GLN | C | 119 | 22768  | 21876  | 16773  | -1305 -1830 855  | C |
| ATOM   | 724 | O   | GLN | C | 119 | 84.154 | 18.679 | 50.648 | 1.00164.86       | O |
| ANISOU | 724 | O   | GLN | C | 119 | 23289  | 22243  | 17109  | -1390 -2014 888  | O |
| ATOM   | 725 | N   | GLU | C | 120 | 82.172 | 17.961 | 49.993 | 1.00158.36       | N |
| ANISOU | 725 | N   | GLU | C | 120 | 22324  | 21553  | 16293  | -1257 -1643 864  | N |
| ATOM   | 726 | CA  | GLU | C | 120 | 82.160 | 16.905 | 50.983 | 1.00160.07       | C |
| ANISOU | 726 | CA  | GLU | C | 120 | 22652  | 21823  | 16344  | -1309 -1651 918  | C |
| ATOM   | 727 | CB  | GLU | C | 120 | 80.754 | 16.340 | 51.198 | 1.00159.66       | C |
| ANISOU | 727 | CB  | GLU | C | 120 | 22616  | 21865  | 16182  | -1245 -1399 875  | C |
| ATOM   | 728 | CG  | GLU | C | 120 | 80.412 | 15.103 | 50.401 | 1.00155.94       | C |
| ANISOU | 728 | CG  | GLU | C | 120 | 21930  | 21492  | 15826  | -1218 -1289 977  | C |
| ATOM   | 729 | CD  | GLU | C | 120 | 78.922 | 14.917 | 50.246 | 1.00154.15       | C |
| ANISOU | 729 | CD  | GLU | C | 120 | 21673  | 21348  | 15549  | -1128 -1016 902  | C |
| ATOM   | 730 | OE1 | GLU | C | 120 | 78.159 | 15.738 | 50.780 | 1.00162.35       | O |
| ANISOU | 730 | OE1 | GLU | C | 120 | 22858  | 22365  | 16462  | -1089 -915 767   | O |
| ATOM   | 731 | OE2 | GLU | C | 120 | 78.507 | 13.946 | 49.593 | 1.00151.24       | O |
| ANISOU | 731 | OE2 | GLU | C | 120 | 21131  | 21066  | 15266  | -1098 -899 972   | O |
| ATOM   | 732 | C   | GLU | C | 120 | 83.209 | 15.813 | 50.774 | 1.00164.48       | C |
| ANISOU | 732 | C   | GLU | C | 120 | 23096  | 22402  | 16997  | -1383 -1810 1064 | C |
| ATOM   | 733 | O   | GLU | C | 120 | 83.824 | 15.381 | 51.726 | 1.00175.35       | O |
| ANISOU | 733 | O   | GLU | C | 120 | 24616  | 23762  | 18247  | -1458 -1946 1103 | O |
| ATOM   | 734 | N   | ARG | C | 121 | 83.445 | 15.390 | 49.538 | 1.00161.39       | N |
| ANISOU | 734 | N   | ARG | C | 121 | 22451  | 22040  | 16831  | -1364 -1802 1143 | N |
| ATOM   | 735 | CA  | ARG | C | 121 | 84.422 | 14.319 | 49.320 | 1.00163.38       | C |
| ANISOU | 735 | CA  | ARG | C | 121 | 22582  | 22313  | 17182  | -1432 -1949 1277 | C |
| ATOM   | 736 | CB  | ARG | C | 121 | 84.453 | 13.846 | 47.867 | 1.00163.41       | C |
| ANISOU | 736 | CB  | ARG | C | 121 | 22289  | 22362  | 17437  | -1403 -1891 1352 | C |
| ATOM   | 737 | CG  | ARG | C | 121 | 85.618 | 12.922 | 47.544 | 1.00162.85       | C |
| ANISOU | 737 | CG  | ARG | C | 121 | 22078  | 22297  | 17502  | -1481 -2069 1477 | C |
| ATOM   | 738 | CD  | ARG | C | 121 | 85.387 | 12.202 | 46.228 | 1.00161.90       | C |
| ANISOU | 738 | CD  | ARG | C | 121 | 21672  | 22247  | 17597  | -1449 -1962 1556 | C |
| ATOM   | 739 | NE  | ARG | C | 121 | 86.629 | 11.859 | 45.549 | 1.00158.45       | N |
| ANISOU | 739 | NE  | ARG | C | 121 | 21061  | 21783  | 17361  | -1521 -2145 1638 | N |
| ATOM   | 740 | CZ  | ARG | C | 121 | 87.517 | 12.757 | 45.142 | 1.00157.57       | C |
| ANISOU | 740 | CZ  | ARG | C | 121 | 20921  | 21584  | 17364  | -1564 -2294 1603 | C |
| ATOM   | 741 | NH1 | ARG | C | 121 | 87.308 | 14.042 | 45.367 | 1.00162.20       | N |
| ANISOU | 741 | NH1 | ARG | C | 121 | 21649  | 22102  | 17880  | -1538 -2286 1494 | N |
| ATOM   | 742 | NH2 | ARG | C | 121 | 88.620 | 12.375 | 44.521 | 1.00150.19       | N |
| ANISOU | 742 | NH2 | ARG | C | 121 | 19819  | 20630  | 16615  | -1635 -2451 1671 | N |
| ATOM   | 743 | C   | ARG | C | 121 | 85.817 | 14.698 | 49.779 | 1.00165.48       | C |
| ANISOU | 743 | C   | ARG | C | 121 | 22933  | 22488  | 17453  | -1523 -2219 1293 | C |
| ATOM   | 744 | O   | ARG | C | 121 | 86.546 | 13.867 | 50.301 | 1.00170.47       | O |

|        |     |     |     |       |     |        |        |        |            |       |       |   |
|--------|-----|-----|-----|-------|-----|--------|--------|--------|------------|-------|-------|---|
| ANISOU | 744 | O   | ARG | C     | 121 | 23598  | 23126  | 18049  | -1590      | -2362 | 1373  | O |
| ATOM   | 745 | N   | ARG | C     | 122 | 86.206 | 15.943 | 49.559 | 1.00165.80 |       |       | N |
| ANISOU | 745 | N   | ARG | C     | 122 | 23007  | 22445  | 17545  | -1524      | -2293 | 1215  | N |
| ATOM   | 746 | CA  | ARG | C     | 122 | 87.519 | 16.381 | 49.974 | 1.00170.42 |       |       | C |
| ANISOU | 746 | CA  | ARG | C     | 122 | 23671  | 22943  | 18137  | -1609      | -2543 | 1217  | C |
| ATOM   | 747 | CB  | ARG | C     | 122 | 88.525 | 16.155 | 48.852 | 1.00172.05 |       |       | C |
| ANISOU | 747 | CB  | ARG | C     | 122 | 23641  | 23133  | 18597  | -1650      | -2668 | 1288  | C |
| ATOM   | 748 | C   | ARG | C     | 122 | 87.499 | 17.842 | 50.382 | 1.00171.62 |       |       | C |
| ANISOU | 748 | C   | ARG | C     | 122 | 23994  | 23010  | 18204  | -1600      | -2568 | 1093  | C |
| ATOM   | 749 | O   | ARG | C     | 122 | 87.259 | 18.162 | 51.541 | 1.00174.67 |       |       | O |
| ANISOU | 749 | O   | ARG | C     | 122 | 24612  | 23376  | 18379  | -1612      | -2574 | 1033  | O |
| TER    |     |     |     |       |     |        |        |        |            |       |       |   |
| HETATM | 750 | O   | HOH | C1001 |     | 61.972 | 26.532 | 12.038 | 1.00       | 81.83 |       | O |
| HETATM | 751 | O   | HOH | C1002 |     | 72.669 | 27.558 | 27.599 | 1.00       | 67.04 |       | O |
| HETATM | 752 | O   | HOH | C1003 |     | 71.205 | 25.955 | 24.088 | 1.00       | 54.08 |       | O |
| TER    |     |     |     |       |     |        |        |        |            |       |       |   |
| ATOM   | 753 | N   | SER | B     | 22  | 74.727 | 44.282 | 45.952 | 1.00199.18 |       |       | N |
| ANISOU | 753 | N   | SER | B     | 22  | 28571  | 20170  | 26940  | -1437      | -2866 | -2758 | N |
| ATOM   | 754 | CA  | SER | B     | 22  | 74.682 | 43.215 | 44.961 | 1.00188.58 |       |       | C |
| ANISOU | 754 | CA  | SER | B     | 22  | 27314  | 18983  | 25353  | -1407      | -2817 | -2710 | C |
| ATOM   | 755 | CB  | SER | B     | 22  | 74.016 | 43.703 | 43.676 | 1.00182.08 |       |       | C |
| ANISOU | 755 | CB  | SER | B     | 22  | 26498  | 18157  | 24528  | -1418      | -2802 | -2667 | C |
| ATOM   | 756 | C   | SER | B     | 22  | 76.082 | 42.707 | 44.666 | 1.00188.05 |       |       | C |
| ANISOU | 756 | C   | SER | B     | 22  | 27259  | 18934  | 25258  | -1412      | -2811 | -2684 | C |
| ATOM   | 757 | O   | SER | B     | 22  | 77.018 | 43.482 | 44.543 | 1.00193.90 |       |       | O |
| ANISOU | 757 | O   | SER | B     | 22  | 27933  | 19548  | 26193  | -1449      | -2840 | -2679 | O |
| ATOM   | 758 | N   | ALA | B     | 23  | 76.215 | 41.398 | 44.527 | 1.00181.11 |       |       | N |
| ANISOU | 758 | N   | ALA | B     | 23  | 26464  | 18210  | 24140  | -1373      | -2773 | -2661 | N |
| ATOM   | 759 | CA  | ALA | B     | 23  | 77.501 | 40.790 | 44.259 | 1.00176.60 |       |       | C |
| ANISOU | 759 | CA  | ALA | B     | 23  | 25912  | 17671  | 23516  | -1373      | -2763 | -2634 | C |
| ATOM   | 760 | CB  | ALA | B     | 23  | 77.406 | 39.285 | 44.335 | 1.00166.83 |       |       | C |
| ANISOU | 760 | CB  | ALA | B     | 23  | 24771  | 16608  | 22008  | -1325      | -2721 | -2608 | C |
| ATOM   | 761 | C   | ALA | B     | 23  | 77.862 | 41.235 | 42.872 | 1.00177.97 |       |       | C |
| ANISOU | 761 | C   | ALA | B     | 23  | 26078  | 17815  | 23727  | -1396      | -2757 | -2583 | C |
| ATOM   | 762 | O   | ALA | B     | 23  | 77.026 | 41.771 | 42.179 | 1.00182.64 |       |       | O |
| ANISOU | 762 | O   | ALA | B     | 23  | 26665  | 18390  | 24340  | -1403      | -2753 | -2566 | O |
| ATOM   | 763 | N   | LEU | B     | 24  | 79.114 | 41.058 | 42.482 | 1.00179.16 |       |       | N |
| ANISOU | 763 | N   | LEU | B     | 24  | 26223  | 17950  | 23898  | -1409      | -2758 | -2557 | N |
| ATOM   | 764 | CA  | LEU | B     | 24  | 79.595 | 41.501 | 41.175 | 1.00177.34 |       |       | C |
| ANISOU | 764 | CA  | LEU | B     | 24  | 25979  | 17681  | 23721  | -1435      | -2753 | -2505 | C |
| ATOM   | 765 | CB  | LEU | B     | 24  | 81.102 | 41.237 | 41.054 | 1.00180.11 |       |       | C |
| ANISOU | 765 | CB  | LEU | B     | 24  | 26319  | 18010  | 24105  | -1449      | -2758 | -2486 | C |
| ATOM   | 766 | CG  | LEU | B     | 24  | 81.818 | 41.558 | 39.738 | 1.00175.91 |       |       | C |
| ANISOU | 766 | CG  | LEU | B     | 24  | 25774  | 17441  | 23621  | -1476      | -2752 | -2427 | C |
| ATOM   | 767 | CD1 | LEU | B     | 24  | 81.749 | 43.040 | 39.443 | 1.00183.16 |       |       | C |
| ANISOU | 767 | CD1 | LEU | B     | 24  | 26594  | 18176  | 24823  | -1527      | -2785 | -2417 | C |
| ATOM   | 768 | CD2 | LEU | B     | 24  | 83.255 | 41.076 | 39.724 | 1.00176.73 |       |       | C |
| ANISOU | 768 | CD2 | LEU | B     | 24  | 25882  | 17551  | 23716  | -1482      | -2753 | -2410 | C |
| ATOM   | 769 | C   | LEU | B     | 24  | 78.895 | 40.887 | 39.979 | 1.00169.27 |       |       | C |
| ANISOU | 769 | C   | LEU | B     | 24  | 25039  | 16791  | 22484  | -1409      | -2712 | -2451 | C |
| ATOM   | 770 | O   | LEU | B     | 24  | 78.681 | 41.563 | 38.980 | 1.00165.28 |       |       | O |
| ANISOU | 770 | O   | LEU | B     | 24  | 24512  | 16236  | 22052  | -1433      | -2712 | -2418 | O |
| ATOM   | 771 | N   | HIS | B     | 25  | 78.556 | 39.612 | 40.059 | 1.00167.37 |       |       | N |
| ANISOU | 771 | N   | HIS | B     | 25  | 24893  | 16714  | 21984  | -1362      | -2676 | -2433 | N |
| ATOM   | 772 | CA  | HIS | B     | 25  | 77.955 | 38.962 | 38.911 | 1.00158.07 |       |       | C |
| ANISOU | 772 | CA  | HIS | B     | 25  | 23803  | 15665  | 20591  | -1335      | -2635 | -2369 | C |
| ATOM   | 773 | CB  | HIS | B     | 25  | 77.766 | 37.469 | 39.166 | 1.00146.42 |       |       | C |
| ANISOU | 773 | CB  | HIS | B     | 25  | 22432  | 14356  | 18845  | -1285      | -2593 | -2337 | C |
| ATOM   | 774 | C   | HIS | B     | 25  | 76.654 | 39.579 | 38.453 | 1.00154.39 |       |       | C |
| ANISOU | 774 | C   | HIS | B     | 25  | 23333  | 15187  | 20143  | -1338      | -2633 | -2367 | C |
| ATOM   | 775 | O   | HIS | B     | 25  | 76.460 | 39.774 | 37.260 | 1.00154.52 |       |       | O |
| ANISOU | 775 | O   | HIS | B     | 25  | 23369  | 15221  | 20121  | -1346      | -2619 | -2319 | O |
| ATOM   | 776 | N   | TRP | B     | 26  | 75.779 | 39.921 | 39.378 | 1.00151.74 |       |       | N |

|        |     |     |     |   |    |        |        |        |            |       |       |   |
|--------|-----|-----|-----|---|----|--------|--------|--------|------------|-------|-------|---|
| ANISOU | 776 | N   | TRP | B | 26 | 22968  | 14817  | 19870  | -1333      | -2649 | -2417 | N |
| ATOM   | 777 | CA  | TRP | B | 26 | 74.512 | 40.488 | 38.978 | 1.00149.92 |       |       | C |
| ANISOU | 777 | CA  | TRP | B | 26 | 22733  | 14576  | 19652  | -1335      | -2647 | -2415 | C |
| ATOM   | 778 | CB  | TRP | B | 26 | 73.507 | 40.527 | 40.113 | 1.00157.00 |       |       | C |
| ANISOU | 778 | CB  | TRP | B | 26 | 23622  | 15473  | 20559  | -1318      | -2656 | -2467 | C |
| ATOM   | 779 | CG  | TRP | B | 26 | 72.865 | 39.198 | 40.222 | 1.00157.13 |       |       | C |
| ANISOU | 779 | CG  | TRP | B | 26 | 23740  | 15657  | 20304  | -1267      | -2615 | -2434 | C |
| ATOM   | 780 | CD1 | TRP | B | 26 | 73.502 | 38.008 | 40.302 | 1.00156.82 |       |       | C |
| ANISOU | 780 | CD1 | TRP | B | 26 | 23768  | 15722  | 20094  | -1239      | -2587 | -2399 | C |
| ATOM   | 781 | NE1 | TRP | B | 26 | 72.596 | 36.986 | 40.367 | 1.00155.10 |       |       | N |
| ANISOU | 781 | NE1 | TRP | B | 26 | 23636  | 15635  | 19660  | -1198      | -2546 | -2361 | N |
| ATOM   | 782 | CE2 | TRP | B | 26 | 71.333 | 37.508 | 40.315 | 1.00162.72 |       |       | C |
| ANISOU | 782 | CE2 | TRP | B | 26 | 24593  | 16588  | 20645  | -1196      | -2550 | -2374 | C |
| ATOM   | 783 | CD2 | TRP | B | 26 | 71.464 | 38.907 | 40.217 | 1.00164.54 |       |       | C |
| ANISOU | 783 | CD2 | TRP | B | 26 | 24729  | 16674  | 21117  | -1238      | -2594 | -2421 | C |
| ATOM   | 784 | CE3 | TRP | B | 26 | 70.309 | 39.690 | 40.151 | 1.00166.77 |       |       | C |
| ANISOU | 784 | CE3 | TRP | B | 26 | 24983  | 16912  | 21471  | -1246      | -2605 | -2442 | C |
| ATOM   | 785 | CZ3 | TRP | B | 26 | 69.079 | 39.058 | 40.184 | 1.00162.15 |       |       | C |
| ANISOU | 785 | CZ3 | TRP | B | 26 | 24465  | 16433  | 20713  | -1210      | -2576 | -2418 | C |
| ATOM   | 786 | CH2 | TRP | B | 26 | 68.982 | 37.659 | 40.280 | 1.00161.35 |       |       | C |
| ANISOU | 786 | CH2 | TRP | B | 26 | 24458  | 16472  | 20377  | -1169      | -2532 | -2368 | C |
| ATOM   | 787 | CZ2 | TRP | B | 26 | 70.094 | 36.870 | 40.347 | 1.00159.39 |       |       | C |
| ANISOU | 787 | CZ2 | TRP | B | 26 | 24238  | 16264  | 20059  | -1162      | -2518 | -2344 | C |
| ATOM   | 788 | C   | TRP | B | 26 | 74.714 | 41.783 | 38.236 | 1.00149.13 |       |       | C |
| ANISOU | 788 | C   | TRP | B | 26 | 22553  | 14334  | 19775  | -1384      | -2671 | -2409 | C |
| ATOM   | 789 | O   | TRP | B | 26 | 73.979 | 42.078 | 37.312 | 1.00140.50 |       |       | O |
| ANISOU | 789 | O   | TRP | B | 26 | 21476  | 13257  | 18651  | -1387      | -2658 | -2377 | O |
| ATOM   | 790 | N   | ARG | B | 27 | 75.706 | 42.560 | 38.640 | 1.00158.44 |       |       | N |
| ANISOU | 790 | N   | ARG | B | 27 | 23646  | 15368  | 21187  | -1424      | -2705 | -2433 | N |
| ATOM   | 791 | CA  | ARG | B | 27 | 75.999 | 43.799 | 37.941 | 1.00162.93 |       |       | C |
| ANISOU | 791 | CA  | ARG | B | 27 | 24132  | 15782  | 21993  | -1475      | -2725 | -2410 | C |
| ATOM   | 792 | CB  | ARG | B | 27 | 77.170 | 44.547 | 38.583 | 1.00179.13 |       |       | C |
| ANISOU | 792 | CB  | ARG | B | 27 | 26092  | 17671  | 24300  | -1515      | -2765 | -2428 | C |
| ATOM   | 793 | CG  | ARG | B | 27 | 76.840 | 45.428 | 39.778 | 1.00186.84 |       |       | C |
| ANISOU | 793 | CG  | ARG | B | 27 | 26991  | 18516  | 25482  | -1533      | -2805 | -2480 | C |
| ATOM   | 794 | CD  | ARG | B | 27 | 78.059 | 46.228 | 40.231 | 1.00198.21 |       |       | C |
| ANISOU | 794 | CD  | ARG | B | 27 | 28340  | 19788  | 27182  | -1574      | -2848 | -2476 | C |
| ATOM   | 795 | NE  | ARG | B | 27 | 78.185 | 47.498 | 39.518 | 1.00213.25 |       |       | N |
| ANISOU | 795 | NE  | ARG | B | 27 | 30159  | 21525  | 29340  | -1621      | -2870 | -2421 | N |
| ATOM   | 796 | CZ  | ARG | B | 27 | 78.812 | 48.571 | 39.991 | 1.00220.83 |       |       | C |
| ANISOU | 796 | CZ  | ARG | B | 27 | 31017  | 22300  | 30589  | -1658      | -2920 | -2406 | C |
| ATOM   | 797 | NH1 | ARG | B | 27 | 79.381 | 48.541 | 41.188 | 1.00220.99 |       |       | N |
| ANISOU | 797 | NH1 | ARG | B | 27 | 31009  | 22281  | 30675  | -1654      | -2954 | -2453 | N |
| ATOM   | 798 | NH2 | ARG | B | 27 | 78.863 | 49.679 | 39.264 | 1.00225.53 |       |       | N |
| ANISOU | 798 | NH2 | ARG | B | 27 | 31533  | 22746  | 31412  | -1697      | -2938 | -2336 | N |
| ATOM   | 799 | C   | ARG | B | 27 | 76.422 | 43.416 | 36.545 | 1.00151.78 |       |       | C |
| ANISOU | 799 | C   | ARG | B | 27 | 22765  | 14437  | 20469  | -1476      | -2697 | -2342 | C |
| ATOM   | 800 | O   | ARG | B | 27 | 76.030 | 44.042 | 35.571 | 1.00152.15 |       |       | O |
| ANISOU | 800 | O   | ARG | B | 27 | 22792  | 14438  | 20580  | -1499      | -2692 | -2303 | O |
| ATOM   | 801 | N   | ALA | B | 28 | 77.235 | 42.372 | 36.455 | 1.00148.83 |       |       | N |
| ANISOU | 801 | N   | ALA | B | 28 | 22454  | 14170  | 19927  | -1452      | -2679 | -2325 | N |
| ATOM   | 802 | CA  | ALA | B | 28 | 77.717 | 41.920 | 35.163 | 1.00149.78 |       |       | C |
| ANISOU | 802 | CA  | ALA | B | 28 | 22625  | 14362  | 19924  | -1450      | -2652 | -2258 | C |
| ATOM   | 803 | CB  | ALA | B | 28 | 78.825 | 40.900 | 35.326 | 1.00144.76 |       |       | C |
| ANISOU | 803 | CB  | ALA | B | 28 | 22039  | 13809  | 19154  | -1430      | -2640 | -2246 | C |
| ATOM   | 804 | C   | ALA | B | 28 | 76.579 | 41.332 | 34.375 | 1.00144.61 |       |       | C |
| ANISOU | 804 | C   | ALA | B | 28 | 22062  | 13850  | 19035  | -1416      | -2617 | -2220 | C |
| ATOM   | 805 | O   | ALA | B | 28 | 76.313 | 41.739 | 33.253 | 1.00144.99 |       |       | O |
| ANISOU | 805 | O   | ALA | B | 28 | 22109  | 13885  | 19094  | -1433      | -2607 | -2175 | O |
| ATOM   | 806 | N   | ALA | B | 29 | 75.888 | 40.374 | 34.966 | 1.00144.69 |       |       | N |
| ANISOU | 806 | N   | ALA | B | 29 | 22149  | 13989  | 18836  | -1368      | -2596 | -2231 | N |
| ATOM   | 807 | CA  | ALA | B | 29 | 74.783 | 39.763 | 34.241 | 1.00130.97 |       |       | C |
| ANISOU | 807 | CA  | ALA | B | 29 | 20505  | 12387  | 16870  | -1334      | -2557 | -2183 | C |

|        |     |     |     |   |    |        |        |        |                   |   |
|--------|-----|-----|-----|---|----|--------|--------|--------|-------------------|---|
| ATOM   | 808 | CB  | ALA | B | 29 | 73.948 | 38.893 | 35.157 | 1.00129.94        | C |
| ANISOU | 808 | CB  | ALA | B | 29 | 20437  | 12359  | 16576  | -1289 -2537 -2199 | C |
| ATOM   | 809 | C   | ALA | B | 29 | 73.925 | 40.840 | 33.595 | 1.00129.10        | C |
| ANISOU | 809 | C   | ALA | B | 29 | 20221  | 12072  | 16760  | -1361 -2569 -2182 | C |
| ATOM   | 810 | O   | ALA | B | 29 | 73.731 | 40.845 | 32.374 | 1.00135.29        | O |
| ANISOU | 810 | O   | ALA | B | 29 | 21041  | 12897  | 17465  | -1366 -2549 -2125 | O |
| ATOM   | 811 | N   | GLY | B | 30 | 73.414 | 41.755 | 34.413 | 1.00133.50        | N |
| ANISOU | 811 | N   | GLY | B | 30 | 20696  | 12511  | 17516  | -1381 -2601 -2241 | N |
| ATOM   | 812 | CA  | GLY | B | 30 | 72.609 | 42.847 | 33.903 | 1.00124.42        | C |
| ANISOU | 812 | CA  | GLY | B | 30 | 19491  | 11268  | 16515  | -1411 -2612 -2240 | C |
| ATOM   | 813 | C   | GLY | B | 30 | 73.409 | 43.660 | 32.904 | 1.00123.02        | C |
| ANISOU | 813 | C   | GLY | B | 30 | 19251  | 10976  | 16516  | -1461 -2620 -2199 | C |
| ATOM   | 814 | O   | GLY | B | 30 | 72.870 | 44.139 | 31.914 | 1.00126.22        | O |
| ANISOU | 814 | O   | GLY | B | 30 | 19651  | 11363  | 16944  | -1478 -2610 -2158 | O |
| ATOM   | 815 | N   | ALA | B | 31 | 74.705 | 43.801 | 33.175 | 1.00128.61        | N |
| ANISOU | 815 | N   | ALA | B | 31 | 19909  | 11603  | 17355  | -1486 -2637 -2202 | N |
| ATOM   | 816 | CA  | ALA | B | 31 | 75.611 | 44.579 | 32.335 | 1.00130.18        | C |
| ANISOU | 816 | CA  | ALA | B | 31 | 20037  | 11672  | 17752  | -1537 -2645 -2153 | C |
| ATOM   | 817 | CB  | ALA | B | 31 | 76.985 | 44.649 | 32.970 | 1.00138.86        | C |
| ANISOU | 817 | CB  | ALA | B | 31 | 21084  | 12687  | 18988  | -1557 -2667 -2168 | C |
| ATOM   | 818 | C   | ALA | B | 31 | 75.726 | 44.032 | 30.912 | 1.00134.23        | C |
| ANISOU | 818 | C   | ALA | B | 31 | 20620  | 12291  | 18089  | -1530 -2613 -2083 | C |
| ATOM   | 819 | O   | ALA | B | 31 | 75.697 | 44.805 | 29.948 | 1.00133.87        | O |
| ANISOU | 819 | O   | ALA | B | 31 | 20527  | 12156  | 18182  | -1570 -2609 -2031 | O |
| ATOM   | 820 | N   | ALA | B | 32 | 75.876 | 42.712 | 30.782 | 1.00132.93        | N |
| ANISOU | 820 | N   | ALA | B | 32 | 20568  | 12310  | 17629  | -1481 -2587 -2070 | N |
| ATOM   | 821 | CA  | ALA | B | 32 | 76.012 | 42.075 | 29.468 | 1.00121.87        | C |
| ANISOU | 821 | CA  | ALA | B | 32 | 19251  | 11026  | 16029  | -1470 -2555 -1998 | C |
| ATOM   | 822 | CB  | ALA | B | 32 | 76.234 | 40.583 | 29.610 | 1.00118.18        | C |
| ANISOU | 822 | CB  | ALA | B | 32 | 18908  | 10746  | 15251  | -1416 -2523 -1980 | C |
| ATOM   | 823 | C   | ALA | B | 32 | 74.786 | 42.343 | 28.603 | 1.00121.64        | C |
| ANISOU | 823 | C   | ALA | B | 32 | 19252  | 11036  | 15929  | -1468 -2538 -1965 | C |
| ATOM   | 824 | O   | ALA | B | 32 | 74.917 | 42.688 | 27.424 | 1.00133.77        | O |
| ANISOU | 824 | O   | ALA | B | 32 | 20782  | 12550  | 17495  | -1496 -2528 -1908 | O |
| ATOM   | 825 | N   | THR | B | 33 | 73.605 | 42.182 | 29.200 | 1.00114.95        | N |
| ANISOU | 825 | N   | THR | B | 33 | 18438  | 10245  | 14994  | -1437 -2533 -1999 | N |
| ATOM   | 826 | CA  | THR | B | 33 | 72.338 | 42.424 | 28.520 | 1.00111.90        | C |
| ANISOU | 826 | CA  | THR | B | 33 | 18082  | 9898   | 14536  | -1431 -2518 -1975 | C |
| ATOM   | 827 | CB  | THR | B | 33 | 71.167 | 42.414 | 29.501 | 1.00110.32        | C |
| ANISOU | 827 | CB  | THR | B | 33 | 17889  | 9720   | 14308  | -1403 -2523 -2027 | C |
| ATOM   | 828 | OG1 | THR | B | 33 | 71.081 | 41.128 | 30.125 | 1.00111.98        | O |
| ANISOU | 828 | OG1 | THR | B | 33 | 18196  | 10078  | 14272  | -1350 -2497 -2027 | O |
| ATOM   | 829 | CG2 | THR | B | 33 | 69.863 | 42.740 | 28.779 | 1.00111.89        | C |
| ANISOU | 829 | CG2 | THR | B | 33 | 18113  | 9950   | 14449  | -1401 -2508 -2001 | C |
| ATOM   | 830 | C   | THR | B | 33 | 72.357 | 43.762 | 27.803 | 1.00116.91        | C |
| ANISOU | 830 | C   | THR | B | 33 | 18611  | 10365  | 15446  | -1492 -2535 -1954 | C |
| ATOM   | 831 | O   | THR | B | 33 | 71.977 | 43.854 | 26.637 | 1.00120.97        | O |
| ANISOU | 831 | O   | THR | B | 33 | 19155  | 10914  | 15896  | -1502 -2516 -1896 | O |
| ATOM   | 832 | N   | VAL | B | 34 | 72.836 | 44.766 | 28.511 | 1.00123.77        | N |
| ANISOU | 832 | N   | VAL | B | 34 | 19358  | 11048  | 16622  | -1534 -2566 -1989 | N |
| ATOM   | 833 | CA  | VAL | B | 34 | 72.944 | 46.109 | 27.993 | 1.00129.28        | C |
| ANISOU | 833 | CA  | VAL | B | 34 | 19940  | 11547  | 17632  | -1598 -2575 -1950 | C |
| ATOM   | 834 | CB  | VAL | B | 34 | 73.453 | 47.058 | 29.069 | 1.00134.06        | C |
| ANISOU | 834 | CB  | VAL | B | 34 | 20429  | 11960  | 18547  | -1634 -2608 -1984 | C |
| ATOM   | 835 | CG1 | VAL | B | 34 | 73.127 | 48.483 | 28.683 | 1.00136.80        | C |
| ANISOU | 835 | CG1 | VAL | B | 34 | 20667  | 12104  | 19208  | -1691 -2612 -1929 | C |
| ATOM   | 836 | CG2 | VAL | B | 34 | 72.823 | 46.720 | 30.407 | 1.00135.57        | C |
| ANISOU | 836 | CG2 | VAL | B | 34 | 20647  | 12208  | 18657  | -1594 -2625 -2072 | C |
| ATOM   | 837 | C   | VAL | B | 34 | 73.906 | 46.146 | 26.823 | 1.00130.33        | C |
| ANISOU | 837 | C   | VAL | B | 34 | 20061  | 11651  | 17807  | -1631 -2560 -1868 | C |
| ATOM   | 838 | O   | VAL | B | 34 | 73.679 | 46.838 | 25.843 | 1.00139.18        | O |
| ANISOU | 838 | O   | VAL | B | 34 | 21138  | 12688  | 19053  | -1670 -2545 -1798 | O |
| ATOM   | 839 | N   | LEU | B | 35 | 74.993 | 45.405 | 26.935 | 1.00127.15        | N |

|        |     |     |     |   |    |        |        |        |            |       |       |   |
|--------|-----|-----|-----|---|----|--------|--------|--------|------------|-------|-------|---|
| ANISOU | 839 | N   | LEU | B | 35 | 19694  | 11309  | 17306  | -1617      | -2560 | -1870 | N |
| ATOM   | 840 | CA  | LEU | B | 35 | 75.980 | 45.328 | 25.863 | 1.00125.00 |       |       | C |
| ANISOU | 840 | CA  | LEU | B | 35 | 19419  | 11022  | 17055  | -1645      | -2545 | -1794 | C |
| ATOM   | 841 | CB  | LEU | B | 35 | 77.293 | 44.713 | 26.365 | 1.00121.42 |       |       | C |
| ANISOU | 841 | CB  | LEU | B | 35 | 18976  | 10592  | 16567  | -1635      | -2555 | -1813 | C |
| ATOM   | 842 | CG  | LEU | B | 35 | 78.454 | 44.623 | 25.357 | 1.00119.03 |       |       | C |
| ANISOU | 842 | CG  | LEU | B | 35 | 18664  | 10265  | 16299  | -1666      | -2542 | -1735 | C |
| ATOM   | 843 | CD1 | LEU | B | 35 | 78.852 | 45.983 | 24.783 | 1.00118.89 |       |       | C |
| ANISOU | 843 | CD1 | LEU | B | 35 | 18509  | 10010  | 16655  | -1741      | -2538 | -1647 | C |
| ATOM   | 844 | CD2 | LEU | B | 35 | 79.668 | 43.924 | 25.957 | 1.00121.22 |       |       | C |
| ANISOU | 844 | CD2 | LEU | B | 35 | 18962  | 10581  | 16514  | -1650      | -2552 | -1763 | C |
| ATOM   | 845 | C   | LEU | B | 35 | 75.427 | 44.519 | 24.684 | 1.00124.13 |       |       | C |
| ANISOU | 845 | C   | LEU | B | 35 | 19426  | 11092  | 16644  | -1616      | -2515 | -1747 | C |
| ATOM   | 846 | O   | LEU | B | 35 | 75.728 | 44.816 | 23.524 | 1.00119.08 |       |       | O |
| ANISOU | 846 | O   | LEU | B | 35 | 18768  | 10413  | 16064  | -1652      | -2499 | -1668 | O |
| ATOM   | 847 | N   | LEU | B | 36 | 74.574 | 43.539 | 24.979 | 1.00119.80 |       |       | N |
| ANISOU | 847 | N   | LEU | B | 36 | 18998  | 10733  | 15789  | -1555      | -2502 | -1782 | N |
| ATOM   | 848 | CA  | LEU | B | 36 | 73.978 | 42.705 | 23.936 | 1.00114.33 |       |       | C |
| ANISOU | 848 | CA  | LEU | B | 36 | 18433  | 10222  | 14785  | -1523      | -2467 | -1728 | C |
| ATOM   | 849 | CB  | LEU | B | 36 | 73.221 | 41.521 | 24.541 | 1.00108.14 |       |       | C |
| ANISOU | 849 | CB  | LEU | B | 36 | 17776  | 9625   | 13687  | -1454      | -2440 | -1751 | C |
| ATOM   | 850 | CG  | LEU | B | 36 | 72.710 | 40.523 | 23.498 | 1.00 93.90 |       |       | C |
| ANISOU | 850 | CG  | LEU | B | 36 | 16118  | 8011   | 11549  | -1420      | -2386 | -1676 | C |
| ATOM   | 851 | CD1 | LEU | B | 36 | 73.883 | 39.974 | 22.701 | 1.00 86.32 |       |       | C |
| ANISOU | 851 | CD1 | LEU | B | 36 | 15203  | 7102   | 10495  | -1430      | -2366 | -1619 | C |
| ATOM   | 852 | CD2 | LEU | B | 36 | 71.922 | 39.393 | 24.141 | 1.00 82.38 |       |       | C |
| ANISOU | 852 | CD2 | LEU | B | 36 | 14769  | 6703   | 9830   | -1360      | -2344 | -1676 | C |
| ATOM   | 853 | C   | LEU | B | 36 | 73.036 | 43.509 | 23.065 | 1.00106.21 |       |       | C |
| ANISOU | 853 | C   | LEU | B | 36 | 17373  | 9140   | 13842  | -1552      | -2461 | -1690 | C |
| ATOM   | 854 | O   | LEU | B | 36 | 73.206 | 43.570 | 21.847 | 1.00106.75 |       |       | O |
| ANISOU | 854 | O   | LEU | B | 36 | 17459  | 9222   | 13880  | -1577      | -2444 | -1618 | O |
| ATOM   | 855 | N   | VAL | B | 37 | 72.041 | 44.112 | 23.710 | 1.00107.06 |       |       | N |
| ANISOU | 855 | N   | VAL | B | 37 | 17435  | 9185   | 14058  | -1551      | -2475 | -1737 | N |
| ATOM   | 856 | CA  | VAL | B | 37 | 71.044 | 44.940 | 23.045 | 1.00106.59 |       |       | C |
| ANISOU | 856 | CA  | VAL | B | 37 | 17336  | 9061   | 14102  | -1579      | -2470 | -1706 | C |
| ATOM   | 857 | CB  | VAL | B | 37 | 70.042 | 45.508 | 24.066 | 1.00103.16 |       |       | C |
| ANISOU | 857 | CB  | VAL | B | 37 | 16853  | 8562   | 13782  | -1571      | -2488 | -1773 | C |
| ATOM   | 858 | CG1 | VAL | B | 37 | 69.048 | 46.439 | 23.398 | 1.00105.29 |       |       | C |
| ANISOU | 858 | CG1 | VAL | B | 37 | 17073  | 8747   | 14187  | -1604      | -2481 | -1737 | C |
| ATOM   | 859 | CG2 | VAL | B | 37 | 69.298 | 44.364 | 24.746 | 1.00 99.59 |       |       | C |
| ANISOU | 859 | CG2 | VAL | B | 37 | 16524  | 8304   | 13011  | -1499      | -2477 | -1818 | C |
| ATOM   | 860 | C   | VAL | B | 37 | 71.726 | 46.059 | 22.247 | 1.00114.28 |       |       | C |
| ANISOU | 860 | C   | VAL | B | 37 | 18185  | 9832   | 15405  | -1655      | -2468 | -1630 | C |
| ATOM   | 861 | O   | VAL | B | 37 | 71.199 | 46.518 | 21.234 | 1.00122.62 |       |       | O |
| ANISOU | 861 | O   | VAL | B | 37 | 19226  | 10856  | 16507  | -1684      | -2449 | -1562 | O |
| ATOM   | 862 | N   | ILE | B | 38 | 72.919 | 46.465 | 22.677 | 1.00117.40 |       |       | N |
| ANISOU | 862 | N   | ILE | B | 38 | 18489  | 10085  | 16030  | -1688      | -2481 | -1625 | N |
| ATOM   | 863 | CA  | ILE | B | 38 | 73.675 | 47.472 | 21.931 | 1.00121.41 |       |       | C |
| ANISOU | 863 | CA  | ILE | B | 38 | 18878  | 10387  | 16867  | -1760      | -2464 | -1516 | C |
| ATOM   | 864 | CB  | ILE | B | 38 | 74.840 | 48.072 | 22.760 | 1.00124.73 |       |       | C |
| ANISOU | 864 | CB  | ILE | B | 38 | 19190  | 10628  | 17574  | -1793      | -2482 | -1514 | C |
| ATOM   | 865 | CG1 | ILE | B | 38 | 74.314 | 48.923 | 23.915 | 1.00129.08 |       |       | C |
| ANISOU | 865 | CG1 | ILE | B | 38 | 19664  | 11048  | 18333  | -1800      | -2507 | -1567 | C |
| ATOM   | 866 | CD1 | ILE | B | 38 | 75.391 | 49.310 | 24.924 | 1.00133.61 |       |       | C |
| ANISOU | 866 | CD1 | ILE | B | 38 | 20161  | 11490  | 19116  | -1817      | -2536 | -1586 | C |
| ATOM   | 867 | CG2 | ILE | B | 38 | 75.718 | 48.953 | 21.884 | 1.00118.21 |       |       | C |
| ANISOU | 867 | CG2 | ILE | B | 38 | 18255  | 9603   | 17057  | -1861      | -2452 | -1360 | C |
| ATOM   | 868 | C   | ILE | B | 38 | 74.254 | 46.857 | 20.651 | 1.00117.24 |       |       | C |
| ANISOU | 868 | C   | ILE | B | 38 | 18411  | 9952   | 16184  | -1767      | -2439 | -1435 | C |
| ATOM   | 869 | O   | ILE | B | 38 | 74.086 | 47.417 | 19.562 | 1.00114.35 |       |       | O |
| ANISOU | 869 | O   | ILE | B | 38 | 18001  | 9504   | 15945  | -1811      | -2408 | -1323 | O |
| ATOM   | 870 | N   | VAL | B | 39 | 74.898 | 45.696 | 20.791 | 1.00113.72 |       |       | N |
| ANISOU | 870 | N   | VAL | B | 39 | 18068  | 9676   | 15463  | -1724      | -2448 | -1480 | N |

|        |     |     |     |   |    |        |        |        |                   |   |
|--------|-----|-----|-----|---|----|--------|--------|--------|-------------------|---|
| ATOM   | 871 | CA  | VAL | B | 39 | 75.501 | 44.972 | 19.666 | 1.00112.77        | C |
| ANISOU | 871 | CA  | VAL | B | 39 | 18027  | 9670   | 15152  | -1725 -2427 -1413 | C |
| ATOM   | 872 | CB  | VAL | B | 39 | 76.213 | 43.680 | 20.142 | 1.00107.02        | C |
| ANISOU | 872 | CB  | VAL | B | 39 | 17414  | 9121   | 14130  | -1669 -2432 -1468 | C |
| ATOM   | 873 | CG1 | VAL | B | 39 | 76.714 | 42.850 | 18.955 | 1.00 94.87        | C |
| ANISOU | 873 | CG1 | VAL | B | 39 | 15979  | 7724   | 12345  | -1665 -2405 -1398 | C |
| ATOM   | 874 | CG2 | VAL | B | 39 | 77.368 | 44.026 | 21.063 | 1.00110.81        | C |
| ANISOU | 874 | CG2 | VAL | B | 39 | 17795  | 9459   | 14848  | -1690 -2455 -1499 | C |
| ATOM   | 875 | C   | VAL | B | 39 | 74.473 | 44.615 | 18.589 | 1.00110.71        | C |
| ANISOU | 875 | C   | VAL | B | 39 | 17865  | 9551   | 14650  | -1711 -2403 -1371 | C |
| ATOM   | 876 | O   | VAL | B | 39 | 74.780 | 44.640 | 17.390 | 1.00107.89        | O |
| ANISOU | 876 | O   | VAL | B | 39 | 17514  | 9191   | 14287  | -1746 -2380 -1275 | O |
| ATOM   | 877 | N   | LEU | B | 40 | 73.258 | 44.273 | 19.008 | 1.00104.81        | N |
| ANISOU | 877 | N   | LEU | B | 40 | 17196  | 8924   | 13703  | -1663 -2405 -1432 | N |
| ATOM   | 878 | CA  | LEU | B | 40 | 72.212 | 43.962 | 18.047 | 1.00 95.27        | C |
| ANISOU | 878 | CA  | LEU | B | 40 | 16085  | 7850   | 12262  | -1649 -2380 -1392 | C |
| ATOM   | 879 | CB  | LEU | B | 40 | 70.924 | 43.514 | 18.734 | 1.00 84.30        | C |
| ANISOU | 879 | CB  | LEU | B | 40 | 14780  | 6589   | 10662  | -1589 -2376 -1457 | C |
| ATOM   | 880 | CG  | LEU | B | 40 | 70.958 | 42.262 | 19.608 | 1.00 80.28        | C |
| ANISOU | 880 | CG  | LEU | B | 40 | 14387  | 6248   | 9868   | -1519 -2358 -1503 | C |
| ATOM   | 881 | CD1 | LEU | B | 40 | 69.562 | 41.984 | 20.142 | 1.00 80.68        | C |
| ANISOU | 881 | CD1 | LEU | B | 40 | 14499  | 6387   | 9771   | -1473 -2342 -1535 | C |
| ATOM   | 882 | CD2 | LEU | B | 40 | 71.496 | 41.077 | 18.840 | 1.00 71.80        | C |
| ANISOU | 882 | CD2 | LEU | B | 40 | 13448  | 5350   | 8485   | -1494 -2310 -1441 | C |
| ATOM   | 883 | C   | LEU | B | 40 | 71.947 | 45.183 | 17.182 | 1.00104.68        | C |
| ANISOU | 883 | C   | LEU | B | 40 | 17156  | 8856   | 13763  | -1721 -2372 -1304 | C |
| ATOM   | 884 | O   | LEU | B | 40 | 71.942 | 45.091 | 15.958 | 1.00114.64        | O |
| ANISOU | 884 | O   | LEU | B | 40 | 18452  | 10157  | 14950  | -1747 -2347 -1215 | O |
| ATOM   | 885 | N   | LEU | B | 41 | 71.742 | 46.326 | 17.821 | 1.00109.36        | N |
| ANISOU | 885 | N   | LEU | B | 41 | 17605  | 9235   | 14713  | -1755 -2382 -1309 | N |
| ATOM   | 886 | CA  | LEU | B | 41 | 71.473 | 47.558 | 17.088 | 1.00113.88        | C |
| ANISOU | 886 | CA  | LEU | B | 41 | 18046  | 9593   | 15629  | -1824 -2350 -1184 | C |
| ATOM   | 887 | CB  | LEU | B | 41 | 71.206 | 48.709 | 18.063 | 1.00118.45        | C |
| ANISOU | 887 | CB  | LEU | B | 41 | 18491  | 9957   | 16557  | -1848 -2355 -1199 | C |
| ATOM   | 888 | CG  | LEU | B | 41 | 70.078 | 48.530 | 19.079 | 1.00111.89        | C |
| ANISOU | 888 | CG  | LEU | B | 41 | 17712  | 9222   | 15579  | -1798 -2389 -1338 | C |
| ATOM   | 889 | CD1 | LEU | B | 41 | 69.958 | 49.775 | 19.931 | 1.00113.22        | C |
| ANISOU | 889 | CD1 | LEU | B | 41 | 17742  | 9157   | 16120  | -1833 -2393 -1331 | C |
| ATOM   | 890 | CD2 | LEU | B | 41 | 68.753 | 48.215 | 18.405 | 1.00101.91        | C |
| ANISOU | 890 | CD2 | LEU | B | 41 | 16541  | 8104   | 14077  | -1773 -2380 -1339 | C |
| ATOM   | 891 | C   | LEU | B | 41 | 72.636 | 47.920 | 16.158 | 1.00115.70        | C |
| ANISOU | 891 | C   | LEU | B | 41 | 18195  | 9683   | 16083  | -1884 -2309 -1023 | C |
| ATOM   | 892 | O   | LEU | B | 41 | 72.423 | 48.275 | 14.995 | 1.00116.31        | O |
| ANISOU | 892 | O   | LEU | B | 41 | 18243  | 9701   | 16247  | -1924 -2260 -871  | O |
| ATOM   | 893 | N   | ALA | B | 42 | 73.859 | 47.804 | 16.672 | 1.00118.26        | N |
| ANISOU | 893 | N   | ALA | B | 42 | 18483  | 9953   | 16499  | -1888 -2320 -1038 | N |
| ATOM   | 894 | CA  | ALA | B | 42 | 75.064 | 48.098 | 15.901 | 1.00114.03        | C |
| ANISOU | 894 | CA  | ALA | B | 42 | 17869  | 9282   | 16175  | -1939 -2276 -874  | C |
| ATOM   | 895 | CB  | ALA | B | 42 | 76.292 | 48.022 | 16.782 | 1.00117.36        | C |
| ANISOU | 895 | CB  | ALA | B | 42 | 18251  | 9645   | 16697  | -1937 -2302 -925  | C |
| ATOM   | 896 | C   | ALA | B | 42 | 75.196 | 47.139 | 14.730 | 1.00117.33        | C |
| ANISOU | 896 | C   | ALA | B | 42 | 18404  | 9885   | 16291  | -1932 -2263 -831  | C |
| ATOM   | 897 | O   | ALA | B | 42 | 75.440 | 47.553 | 13.593 | 1.00117.45        | O |
| ANISOU | 897 | O   | ALA | B | 42 | 18358  | 9793   | 16473  | -1980 -2199 -626  | O |
| ATOM   | 898 | N   | GLY | B | 43 | 75.040 | 45.854 | 15.029 | 1.00117.20        | N |
| ANISOU | 898 | N   | GLY | B | 43 | 18558  | 10142  | 15829  | -1867 -2309 -989  | N |
| ATOM   | 899 | CA  | GLY | B | 43 | 75.122 | 44.809 | 14.025 | 1.00112.25        | C |
| ANISOU | 899 | CA  | GLY | B | 43 | 18081  | 9733   | 14837  | -1850 -2300 -968  | C |
| ATOM   | 900 | C   | GLY | B | 43 | 74.035 | 44.941 | 12.977 | 1.00108.40        | C |
| ANISOU | 900 | C   | GLY | B | 43 | 17636  | 9299   | 14251  | -1867 -2274 -893  | C |
| ATOM   | 901 | O   | GLY | B | 43 | 74.306 | 44.786 | 11.786 | 1.00111.05        | O |
| ANISOU | 901 | O   | GLY | B | 43 | 17994  | 9656   | 14542  | -1905 -2239 -767  | O |
| ATOM   | 902 | N   | SER | B | 44 | 72.809 | 45.224 | 13.422 | 1.00103.75        | N |



|        |     |     |     |   |    |        |        |        |            |       |       |   |
|--------|-----|-----|-----|---|----|--------|--------|--------|------------|-------|-------|---|
| ANISOU | 902 | N   | SER | B | 44 | 17058  | 8731   | 13634  | -1843      | -2287 | -961  | N |
| ATOM   | 903 | CA  | SER | B | 44 | 71.679 | 45.434 | 12.518 | 1.00106.34 |       |       | C |
| ANISOU | 903 | CA  | SER | B | 44 | 17419  | 9099   | 13887  | -1860      | -2263 | -896  | C |
| ATOM   | 904 | CB  | SER | B | 44 | 70.418 | 45.834 | 13.291 | 1.00106.69 |       |       | C |
| ANISOU | 904 | CB  | SER | B | 44 | 17453  | 9136   | 13947  | -1829      | -2283 | -987  | C |
| ATOM   | 905 | OG  | SER | B | 44 | 69.653 | 44.700 | 13.656 | 1.00       | 94.06 |       | O |
| ANISOU | 905 | OG  | SER | B | 44 | 16038  | 7815   | 11885  | -1748      | -2295 | -1106 | O |
| ATOM   | 906 | C   | SER | B | 44 | 71.981 | 46.491 | 11.467 | 1.00115.69 |       |       | C |
| ANISOU | 906 | C   | SER | B | 44 | 18444  | 10028  | 15485  | -1944      | -2196 | -650  | C |
| ATOM   | 907 | O   | SER | B | 44 | 71.754 | 46.271 | 10.274 | 1.00114.23 |       |       | O |
| ANISOU | 907 | O   | SER | B | 44 | 18309  | 9903   | 15188  | -1970      | -2157 | -522  | O |
| ATOM   | 908 | N   | TYR | B | 45 | 72.462 | 47.647 | 11.921 | 1.00118.77 |       |       | N |
| ANISOU | 908 | N   | TYR | B | 45 | 18644  | 10129  | 16353  | -1980      | -2158 | -539  | N |
| ATOM   | 909 | CA  | TYR | B | 45 | 72.818 | 48.743 | 11.027 | 1.00124.85 |       |       | C |
| ANISOU | 909 | CA  | TYR | B | 45 | 19249  | 10629  | 17561  | -2035      | -2042 | -199  | C |
| ATOM   | 910 | CB  | TYR | B | 45 | 73.201 | 49.998 | 11.819 | 1.00135.37 |       |       | C |
| ANISOU | 910 | CB  | TYR | B | 45 | 20412  | 11686  | 19336  | -2055      | -2009 | -113  | C |
| ATOM   | 911 | CG  | TYR | B | 45 | 73.623 | 51.175 | 10.952 | 1.00153.08 |       |       | C |
| ANISOU | 911 | CG  | TYR | B | 45 | 22501  | 13669  | 21991  | -2083      | -1871 | 306   | C |
| ATOM   | 912 | CD1 | TYR | B | 45 | 74.922 | 51.270 | 10.447 | 1.00158.39 |       |       | C |
| ANISOU | 912 | CD1 | TYR | B | 45 | 23131  | 14239  | 22810  | -2098      | -1851 | 551   | C |
| ATOM   | 913 | CE1 | TYR | B | 45 | 75.310 | 52.339 | 9.649  | 1.00167.87 |       |       | C |
| ANISOU | 913 | CE1 | TYR | B | 45 | 24237  | 15196  | 24349  | -2125      | -1907 | 1038  | C |
| ATOM   | 914 | CZ  | TYR | B | 45 | 74.401 | 53.338 | 9.351  | 1.00175.10 |       |       | C |
| ANISOU | 914 | CZ  | TYR | B | 45 | 25072  | 15990  | 25467  | -2125      | -1909 | 1261  | C |
| ATOM   | 915 | OH  | TYR | B | 45 | 74.800 | 54.400 | 8.562  | 1.00179.56 |       |       | O |
| ANISOU | 915 | OH  | TYR | B | 45 | 25471  | 16381  | 26374  | -2125      | -1953 | 1774  | O |
| ATOM   | 916 | CE2 | TYR | B | 45 | 73.107 | 53.273 | 9.842  | 1.00169.63 |       |       | C |
| ANISOU | 916 | CE2 | TYR | B | 45 | 24429  | 15383  | 24638  | -2112      | -1861 | 986   | C |
| ATOM   | 917 | CD2 | TYR | B | 45 | 72.724 | 52.193 | 10.638 | 1.00162.57 |       |       | C |
| ANISOU | 917 | CD2 | TYR | B | 45 | 23627  | 14737  | 23407  | -2086      | -1804 | 503   | C |
| ATOM   | 918 | C   | TYR | B | 45 | 73.961 | 48.336 | 10.103 | 1.00121.24 |       |       | C |
| ANISOU | 918 | C   | TYR | B | 45 | 18867  | 10133  | 17064  | -2074      | -2088 | 20    | C |
| ATOM   | 919 | O   | TYR | B | 45 | 73.921 | 48.611 | 8.904  | 1.00135.09 |       |       | O |
| ANISOU | 919 | O   | TYR | B | 45 | 20769  | 11729  | 18831  | -2155      | -2260 | 412   | O |
| ATOM   | 920 | N   | LEU | B | 46 | 74.995 | 47.724 | 10.670 | 1.00113.95 |       |       | N |
| ANISOU | 920 | N   | LEU | B | 46 | 17908  | 9316   | 16073  | -2042      | -2041 | -153  | N |
| ATOM   | 921 | CA  | LEU | B | 46 | 76.144 | 47.314 | 9.875  | 1.00117.73 |       |       | C |
| ANISOU | 921 | CA  | LEU | B | 46 | 18508  | 9739   | 16486  | -2092      | -2148 | 58    | C |
| ATOM   | 922 | CB  | LEU | B | 46 | 77.295 | 46.866 | 10.779 | 1.00122.37 |       |       | C |
| ANISOU | 922 | CB  | LEU | B | 46 | 18988  | 10412  | 17095  | -2046      | -2055 | -158  | C |
| ATOM   | 923 | CG  | LEU | B | 46 | 78.016 | 47.978 | 11.543 | 1.00131.24 |       |       | C |
| ANISOU | 923 | CG  | LEU | B | 46 | 19939  | 11266  | 18659  | -2065      | -2024 | -68   | C |
| ATOM   | 924 | CD1 | LEU | B | 46 | 79.040 | 47.402 | 12.501 | 1.00121.39 |       |       | C |
| ANISOU | 924 | CD1 | LEU | B | 46 | 18727  | 10081  | 17317  | -2048      | -2098 | -265  | C |
| ATOM   | 925 | CD2 | LEU | B | 46 | 78.691 | 48.928 | 10.562 | 1.00139.32 |       |       | C |
| ANISOU | 925 | CD2 | LEU | B | 46 | 20830  | 12047  | 20056  | -2097      | -1910 | 366   | C |
| ATOM   | 926 | C   | LEU | B | 46 | 75.807 | 46.211 | 8.878  | 1.00116.87 |       |       | C |
| ANISOU | 926 | C   | LEU | B | 46 | 18772  | 9805   | 15829  | -2142      | -2350 | 92    | C |
| ATOM   | 927 | O   | LEU | B | 46 | 76.458 | 46.092 | 7.842  | 1.00121.74 |       |       | O |
| ANISOU | 927 | O   | LEU | B | 46 | 19565  | 10315  | 16374  | -2232      | -2488 | 423   | O |
| ATOM   | 928 | N   | ALA | B | 47 | 74.784 | 45.419 | 9.180  | 1.00114.90 |       |       | N |
| ANISOU | 928 | N   | ALA | B | 47 | 18634  | 9848   | 15175  | -2081      | -2329 | -211  | N |
| ATOM   | 929 | CA  | ALA | B | 47 | 74.386 | 44.337 | 8.286  | 1.00112.64 |       |       | C |
| ANISOU | 929 | CA  | ALA | B | 47 | 18752  | 9774   | 14274  | -2123      | -2465 | -216  | C |
| ATOM   | 930 | CB  | ALA | B | 47 | 73.435 | 43.387 | 8.992  | 1.00       | 99.09 |       | C |
| ANISOU | 930 | CB  | ALA | B | 47 | 16985  | 8463   | 12201  | -1978      | -2323 | -575  | C |
| ATOM   | 931 | C   | ALA | B | 47 | 73.743 | 44.894 | 7.015  | 1.00113.37 |       |       | C |
| ANISOU | 931 | C   | ALA | B | 47 | 19097  | 9658   | 14323  | -2267      | -2631 | 170   | C |
| ATOM   | 932 | O   | ALA | B | 47 | 74.108 | 44.500 | 5.907  | 1.00112.91 |       |       | O |
| ANISOU | 932 | O   | ALA | B | 47 | 19346  | 9573   | 13982  | -2385      | -2746 | 450   | O |
| ATOM   | 933 | N   | VAL | B | 48 | 72.795 | 45.816 | 7.179  | 1.00115.54 |       |       | N |
| ANISOU | 933 | N   | VAL | B | 48 | 19209  | 9798   | 14892  | -2257      | -2604 | 241   | N |

|        |     |     |     |   |    |        |        |        |                  |   |
|--------|-----|-----|-----|---|----|--------|--------|--------|------------------|---|
| ATOM   | 934 | CA  | VAL | B | 48 | 72.131 | 46.435 | 6.036  | 1.00114.76       | C |
| ANISOU | 934 | CA  | VAL | B | 48 | 19243  | 9526   | 14835  | -2365 -2711 696  | C |
| ATOM   | 935 | CB  | VAL | B | 48 | 71.049 | 47.440 | 6.469  | 1.00118.53       | C |
| ANISOU | 935 | CB  | VAL | B | 48 | 19488  | 9888   | 15660  | -2320 -2650 688  | C |
| ATOM   | 936 | CG1 | VAL | B | 48 | 70.565 | 48.243 | 5.277  | 1.00130.37       | C |
| ANISOU | 936 | CG1 | VAL | B | 48 | 20986  | 11226  | 17324  | -2393 -2713 1301 | C |
| ATOM   | 937 | CG2 | VAL | B | 48 | 69.886 | 46.730 | 7.132  | 1.00121.18       | C |
| ANISOU | 937 | CG2 | VAL | B | 48 | 19937  | 10512  | 15593  | -2246 -2607 203  | C |
| ATOM   | 938 | C   | VAL | B | 48 | 73.145 | 47.160 | 5.170  | 1.00120.74       | C |
| ANISOU | 938 | C   | VAL | B | 48 | 19839  | 10065  | 15974  | -2414 -2728 1325 | C |
| ATOM   | 939 | O   | VAL | B | 48 | 73.147 | 47.024 | 3.951  | 1.00128.66       | O |
| ANISOU | 939 | O   | VAL | B | 48 | 20990  | 11139  | 16757  | -2469 -2775 1834 | O |
| ATOM   | 940 | N   | LEU | B | 49 | 74.015 | 47.922 | 5.819  | 1.00124.28       | N |
| ANISOU | 940 | N   | LEU | B | 49 | 19929  | 10339  | 16953  | -2353 -2633 1341 | N |
| ATOM   | 941 | CA  | LEU | B | 49 | 75.048 | 48.682 | 5.130  | 1.00131.87       | C |
| ANISOU | 941 | CA  | LEU | B | 49 | 20638  | 11150  | 18316  | -2350 -2604 1920 | C |
| ATOM   | 942 | CB  | LEU | B | 49 | 75.778 | 49.585 | 6.121  | 1.00143.60       | C |
| ANISOU | 942 | CB  | LEU | B | 49 | 21783  | 12443  | 20334  | -2282 -2463 1784 | C |
| ATOM   | 943 | CG  | LEU | B | 49 | 76.974 | 50.354 | 5.566  | 1.00160.28       | C |
| ANISOU | 943 | CG  | LEU | B | 49 | 23627  | 14429  | 22844  | -2258 -2414 2296 | C |
| ATOM   | 944 | CD1 | LEU | B | 49 | 76.538 | 51.559 | 4.724  | 1.00166.96       | C |
| ANISOU | 944 | CD1 | LEU | B | 49 | 24200  | 15209  | 24029  | -2219 -2377 2882 | C |
| ATOM   | 945 | CD2 | LEU | B | 49 | 77.864 | 50.783 | 6.731  | 1.00166.23       | C |
| ANISOU | 945 | CD2 | LEU | B | 49 | 24214  | 15055  | 23891  | -2217 -2281 1986 | C |
| ATOM   | 946 | C   | LEU | B | 49 | 76.036 | 47.787 | 4.381  | 1.00127.93       | C |
| ANISOU | 946 | C   | LEU | B | 49 | 20331  | 10789  | 17489  | -2393 -2668 2129 | C |
| ATOM   | 947 | O   | LEU | B | 49 | 76.412 | 48.086 | 3.244  | 1.00132.64       | O |
| ANISOU | 947 | O   | LEU | B | 49 | 20801  | 11469  | 18127  | -2380 -2657 2777 | O |
| ATOM   | 948 | N   | ALA | B | 50 | 76.468 | 46.704 | 5.015  | 1.00124.02       | N |
| ANISOU | 948 | N   | ALA | B | 50 | 20076  | 10402  | 16645  | -2411 -2697 1614 | N |
| ATOM   | 949 | CA  | ALA | B | 50 | 77.423 | 45.801 | 4.386  | 1.00123.62       | C |
| ANISOU | 949 | CA  | ALA | B | 50 | 20246  | 10480  | 16245  | -2459 -2745 1756 | C |
| ATOM   | 950 | CB  | ALA | B | 50 | 77.993 | 44.819 | 5.427  | 1.00119.45       | C |
| ANISOU | 950 | CB  | ALA | B | 50 | 19842  | 10065  | 15479  | -2432 -2736 1110 | C |
| ATOM   | 951 | C   | ALA | B | 50 | 76.813 | 45.035 | 3.208  | 1.00120.58       | C |
| ANISOU | 951 | C   | ALA | B | 50 | 20113  | 10498  | 15204  | -2454 -2734 1985 | C |
| ATOM   | 952 | O   | ALA | B | 50 | 77.510 | 44.696 | 2.255  | 1.00121.98       | O |
| ANISOU | 952 | O   | ALA | B | 50 | 20119  | 11102  | 15126  | -2343 -2617 2319 | O |
| ATOM   | 953 | N   | GLU | B | 51 | 75.517 | 44.744 | 3.292  | 1.00120.84       | N |
| ANISOU | 953 | N   | GLU | B | 51 | 20340  | 10669  | 14905  | -2458 -2744 1704 | N |
| ATOM   | 954 | CA  | GLU | B | 51 | 74.838 | 43.945 | 2.269  | 1.00114.90       | C |
| ANISOU | 954 | CA  | GLU | B | 51 | 19625  | 10595  | 13436  | -2332 -2618 1752 | C |
| ATOM   | 955 | CB  | GLU | B | 51 | 73.792 | 43.032 | 2.922  | 1.00110.92       | C |
| ANISOU | 955 | CB  | GLU | B | 51 | 19565  | 10131  | 12450  | -2403 -2695 1095 | C |
| ATOM   | 956 | CG  | GLU | B | 51 | 74.336 | 42.091 | 4.007  | 1.00100.67       | C |
| ANISOU | 956 | CG  | GLU | B | 51 | 18674  | 8575   | 11001  | -2532 -2822 463  | C |
| ATOM   | 957 | CD  | GLU | B | 51 | 74.968 | 40.824 | 3.459  | 1.00 91.81       | C |
| ANISOU | 957 | CD  | GLU | B | 51 | 17695  | 7949   | 9240   | -2467 -2746 348  | C |
| ATOM   | 958 | OE1 | GLU | B | 51 | 74.234 | 39.989 | 2.884  | 1.00 88.35       | O |
| ANISOU | 958 | OE1 | GLU | B | 51 | 17403  | 8017   | 8148   | -2395 -2672 211  | O |
| ATOM   | 959 | OE2 | GLU | B | 51 | 76.194 | 40.648 | 3.636  | 1.00 87.34       | O |
| ANISOU | 959 | OE2 | GLU | B | 51 | 17105  | 7256   | 8822   | -2492 -2764 380  | O |
| ATOM   | 960 | C   | GLU | B | 51 | 74.164 | 44.737 | 1.142  | 1.00125.89       | C |
| ANISOU | 960 | C   | GLU | B | 51 | 20647  | 12311  | 14876  | -2200 -2486 2337 | C |
| ATOM   | 961 | O   | GLU | B | 51 | 74.294 | 44.367 | -0.014 | 1.00129.97       | O |
| ANISOU | 961 | O   | GLU | B | 51 | 21003  | 13391  | 14989  | -2066 -2345 2668 | O |
| ATOM   | 962 | N   | ARG | B | 52 | 73.412 | 45.786 | 1.475  | 1.00131.69       | N |
| ANISOU | 962 | N   | ARG | B | 52 | 21256  | 12702  | 16078  | -2237 -2532 2451 | N |
| ATOM   | 963 | CA  | ARG | B | 52 | 72.656 | 46.555 | 0.468  | 1.00137.87       | C |
| ANISOU | 963 | CA  | ARG | B | 52 | 21703  | 13772  | 16911  | -2118 -2413 2977 | C |
| ATOM   | 964 | CB  | ARG | B | 52 | 72.128 | 47.870 | 1.059  | 1.00141.01       | C |
| ANISOU | 964 | CB  | ARG | B | 52 | 21946  | 13633  | 17999  | -2186 -2488 3105 | C |
| ATOM   | 965 | CG  | ARG | B | 52 | 70.621 | 47.895 | 1.186  | 1.00142.72       | C |

|        |     |     |     |   |    |        |        |        |            |       |      |   |
|--------|-----|-----|-----|---|----|--------|--------|--------|------------|-------|------|---|
| ANISOU | 965 | CG  | ARG | B | 52 | 22305  | 13909  | 18015  | -2195      | -2504 | 2887 | C |
| ATOM   | 966 | CD  | ARG | B | 52 | 70.060 | 49.302 | 1.301  | 1.00155.13 |       |      | C |
| ANISOU | 966 | CD  | ARG | B | 52 | 23601  | 15121  | 20219  | -2208      | -2519 | 3219 | C |
| ATOM   | 967 | NE  | ARG | B | 52 | 68.600 | 49.275 | 1.186  | 1.00165.17 |       |      | N |
| ANISOU | 967 | NE  | ARG | B | 52 | 24973  | 16562  | 21222  | -2189      | -2505 | 3083 | N |
| ATOM   | 968 | CZ  | ARG | B | 52 | 67.926 | 49.502 | 0.056  | 1.00175.63 |       |      | C |
| ANISOU | 968 | CZ  | ARG | B | 52 | 26059  | 18357  | 22317  | -2055      | -2370 | 3499 | C |
| ATOM   | 969 | NH1 | ARG | B | 52 | 68.576 | 49.787 | -1.067 | 1.00180.32 |       |      | N |
| ANISOU | 969 | NH1 | ARG | B | 52 | 26294  | 19298  | 22920  | -1929      | -2237 | 4085 | N |
| ATOM   | 970 | NH2 | ARG | B | 52 | 66.598 | 49.441 | 0.046  | 1.00171.73 |       |      | N |
| ANISOU | 970 | NH2 | ARG | B | 52 | 25684  | 17987  | 21578  | -2049      | -2368 | 3330 | N |
| ATOM   | 971 | C   | ARG | B | 52 | 73.410 | 46.891 | -0.816 | 1.00143.34 |       |      | C |
| ANISOU | 971 | C   | ARG | B | 52 | 21985  | 14855  | 17621  | -1973      | -2261 | 3650 | C |
| ATOM   | 972 | O   | ARG | B | 52 | 74.548 | 47.363 | -0.788 | 1.00149.45 |       |      | O |
| ANISOU | 972 | O   | ARG | B | 52 | 22559  | 15410  | 18816  | -1980      | -2266 | 3923 | O |
| ATOM   | 973 | N   | GLY | B | 53 | 72.755 | 46.618 | -1.940 | 1.00145.93 |       |      | N |
| ANISOU | 973 | N   | GLY | B | 53 | 22198  | 15773  | 17476  | -1843      | -2125 | 3906 | N |
| ATOM   | 974 | CA  | GLY | B | 53 | 73.314 | 46.886 | -3.248 | 1.00153.03 |       |      | C |
| ANISOU | 974 | CA  | GLY | B | 53 | 22714  | 17106  | 18325  | -1697      | -1969 | 4544 | C |
| ATOM   | 975 | C   | GLY | B | 53 | 74.199 | 45.758 | -3.723 | 1.00154.70 |       |      | C |
| ANISOU | 975 | C   | GLY | B | 53 | 23031  | 17726  | 18021  | -1647      | -1906 | 4473 | C |
| ATOM   | 976 | O   | GLY | B | 53 | 74.727 | 45.800 | -4.837 | 1.00159.53 |       |      | O |
| ANISOU | 976 | O   | GLY | B | 53 | 23358  | 18749  | 18507  | -1525      | -1773 | 4963 | O |
| ATOM   | 977 | N   | ALA | B | 54 | 74.360 | 44.737 | -2.888 | 1.00142.03 |       |      | N |
| ANISOU | 977 | N   | ALA | B | 54 | 21837  | 16016  | 16110  | -1740      | -2000 | 3862 | N |
| ATOM   | 978 | CA  | ALA | B | 54 | 75.159 | 43.597 | -3.294 | 1.00135.30 |       |      | C |
| ANISOU | 978 | CA  | ALA | B | 54 | 21115  | 15554  | 14739  | -1697      | -1942 | 3753 | C |
| ATOM   | 979 | CB  | ALA | B | 54 | 75.772 | 42.893 | -2.107 | 1.00130.73 |       |      | C |
| ANISOU | 979 | CB  | ALA | B | 54 | 20905  | 14609  | 14159  | -1832      | -2080 | 3165 | C |
| ATOM   | 980 | C   | ALA | B | 54 | 74.248 | 42.668 | -4.056 | 1.00133.63 |       |      | C |
| ANISOU | 980 | C   | ALA | B | 54 | 21046  | 15965  | 13761  | -1611      | -1842 | 3639 | C |
| ATOM   | 981 | O   | ALA | B | 54 | 73.028 | 42.801 | -3.982 | 1.00137.87 |       |      | O |
| ANISOU | 981 | O   | ALA | B | 54 | 21665  | 16537  | 14181  | -1616      | -1852 | 3508 | O |
| ATOM   | 982 | N   | PRO | B | 55 | 74.841 | 41.732 | -4.804 | 1.00132.66 |       |      | N |
| ANISOU | 982 | N   | PRO | B | 55 | 20950  | 16338  | 13115  | -1531      | -1741 | 3696 | N |
| ATOM   | 983 | CA  | PRO | B | 55 | 74.095 | 40.733 | -5.573 | 1.00128.27 |       |      | C |
| ANISOU | 983 | CA  | PRO | B | 55 | 20541  | 16413  | 11782  | -1447      | -1637 | 3583 | C |
| ATOM   | 984 | CB  | PRO | B | 55 | 75.104 | 40.298 | -6.653 | 1.00123.04 |       |      | C |
| ANISOU | 984 | CB  | PRO | B | 55 | 19652  | 16223  | 10874  | -1318      | -1486 | 3947 | C |
| ATOM   | 985 | CG  | PRO | B | 55 | 76.032 | 41.432 | -6.781 | 1.00129.49 |       |      | C |
| ANISOU | 985 | CG  | PRO | B | 55 | 20115  | 16733  | 12350  | -1320      | -1496 | 4480 | C |
| ATOM   | 986 | CD  | PRO | B | 55 | 76.172 | 41.968 | -5.393 | 1.00133.22 |       |      | C |
| ANISOU | 986 | CD  | PRO | B | 55 | 20733  | 16485  | 13398  | -1469      | -1672 | 4147 | C |
| ATOM   | 987 | C   | PRO | B | 55 | 73.663 | 39.535 | -4.742 | 1.00119.73 |       |      | C |
| ANISOU | 987 | C   | PRO | B | 55 | 19891  | 15323  | 10277  | -1511      | -1700 | 2809 | C |
| ATOM   | 988 | O   | PRO | B | 55 | 74.479 | 39.004 | -3.997 | 1.00114.62 |       |      | O |
| ANISOU | 988 | O   | PRO | B | 55 | 19465  | 14432  | 9653   | -1597      | -1787 | 2468 | O |
| ATOM   | 989 | N   | GLY | B | 56 | 72.406 | 39.152 | -4.882 | 1.00117.16 |       |      | N |
| ANISOU | 989 | N   | GLY | B | 56 | 19512  | 15252  | 9752   | -1415      | -1602 | 2491 | N |
| ATOM   | 990 | CA  | GLY | B | 56 | 71.845 | 38.041 | -4.162 | 1.00114.30 |       |      | C |
| ANISOU | 990 | CA  | GLY | B | 56 | 19248  | 14889  | 9291   | -1390      | -1565 | 1720 | C |
| ATOM   | 991 | C   | GLY | B | 56 | 71.843 | 38.144 | -2.664 | 1.00101.24 |       |      | C |
| ANISOU | 991 | C   | GLY | B | 56 | 18016  | 12593  | 7860   | -1614      | -1786 | 1271 | C |
| ATOM   | 992 | O   | GLY | B | 56 | 72.077 | 37.169 | -1.991 | 1.00 99.06 |       |      | O |
| ANISOU | 992 | O   | GLY | B | 56 | 17736  | 12227  | 7674   | -1596      | -1733 | 743  | O |
| ATOM   | 993 | N   | ALA | B | 57 | 71.562 | 39.316 | -2.135 | 1.00100.02 |       |      | N |
| ANISOU | 993 | N   | ALA | B | 57 | 18151  | 11970  | 7883   | -1795      | -2019 | 1524 | N |
| ATOM   | 994 | CA  | ALA | B | 57 | 71.528 | 39.486 | -0.709 | 1.00 89.39 |       |      | C |
| ANISOU | 994 | CA  | ALA | B | 57 | 17143  | 9991   | 6832   | -1975      | -2228 | 1067 | C |
| ATOM   | 995 | CB  | ALA | B | 57 | 72.477 | 40.567 | -0.303 | 1.00100.50 |       |      | C |
| ANISOU | 995 | CB  | ALA | B | 57 | 18289  | 10879  | 9017   | -2024      | -2286 | 1368 | C |
| ATOM   | 996 | C   | ALA | B | 57 | 70.151 | 39.890 | -0.332 | 1.00 99.68 |       |      | C |
| ANISOU | 996 | C   | ALA | B | 57 | 18539  | 11147  | 8187   | -2013      | -2281 | 887  | C |

|        |      |     |     |   |    |        |        |        |            |       |      |   |
|--------|------|-----|-----|---|----|--------|--------|--------|------------|-------|------|---|
| ATOM   | 997  | O   | ALA | B | 57 | 69.475 | 40.509 | -1.115 | 1.00108.26 | O     |      |   |
| ANISOU | 997  | O   | ALA | B | 57 | 19367  | 12460  | 9306   | -1924      | -2189 | 1295 | O |
| ATOM   | 998  | N   | GLN | B | 58 | 69.752 | 39.538 | 0.882  | 1.00106.79 | N     |      |   |
| ANISOU | 998  | N   | GLN | B | 58 | 19640  | 11653  | 9281   | -2102      | -2348 | 277  | N |
| ATOM   | 999  | CA  | GLN | B | 58 | 68.433 | 39.868 | 1.387  | 1.00107.94 | C     |      |   |
| ANISOU | 999  | CA  | GLN | B | 58 | 19804  | 11615  | 9593   | -2117      | -2355 | 68   | C |
| ATOM   | 1000 | CB  | GLN | B | 58 | 67.672 | 38.595 | 1.694  | 1.00104.31 | C     |      |   |
| ANISOU | 1000 | CB  | GLN | B | 58 | 18884  | 11450  | 9298   | -1871      | -1997 | -297 | C |
| ATOM   | 1001 | CG  | GLN | B | 58 | 68.438 | 37.631 | 2.568  | 1.00       | 98.24 | C    |   |
| ANISOU | 1001 | CG  | GLN | B | 58 | 17854  | 10643  | 8829   | -1757      | -1847 | -528 | C |
| ATOM   | 1002 | CD  | GLN | B | 58 | 69.223 | 36.628 | 1.765  | 1.00       | 95.50 | C    |   |
| ANISOU | 1002 | CD  | GLN | B | 58 | 17286  | 10723  | 8277   | -1642      | -1702 | -514 | C |
| ATOM   | 1003 | OE1 | GLN | B | 58 | 68.827 | 36.242 | 0.677  | 1.00114.21 | O     |      |   |
| ANISOU | 1003 | OE1 | GLN | B | 58 | 19450  | 13575  | 10370  | -1524      | -1588 | -425 | O |
| ATOM   | 1004 | NE2 | GLN | B | 58 | 70.337 | 36.196 | 2.304  | 1.00       | 93.70 | N    |   |
| ANISOU | 1004 | NE2 | GLN | B | 58 | 17030  | 10365  | 8206   | -1641      | -1692 | -583 | N |
| ATOM   | 1005 | C   | GLN | B | 58 | 68.383 | 40.769 | 2.611  | 1.00101.61 | C     |      |   |
| ANISOU | 1005 | C   | GLN | B | 58 | 19225  | 10102  | 9281   | -2303      | -2599 | -116 | C |
| ATOM   | 1006 | O   | GLN | B | 58 | 67.310 | 41.193 | 3.009  | 1.00104.16 | O     |      |   |
| ANISOU | 1006 | O   | GLN | B | 58 | 19498  | 10284  | 9797   | -2290      | -2588 | -201 | O |
| ATOM   | 1007 | N   | LEU | B | 59 | 69.523 | 41.061 | 3.216  | 1.00       | 97.15 | N    |   |
| ANISOU | 1007 | N   | LEU | B | 59 | 18700  | 9108   | 9104   | -2409      | -2720 | -145 | N |
| ATOM   | 1008 | CA  | LEU | B | 59 | 69.523 | 41.915 | 4.384  | 1.00       | 98.32 | C    |   |
| ANISOU | 1008 | CA  | LEU | B | 59 | 18559  | 8821   | 9976   | -2370      | -2716 | -183 | C |
| ATOM   | 1009 | CB  | LEU | B | 59 | 70.769 | 41.654 | 5.221  | 1.00       | 95.76 | C    |   |
| ANISOU | 1009 | CB  | LEU | B | 59 | 17964  | 8479   | 9943   | -2260      | -2632 | -279 | C |
| ATOM   | 1010 | CG  | LEU | B | 59 | 70.874 | 40.354 | 5.993  | 1.00       | 75.38 | C    |   |
| ANISOU | 1010 | CG  | LEU | B | 59 | 15072  | 6332   | 7237   | -2006      | -2347 | -541 | C |
| ATOM   | 1011 | CD1 | LEU | B | 59 | 72.198 | 40.294 | 6.702  | 1.00       | 73.72 | C    |   |
| ANISOU | 1011 | CD1 | LEU | B | 59 | 14657  | 6039   | 7313   | -1966      | -2325 | -593 | C |
| ATOM   | 1012 | CD2 | LEU | B | 59 | 69.779 | 40.321 | 7.015  | 1.00       | 65.23 | C    |   |
| ANISOU | 1012 | CD2 | LEU | B | 59 | 13385  | 5210   | 6190   | -1829      | -2165 | -733 | C |
| ATOM   | 1013 | C   | LEU | B | 59 | 69.535 | 43.312 | 3.843  | 1.00       | 97.08 | C    |   |
| ANISOU | 1013 | C   | LEU | B | 59 | 18286  | 8258   | 10341  | -2495      | -2816 | 321  | C |
| ATOM   | 1014 | O   | LEU | B | 59 | 70.448 | 44.066 | 4.067  | 1.00103.10 | O     |      |   |
| ANISOU | 1014 | O   | LEU | B | 59 | 18835  | 8664   | 11673  | -2527      | -2844 | 585  | O |
| ATOM   | 1015 | N   | ILE | B | 60 | 68.499 | 43.656 | 3.108  | 1.00107.34 | N     |      |   |
| ANISOU | 1015 | N   | ILE | B | 60 | 19435  | 9861   | 11489  | -2405      | -2728 | 581  | N |
| ATOM   | 1016 | CA  | ILE | B | 60 | 68.422 | 44.965 | 2.496  | 1.00115.40 | C     |      |   |
| ANISOU | 1016 | CA  | ILE | B | 60 | 20013  | 10812  | 13020  | -2336      | -2657 | 1214 | C |
| ATOM   | 1017 | CB  | ILE | B | 60 | 67.992 | 44.851 | 1.039  | 1.00120.91 | C     |      |   |
| ANISOU | 1017 | CB  | ILE | B | 60 | 20471  | 12185  | 13285  | -2165      | -2479 | 1674 | C |
| ATOM   | 1018 | CG1 | ILE | B | 60 | 66.614 | 44.241 | 0.952  | 1.00102.32 | C     |      |   |
| ANISOU | 1018 | CG1 | ILE | B | 60 | 18361  | 10132  | 10384  | -2150      | -2468 | 1352 | C |
| ATOM   | 1019 | CD1 | ILE | B | 60 | 66.181 | 44.020 | -0.468 | 1.00103.52 | C     |      |   |
| ANISOU | 1019 | CD1 | ILE | B | 60 | 18306  | 10971  | 10055  | -1987      | -2293 | 1767 | C |
| ATOM   | 1020 | CG2 | ILE | B | 60 | 68.959 | 43.974 | 0.276  | 1.00106.92 | C     |      |   |
| ANISOU | 1020 | CG2 | ILE | B | 60 | 18676  | 10877  | 11073  | -2081      | -2382 | 1799 | C |
| ATOM   | 1021 | C   | ILE | B | 60 | 67.548 | 45.983 | 3.197  | 1.00114.10 | C     |      |   |
| ANISOU | 1021 | C   | ILE | B | 60 | 19817  | 10166  | 13370  | -2416      | -2745 | 1167 | C |
| ATOM   | 1022 | O   | ILE | B | 60 | 67.378 | 47.087 | 2.722  | 1.00117.84 | O     |      |   |
| ANISOU | 1022 | O   | ILE | B | 60 | 19935  | 10572  | 14266  | -2361      | -2689 | 1673 | O |
| ATOM   | 1023 | N   | THR | B | 61 | 66.989 | 45.617 | 4.326  | 1.00106.11 | N     |      |   |
| ANISOU | 1023 | N   | THR | B | 61 | 19130  | 8870   | 12317  | -2521      | -2865 | 558  | N |
| ATOM   | 1024 | CA  | THR | B | 61 | 66.162 | 46.572 | 5.074  | 1.00113.18 | C     |      |   |
| ANISOU | 1024 | CA  | THR | B | 61 | 19688  | 9652   | 13663  | -2434      | -2817 | 468  | C |
| ATOM   | 1025 | CB  | THR | B | 61 | 64.630 | 46.487 | 4.762  | 1.00       | 99.95 | C    |   |
| ANISOU | 1025 | CB  | THR | B | 61 | 18225  | 8095   | 11658  | -2458      | -2839 | 392  | C |
| ATOM   | 1026 | OG1 | THR | B | 61 | 64.014 | 45.497 | 5.584  | 1.00       | 97.81 | O    |   |
| ANISOU | 1026 | OG1 | THR | B | 61 | 17941  | 8249   | 10974  | -2293      | -2723 | -144 | O |
| ATOM   | 1027 | CG2 | THR | B | 61 | 64.375 | 46.166 | 3.325  | 1.00104.68 | C     |      |   |
| ANISOU | 1027 | CG2 | THR | B | 61 | 18867  | 9125   | 11783  | -2417      | -2764 | 802  | C |
| ATOM   | 1028 | C   | THR | B | 61 | 66.363 | 46.364 | 6.569  | 1.00116.73 | C     |      |   |

|        |      |     |     |   |    |        |        |        |            |       |      |   |
|--------|------|-----|-----|---|----|--------|--------|--------|------------|-------|------|---|
| ANISOU | 1028 | C   | THR | B | 61 | 19799  | 10275  | 14280  | -2251      | -2669 | -17  | C |
| ATOM   | 1029 | O   | THR | B | 61 | 66.785 | 45.295 | 7.011  | 1.00110.46 |       |      | O |
| ANISOU | 1029 | O   | THR | B | 61 | 19024  | 9784   | 13163  | -2154      | -2583 | -297 | O |
| ATOM   | 1030 | N   | TYR | B | 62 | 66.112 | 47.445 | 7.294  | 1.00136.90 |       |      | N |
| ANISOU | 1030 | N   | TYR | B | 62 | 19644  | 12950  | 19424  | -259       | -971  | -390 | N |
| ATOM   | 1031 | CA  | TYR | B | 62 | 66.287 | 47.542 | 8.732  | 1.00140.30 |       |      | C |
| ANISOU | 1031 | CA  | TYR | B | 62 | 19944  | 13504  | 19858  | -86        | -998  | -566 | C |
| ATOM   | 1032 | CB  | TYR | B | 62 | 66.182 | 49.025 | 9.107  | 1.00156.27 |       |      | C |
| ANISOU | 1032 | CB  | TYR | B | 62 | 22012  | 15355  | 22011  | -51        | -1155 | -679 | C |
| ATOM   | 1033 | CG  | TYR | B | 62 | 67.300 | 49.903 | 8.534  | 1.00175.70 |       |      | C |
| ANISOU | 1033 | CG  | TYR | B | 62 | 24543  | 17649  | 24567  | -249       | -1183 | -696 | C |
| ATOM   | 1034 | CD1 | TYR | B | 62 | 68.505 | 50.066 | 9.211  | 1.00183.57 |       |      | C |
| ANISOU | 1034 | CD1 | TYR | B | 62 | 25458  | 18699  | 25590  | -277       | -1160 | -825 | C |
| ATOM   | 1035 | CE1 | TYR | B | 62 | 69.512 | 50.860 | 8.698  | 1.00191.54 |       |      | C |
| ANISOU | 1035 | CE1 | TYR | B | 62 | 26531  | 19559  | 26686  | -456       | -1186 | -841 | C |
| ATOM   | 1036 | CZ  | TYR | B | 62 | 69.337 | 51.497 | 7.483  | 1.00196.61 |       |      | C |
| ANISOU | 1036 | CZ  | TYR | B | 62 | 27319  | 19994  | 27388  | -612       | -1234 | -725 | C |
| ATOM   | 1037 | OH  | TYR | B | 62 | 70.346 | 52.287 | 6.966  | 1.00202.71 |       |      | O |
| ANISOU | 1037 | OH  | TYR | B | 62 | 28155  | 20617  | 28248  | -792       | -1259 | -739 | O |
| ATOM   | 1038 | CE2 | TYR | B | 62 | 68.156 | 51.345 | 6.789  | 1.00191.96 |       |      | C |
| ANISOU | 1038 | CE2 | TYR | B | 62 | 26814  | 19349  | 26774  | -589       | -1257 | -596 | C |
| ATOM   | 1039 | CD2 | TYR | B | 62 | 67.148 | 50.552 | 7.314  | 1.00184.73 |       |      | C |
| ANISOU | 1039 | CD2 | TYR | B | 62 | 25834  | 18584  | 25772  | -409       | -1232 | -583 | C |
| ATOM   | 1040 | C   | TYR | B | 62 | 65.383 | 46.704 | 9.630  | 1.00126.56 |       |      | C |
| ANISOU | 1040 | C   | TYR | B | 62 | 18101  | 11958  | 18028  | 134        | -971  | -594 | C |
| ATOM   | 1041 | O   | TYR | B | 62 | 65.875 | 45.976 | 10.466 | 1.00126.82 |       |      | O |
| ANISOU | 1041 | O   | TYR | B | 62 | 18009  | 12177  | 17998  | 211        | -893  | -671 | O |
| ATOM   | 1042 | N   | PRO | B | 63 | 64.077 | 46.736 | 9.439  | 1.00116.43 |       |      | N |
| ANISOU | 1042 | N   | PRO | B | 63 | 16867  | 10639  | 16733  | 233        | -1027 | -528 | N |
| ATOM   | 1043 | CA  | PRO | B | 63 | 63.220 | 45.874 | 10.268 | 1.00112.89 |       |      | C |
| ANISOU | 1043 | CA  | PRO | B | 63 | 16319  | 10382  | 16194  | 440        | -993  | -548 | C |
| ATOM   | 1044 | CB  | PRO | B | 63 | 61.813 | 46.203 | 9.778  | 1.00116.31 |       |      | C |
| ANISOU | 1044 | CB  | PRO | B | 63 | 16844  | 10707  | 16640  | 503        | -1077 | -459 | C |
| ATOM   | 1045 | CG  | PRO | B | 63 | 61.996 | 46.570 | 8.365  | 1.00131.18 |       |      | C |
| ANISOU | 1045 | CG  | PRO | B | 63 | 18870  | 12405  | 18565  | 291        | -1081 | -324 | C |
| ATOM   | 1046 | CD  | PRO | B | 63 | 63.304 | 47.330 | 8.353  | 1.00126.20 |       |      | C |
| ANISOU | 1046 | CD  | PRO | B | 63 | 18250  | 11681  | 18018  | 152        | -1099 | -407 | C |
| ATOM   | 1047 | C   | PRO | B | 63 | 63.540 | 44.386 | 10.098 | 1.00108.85 |       |      | C |
| ANISOU | 1047 | C   | PRO | B | 63 | 15738  | 10063  | 15555  | 411        | -831  | -465 | C |
| ATOM   | 1048 | O   | PRO | B | 63 | 63.151 | 43.544 | 10.916 | 1.00 95.76 |       |      | O |
| ANISOU | 1048 | O   | PRO | B | 63 | 13972  | 8598   | 13815  | 571        | -779  | -502 | O |
| ATOM   | 1049 | N   | ARG | B | 64 | 64.249 | 44.087 | 9.014  | 1.00112.11 |       |      | N |
| ANISOU | 1049 | N   | ARG | B | 64 | 16218  | 10422  | 15955  | 204        | -753  | -352 | N |
| ATOM   | 1050 | CA  | ARG | B | 64 | 64.668 | 42.737 | 8.684  | 1.00102.56 |       |      | C |
| ANISOU | 1050 | CA  | ARG | B | 64 | 14961  | 9375   | 14633  | 142        | -598  | -262 | C |
| ATOM   | 1051 | CB  | ARG | B | 64 | 64.871 | 42.574 | 7.181  | 1.00101.64 |       |      | C |
| ANISOU | 1051 | CB  | ARG | B | 64 | 14967  | 9140   | 14512  | -73        | -549  | -90  | C |
| ATOM   | 1052 | CG  | ARG | B | 64 | 63.661 | 42.462 | 6.285  | 1.00 94.98 |       |      | C |
| ANISOU | 1052 | CG  | ARG | B | 64 | 14225  | 8213   | 13650  | -74        | -575  | 61   | C |
| ATOM   | 1053 | CD  | ARG | B | 64 | 64.212 | 42.271 | 4.885  | 1.00102.56 |       |      | C |
| ANISOU | 1053 | CD  | ARG | B | 64 | 15289  | 9073   | 14606  | -307       | -510  | 210  | C |
| ATOM   | 1054 | NE  | ARG | B | 64 | 63.254 | 41.764 | 3.913  | 1.00106.90 |       |      | N |
| ANISOU | 1054 | NE  | ARG | B | 64 | 15921  | 9589   | 15105  | -334       | -486  | 379  | N |
| ATOM   | 1055 | CZ  | ARG | B | 64 | 63.600 | 41.313 | 2.712  | 1.00103.16 |       |      | C |
| ANISOU | 1055 | CZ  | ARG | B | 64 | 15525  | 9070   | 14602  | -515       | -409  | 526  | C |
| ATOM   | 1056 | NH1 | ARG | B | 64 | 64.858 | 41.402 | 2.306  | 1.00 96.56 |       |      | N |
| ANISOU | 1056 | NH1 | ARG | B | 64 | 14701  | 8198   | 13788  | -689       | -358  | 524  | N |
| ATOM   | 1057 | NH2 | ARG | B | 64 | 62.693 | 40.751 | 1.927  | 1.00107.40 |       |      | N |
| ANISOU | 1057 | NH2 | ARG | B | 64 | 16123  | 9600   | 15085  | -521       | -381  | 674  | N |
| ATOM   | 1058 | C   | ARG | B | 64 | 65.973 | 42.390 | 9.360  | 1.00 96.57 |       |      | C |
| ANISOU | 1058 | C   | ARG | B | 64 | 14095  | 8744   | 13855  | 114        | -520  | -369 | C |
| ATOM   | 1059 | O   | ARG | B | 64 | 66.127 | 41.309 | 9.912  | 1.00 93.49 |       |      | O |
| ANISOU | 1059 | O   | ARG | B | 64 | 13597  | 8559   | 13367  | 191        | -418  | -383 | O |

|        |      |     |     |   |    |        |        |        |                 |   |
|--------|------|-----|-----|---|----|--------|--------|--------|-----------------|---|
| ATOM   | 1060 | N   | ALA | B | 65 | 66.929 | 43.306 | 9.285  | 1.00102.89      | N |
| ANISOU | 1060 | N   | ALA | B | 65 | 14927  | 9419   | 14747  | -3 -567 -440    | N |
| ATOM   | 1061 | CA  | ALA | B | 65 | 68.231 | 43.082 | 9.894  | 1.00103.22      | C |
| ANISOU | 1061 | CA  | ALA | B | 65 | 14874  | 9566   | 14780  | -42 -499 -546   | C |
| ATOM   | 1062 | CB  | ALA | B | 65 | 69.195 | 44.185 | 9.515  | 1.00107.10      | C |
| ANISOU | 1062 | CB  | ALA | B | 65 | 15433  | 9877   | 15382  | -203 -559 -592  | C |
| ATOM   | 1063 | C   | ALA | B | 65 | 68.114 | 42.974 | 11.411 | 1.00108.64      | C |
| ANISOU | 1063 | C   | ALA | B | 65 | 15420  | 10410  | 15448  | 174 -519 -711   | C |
| ATOM   | 1064 | O   | ALA | B | 65 | 68.981 | 42.396 | 12.071 | 1.00115.57      | O |
| ANISOU | 1064 | O   | ALA | B | 65 | 16190  | 11442  | 16280  | 190 -436 -789   | O |
| ATOM   | 1065 | N   | LEU | B | 66 | 67.031 | 43.520 | 11.959 | 1.00104.81      | N |
| ANISOU | 1065 | N   | LEU | B | 66 | 14937  | 9889   | 14998  | 342 -628 -761   | N |
| ATOM   | 1066 | CA  | LEU | B | 66 | 66.794 | 43.490 | 13.396 | 1.00 99.94      | C |
| ANISOU | 1066 | CA  | LEU | B | 66 | 14193  | 9412   | 14369  | 559 -659 -915   | C |
| ATOM   | 1067 | CB  | LEU | B | 66 | 65.770 | 44.559 | 13.789 | 1.00 97.91      | C |
| ANISOU | 1067 | CB  | LEU | B | 66 | 13976  | 9032   | 14193  | 692 -815 -976   | C |
| ATOM   | 1068 | CG  | LEU | B | 66 | 65.321 | 44.651 | 15.244 | 1.00 96.93      | C |
| ANISOU | 1068 | CG  | LEU | B | 66 | 13734  | 9030   | 14065  | 931 -868 -1131  | C |
| ATOM   | 1069 | CD1 | LEU | B | 66 | 65.310 | 46.108 | 15.669 | 1.00 98.16      | C |
| ANISOU | 1069 | CD1 | LEU | B | 66 | 13925  | 9023   | 14348  | 967 -1020 -1253 | C |
| ATOM   | 1070 | CD2 | LEU | B | 66 | 63.952 | 44.009 | 15.454 | 1.00 90.79      | C |
| ANISOU | 1070 | CD2 | LEU | B | 66 | 12935  | 8349   | 13213  | 1100 -867 -1071 | C |
| ATOM   | 1071 | C   | LEU | B | 66 | 66.326 | 42.095 | 13.792 | 1.00 97.60      | C |
| ANISOU | 1071 | C   | LEU | B | 66 | 13800  | 9342   | 13941  | 679 -549 -873   | C |
| ATOM   | 1072 | O   | LEU | B | 66 | 66.684 | 41.578 | 14.858 | 1.00100.20      | O |
| ANISOU | 1072 | O   | LEU | B | 66 | 13999  | 9850   | 14223  | 798 -500 -982   | O |
| ATOM   | 1073 | N   | TRP | B | 67 | 65.508 | 41.501 | 12.931 | 1.00 92.48      | N |
| ANISOU | 1073 | N   | TRP | B | 67 | 13218  | 8686   | 13235  | 651 -512 -714   | N |
| ATOM   | 1074 | CA  | TRP | B | 67 | 65.011 | 40.153 | 13.150 | 1.00 91.95      | C |
| ANISOU | 1074 | CA  | TRP | B | 67 | 13073  | 8821   | 13042  | 749 -405 -653   | C |
| ATOM   | 1075 | CB  | TRP | B | 67 | 63.889 | 39.832 | 12.161 | 1.00 92.30      | C |
| ANISOU | 1075 | CB  | TRP | B | 67 | 13215  | 8802   | 13051  | 728 -406 -483   | C |
| ATOM   | 1076 | CG  | TRP | B | 67 | 63.465 | 38.397 | 12.119 | 1.00 85.21      | C |
| ANISOU | 1076 | CG  | TRP | B | 67 | 12257  | 8096   | 12023  | 786 -285 -390   | C |
| ATOM   | 1077 | CD1 | TRP | B | 67 | 63.331 | 37.615 | 11.009 | 1.00 85.74      | C |
| ANISOU | 1077 | CD1 | TRP | B | 67 | 12388  | 8163   | 12025  | 663 -198 -220   | C |
| ATOM   | 1078 | NE1 | TRP | B | 67 | 62.905 | 36.358 | 11.364 | 1.00 91.24      | N |
| ANISOU | 1078 | NE1 | TRP | B | 67 | 12998  | 9062   | 12606  | 771 -101 -181   | N |
| ATOM   | 1079 | CE2 | TRP | B | 67 | 62.751 | 36.309 | 12.726 | 1.00 88.32      | C |
| ANISOU | 1079 | CE2 | TRP | B | 67 | 12506  | 8829   | 12224  | 968 -123 -326   | C |
| ATOM   | 1080 | CD2 | TRP | B | 67 | 63.093 | 37.579 | 13.234 | 1.00 86.57      | C |
| ANISOU | 1080 | CD2 | TRP | B | 67 | 12295  | 8484   | 12114  | 983 -239 -461   | C |
| ATOM   | 1081 | CE3 | TRP | B | 67 | 63.019 | 37.795 | 14.614 | 1.00 92.47      | C |
| ANISOU | 1081 | CE3 | TRP | B | 67 | 12929  | 9334   | 12872  | 1173 -284 -625  | C |
| ATOM   | 1082 | CZ3 | TRP | B | 67 | 62.618 | 36.751 | 15.432 | 1.00 96.20      | C |
| ANISOU | 1082 | CZ3 | TRP | B | 67 | 13281  | 10025  | 13244  | 1338 -213 -649  | C |
| ATOM   | 1083 | CH2 | TRP | B | 67 | 62.286 | 35.496 | 14.899 | 1.00 93.89      | C |
| ANISOU | 1083 | CH2 | TRP | B | 67 | 12981  | 9851   | 12842  | 1317 -97 -512   | C |
| ATOM   | 1084 | CZ2 | TRP | B | 67 | 62.346 | 35.254 | 13.553 | 1.00 88.50      | C |
| ANISOU | 1084 | CZ2 | TRP | B | 67 | 12408  | 9073   | 12146  | 1134 -51 -351   | C |
| ATOM   | 1085 | C   | TRP | B | 67 | 66.170 | 39.174 | 13.006 | 1.00 86.63      | C |
| ANISOU | 1085 | C   | TRP | B | 67 | 12339  | 8283   | 12294  | 636 -258 -630   | C |
| ATOM   | 1086 | O   | TRP | B | 67 | 66.302 | 38.212 | 13.765 | 1.00 83.35      | O |
| ANISOU | 1086 | O   | TRP | B | 67 | 11803  | 8075   | 11790  | 741 -171 -673   | O |
| ATOM   | 1087 | N   | TRP | B | 68 | 66.989 | 39.422 | 11.989 | 1.00 91.57      | N |
| ANISOU | 1087 | N   | TRP | B | 68 | 13052  | 8786   | 12955  | 418 -231 -557   | N |
| ATOM   | 1088 | CA  | TRP | B | 68 | 68.136 | 38.572 | 11.679 | 1.00 88.70      | C |
| ANISOU | 1088 | CA  | TRP | B | 68 | 12649  | 8525   | 12527  | 282 -95 -522    | C |
| ATOM   | 1089 | CB  | TRP | B | 68 | 68.907 | 39.129 | 10.474 | 1.00 89.69      | C |
| ANISOU | 1089 | CB  | TRP | B | 68 | 12894  | 8467   | 12715  | 38 -97 -441     | C |
| ATOM   | 1090 | CG  | TRP | B | 68 | 70.206 | 38.415 | 10.218 | 1.00 87.83      | C |
| ANISOU | 1090 | CG  | TRP | B | 68 | 12619  | 8324   | 12429  | -107 31 -424    | C |
| ATOM   | 1091 | CD1 | TRP | B | 68 | 70.362 | 37.167 | 9.689  | 1.00 82.98      | C |

|        |      |     |     |   |    |        |        |        |      |       |       |   |
|--------|------|-----|-----|---|----|--------|--------|--------|------|-------|-------|---|
| ANISOU | 1091 | CD1 | TRP | B | 68 | 11986  | 7836   | 11706  | -171 | 165   | -307  | C |
| ATOM   | 1092 | NE1 | TRP | B | 68 | 71.699 | 36.845 | 9.620  | 1.00 | 80.76 |       | N |
| ANISOU | 1092 | NE1 | TRP | B | 68 | 11668  | 7611   | 11408  | -301 | 254   | -333  | N |
| ATOM   | 1093 | CE2 | TRP | B | 68 | 72.432 | 37.887 | 10.109 | 1.00 | 85.22 |       | C |
| ANISOU | 1093 | CE2 | TRP | B | 68 | 12224  | 8085   | 12070  | -323 | 178   | -468  | C |
| ATOM   | 1094 | CD2 | TRP | B | 68 | 71.530 | 38.898 | 10.505 | 1.00 | 89.43 |       | C |
| ANISOU | 1094 | CD2 | TRP | B | 68 | 12791  | 8502   | 12685  | -202 | 37    | -530  | C |
| ATOM   | 1095 | CE3 | TRP | B | 68 | 72.031 | 40.083 | 11.046 | 1.00 | 84.72 |       | C |
| ANISOU | 1095 | CE3 | TRP | B | 68 | 12194  | 7798   | 12198  | -198 | -64   | -670  | C |
| ATOM   | 1096 | CZ3 | TRP | B | 68 | 73.394 | 40.229 | 11.170 | 1.00 | 92.13 |       | C |
| ANISOU | 1096 | CZ3 | TRP | B | 68 | 13099  | 8744   | 13162  | -313 | -22   | -742  | C |
| ATOM   | 1097 | CH2 | TRP | B | 68 | 74.275 | 39.210 | 10.772 | 1.00 | 91.45 |       | C |
| ANISOU | 1097 | CH2 | TRP | B | 68 | 12979  | 8775   | 12991  | -432 | 120   | -679  | C |
| ATOM   | 1098 | CZ2 | TRP | B | 68 | 73.816 | 38.036 | 10.245 | 1.00 | 88.08 |       | C |
| ANISOU | 1098 | CZ2 | TRP | B | 68 | 12552  | 8458   | 12456  | -439 | 221   | -543  | C |
| ATOM   | 1099 | C   | TRP | B | 68 | 69.073 | 38.416 | 12.871 | 1.00 | 80.53 |       | C |
| ANISOU | 1099 | C   | TRP | B | 68 | 11478  | 7637   | 11482  | 355  | -58   | -686  | C |
| ATOM   | 1100 | O   | TRP | B | 68 | 69.516 | 37.314 | 13.179 | 1.00 | 79.15 |       | O |
| ANISOU | 1100 | O   | TRP | B | 68 | 11212  | 7650   | 11211  | 373  | 63    | -683  | O |
| ATOM   | 1101 | N   | SER | B | 69 | 69.356 | 39.530 | 13.537 | 1.00 | 83.94 |       | N |
| ANISOU | 1101 | N   | SER | B | 69 | 11899  | 7980   | 12013  | 400  | -164  | -829  | N |
| ATOM   | 1102 | CA  | SER | B | 69 | 70.277 | 39.547 | 14.675 | 1.00 | 93.56 |       | C |
| ANISOU | 1102 | CA  | SER | B | 69 | 12997  | 9316   | 13237  | 466  | -143  | -995  | C |
| ATOM   | 1103 | CB  | SER | B | 69 | 70.553 | 40.990 | 15.101 | 1.00 | 91.27 |       | C |
| ANISOU | 1103 | CB  | SER | B | 69 | 12733  | 8867   | 13077  | 474  | -279  | -1127 | C |
| ATOM   | 1104 | OG  | SER | B | 69 | 69.393 | 41.795 | 14.957 | 1.00 | 95.56 |       | O |
| ANISOU | 1104 | OG  | SER | B | 69 | 13354  | 9271   | 13682  | 551  | -406  | -1106 | O |
| ATOM   | 1105 | C   | SER | B | 69 | 69.786 | 38.729 | 15.877 | 1.00 | 85.82 |       | C |
| ANISOU | 1105 | C   | SER | B | 69 | 11877  | 8559   | 12173  | 689  | -103  | -1073 | C |
| ATOM   | 1106 | O   | SER | B | 69 | 70.564 | 37.994 | 16.499 | 1.00 | 76.54 |       | O |
| ANISOU | 1106 | O   | SER | B | 69 | 10592  | 7555   | 10936  | 712  | -7    | -1138 | O |
| ATOM   | 1107 | N   | VAL | B | 70 | 68.500 | 38.862 | 16.187 | 1.00 | 76.20 |       | N |
| ANISOU | 1107 | N   | VAL | B | 70 | 10663  | 7336   | 10952  | 850  | -176  | -1066 | N |
| ATOM   | 1108 | CA  | VAL | B | 70 | 68.000 | 38.114 | 17.334 | 1.00 | 76.15 |       | C |
| ANISOU | 1108 | CA  | VAL | B | 70 | 10525  | 7538   | 10868  | 1066 | -142  | -1141 | C |
| ATOM   | 1109 | CB  | VAL | B | 70 | 66.554 | 38.515 | 17.681 | 1.00 | 75.87 |       | C |
| ANISOU | 1109 | CB  | VAL | B | 70 | 10509  | 7466   | 10854  | 1244 | -249  | -1145 | C |
| ATOM   | 1110 | CG1 | VAL | B | 70 | 66.014 | 37.637 | 18.799 | 1.00 | 79.54 |       | C |
| ANISOU | 1110 | CG1 | VAL | B | 70 | 10839  | 8155   | 11230  | 1461 | -204  | -1207 | C |
| ATOM   | 1111 | CG2 | VAL | B | 70 | 66.490 | 39.984 | 18.069 | 1.00 | 85.08 |       | C |
| ANISOU | 1111 | CG2 | VAL | B | 70 | 11714  | 8464   | 12148  | 1280 | -403  | -1261 | C |
| ATOM   | 1112 | C   | VAL | B | 70 | 68.056 | 36.605 | 17.103 | 1.00 | 79.04 |       | C |
| ANISOU | 1112 | C   | VAL | B | 70 | 10836  | 8093   | 11101  | 1053 | 11    | -1040 | C |
| ATOM   | 1113 | O   | VAL | B | 70 | 68.412 | 35.847 | 18.005 | 1.00 | 83.56 |       | O |
| ANISOU | 1113 | O   | VAL | B | 70 | 11282  | 8862   | 11605  | 1155 | 87    | -1119 | O |
| ATOM   | 1114 | N   | GLU | B | 71 | 67.650 | 36.195 | 15.854 | 1.00 | 83.00 |       | N |
| ANISOU | 1114 | N   | GLU | B | 71 | 11440  | 8528   | 11570  | 929  | 52    | -861  | N |
| ATOM   | 1115 | CA  | GLU | B | 71 | 67.649 | 34.774 | 15.539 | 1.00 | 80.58 |       | C |
| ANISOU | 1115 | CA  | GLU | B | 71 | 11092  | 8388   | 11138  | 909  | 194   | -754  | C |
| ATOM   | 1116 | CB  | GLU | B | 71 | 66.727 | 34.477 | 14.349 | 1.00 | 81.23 |       | C |
| ANISOU | 1116 | CB  | GLU | B | 71 | 11286  | 8387   | 11192  | 840  | 200   | -568  | C |
| ATOM   | 1117 | CG  | GLU | B | 71 | 67.257 | 34.858 | 12.985 | 1.00 | 79.25 |       | C |
| ANISOU | 1117 | CG  | GLU | B | 71 | 11167  | 7959   | 10986  | 601  | 206   | -452  | C |
| ATOM   | 1118 | CD  | GLU | B | 71 | 66.383 | 34.309 | 11.860 | 1.00 | 79.47 |       | C |
| ANISOU | 1118 | CD  | GLU | B | 71 | 11286  | 7944   | 10963  | 542  | 237   | -264  | C |
| ATOM   | 1119 | OE1 | GLU | B | 71 | 66.548 | 33.131 | 11.466 | 1.00 | 73.72 |       | O |
| ANISOU | 1119 | OE1 | GLU | B | 71 | 10532  | 7344   | 10134  | 493  | 362   | -166  | O |
| ATOM   | 1120 | OE2 | GLU | B | 71 | 65.531 | 35.072 | 11.360 | 1.00 | 82.34 |       | O |
| ANISOU | 1120 | OE2 | GLU | B | 71 | 11752  | 8145   | 11390  | 543  | 135   | -213  | O |
| ATOM   | 1121 | C   | GLU | B | 71 | 69.059 | 34.287 | 15.273 | 1.00 | 79.72 |       | C |
| ANISOU | 1121 | C   | GLU | B | 71 | 10953  | 8338   | 10997  | 748  | 305   | -753  | C |
| ATOM   | 1122 | O   | GLU | B | 71 | 69.288 | 33.089 | 15.112 | 1.00 | 83.27 |       | O |
| ANISOU | 1122 | O   | GLU | B | 71 | 11354  | 8942   | 11343  | 724  | 432   | -684  | O |

|        |      |     |     |   |    |        |        |        |       |       |       |   |
|--------|------|-----|-----|---|----|--------|--------|--------|-------|-------|-------|---|
| ATOM   | 1123 | N   | THR | B | 72 | 70.003 | 35.221 | 15.215 | 1.00  | 80.46 | N     |   |
| ANISOU | 1123 | N   | THR | B | 72 | 11080  | 8308   | 11183  | 636   | 256   | -830  | N |
| ATOM   | 1124 | CA  | THR | B | 72 | 71.405 | 34.866 | 15.036 | 1.00  | 84.55 | C     |   |
| ANISOU | 1124 | CA  | THR | B | 72 | 11568  | 8876   | 11681  | 485   | 353   | -846  | C |
| ATOM   | 1125 | CB  | THR | B | 72 | 72.125 | 35.840 | 14.068 | 1.00  | 82.74 | C     |   |
| ANISOU | 1125 | CB  | THR | B | 72 | 11459  | 8427   | 11550  | 271   | 304   | -811  | C |
| ATOM   | 1126 | OG1 | THR | B | 72 | 71.547 | 35.739 | 12.758 | 1.00  | 89.98 | O     |   |
| ANISOU | 1126 | OG1 | THR | B | 72 | 12502  | 9228   | 12460  | 151   | 308   | -633  | O |
| ATOM   | 1127 | CG2 | THR | B | 72 | 73.621 | 35.533 | 14.001 | 1.00  | 81.89 | C     |   |
| ANISOU | 1127 | CG2 | THR | B | 72 | 11311  | 8376   | 11426  | 126   | 399   | -846  | C |
| ATOM   | 1128 | C   | THR | B | 72 | 72.124 | 34.842 | 16.392 | 1.00  | 81.30 | C     |   |
| ANISOU | 1128 | C   | THR | B | 72 | 11017  | 8606   | 11267  | 602   | 368   | -1029 | C |
| ATOM   | 1129 | O   | THR | B | 72 | 72.932 | 33.946 | 16.662 | 1.00  | 75.10 | O     |   |
| ANISOU | 1129 | O   | THR | B | 72 | 10148  | 7981   | 10405  | 577   | 485   | -1047 | O |
| ATOM   | 1130 | N   | ALA | B | 73 | 71.842 | 35.841 | 17.228 | 1.00  | 78.80 | N     |   |
| ANISOU | 1130 | N   | ALA | B | 73 | 10680  | 8227   | 11035  | 726   | 247   | -1164 | N |
| ATOM   | 1131 | CA  | ALA | B | 73 | 72.442 | 35.942 | 18.565 | 1.00  | 84.14 | C     |   |
| ANISOU | 1131 | CA  | ALA | B | 73 | 11227  | 9023   | 11719  | 850   | 244   | -1346 | C |
| ATOM   | 1132 | CB  | ALA | B | 73 | 72.111 | 37.294 | 19.193 | 1.00  | 81.22 | C     |   |
| ANISOU | 1132 | CB  | ALA | B | 73 | 10873  | 8521   | 11466  | 946   | 88    | -1473 | C |
| ATOM   | 1133 | C   | ALA | B | 73 | 71.996 | 34.821 | 19.495 | 1.00  | 83.34 | C     |   |
| ANISOU | 1133 | C   | ALA | B | 73 | 10995  | 9162   | 11508  | 1038  | 320   | -1380 | C |
| ATOM   | 1134 | O   | ALA | B | 73 | 72.746 | 34.381 | 20.367 | 1.00  | 86.54 | O     |   |
| ANISOU | 1134 | O   | ALA | B | 73 | 11285  | 9721   | 11876  | 1094  | 384   | -1488 | O |
| ATOM   | 1135 | N   | THR | B | 74 | 70.769 | 34.389 | 19.360 | 1.00  | 74.34 | N     |   |
| ANISOU | 1135 | N   | THR | B | 74 | 9320   | 9813   | 9115   | -1298 | 334   | 1586  | N |
| ATOM   | 1136 | CA  | THR | B | 74 | 70.229 | 33.293 | 20.163 | 1.00  | 77.22 | C     |   |
| ANISOU | 1136 | CA  | THR | B | 74 | 9381   | 10305  | 9655   | -1088 | 483   | 1610  | C |
| ATOM   | 1137 | CB  | THR | B | 74 | 68.683 | 33.300 | 20.166 | 1.00  | 81.45 | C     |   |
| ANISOU | 1137 | CB  | THR | B | 74 | 9982   | 10780  | 10184  | -790  | 481   | 1493  | C |
| ATOM   | 1138 | OG1 | THR | B | 74 | 68.208 | 33.286 | 18.810 | 1.00  | 78.40 | O     |   |
| ANISOU | 1138 | OG1 | THR | B | 74 | 9643   | 10317  | 9828   | -802  | 514   | 1408  | O |
| ATOM   | 1139 | CG2 | THR | B | 74 | 68.146 | 34.535 | 20.891 | 1.00  | 86.85 | C     |   |
| ANISOU | 1139 | CG2 | THR | B | 74 | 11021  | 11347  | 10632  | -681  | 278   | 1439  | C |
| ATOM   | 1140 | C   | THR | B | 74 | 70.691 | 31.944 | 19.592 | 1.00  | 76.60 | C     |   |
| ANISOU | 1140 | C   | THR | B | 74 | 8917   | 10360  | 9829   | -1166 | 701   | 1667  | C |
| ATOM   | 1141 | O   | THR | B | 74 | 70.459 | 30.901 | 20.192 | 1.00  | 74.45 | O     |   |
| ANISOU | 1141 | O   | THR | B | 74 | 8347   | 10212  | 9728   | -1034 | 844   | 1705  | O |
| ATOM   | 1142 | N   | THR | B | 75 | 71.343 | 32.008 | 18.432 | 1.00  | 76.14 | N     |   |
| ANISOU | 1142 | N   | THR | B | 75 | 8875   | 10270  | 9785   | -1381 | 718   | 1672  | N |
| ATOM   | 1143 | CA  | THR | B | 75 | 71.844 | 30.853 | 17.671 | 1.00  | 72.16 | C     |   |
| ANISOU | 1143 | CA  | THR | B | 75 | 8043   | 9872   | 9501   | -1486 | 910   | 1719  | C |
| ATOM   | 1144 | CB  | THR | B | 75 | 72.828 | 29.936 | 18.488 | 1.00  | 76.69 | C     |   |
| ANISOU | 1144 | CB  | THR | B | 75 | 8300   | 10615  | 10223  | -1576 | 1032  | 1854  | C |
| ATOM   | 1145 | OG1 | THR | B | 75 | 72.131 | 29.220 | 19.519 | 1.00  | 87.47 | O     |   |
| ANISOU | 1145 | OG1 | THR | B | 75 | 9470   | 12072  | 11694  | -1337 | 1115  | 1861  | O |
| ATOM   | 1146 | CG2 | THR | B | 75 | 73.937 | 30.784 | 19.126 | 1.00  | 85.55 | C     |   |
| ANISOU | 1146 | CG2 | THR | B | 75 | 9598   | 11722  | 11185  | -1777 | 891   | 1937  | C |
| ATOM   | 1147 | C   | THR | B | 75 | 70.727 | 29.986 | 17.066 | 1.00  | 75.94 | C     |   |
| ANISOU | 1147 | C   | THR | B | 75 | 8341   | 10369  | 10143  | -1282 | 1053  | 1640  | C |
| ATOM   | 1148 | O   | THR | B | 75 | 70.951 | 28.824 | 16.732 | 1.00  | 80.40 | O     |   |
| ANISOU | 1148 | O   | THR | B | 75 | 8580   | 11048  | 10920  | -1302 | 1235  | 1682  | O |
| ATOM   | 1149 | N   | VAL | B | 76 | 69.535 | 30.556 | 16.890 | 1.00  | 77.92 | N     |   |
| ANISOU | 1149 | N   | VAL | B | 76 | 8806   | 10506  | 10295  | -1091 | 969   | 1526  | N |
| ATOM   | 1150 | CA  | VAL | B | 76 | 68.427 | 29.796 | 16.299 | 1.00  | 76.35 | C     |   |
| ANISOU | 1150 | CA  | VAL | B | 76 | 8456   | 10314  | 10238  | -893  | 1095  | 1447  | C |
| ATOM   | 1151 | CB  | VAL | B | 76 | 67.076 | 30.522 | 16.502 | 1.00  | 68.93 | C     |   |
| ANISOU | 1151 | CB  | VAL | B | 76 | 7772   | 9256   | 9163   | -650  | 980   | 1332  | C |
| ATOM   | 1152 | CG1 | VAL | B | 76 | 65.950 | 29.789 | 15.747 | 1.00  | 64.43 | C     |   |
| ANISOU | 1152 | CG1 | VAL | B | 76 | 7064   | 8683   | 8734   | -463  | 1105  | 1248  | C |
| ATOM   | 1153 | CG2 | VAL | B | 76 | 66.743 | 30.557 | 17.990 | 1.00  | 81.17 | C     |   |
| ANISOU | 1153 | CG2 | VAL | B | 76 | 9311   | 10857  | 10674  | -474  | 940   | 1361  | C |
| ATOM   | 1154 | C   | VAL | B | 76 | 68.693 | 29.574 | 14.805 | 1.00  | 77.54 | C     |   |



|        |      |     |     |   |    |        |        |        |       |       |      |   |
|--------|------|-----|-----|---|----|--------|--------|--------|-------|-------|------|---|
| ANISOU | 1154 | C   | VAL | B | 76 | 8569   | 10432  | 10460  | -1048 | 1163  | 1419 | C |
| ATOM   | 1155 | O   | VAL | B | 76 | 68.657 | 28.439 | 14.324 | 1.00  | 82.20 |      | O |
| ANISOU | 1155 | O   | VAL | B | 76 | 8858   | 11116  | 11260  | -1030 | 1342  | 1436 | O |
| ATOM   | 1156 | N   | GLY | B | 77 | 68.977 | 30.659 | 14.081 | 1.00  | 84.83 |      | N |
| ANISOU | 1156 | N   | GLY | B | 77 | 9799   | 11224  | 11209  | -1203 | 1017  | 1378 | N |
| ATOM   | 1157 | CA  | GLY | B | 77 | 69.297 | 30.565 | 12.663 | 1.00  | 78.17 |      | C |
| ANISOU | 1157 | CA  | GLY | B | 77 | 8947   | 10341  | 10412  | -1368 | 1063  | 1353 | C |
| ATOM   | 1158 | C   | GLY | B | 77 | 68.347 | 29.829 | 11.728 | 1.00  | 66.66 |      | C |
| ANISOU | 1158 | C   | GLY | B | 77 | 7348   | 8877   | 9101   | -1228 | 1194  | 1273 | C |
| ATOM   | 1159 | O   | GLY | B | 77 | 68.737 | 28.848 | 11.073 | 1.00  | 66.63 |      | O |
| ANISOU | 1159 | O   | GLY | B | 77 | 7072   | 8960   | 9283   | -1310 | 1356  | 1309 | O |
| ATOM   | 1160 | N   | TYR | B | 78 | 67.112 | 30.322 | 11.630 | 1.00  | 71.05 |      | N |
| ANISOU | 1160 | N   | TYR | B | 78 | 8097   | 9328   | 9571   | -1023 | 1122  | 1163 | N |
| ATOM   | 1161 | CA  | TYR | B | 78 | 66.104 | 29.714 | 10.767 | 1.00  | 69.86 |      | C |
| ANISOU | 1161 | CA  | TYR | B | 78 | 7843   | 9159   | 9544   | -874  | 1231  | 1080 | C |
| ATOM   | 1162 | CB  | TYR | B | 78 | 64.822 | 30.551 | 10.763 | 1.00  | 60.25 |      | C |
| ANISOU | 1162 | CB  | TYR | B | 78 | 6913   | 7803   | 8177   | -668  | 1106  | 961  | C |
| ATOM   | 1163 | CG  | TYR | B | 78 | 64.088 | 30.584 | 12.084 | 1.00  | 65.87 |      | C |
| ANISOU | 1163 | CG  | TYR | B | 78 | 7634   | 8541   | 8851   | -428  | 1070  | 957  | C |
| ATOM   | 1164 | CD1 | TYR | B | 78 | 63.620 | 29.408 | 12.674 | 1.00  | 63.78 |      | C |
| ANISOU | 1164 | CD1 | TYR | B | 78 | 7051   | 8405   | 8778   | -243  | 1230  | 986  | C |
| ATOM   | 1165 | CE1 | TYR | B | 78 | 62.877 | 29.443 | 13.864 | 1.00  | 59.09 |      | C |
| ANISOU | 1165 | CE1 | TYR | B | 78 | 6470   | 7834   | 8149   | -11   | 1196  | 976  | C |
| ATOM   | 1166 | CZ  | TYR | B | 78 | 62.611 | 30.669 | 14.461 | 1.00  | 65.56 |      | C |
| ANISOU | 1166 | CZ  | TYR | B | 78 | 7626   | 8544   | 8739   | 36    | 1001  | 937  | C |
| ATOM   | 1167 | OH  | TYR | B | 78 | 61.856 | 30.742 | 15.602 | 1.00  | 69.38 |      | O |
| ANISOU | 1167 | OH  | TYR | B | 78 | 8134   | 9044   | 9181   | 267   | 963   | 924  | O |
| ATOM   | 1168 | CE2 | TYR | B | 78 | 63.077 | 31.846 | 13.894 | 1.00  | 68.01 |      | C |
| ANISOU | 1168 | CE2 | TYR | B | 78 | 8257   | 8726   | 8858   | -146  | 840   | 908  | C |
| ATOM   | 1169 | CD2 | TYR | B | 78 | 63.810 | 31.798 | 12.713 | 1.00  | 71.37 |      | C |
| ANISOU | 1169 | CD2 | TYR | B | 78 | 8665   | 9132   | 9321   | -376  | 875   | 918  | C |
| ATOM   | 1170 | C   | TYR | B | 78 | 66.560 | 29.550 | 9.324  | 1.00  | 66.20 |      | C |
| ANISOU | 1170 | C   | TYR | B | 78 | 7348   | 8666   | 9141   | -1065 | 1289  | 1065 | C |
| ATOM   | 1171 | O   | TYR | B | 78 | 66.273 | 28.547 | 8.695  | 1.00  | 60.69 |      | O |
| ANISOU | 1171 | O   | TYR | B | 78 | 6401   | 8028   | 8630   | -1016 | 1453  | 1055 | O |
| ATOM   | 1172 | N   | GLY | B | 79 | 67.236 | 30.552 | 8.799  | 1.00  | 67.92 |      | N |
| ANISOU | 1172 | N   | GLY | B | 79 | 7822   | 8788   | 9196   | -1276 | 1152  | 1061 | N |
| ATOM   | 1173 | CA  | GLY | B | 79 | 67.648 | 30.540 | 7.415  | 1.00  | 61.31 |      | C |
| ANISOU | 1173 | CA  | GLY | B | 79 | 6994   | 7908   | 8391   | -1460 | 1186  | 1041 | C |
| ATOM   | 1174 | C   | GLY | B | 79 | 66.851 | 31.416 | 6.471  | 1.00  | 61.07 |      | C |
| ANISOU | 1174 | C   | GLY | B | 79 | 7260   | 7715   | 8230   | -1424 | 1076  | 920  | C |
| ATOM   | 1175 | O   | GLY | B | 79 | 67.058 | 31.370 | 5.279  | 1.00  | 55.58 |      | O |
| ANISOU | 1175 | O   | GLY | B | 79 | 6568   | 6981   | 7569   | -1554 | 1110  | 893  | O |
| ATOM   | 1176 | N   | ASP | B | 80 | 65.932 | 32.211 | 6.986  | 1.00  | 67.32 |      | N |
| ANISOU | 1176 | N   | ASP | B | 80 | 8300   | 8409   | 8871   | -1246 | 945   | 847  | N |
| ATOM   | 1177 | CA  | ASP | B | 80 | 65.165 | 33.094 | 6.136  | 1.00  | 59.61 |      | C |
| ANISOU | 1177 | CA  | ASP | B | 80 | 7617   | 7272   | 7760   | -1209 | 832   | 731  | C |
| ATOM   | 1178 | CB  | ASP | B | 80 | 63.874 | 33.532 | 6.809  | 1.00  | 64.25 |      | C |
| ANISOU | 1178 | CB  | ASP | B | 80 | 8368   | 7790   | 8254   | -932  | 752   | 650  | C |
| ATOM   | 1179 | CG  | ASP | B | 80 | 64.096 | 34.201 | 8.129  | 1.00  | 73.01 |      | C |
| ANISOU | 1179 | CG  | ASP | B | 80 | 9624   | 8901   | 9217   | -897  | 621   | 691  | C |
| ATOM   | 1180 | OD1 | ASP | B | 80 | 65.112 | 33.955 | 8.770  | 1.00  | 71.77 |      | O |
| ANISOU | 1180 | OD1 | ASP | B | 80 | 9341   | 8839   | 9089   | -1027 | 642   | 794  | O |
| ATOM   | 1181 | OD2 | ASP | B | 80 | 63.236 | 34.969 | 8.551  | 1.00  | 68.10 |      | O |
| ANISOU | 1181 | OD2 | ASP | B | 80 | 9242   | 8183   | 8449   | -734  | 496   | 619  | O |
| ATOM   | 1182 | C   | ASP | B | 80 | 65.974 | 34.298 | 5.781  | 1.00  | 60.01 |      | C |
| ANISOU | 1182 | C   | ASP | B | 80 | 7968   | 7221   | 7610   | -1442 | 657   | 736  | C |
| ATOM   | 1183 | O   | ASP | B | 80 | 65.613 | 35.029 | 4.894  | 1.00  | 60.24 |      | O |
| ANISOU | 1183 | O   | ASP | B | 80 | 8232   | 7124   | 7534   | -1477 | 567   | 653  | O |
| ATOM   | 1184 | N   | LEU | B | 81 | 67.072 | 34.497 | 6.499  | 1.00  | 73.01 |      | N |
| ANISOU | 1184 | N   | LEU | B | 81 | 9607   | 8928   | 9207   | -1599 | 609   | 835  | N |
| ATOM   | 1185 | CA  | LEU | B | 81 | 67.963 | 35.647 | 6.363  | 1.00  | 70.89 |      | C |
| ANISOU | 1185 | CA  | LEU | B | 81 | 9616   | 8576   | 8742   | -1828 | 434   | 858  | C |

|        |      |     |     |   |    |        |        |        |       |       |      |   |
|--------|------|-----|-----|---|----|--------|--------|--------|-------|-------|------|---|
| ATOM   | 1186 | CB  | LEU | B | 81 | 67.461 | 36.774 | 7.264  | 1.00  | 66.09 | C    |   |
| ANISOU | 1186 | CB  | LEU | B | 81 | 9323   | 7870   | 7917   | -1712 | 242   | 817  | C |
| ATOM   | 1187 | CG  | LEU | B | 81 | 66.107 | 37.415 | 7.007  | 1.00  | 65.02 | C    |   |
| ANISOU | 1187 | CG  | LEU | B | 81 | 9428   | 7600   | 7675   | -1506 | 153   | 686  | C |
| ATOM   | 1188 | CD1 | LEU | B | 81 | 65.543 | 37.892 | 8.326  | 1.00  | 74.63 | C    |   |
| ANISOU | 1188 | CD1 | LEU | B | 81 | 10778  | 8801   | 8777   | -1314 | 51    | 677  | C |
| ATOM   | 1189 | CD2 | LEU | B | 81 | 66.283 | 38.584 | 6.068  | 1.00  | 74.67 | C    |   |
| ANISOU | 1189 | CD2 | LEU | B | 81 | 10982  | 8672   | 8717   | -1666 | -7    | 626  | C |
| ATOM   | 1190 | C   | LEU | B | 81 | 69.402 | 35.281 | 6.751  | 1.00  | 67.85 | C    |   |
| ANISOU | 1190 | C   | LEU | B | 81 | 9059   | 8309   | 8413   | -2051 | 479   | 992  | C |
| ATOM   | 1191 | O   | LEU | B | 81 | 69.606 | 34.541 | 7.718  | 1.00  | 66.22 | O    |   |
| ANISOU | 1191 | O   | LEU | B | 81 | 8621   | 8226   | 8312   | -1981 | 571   | 1066 | O |
| ATOM   | 1192 | N   | TYR | B | 82 | 70.386 | 35.813 | 6.022  | 1.00  | 67.35 | N    |   |
| ANISOU | 1192 | N   | TYR | B | 82 | 9112   | 8206   | 8273   | -2317 | 411   | 1022 | N |
| ATOM   | 1193 | CA  | TYR | B | 82 | 71.803 | 35.589 | 6.328  | 1.00  | 70.96 | C    |   |
| ANISOU | 1193 | CA  | TYR | B | 82 | 9438   | 8761   | 8761   | -2549 | 436   | 1149 | C |
| ATOM   | 1194 | CB  | TYR | B | 82 | 72.155 | 34.099 | 6.201  | 1.00  | 70.52 | C    |   |
| ANISOU | 1194 | CB  | TYR | B | 82 | 8960   | 8866   | 8967   | -2557 | 668   | 1218 | C |
| ATOM   | 1195 | CG  | TYR | B | 82 | 71.828 | 33.480 | 4.852  | 1.00  | 76.27 | C    |   |
| ANISOU | 1195 | CG  | TYR | B | 82 | 9559   | 9586   | 9833   | -2573 | 794   | 1163 | C |
| ATOM   | 1196 | CD1 | TYR | B | 82 | 72.719 | 33.576 | 3.783  | 1.00  | 71.23 | C    |   |
| ANISOU | 1196 | CD1 | TYR | B | 82 | 8928   | 8937   | 9201   | -2826 | 801   | 1189 | C |
| ATOM   | 1197 | CE1 | TYR | B | 82 | 72.427 | 33.010 | 2.564  | 1.00  | 78.64 | C    |   |
| ANISOU | 1197 | CE1 | TYR | B | 82 | 9747   | 9868   | 10263  | -2840 | 916   | 1139 | C |
| ATOM   | 1198 | CZ  | TYR | B | 82 | 71.224 | 32.343 | 2.385  | 1.00  | 81.08 | C    |   |
| ANISOU | 1198 | CZ  | TYR | B | 82 | 9933   | 10180  | 10694  | -2599 | 1023  | 1062 | C |
| ATOM   | 1199 | OH  | TYR | B | 82 | 70.915 | 31.777 | 1.163  | 1.00  | 83.70 | O    |   |
| ANISOU | 1199 | OH  | TYR | B | 82 | 10149  | 10503  | 11151  | -2611 | 1138  | 1012 | O |
| ATOM   | 1200 | CE2 | TYR | B | 82 | 70.325 | 32.242 | 3.424  | 1.00  | 74.98 | C    |   |
| ANISOU | 1200 | CE2 | TYR | B | 82 | 9153   | 9418   | 9916   | -2347 | 1017  | 1036 | C |
| ATOM   | 1201 | CD2 | TYR | B | 82 | 70.628 | 32.808 | 4.645  | 1.00  | 76.32 | C    |   |
| ANISOU | 1201 | CD2 | TYR | B | 82 | 9441   | 9597   | 9962   | -2334 | 903   | 1086 | C |
| ATOM   | 1202 | C   | TYR | B | 82 | 72.728 | 36.418 | 5.421  | 1.00  | 73.51 | C    |   |
| ANISOU | 1202 | C   | TYR | B | 82 | 9964   | 9007   | 8959   | -2830 | 325   | 1161 | C |
| ATOM   | 1203 | O   | TYR | B | 82 | 72.348 | 36.787 | 4.317  | 1.00  | 76.07 | O    |   |
| ANISOU | 1203 | O   | TYR | B | 82 | 10425  | 9233   | 9245   | -2862 | 292   | 1080 | O |
| ATOM   | 1204 | N   | PRO | B | 83 | 73.959 | 36.700 | 5.880  | 1.00  | 77.41 | N    |   |
| ANISOU | 1204 | N   | PRO | B | 83 | 10472  | 9547   | 9392   | -3038 | 268   | 1266 | N |
| ATOM   | 1205 | CA  | PRO | B | 83 | 74.929 | 37.446 | 5.075  | 1.00  | 81.85 | C    |   |
| ANISOU | 1205 | CA  | PRO | B | 83 | 11210  | 10049  | 9841   | -3316 | 165   | 1291 | C |
| ATOM   | 1206 | CB  | PRO | B | 83 | 75.980 | 37.824 | 6.119  | 1.00  | 78.92 | C    |   |
| ANISOU | 1206 | CB  | PRO | B | 83 | 10879  | 9729   | 9379   | -3450 | 80    | 1402 | C |
| ATOM   | 1207 | CG  | PRO | B | 83 | 75.996 | 36.643 | 6.990  | 1.00  | 75.55 | C    |   |
| ANISOU | 1207 | CG  | PRO | B | 83 | 10112  | 9455   | 9139   | -3333 | 248   | 1472 | C |
| ATOM   | 1208 | CD  | PRO | B | 83 | 74.511 | 36.446 | 7.221  | 1.00  | 81.39 | C    |   |
| ANISOU | 1208 | CD  | PRO | B | 83 | 10860  | 10156  | 9911   | -3027 | 277   | 1367 | C |
| ATOM   | 1209 | C   | PRO | B | 83 | 75.564 | 36.645 | 3.926  | 1.00  | 84.99 | C    |   |
| ANISOU | 1209 | C   | PRO | B | 83 | 11378  | 10512  | 10402  | -3487 | 314   | 1323 | C |
| ATOM   | 1210 | O   | PRO | B | 83 | 75.829 | 35.447 | 4.048  | 1.00  | 85.41 | O    |   |
| ANISOU | 1210 | O   | PRO | B | 83 | 11090  | 10702  | 10661  | -3472 | 499   | 1385 | O |
| ATOM   | 1211 | N   | VAL | B | 84 | 75.752 | 37.326 | 2.803  | 1.00  | 91.32 | N    |   |
| ANISOU | 1211 | N   | VAL | B | 84 | 12376  | 11212  | 11110  | -3640 | 230   | 1276 | N |
| ATOM   | 1212 | CA  | VAL | B | 84 | 76.476 | 36.805 | 1.645  | 1.00  | 92.73 | C    |   |
| ANISOU | 1212 | CA  | VAL | B | 84 | 12397  | 11433  | 11402  | -3840 | 335   | 1307 | C |
| ATOM   | 1213 | CB  | VAL | B | 84 | 75.710 | 37.018 | 0.353  | 1.00  | 87.14 | C    |   |
| ANISOU | 1213 | CB  | VAL | B | 84 | 11803  | 10618  | 10689  | -3808 | 331   | 1192 | C |
| ATOM   | 1214 | CG1 | VAL | B | 84 | 76.289 | 36.138 | -0.729 | 1.00  | 94.29 | C    |   |
| ANISOU | 1214 | CG1 | VAL | B | 84 | 12460  | 11598  | 11769  | -3957 | 491   | 1224 | C |
| ATOM   | 1215 | CG2 | VAL | B | 84 | 74.254 | 36.689 | 0.537  | 1.00  | 74.06 | C    |   |
| ANISOU | 1215 | CG2 | VAL | B | 84 | 10120  | 8930   | 9089   | -3508 | 384   | 1093 | C |
| ATOM   | 1216 | C   | VAL | B | 84 | 77.787 | 37.573 | 1.447  | 1.00  | 90.80 | C    |   |
| ANISOU | 1216 | C   | VAL | B | 84 | 12305  | 11168  | 11024  | -4135 | 213   | 1384 | C |
| ATOM   | 1217 | O   | VAL | B | 84 | 78.704 | 37.099 | 0.806  | 1.00  | 92.22 | O    |   |

|        |      |     |     |   |    |        |        |       |       |        |      |   |
|--------|------|-----|-----|---|----|--------|--------|-------|-------|--------|------|---|
| ANISOU | 1217 | O   | VAL | B | 84 | 12307  | 11427  | 11307 | -4203 | 288    | 1406 | O |
| ATOM   | 1218 | N   | THR | B | 85 | 77.842 | 38.781 | 1.995 | 1.00  | 99.35  |      | N |
| ANISOU | 1218 | N   | THR | B | 85 | 13708  | 12155  | 11886 | -4161 | 9      | 1373 | N |
| ATOM   | 1219 | CA  | THR | B | 85 | 78.963 | 39.686 | 1.928 | 1.00  | 104.51 |      | C |
| ANISOU | 1219 | CA  | THR | B | 85 | 14559  | 12771  | 12379 | -4417 | -139   | 1437 | C |
| ATOM   | 1220 | CB  | THR | B | 85 | 78.545 | 41.080 | 2.408 | 1.00  | 107.81 |      | C |
| ANISOU | 1220 | CB  | THR | B | 85 | 15371  | 13047  | 12546 | -4368 | -372   | 1379 | C |
| ATOM   | 1221 | OG1 | THR | B | 85 | 77.510 | 41.600 | 1.575 | 1.00  | 109.84 |      | O |
| ANISOU | 1221 | OG1 | THR | B | 85 | 15828  | 13171  | 12735 | -4264 | -433   | 1247 | O |
| ATOM   | 1222 | CG2 | THR | B | 85 | 79.726 | 42.029 | 2.390 | 1.00  | 103.19 |      | C |
| ANISOU | 1222 | CG2 | THR | B | 85 | 14992  | 12424  | 11791 | -4635 | -531   | 1451 | C |
| ATOM   | 1223 | C   | THR | B | 85 | 80.057 | 39.316 | 2.873 | 1.00  | 104.99 |      | C |
| ANISOU | 1223 | C   | THR | B | 85 | 14450  | 12962  | 12482 | -4499 | -105   | 1563 | C |
| ATOM   | 1224 | O   | THR | B | 85 | 79.805 | 39.093 | 4.029 | 1.00  | 101.00 |      | O |
| ANISOU | 1224 | O   | THR | B | 85 | 13884  | 12502  | 11988 | -4386 | -91    | 1603 | O |
| ATOM   | 1225 | N   | LEU | B | 86 | 81.292 | 39.318 | 2.405 | 1.00  | 114.54 |      | N |
| ANISOU | 1225 | N   | LEU | B | 86 | 15568  | 14243  | 13708 | -4542 | -111   | 1568 | N |
| ATOM   | 1226 | CA  | LEU | B | 86 | 82.410 | 38.988 | 3.258 | 1.00  | 115.91 |      | C |
| ANISOU | 1226 | CA  | LEU | B | 86 | 15577  | 14540  | 13924 | -4539 | -86    | 1650 | C |
| ATOM   | 1227 | CB  | LEU | B | 86 | 83.687 | 39.085 | 2.470 | 1.00  | 120.82 |      | C |
| ANISOU | 1227 | CB  | LEU | B | 86 | 16149  | 15207  | 14551 | -4589 | -101   | 1637 | C |
| ATOM   | 1228 | CG  | LEU | B | 86 | 84.889 | 38.501 | 3.171 | 1.00  | 112.96 |      | C |
| ANISOU | 1228 | CG  | LEU | B | 86 | 14934  | 14338  | 13646 | -4552 | -37    | 1705 | C |
| ATOM   | 1229 | CD1 | LEU | B | 86 | 84.571 | 37.061 | 3.501 | 1.00  | 111.99 |      | C |
| ANISOU | 1229 | CD1 | LEU | B | 86 | 14467  | 14307  | 13776 | -4357 | 176    | 1706 | C |
| ATOM   | 1230 | CD2 | LEU | B | 86 | 86.054 | 38.571 | 2.205 | 1.00  | 122.45 |      | C |
| ANISOU | 1230 | CD2 | LEU | B | 86 | 16101  | 15566  | 14859 | -4591 | -44    | 1681 | C |
| ATOM   | 1231 | C   | LEU | B | 86 | 82.561 | 39.750 | 4.537 | 1.00  | 108.36 |      | C |
| ANISOU | 1231 | C   | LEU | B | 86 | 14817  | 13554  | 12800 | -4628 | -228   | 1731 | C |
| ATOM   | 1232 | O   | LEU | B | 86 | 82.858 | 39.193 | 5.560 | 1.00  | 104.09 |      | O |
| ANISOU | 1232 | O   | LEU | B | 86 | 14101  | 13112  | 12335 | -4571 | -162   | 1802 | O |
| ATOM   | 1233 | N   | TRP | B | 87 | 82.369 | 41.053 | 4.418 | 1.00  | 111.19 |      | N |
| ANISOU | 1233 | N   | TRP | B | 87 | 15553  | 13767  | 12928 | -4761 | -430   | 1714 | N |
| ATOM   | 1234 | CA  | TRP | B | 87 | 82.300 | 41.983 | 5.532 | 1.00  | 109.00 |      | C |
| ANISOU | 1234 | CA  | TRP | B | 87 | 15552  | 13407  | 12455 | -4844 | -600   | 1778 | C |
| ATOM   | 1235 | C   | TRP | B | 87 | 80.995 | 41.830 | 6.289 | 1.00  | 98.87  |      | C |
| ANISOU | 1235 | C   | TRP | B | 87 | 14284  | 12096  | 11186 | -4564 | -584   | 1710 | C |
| ATOM   | 1236 | O   | TRP | B | 87 | 80.916 | 41.990 | 7.479 | 1.00  | 106.76 |      | O |
| ANISOU | 1236 | O   | TRP | B | 87 | 15315  | 13116  | 12131 | -4466 | -634   | 1743 | O |
| ATOM   | 1237 | CB  | TRP | B | 87 | 82.527 | 43.426 | 5.064 | 1.00  | 120.81 |      | C |
| ANISOU | 1237 | CB  | TRP | B | 87 | 17439  | 14756  | 13708 | -4986 | -827   | 1738 | C |
| ATOM   | 1238 | CG  | TRP | B | 87 | 83.971 | 43.687 | 4.949 | 1.00  | 128.47 |      | C |
| ANISOU | 1238 | CG  | TRP | B | 87 | 18357  | 15820  | 14638 | -5076 | -875   | 1771 | C |
| ATOM   | 1239 | CD1 | TRP | B | 87 | 84.718 | 43.650 | 3.826 | 1.00  | 129.55 |      | C |
| ANISOU | 1239 | CD1 | TRP | B | 87 | 18413  | 16005  | 14807 | -5108 | -850   | 1727 | C |
| ATOM   | 1240 | CD2 | TRP | B | 87 | 84.870 | 43.919 | 6.024 | 1.00  | 140.46 |      | C |
| ANISOU | 1240 | CD2 | TRP | B | 87 | 19874  | 17404  | 16091 | -5132 | -940   | 1862 | C |
| ATOM   | 1241 | NE1 | TRP | B | 87 | 86.027 | 43.872 | 4.125 | 1.00  | 132.06 |      | N |
| ANISOU | 1241 | NE1 | TRP | B | 87 | 18692  | 16408  | 15078 | -5182 | -899   | 1784 | N |
| ATOM   | 1242 | CE2 | TRP | B | 87 | 86.146 | 44.042 | 5.476 | 1.00  | 144.93 |      | C |
| ANISOU | 1242 | CE2 | TRP | B | 87 | 20368  | 18051  | 16648 | -5200 | -956   | 1865 | C |
| ATOM   | 1243 | CE3 | TRP | B | 87 | 84.716 | 44.045 | 7.401 | 1.00  | 139.77 |      | C |
| ANISOU | 1243 | CE3 | TRP | B | 87 | 19848  | 17312  | 15948 | -5126 | -987   | 1944 | C |
| ATOM   | 1244 | CZ2 | TRP | B | 87 | 87.264 | 44.292 | 6.253 | 1.00  | 150.43 |      | C |
| ANISOU | 1244 | CZ2 | TRP | B | 87 | 21052  | 18821  | 17284 | -5267 | -1019  | 1941 | C |
| ATOM   | 1245 | CZ3 | TRP | B | 87 | 85.822 | 44.294 | 8.168 | 1.00  | 142.63 |      | C |
| ANISOU | 1245 | CZ3 | TRP | B | 87 | 20192  | 17750  | 16251 | -5193 | -1050  | 2019 | C |
| ATOM   | 1246 | CH2 | TRP | B | 87 | 87.079 | 44.417 | 7.598 | 1.00  | 144.35 |      | C |
| ANISOU | 1246 | CH2 | TRP | B | 87 | 20337  | 18045  | 16463 | -5264 | -1066  | 2015 | C |
| ATOM   | 1247 | N   | GLY | B | 88 | 79.962 | 41.555 | 5.528 | 1.00  | 100.23 |      | N |
| ANISOU | 1247 | N   | GLY | B | 88 | 14393  | 11918  | 11774 | -3411 | -457   | 899  | N |
| ATOM   | 1248 | CA  | GLY | B | 88 | 78.586 | 41.393 | 5.942 | 1.00  | 101.38 |      | C |
| ANISOU | 1248 | CA  | GLY | B | 88 | 14628  | 11894  | 11997 | -3362 | -460   | 819  | C |

|        |      |     |     |   |    |        |        |        |       |        |      |   |
|--------|------|-----|-----|---|----|--------|--------|--------|-------|--------|------|---|
| ATOM   | 1249 | C   | GLY | B | 88 | 78.694 | 40.251 | 6.920  | 1.00  | 89.26  | C    |   |
| ANISOU | 1249 | C   | GLY | B | 88 | 13074  | 10463  | 10377  | -3201 | -361   | 812  | C |
| ATOM   | 1250 | O   | GLY | B | 88 | 78.069 | 40.256 | 7.956  | 1.00  | 78.77  | O    |   |
| ANISOU | 1250 | O   | GLY | B | 88 | 11756  | 9099   | 9076   | -3156 | -372   | 733  | O |
| ATOM   | 1251 | N   | ARG | B | 89 | 79.401 | 39.238 | 6.566  | 1.00  | 87.86  | N    |   |
| ANISOU | 1251 | N   | ARG | B | 89 | 12876  | 10405  | 10101  | -3114 | -266   | 891  | N |
| ATOM   | 1252 | CA  | ARG | B | 89 | 79.586 | 38.074 | 7.397  | 1.00  | 84.31  | C    |   |
| ANISOU | 1252 | CA  | ARG | B | 89 | 12408  | 10061  | 9566   | -2960 | -171   | 895  | C |
| ATOM   | 1253 | CB  | ARG | B | 89 | 80.248 | 36.933 | 6.600  | 1.00  | 85.76  | C    |   |
| ANISOU | 1253 | CB  | ARG | B | 89 | 12588  | 10340  | 9656   | -2874 | -69    | 992  | C |
| ATOM   | 1254 | CG  | ARG | B | 89 | 79.328 | 36.329 | 5.547  | 1.00  | 87.92  | C    |   |
| ANISOU | 1254 | CG  | ARG | B | 89 | 12974  | 10460  | 9970   | -2841 | -23    | 1016 | C |
| ATOM   | 1255 | CD  | ARG | B | 89 | 79.840 | 35.155 | 4.710  | 1.00  | 88.18  | C    |   |
| ANISOU | 1255 | CD  | ARG | B | 89 | 13014  | 10569  | 9920   | -2750 | 79     | 1105 | C |
| ATOM   | 1256 | NE  | ARG | B | 89 | 78.738 | 34.604 | 3.900  | 1.00  | 89.48  | N    |   |
| ANISOU | 1256 | NE  | ARG | B | 89 | 13298  | 10564  | 10137  | -2710 | 116    | 1111 | N |
| ATOM   | 1257 | CZ  | ARG | B | 89 | 78.861 | 33.772 | 2.871  | 1.00  | 87.10  | C    |   |
| ANISOU | 1257 | CZ  | ARG | B | 89 | 13031  | 10264  | 9798   | -2658 | 187    | 1182 | C |
| ATOM   | 1258 | NH1 | ARG | B | 89 | 80.039 | 33.361 | 2.475  | 1.00  | 92.10  | N    |   |
| ANISOU | 1258 | NH1 | ARG | B | 89 | 13591  | 11064  | 10341  | -2638 | 232    | 1253 | N |
| ATOM   | 1259 | NH2 | ARG | B | 89 | 77.792 | 33.358 | 2.229  | 1.00  | 81.51  | N    |   |
| ANISOU | 1259 | NH2 | ARG | B | 89 | 12433  | 9390   | 9146   | -2627 | 213    | 1178 | N |
| ATOM   | 1260 | C   | ARG | B | 89 | 80.322 | 38.372 | 8.702  | 1.00  | 94.33  | C    |   |
| ANISOU | 1260 | C   | ARG | B | 89 | 13576  | 11479  | 10786  | -2948 | -196   | 860  | C |
| ATOM   | 1261 | O   | ARG | B | 89 | 79.949 | 37.873 | 9.736  | 1.00  | 90.32  | O    |   |
| ANISOU | 1261 | O   | ARG | B | 89 | 13073  | 10985  | 10258  | -2856 | -165   | 813  | O |
| ATOM   | 1262 | N   | CYS | B | 90 | 81.343 | 39.211 | 8.684  | 1.00  | 95.67  | N    |   |
| ANISOU | 1262 | N   | CYS | B | 90 | 13654  | 11758  | 10938  | -3045 | -256   | 882  | N |
| ATOM   | 1263 | CA  | CYS | B | 90 | 82.077 | 39.465 | 9.922  | 1.00  | 91.66  | C    |   |
| ANISOU | 1263 | CA  | CYS | B | 90 | 13049  | 11395  | 10381  | -3029 | -278   | 852  | C |
| ATOM   | 1264 | CB  | CYS | B | 90 | 83.193 | 40.474 | 9.702  | 1.00  | 101.86 | C    |   |
| ANISOU | 1264 | CB  | CYS | B | 90 | 14246  | 12793  | 11663  | -3151 | -350   | 883  | C |
| ATOM   | 1265 | SG  | CYS | B | 90 | 84.580 | 39.873 | 8.726  | 1.00  | 115.71 | S    |   |
| ANISOU | 1265 | SG  | CYS | B | 90 | 15938  | 14716  | 13310  | -3138 | -282   | 1002 | S |
| ATOM   | 1266 | C   | CYS | B | 90 | 81.157 | 39.992 | 10.985 | 1.00  | 86.30  | C    |   |
| ANISOU | 1266 | C   | CYS | B | 90 | 12393  | 10622  | 9773   | -3037 | -335   | 746  | C |
| ATOM   | 1267 | O   | CYS | B | 90 | 81.190 | 39.562 | 12.106 | 1.00  | 97.46  | O    |   |
| ANISOU | 1267 | O   | CYS | B | 90 | 13779  | 12109  | 11144  | -2953 | -305   | 710  | O |
| ATOM   | 1268 | N   | VAL | B | 91 | 80.306 | 40.917 | 10.622 | 1.00  | 80.26  | N    |   |
| ANISOU | 1268 | N   | VAL | B | 91 | 11681  | 9694   | 9120   | -3140 | -419   | 694  | N |
| ATOM   | 1269 | CA  | VAL | B | 91 | 79.320 | 41.445 | 11.572 | 1.00  | 76.24  | C    |   |
| ANISOU | 1269 | CA  | VAL | B | 91 | 11199  | 9081   | 8688   | -3151 | -477   | 584  | C |
| ATOM   | 1270 | CB  | VAL | B | 91 | 78.307 | 42.392 | 10.895 | 1.00  | 81.62  | C    |   |
| ANISOU | 1270 | CB  | VAL | B | 91 | 11953  | 9558   | 9502   | -3265 | -567   | 534  | C |
| ATOM   | 1271 | CG1 | VAL | B | 91 | 77.300 | 42.914 | 11.914 | 1.00  | 83.26  | C    |   |
| ANISOU | 1271 | CG1 | VAL | B | 91 | 12182  | 9665   | 9788   | -3272 | -626   | 413  | C |
| ATOM   | 1272 | CG2 | VAL | B | 91 | 79.025 | 43.546 | 10.219 | 1.00  | 88.13  | C    |   |
| ANISOU | 1272 | CG2 | VAL | B | 91 | 12726  | 10401  | 10360  | -3415 | -664   | 566  | C |
| ATOM   | 1273 | C   | VAL | B | 91 | 78.562 | 40.296 | 12.237 | 1.00  | 79.36  | C    |   |
| ANISOU | 1273 | C   | VAL | B | 91 | 11650  | 9451   | 9051   | -3006 | -387   | 554  | C |
| ATOM   | 1274 | O   | VAL | B | 91 | 78.276 | 40.338 | 13.436 | 1.00  | 81.31  | O    |   |
| ANISOU | 1274 | O   | VAL | B | 91 | 11875  | 9721   | 9296   | -2967 | -397   | 481  | O |
| ATOM   | 1275 | N   | ALA | B | 92 | 78.252 | 39.271 | 11.442 | 1.00  | 83.16  | N    |   |
| ANISOU | 1275 | N   | ALA | B | 92 | 12202  | 9887   | 9507   | -2928 | -300   | 611  | N |
| ATOM   | 1276 | CA  | ALA | B | 92 | 77.529 | 38.095 | 11.913 | 1.00  | 79.29  | C    |   |
| ANISOU | 1276 | CA  | ALA | B | 92 | 11774  | 9367   | 8986   | -2789 | -211   | 595  | C |
| ATOM   | 1277 | CB  | ALA | B | 92 | 77.313 | 37.122 | 10.783 | 1.00  | 81.29  | C    |   |
| ANISOU | 1277 | CB  | ALA | B | 92 | 12101  | 9568   | 9218   | -2727 | -130   | 670  | C |
| ATOM   | 1278 | C   | ALA | B | 92 | 78.271 | 37.414 | 13.054 | 1.00  | 80.80  | C    |   |
| ANISOU | 1278 | C   | ALA | B | 92 | 11893  | 9737   | 9071   | -2689 | -157   | 603  | C |
| ATOM   | 1279 | O   | ALA | B | 92 | 77.678 | 37.122 | 14.094 | 1.00  | 83.15  | O    |   |
| ANISOU | 1279 | O   | ALA | B | 92 | 12204  | 10022  | 9366   | -2626 | -143   | 538  | O |
| ATOM   | 1280 | N   | VAL | B | 93 | 79.567 | 37.219 | 12.902 | 1.00  | 82.17  | N    |   |

|        |      |     |     |   |    |        |        |        |       |       |     |   |
|--------|------|-----|-----|---|----|--------|--------|--------|-------|-------|-----|---|
| ANISOU | 1280 | N   | VAL | B | 93 | 11985  | 10077  | 9160   | -2681 | -133  | 677 | N |
| ATOM   | 1281 | CA  | VAL | B | 93 | 80.337 | 36.543 | 13.934 | 1.00  | 85.88 |     | C |
| ANISOU | 1281 | CA  | VAL | B | 93 | 12385  | 10719  | 9528   | -2585 | -83   | 689 | C |
| ATOM   | 1282 | CB  | VAL | B | 93 | 81.820 | 36.411 | 13.502 | 1.00  | 72.86 |     | C |
| ANISOU | 1282 | CB  | VAL | B | 93 | 10645  | 9243   | 7794   | -2592 | -63   | 777 | C |
| ATOM   | 1283 | CG1 | VAL | B | 93 | 82.768 | 36.198 | 14.664 | 1.00  | 66.53 |     | C |
| ANISOU | 1283 | CG1 | VAL | B | 93 | 9749   | 8624   | 6907   | -2539 | -51   | 776 | C |
| ATOM   | 1284 | CG2 | VAL | B | 93 | 81.989 | 35.264 | 12.534 | 1.00  | 73.42 |     | C |
| ANISOU | 1284 | CG2 | VAL | B | 93 | 10756  | 9327   | 7812   | -2508 | 30    | 861 | C |
| ATOM   | 1285 | C   | VAL | B | 93 | 80.227 | 37.309 | 15.226 | 1.00  | 76.41 |     | C |
| ANISOU | 1285 | C   | VAL | B | 93 | 11135  | 9544   | 8351   | -2621 | -150  | 602 | C |
| ATOM   | 1286 | O   | VAL | B | 93 | 80.073 | 36.752 | 16.282 | 1.00  | 76.38 |     | O |
| ANISOU | 1286 | O   | VAL | B | 93 | 11124  | 9592   | 8303   | -2536 | -115  | 568 | O |
| ATOM   | 1287 | N   | VAL | B | 94 | 80.312 | 38.602 | 15.135 | 1.00  | 77.05 |     | N |
| ANISOU | 1287 | N   | VAL | B | 94 | 11183  | 9590   | 8502   | -2751 | -250  | 564 | N |
| ATOM   | 1288 | CA  | VAL | B | 94 | 80.252 | 39.424 | 16.326 | 1.00  | 77.22 |     | C |
| ANISOU | 1288 | CA  | VAL | B | 94 | 11152  | 9637   | 8551   | -2793 | -321  | 478 | C |
| ATOM   | 1289 | CB  | VAL | B | 94 | 80.489 | 40.911 | 15.990 | 1.00  | 75.38 |     | C |
| ANISOU | 1289 | CB  | VAL | B | 94 | 10877  | 9367   | 8398   | -2949 | -440  | 452 | C |
| ATOM   | 1290 | CG1 | VAL | B | 94 | 80.060 | 41.806 | 17.148 | 1.00  | 62.83 |     | C |
| ANISOU | 1290 | CG1 | VAL | B | 94 | 9256   | 7753   | 6864   | -2995 | -523  | 343 | C |
| ATOM   | 1291 | CG2 | VAL | B | 94 | 81.947 | 41.142 | 15.617 | 1.00  | 76.17 |     | C |
| ANISOU | 1291 | CG2 | VAL | B | 94 | 10884  | 9625   | 8433   | -2992 | -448  | 534 | C |
| ATOM   | 1292 | C   | VAL | B | 94 | 78.907 | 39.240 | 17.009 | 1.00  | 74.65 |     | C |
| ANISOU | 1292 | C   | VAL | B | 94 | 10900  | 9186   | 8278   | -2749 | -317  | 387 | C |
| ATOM   | 1293 | O   | VAL | B | 94 | 78.846 | 39.084 | 18.221 | 1.00  | 81.65 |     | O |
| ANISOU | 1293 | O   | VAL | B | 94 | 11756  | 10137  | 9132   | -2699 | -310  | 334 | O |
| ATOM   | 1294 | N   | VAL | B | 95 | 77.841 | 39.204 | 16.218 | 1.00  | 75.62 |     | N |
| ANISOU | 1294 | N   | VAL | B | 95 | 11121  | 9134   | 8479   | -2765 | -316  | 371 | N |
| ATOM   | 1295 | CA  | VAL | B | 95 | 76.488 | 39.026 | 16.735 | 1.00  | 79.37 |     | C |
| ANISOU | 1295 | CA  | VAL | B | 95 | 11672  | 9475   | 9011   | -2728 | -311  | 284 | C |
| ATOM   | 1296 | CB  | VAL | B | 95 | 75.434 | 39.090 | 15.584 | 1.00  | 84.27 |     | C |
| ANISOU | 1296 | CB  | VAL | B | 95 | 12399  | 9895   | 9725   | -2763 | -318  | 280 | C |
| ATOM   | 1297 | CG1 | VAL | B | 95 | 74.026 | 38.790 | 16.108 | 1.00  | 74.63 |     | C |
| ANISOU | 1297 | CG1 | VAL | B | 95 | 11260  | 8539   | 8558   | -2713 | -303  | 192 | C |
| ATOM   | 1298 | CG2 | VAL | B | 95 | 75.465 | 40.442 | 14.899 | 1.00  | 81.90 |     | C |
| ANISOU | 1298 | CG2 | VAL | B | 95 | 12087  | 9512   | 9520   | -2914 | -430  | 261 | C |
| ATOM   | 1299 | C   | VAL | B | 95 | 76.367 | 37.690 | 17.481 | 1.00  | 80.91 |     | C |
| ANISOU | 1299 | C   | VAL | B | 95 | 11885  | 9742   | 9115   | -2580 | -208  | 297 | C |
| ATOM   | 1300 | O   | VAL | B | 95 | 75.814 | 37.622 | 18.586 | 1.00  | 78.18 |     | O |
| ANISOU | 1300 | O   | VAL | B | 95 | 11540  | 9395   | 8769   | -2543 | -209  | 220 | O |
| ATOM   | 1301 | N   | MET | B | 96 | 76.878 | 36.631 | 16.858 | 1.00  | 80.22 |     | N |
| ANISOU | 1301 | N   | MET | B | 96 | 11811  | 9716   | 8951   | -2498 | -122  | 394 | N |
| ATOM   | 1302 | CA  | MET | B | 96 | 76.836 | 35.290 | 17.435 | 1.00  | 81.30 |     | C |
| ANISOU | 1302 | CA  | MET | B | 96 | 11968  | 9923   | 9000   | -2356 | -26   | 420 | C |
| ATOM   | 1303 | CB  | MET | B | 96 | 77.474 | 34.295 | 16.456 | 1.00  | 83.15 |     | C |
| ANISOU | 1303 | CB  | MET | B | 96 | 12215  | 10212  | 9167   | -2287 | 53    | 533 | C |
| ATOM   | 1304 | CG  | MET | B | 96 | 76.820 | 34.207 | 15.066 | 1.00  | 82.11 |     | C |
| ANISOU | 1304 | CG  | MET | B | 96 | 12172  | 9926   | 9100   | -2311 | 66    | 565 | C |
| ATOM   | 1305 | SD  | MET | B | 96 | 77.827 | 33.232 | 13.909 | 1.00  | 92.23 |     | S |
| ANISOU | 1305 | SD  | MET | B | 96 | 13441  | 11304  | 10297  | -2249 | 145   | 696 | S |
| ATOM   | 1306 | CE  | MET | B | 96 | 76.887 | 33.355 | 12.388 | 1.00  | 91.20 |     | C |
| ANISOU | 1306 | CE  | MET | B | 96 | 13419  | 10971  | 10260  | -2298 | 142   | 714 | C |
| ATOM   | 1307 | C   | MET | B | 96 | 77.557 | 35.186 | 18.787 | 1.00  | 83.71 |     | C |
| ANISOU | 1307 | C   | MET | B | 96 | 12187  | 10395  | 9225   | -2316 | -23   | 400 | C |
| ATOM   | 1308 | O   | MET | B | 96 | 76.963 | 34.827 | 19.813 | 1.00  | 86.95 |     | O |
| ANISOU | 1308 | O   | MET | B | 96 | 12614  | 10802  | 9620   | -2258 | -5    | 342 | O |
| ATOM   | 1309 | N   | VAL | B | 97 | 78.837 | 35.546 | 18.774 | 1.00  | 85.53 |     | N |
| ANISOU | 1309 | N   | VAL | B | 97 | 12323  | 10768  | 9406   | -2352 | -46   | 448 | N |
| ATOM   | 1310 | CA  | VAL | B | 97 | 79.693 | 35.482 | 19.956 | 1.00  | 84.26 |     | C |
| ANISOU | 1310 | CA  | VAL | B | 97 | 12073  | 10776  | 9167   | -2319 | -47   | 440 | C |
| ATOM   | 1311 | CB  | VAL | B | 97 | 81.168 | 35.781 | 19.572 | 1.00  | 76.96 |     | C |
| ANISOU | 1311 | CB  | VAL | B | 97 | 11053  | 9999   | 8190   | -2358 | -62   | 513 | C |

|        |      |     |     |   |     |        |        |        |       |        |      |   |
|--------|------|-----|-----|---|-----|--------|--------|--------|-------|--------|------|---|
| ATOM   | 1312 | CG1 | VAL | B | 97  | 81.982 | 36.185 | 20.772 | 1.00  | 88.41  |      | C |
| ANISOU | 1312 | CG1 | VAL | B | 97  | 12404  | 11596  | 9591   | -2367 | -98    | 485  | C |
| ATOM   | 1313 | CG2 | VAL | B | 97  | 81.787 | 34.565 | 18.878 | 1.00  | 74.25  |      | C |
| ANISOU | 1313 | CG2 | VAL | B | 97  | 10718  | 9730   | 7764   | -2262 | 29     | 615  | C |
| ATOM   | 1314 | C   | VAL | B | 97  | 79.192 | 36.424 | 21.057 | 1.00  | 82.86  |      | C |
| ANISOU | 1314 | C   | VAL | B | 97  | 11871  | 10572  | 9042   | -2379 | -122   | 331  | C |
| ATOM   | 1315 | O   | VAL | B | 97  | 79.248 | 36.091 | 22.243 | 1.00  | 82.62  |      | O |
| ANISOU | 1315 | O   | VAL | B | 97  | 11811  | 10625  | 8958   | -2322 | -105   | 295  | O |
| ATOM   | 1316 | N   | ALA | B | 98  | 78.679 | 37.585 | 20.657 | 1.00  | 80.68  |      | N |
| ANISOU | 1316 | N   | ALA | B | 98  | 11607  | 10177  | 8870   | -2495 | -207   | 275  | N |
| ATOM   | 1317 | CA  | ALA | B | 98  | 78.100 | 38.533 | 21.601 | 1.00  | 77.35  |      | C |
| ANISOU | 1317 | CA  | ALA | B | 98  | 11166  | 9711   | 8511   | -2557 | -285   | 163  | C |
| ATOM   | 1318 | CB  | ALA | B | 98  | 77.693 | 39.808 | 20.912 | 1.00  | 81.30  |      | C |
| ANISOU | 1318 | CB  | ALA | B | 98  | 11678  | 10082  | 9129   | -2689 | -383   | 119  | C |
| ATOM   | 1319 | C   | ALA | B | 98  | 76.900 | 37.896 | 22.270 | 1.00  | 80.33  |      | C |
| ANISOU | 1319 | C   | ALA | B | 98  | 11616  | 10008  | 8897   | -2482 | -242   | 96   | C |
| ATOM   | 1320 | O   | ALA | B | 98  | 76.686 | 38.050 | 23.468 | 1.00  | 88.93  |      | O |
| ANISOU | 1320 | O   | ALA | B | 98  | 12676  | 11141  | 9974   | -2469 | -258   | 23   | O |
| ATOM   | 1321 | N   | GLY | B | 99  | 76.110 | 37.188 | 21.475 | 1.00  | 85.47  |      | N |
| ANISOU | 1321 | N   | GLY | B | 99  | 12362  | 10540  | 9571   | -2436 | -186   | 122  | N |
| ATOM   | 1322 | CA  | GLY | B | 99  | 74.932 | 36.519 | 21.985 | 1.00  | 88.76  |      | C |
| ANISOU | 1322 | CA  | GLY | B | 99  | 12856  | 10872  | 9997   | -2364 | -141   | 67   | C |
| ATOM   | 1323 | C   | GLY | B | 99  | 75.268 | 35.304 | 22.835 | 1.00  | 89.39  |      | C |
| ANISOU | 1323 | C   | GLY | B | 99  | 12923  | 11080  | 9960   | -2239 | -56    | 102  | C |
| ATOM   | 1324 | O   | GLY | B | 99  | 74.697 | 35.129 | 23.914 | 1.00  | 89.36  |      | O |
| ANISOU | 1324 | O   | GLY | B | 99  | 12926  | 11085  | 9943   | -2205 | -48    | 32   | O |
| ATOM   | 1325 | N   | ILE | B | 100 | 76.172 | 34.451 | 22.341 | 1.00  | 85.36  |      | N |
| ANISOU | 1325 | N   | ILE | B | 100 | 12396  | 10668  | 9367   | -2173 | 7      | 209  | N |
| ATOM   | 1326 | CA  | ILE | B | 100 | 76.578 | 33.250 | 23.074 | 1.00  | 88.75  |      | C |
| ANISOU | 1326 | CA  | ILE | B | 100 | 12814  | 11223  | 9685   | -2053 | 84     | 253  | C |
| ATOM   | 1327 | CB  | ILE | B | 100 | 77.582 | 32.378 | 22.286 | 1.00  | 88.51  |      | C |
| ANISOU | 1327 | CB  | ILE | B | 100 | 12767  | 11284  | 9577   | -1988 | 145    | 372  | C |
| ATOM   | 1328 | CG1 | ILE | B | 100 | 76.994 | 31.948 | 20.947 | 1.00  | 84.89  |      | C |
| ANISOU | 1328 | CG1 | ILE | B | 100 | 12397  | 10693  | 9165   | -1973 | 182    | 419  | C |
| ATOM   | 1329 | CD1 | ILE | B | 100 | 77.972 | 31.182 | 20.094 | 1.00  | 89.28  |      | C |
| ANISOU | 1329 | CD1 | ILE | B | 100 | 12933  | 11336  | 9653   | -1918 | 237    | 530  | C |
| ATOM   | 1330 | CG2 | ILE | B | 100 | 77.954 | 31.137 | 23.098 | 1.00  | 82.93  |      | C |
| ANISOU | 1330 | CG2 | ILE | B | 100 | 12049  | 10700  | 8760   | -1863 | 216    | 411  | C |
| ATOM   | 1331 | C   | ILE | B | 100 | 77.207 | 33.578 | 24.423 | 1.00  | 88.70  |      | C |
| ANISOU | 1331 | C   | ILE | B | 100 | 12718  | 11359  | 9623   | -2059 | 53     | 212  | C |
| ATOM   | 1332 | O   | ILE | B | 100 | 76.912 | 32.924 | 25.431 | 1.00  | 89.87  |      | O |
| ANISOU | 1332 | O   | ILE | B | 100 | 12875  | 11553  | 9716   | -1987 | 90     | 185  | O |
| ATOM   | 1333 | N   | THR | B | 101 | 78.080 | 34.580 | 24.440 | 1.00  | 93.09  |      | N |
| ANISOU | 1333 | N   | THR | B | 101 | 13190  | 11987  | 10193  | -2145 | -14    | 209  | N |
| ATOM   | 1334 | CA  | THR | B | 101 | 78.739 | 34.983 | 25.673 | 1.00  | 90.77  |      | C |
| ANISOU | 1334 | CA  | THR | B | 101 | 12807  | 11829  | 9851   | -2157 | -49    | 171  | C |
| ATOM   | 1335 | CB  | THR | B | 101 | 79.838 | 36.028 | 25.403 | 1.00  | 88.76  |      | C |
| ANISOU | 1335 | CB  | THR | B | 101 | 12460  | 11653  | 9612   | -2252 | -120   | 191  | C |
| ATOM   | 1336 | OG1 | THR | B | 101 | 80.901 | 35.422 | 24.651 | 1.00  | 84.98  |      | O |
| ANISOU | 1336 | OG1 | THR | B | 101 | 11955  | 11268  | 9068   | -2212 | -74    | 301  | O |
| ATOM   | 1337 | CG2 | THR | B | 101 | 80.391 | 36.565 | 26.723 | 1.00  | 99.36  |      | C |
| ANISOU | 1337 | CG2 | THR | B | 101 | 13714  | 13118  | 10919  | -2272 | -166   | 138  | C |
| ATOM   | 1338 | C   | THR | B | 101 | 77.729 | 35.541 | 26.670 | 1.00  | 87.58  |      | C |
| ANISOU | 1338 | C   | THR | B | 101 | 12418  | 11359  | 9499   | -2190 | -92    | 51   | C |
| ATOM   | 1339 | O   | THR | B | 101 | 77.698 | 35.128 | 27.825 | 1.00  | 92.54  |      | O |
| ANISOU | 1339 | O   | THR | B | 101 | 13027  | 12067  | 10067  | -2137 | -71    | 18   | O |
| ATOM   | 1340 | N   | SER | B | 102 | 76.886 | 36.452 | 26.197 | 1.00  | 86.12  |      | N |
| ANISOU | 1340 | N   | SER | B | 102 | 12270  | 11026  | 9426   | -2277 | -153   | -16  | N |
| ATOM   | 1341 | CA  | SER | B | 102 | 75.885 | 37.100 | 27.041 | 1.00  | 95.26  |      | C |
| ANISOU | 1341 | CA  | SER | B | 102 | 13440  | 12108  | 10646  | -2319 | -202   | -140 | C |
| ATOM   | 1342 | CB  | SER | B | 102 | 74.980 | 38.003 | 26.194 | 1.00  | 107.53 |      | C |
| ANISOU | 1342 | CB  | SER | B | 102 | 15046  | 13480  | 12332  | -2411 | -266   | -197 | C |
| ATOM   | 1343 | OG  | SER | B | 102 | 73.965 | 38.616 | 26.971 | 1.00  | 118.24 |      | O |

|        |      |     |     |   |     |        |        |        |       |        |      |   |
|--------|------|-----|-----|---|-----|--------|--------|--------|-------|--------|------|---|
| ANISOU | 1343 | OG  | SER | B | 102 | 16415  | 14758  | 13755  | -2449 | -315   | -323 | O |
| ATOM   | 1344 | C   | SER | B | 102 | 75.021 | 36.101 | 27.803 | 1.00  | 93.55  |      | C |
| ANISOU | 1344 | C   | SER | B | 102 | 13281  | 11877  | 10385  | -2225 | -133   | -173 | C |
| ATOM   | 1345 | O   | SER | B | 102 | 74.900 | 36.188 | 29.022 | 1.00  | 96.78  |      | O |
| ANISOU | 1345 | O   | SER | B | 102 | 13656  | 12353  | 10763  | -2214 | -144   | -240 | O |
| ATOM   | 1346 | N   | PHE | B | 103 | 74.420 | 35.159 | 27.083 | 1.00  | 98.11  |      | N |
| ANISOU | 1346 | N   | PHE | B | 103 | 13948  | 12368  | 10960  | -2158 | -64    | -126 | N |
| ATOM   | 1347 | CA  | PHE | B | 103 | 73.603 | 34.126 | 27.717 | 1.00  | 99.85  |      | C |
| ANISOU | 1347 | CA  | PHE | B | 103 | 14230  | 12572  | 11136  | -2065 | 6      | -146 | C |
| ATOM   | 1348 | CB  | PHE | B | 103 | 72.842 | 33.300 | 26.672 | 1.00  | 95.94  |      | C |
| ANISOU | 1348 | CB  | PHE | B | 103 | 13840  | 11947  | 10667  | -2011 | 67     | -98  | C |
| ATOM   | 1349 | CG  | PHE | B | 103 | 71.601 | 33.963 | 26.135 | 1.00  | 86.01  |      | C |
| ANISOU | 1349 | CG  | PHE | B | 103 | 12651  | 10498  | 9532   | -2076 | 27     | -177 | C |
| ATOM   | 1350 | CD1 | PHE | B | 103 | 70.430 | 33.958 | 26.874 | 1.00  | 82.70  |      | C |
| ANISOU | 1350 | CD1 | PHE | B | 103 | 12273  | 10003  | 9144   | -2069 | 27     | -277 | C |
| ATOM   | 1351 | CE1 | PHE | B | 103 | 69.272 | 34.535 | 26.376 | 1.00  | 87.53  |      | C |
| ANISOU | 1351 | CE1 | PHE | B | 103 | 12949  | 10437  | 9872   | -2125 | -10    | -353 | C |
| ATOM   | 1352 | CZ  | PHE | B | 103 | 69.272 | 35.112 | 25.120 | 1.00  | 88.79  |      | C |
| ANISOU | 1352 | CZ  | PHE | B | 103 | 13133  | 10487  | 10115  | -2190 | -49    | -326 | C |
| ATOM   | 1353 | CE2 | PHE | B | 103 | 70.426 | 35.110 | 24.364 | 1.00  | 92.19  |      | C |
| ANISOU | 1353 | CE2 | PHE | B | 103 | 13524  | 10993  | 10511  | -2199 | -48    | -223 | C |
| ATOM   | 1354 | CD2 | PHE | B | 103 | 71.584 | 34.531 | 24.869 | 1.00  | 95.88  |      | C |
| ANISOU | 1354 | CD2 | PHE | B | 103 | 13925  | 11642  | 10863  | -2141 | -8     | -151 | C |
| ATOM   | 1355 | C   | PHE | B | 103 | 74.436 | 33.186 | 28.591 | 1.00  | 91.20  |      | C |
| ANISOU | 1355 | C   | PHE | B | 103 | 13091  | 11651  | 9912   | -1975 | 61     | -90  | C |
| ATOM   | 1356 | O   | PHE | B | 103 | 73.929 | 32.616 | 29.560 | 1.00  | 90.08  |      | O |
| ANISOU | 1356 | O   | PHE | B | 103 | 12968  | 11536  | 9723   | -1921 | 94     | -129 | O |
| ATOM   | 1357 | N   | GLY | B | 104 | 75.708 | 33.020 | 28.237 | 1.00  | 88.75  |      | N |
| ANISOU | 1357 | N   | GLY | B | 104 | 12721  | 11456  | 9543   | -1961 | 70     | 1    | N |
| ATOM   | 1358 | CA  | GLY | B | 104 | 76.605 | 32.158 | 28.989 | 1.00  | 96.39  |      | C |
| ANISOU | 1358 | CA  | GLY | B | 104 | 13643  | 12590  | 10392  | -1878 | 116    | 58   | C |
| ATOM   | 1359 | C   | GLY | B | 104 | 76.882 | 32.712 | 30.372 | 1.00  | 100.45 |      | C |
| ANISOU | 1359 | C   | GLY | B | 104 | 14083  | 13208  | 10875  | -1909 | 72     | -13  | C |
| ATOM   | 1360 | O   | GLY | B | 104 | 76.936 | 31.980 | 31.362 | 1.00  | 96.91  |      | O |
| ANISOU | 1360 | O   | GLY | B | 104 | 13629  | 12848  | 10345  | -1840 | 109    | -13  | O |
| ATOM   | 1361 | N   | LEU | B | 105 | 77.044 | 34.028 | 30.422 | 1.00  | 102.53 |      | N |
| ANISOU | 1361 | N   | LEU | B | 105 | 14291  | 13459  | 11207  | -2014 | -12    | -73  | N |
| ATOM   | 1362 | CA  | LEU | B | 105 | 77.282 | 34.748 | 31.657 | 1.00  | 94.41  |      | C |
| ANISOU | 1362 | CA  | LEU | B | 105 | 13189  | 12518  | 10166  | -2057 | -66    | -151 | C |
| ATOM   | 1363 | CB  | LEU | B | 105 | 77.845 | 36.145 | 31.343 | 1.00  | 97.84  |      | C |
| ANISOU | 1363 | CB  | LEU | B | 105 | 13551  | 12952  | 10670  | -2170 | -159   | -178 | C |
| ATOM   | 1364 | CG  | LEU | B | 105 | 78.368 | 37.084 | 32.429 | 1.00  | 115.26 |      | C |
| ANISOU | 1364 | CG  | LEU | B | 105 | 15663  | 15258  | 12871  | -2229 | -231   | -245 | C |
| ATOM   | 1365 | CD1 | LEU | B | 105 | 79.514 | 37.931 | 31.916 | 1.00  | 115.10 |      | C |
| ANISOU | 1365 | CD1 | LEU | B | 105 | 15564  | 15300  | 12869  | -2300 | -290   | -201 | C |
| ATOM   | 1366 | CD2 | LEU | B | 105 | 77.218 | 37.983 | 32.736 | 1.00  | 114.22 |      | C |
| ANISOU | 1366 | CD2 | LEU | B | 105 | 15554  | 15004  | 12838  | -2300 | -291   | -370 | C |
| ATOM   | 1367 | C   | LEU | B | 105 | 76.005 | 34.792 | 32.500 | 1.00  | 97.53  |      | C |
| ANISOU | 1367 | C   | LEU | B | 105 | 13630  | 12838  | 10590  | -2058 | -68    | -259 | C |
| ATOM   | 1368 | O   | LEU | B | 105 | 76.075 | 34.682 | 33.718 | 1.00  | 109.59 |      | O |
| ANISOU | 1368 | O   | LEU | B | 105 | 15120  | 14459  | 12060  | -2037 | -68    | -303 | O |
| ATOM   | 1369 | N   | VAL | B | 106 | 74.845 | 34.938 | 31.863 | 1.00  | 99.71  |      | N |
| ANISOU | 1369 | N   | VAL | B | 106 | 13984  | 12948  | 10953  | -2081 | -70    | -304 | N |
| ATOM   | 1370 | CA  | VAL | B | 106 | 73.563 | 34.903 | 32.580 | 1.00  | 97.55  |      | C |
| ANISOU | 1370 | CA  | VAL | B | 106 | 13760  | 12596  | 10709  | -2077 | -66    | -407 | C |
| ATOM   | 1371 | CB  | VAL | B | 106 | 72.353 | 35.152 | 31.658 | 1.00  | 93.55  |      | C |
| ANISOU | 1371 | CB  | VAL | B | 106 | 13340  | 11893  | 10312  | -2110 | -75    | -450 | C |
| ATOM   | 1372 | CG1 | VAL | B | 106 | 71.054 | 34.917 | 32.425 | 1.00  | 88.46  |      | C |
| ANISOU | 1372 | CG1 | VAL | B | 106 | 12748  | 11179  | 9683   | -2091 | -56    | -549 | C |
| ATOM   | 1373 | CG2 | VAL | B | 106 | 72.384 | 36.568 | 31.093 | 1.00  | 98.36  |      | C |
| ANISOU | 1373 | CG2 | VAL | B | 106 | 13915  | 12424  | 11034  | -2227 | -172   | -502 | C |
| ATOM   | 1374 | C   | VAL | B | 106 | 73.419 | 33.532 | 33.239 | 1.00  | 100.22 |      | C |
| ANISOU | 1374 | C   | VAL | B | 106 | 14134  | 13003  | 10940  | -1967 | 21     | -368 | C |

|        |      |     |     |   |     |        |        |        |            |      |      |   |
|--------|------|-----|-----|---|-----|--------|--------|--------|------------|------|------|---|
| ATOM   | 1375 | O   | VAL | B | 106 | 72.867 | 33.394 | 34.328 | 1.00103.06 | O    |      |   |
| ANISOU | 1375 | O   | VAL | B | 106 | 14496  | 13392  | 11272  | -1953      | 28   | -439 | O |
| ATOM   | 1376 | N   | THR | B | 107 | 73.912 | 32.510 | 32.549 | 1.00100.50 | N    |      |   |
| ANISOU | 1376 | N   | THR | B | 107 | 14202  | 13065  | 10920  | -1889      | 86   | -252 | N |
| ATOM   | 1377 | CA  | THR | B | 107 | 73.939 | 31.155 | 33.091 | 1.00100.61 | C    |      |   |
| ANISOU | 1377 | CA  | THR | B | 107 | 14246  | 13152  | 10828  | -1781      | 164  | -198 | C |
| ATOM   | 1378 | CB  | THR | B | 107 | 74.355 | 30.127 | 32.016 | 1.00105.05 | C    |      |   |
| ANISOU | 1378 | CB  | THR | B | 107 | 14853  | 13706  | 11356  | -1703      | 227  | -75  | C |
| ATOM   | 1379 | OG1 | THR | B | 107 | 73.397 | 30.159 | 30.949 | 1.00108.79 | O    |      |   |
| ANISOU | 1379 | OG1 | THR | B | 107 | 15410  | 14007  | 11917  | -1717      | 237  | -83  | O |
| ATOM   | 1380 | CG2 | THR | B | 107 | 74.345 | 28.714 | 32.583 | 1.00100.72 | C    |      |   |
| ANISOU | 1380 | CG2 | THR | B | 107 | 14339  | 13227  | 10703  | -1591      | 301  | -20  | C |
| ATOM   | 1381 | C   | THR | B | 107 | 74.879 | 31.067 | 34.286 | 1.00106.62 | C    |      |   |
| ANISOU | 1381 | C   | THR | B | 107 | 14924  | 14092  | 11493  | -1764      | 156  | -192 | C |
| ATOM   | 1382 | O   | THR | B | 107 | 74.574 | 30.409 | 35.280 | 1.00110.22 | O    |      |   |
| ANISOU | 1382 | O   | THR | B | 107 | 15394  | 14604  | 11881  | -1713      | 189  | -212 | O |
| ATOM   | 1383 | N   | ALA | B | 108 | 76.021 | 31.742 | 34.181 | 1.00109.07 | N    |      |   |
| ANISOU | 1383 | N   | ALA | B | 108 | 15151  | 14492  | 11800  | -1808      | 110  | -165 | N |
| ATOM   | 1384 | CA  | ALA | B | 108 | 77.032 | 31.743 | 35.235 | 1.00109.08 | C    |      |   |
| ANISOU | 1384 | CA  | ALA | B | 108 | 15066  | 14663  | 11715  | -1796      | 96   | -155 | C |
| ATOM   | 1385 | CB  | ALA | B | 108 | 78.272 | 32.483 | 34.771 | 1.00105.91 | C    |      |   |
| ANISOU | 1385 | CB  | ALA | B | 108 | 14581  | 14334  | 11324  | -1847      | 48   | -111 | C |
| ATOM   | 1386 | C   | ALA | B | 108 | 76.505 | 32.357 | 36.529 | 1.00115.49 | C    |      |   |
| ANISOU | 1386 | C   | ALA | B | 108 | 15848  | 15500  | 12531  | -1841      | 56   | -270 | C |
| ATOM   | 1387 | O   | ALA | B | 108 | 76.649 | 31.767 | 37.605 | 1.00122.43 | O    |      |   |
| ANISOU | 1387 | O   | ALA | B | 108 | 16712  | 16482  | 13323  | -1793      | 81   | -273 | O |
| ATOM   | 1388 | N   | ALA | B | 109 | 75.895 | 33.536 | 36.419 | 1.00112.61 | N    |      |   |
| ANISOU | 1388 | N   | ALA | B | 109 | 15475  | 15042  | 12269  | -1934      | -10  | -366 | N |
| ATOM   | 1389 | CA  | ALA | B | 109 | 75.325 | 34.230 | 37.573 | 1.00122.26 | C    |      |   |
| ANISOU | 1389 | CA  | ALA | B | 109 | 16667  | 16278  | 13509  | -1984      | -55  | -488 | C |
| ATOM   | 1390 | CB  | ALA | B | 109 | 74.611 | 35.501 | 37.129 | 1.00124.86 | C    |      |   |
| ANISOU | 1390 | CB  | ALA | B | 109 | 16997  | 16475  | 13969  | -2084      | -129 | -585 | C |
| ATOM   | 1391 | C   | ALA | B | 109 | 74.367 | 33.318 | 38.320 | 1.00122.38 | C    |      |   |
| ANISOU | 1391 | C   | ALA | B | 109 | 16745  | 16280  | 13474  | -1922      | 4    | -522 | C |
| ATOM   | 1392 | O   | ALA | B | 109 | 74.294 | 33.336 | 39.547 | 1.00129.33 | O    |      |   |
| ANISOU | 1392 | O   | ALA | B | 109 | 17591  | 17246  | 14302  | -1922      | -2   | -581 | O |
| ATOM   | 1393 | N   | LEU | B | 110 | 73.628 | 32.529 | 37.552 | 1.00120.24 | N    |      |   |
| ANISOU | 1393 | N   | LEU | B | 110 | 16566  | 15902  | 13218  | -1873      | 61   | -485 | N |
| ATOM   | 1394 | CA  | LEU | B | 110 | 72.677 | 31.573 | 38.095 | 1.00124.00 | C    |      |   |
| ANISOU | 1394 | CA  | LEU | B | 110 | 17112  | 16352  | 13649  | -1811      | 122  | -505 | C |
| ATOM   | 1395 | CB  | LEU | B | 110 | 71.858 | 30.951 | 36.963 | 1.00118.05 | C    |      |   |
| ANISOU | 1395 | CB  | LEU | B | 110 | 16459  | 15450  | 12943  | -1773      | 170  | -465 | C |
| ATOM   | 1396 | CG  | LEU | B | 110 | 70.881 | 31.890 | 36.252 | 1.00109.58 | C    |      |   |
| ANISOU | 1396 | CG  | LEU | B | 110 | 15423  | 14210  | 12005  | -1849      | 126  | -549 | C |
| ATOM   | 1397 | CD1 | LEU | B | 110 | 70.153 | 31.163 | 35.123 | 1.00116.04 | C    |      |   |
| ANISOU | 1397 | CD1 | LEU | B | 110 | 16342  | 14888  | 12860  | -1801      | 179  | -498 | C |
| ATOM   | 1398 | CD2 | LEU | B | 110 | 69.909 | 32.520 | 37.229 | 1.00107.73 | C    |      |   |
| ANISOU | 1398 | CD2 | LEU | B | 110 | 15181  | 13945  | 11806  | -1901      | 91   | -690 | C |
| ATOM   | 1399 | C   | LEU | B | 110 | 73.393 | 30.481 | 38.892 | 1.00119.49 | C    |      |   |
| ANISOU | 1399 | C   | LEU | B | 110 | 16524  | 15932  | 12944  | -1728      | 172  | -430 | C |
| ATOM   | 1400 | O   | LEU | B | 110 | 72.883 | 29.995 | 39.899 | 1.00121.91 | O    |      |   |
| ANISOU | 1400 | O   | LEU | B | 110 | 16848  | 16280  | 13193  | -1701      | 198  | -471 | O |
| ATOM   | 1401 | N   | ALA | B | 111 | 74.561 | 30.072 | 38.406 | 1.00115.85 | N    |      |   |
| ANISOU | 1401 | N   | ALA | B | 111 | 16033  | 15550  | 12435  | -1687      | 187  | -321 | N |
| ATOM   | 1402 | CA  | ALA | B | 111 | 75.354 | 29.052 | 39.081 | 1.00119.94 | C    |      |   |
| ANISOU | 1402 | CA  | ALA | B | 111 | 16531  | 16210  | 12830  | -1608      | 228  | -244 | C |
| ATOM   | 1403 | CB  | ALA | B | 111 | 76.474 | 28.559 | 38.179 | 1.00122.69 | C    |      |   |
| ANISOU | 1403 | CB  | ALA | B | 111 | 16861  | 16606  | 13148  | -1560      | 248  | -122 | C |
| ATOM   | 1404 | C   | ALA | B | 111 | 75.922 | 29.586 | 40.399 | 1.00130.84 | C    |      |   |
| ANISOU | 1404 | C   | ALA | B | 111 | 17826  | 17728  | 14160  | -1644      | 185  | -298 | C |
| ATOM   | 1405 | O   | ALA | B | 111 | 75.920 | 28.887 | 41.414 | 1.00134.43 | O    |      |   |
| ANISOU | 1405 | O   | ALA | B | 111 | 18283  | 18270  | 14525  | -1599      | 212  | -296 | O |
| ATOM   | 1406 | N   | THR | B | 112 | 76.413 | 30.825 | 40.373 | 1.00130.30 | N    |      |   |



|        |      |     |     |   |     |        |        |        |            |     |       |   |
|--------|------|-----|-----|---|-----|--------|--------|--------|------------|-----|-------|---|
| ANISOU | 1406 | N   | THR | B | 112 | 17683  | 17676  | 14148  | -1726      | 116 | -344  | N |
| ATOM   | 1407 | CA  | THR | B | 112 | 76.977 | 31.459 | 41.563 | 1.00130.32 |     |       | C |
| ANISOU | 1407 | CA  | THR | B | 112 | 17599  | 17802  | 14113  | -1767      | 68  | -399  | C |
| ATOM   | 1408 | CB  | THR | B | 112 | 77.526 | 32.853 | 41.250 | 1.00131.12 |     |       | C |
| ANISOU | 1408 | CB  | THR | B | 112 | 17626  | 17900  | 14294  | -1858      | -12 | -439  | C |
| ATOM   | 1409 | OG1 | THR | B | 112 | 78.436 | 32.765 | 40.152 | 1.00135.53 |     |       | O |
| ANISOU | 1409 | OG1 | THR | B | 112 | 18170  | 18464  | 14862  | -1845      | -8  | -338  | O |
| ATOM   | 1410 | CG2 | THR | B | 112 | 78.232 | 33.442 | 42.460 | 1.00129.96 |     |       | C |
| ANISOU | 1410 | CG2 | THR | B | 112 | 17386  | 17891  | 14102  | -1892      | -60 | -484  | C |
| ATOM   | 1411 | C   | THR | B | 112 | 75.911 | 31.564 | 42.643 | 1.00137.87 |     |       | C |
| ANISOU | 1411 | C   | THR | B | 112 | 18577  | 18744  | 15064  | -1787      | 66  | -510  | C |
| ATOM   | 1412 | O   | THR | B | 112 | 76.133 | 31.181 | 43.786 | 1.00148.12 |     |       | O |
| ANISOU | 1412 | O   | THR | B | 112 | 19849  | 20155  | 16274  | -1763      | 76  | -520  | O |
| ATOM   | 1413 | N   | TRP | B | 113 | 74.742 | 32.057 | 42.247 | 1.00136.84 |     |       | N |
| ANISOU | 1413 | N   | TRP | B | 113 | 18494  | 18471  | 15026  | -1832      | 53  | -591  | N |
| ATOM   | 1414 | CA  | TRP | B | 113 | 73.590 | 32.205 | 43.131 | 1.00139.54 |     |       | C |
| ANISOU | 1414 | CA  | TRP | B | 113 | 18861  | 18781  | 15379  | -1856      | 52  | -706  | C |
| ATOM   | 1415 | CB  | TRP | B | 113 | 72.403 | 32.753 | 42.342 | 1.00143.21 |     |       | C |
| ANISOU | 1415 | CB  | TRP | B | 113 | 19382  | 19068  | 15963  | -1902      | 36  | -779  | C |
| ATOM   | 1416 | CG  | TRP | B | 113 | 71.132 | 32.791 | 43.108 | 1.00143.70 |     |       | C |
| ANISOU | 1416 | CG  | TRP | B | 113 | 19479  | 19082  | 16039  | -1921      | 44  | -894  | C |
| ATOM   | 1417 | CD1 | TRP | B | 113 | 70.975 | 33.108 | 44.421 | 1.00144.02 |     |       | C |
| ANISOU | 1417 | CD1 | TRP | B | 113 | 19472  | 19212  | 16038  | -1949      | 22  | -984  | C |
| ATOM   | 1418 | NE1 | TRP | B | 113 | 69.652 | 33.023 | 44.775 | 1.00145.52 |     |       | N |
| ANISOU | 1418 | NE1 | TRP | B | 113 | 19713  | 19323  | 16254  | -1960      | 40  | -1080 | N |
| ATOM   | 1419 | CE2 | TRP | B | 113 | 68.923 | 32.643 | 43.674 | 1.00140.87 |     |       | C |
| ANISOU | 1419 | CE2 | TRP | B | 113 | 19210  | 18587  | 15727  | -1937      | 73  | -1051 | C |
| ATOM   | 1420 | CD2 | TRP | B | 113 | 69.829 | 32.488 | 42.609 | 1.00141.94 |     |       | C |
| ANISOU | 1420 | CD2 | TRP | B | 113 | 19345  | 18712  | 15872  | -1912      | 76  | -934  | C |
| ATOM   | 1421 | CE3 | TRP | B | 113 | 69.334 | 32.102 | 41.357 | 1.00136.58 |     |       | C |
| ANISOU | 1421 | CE3 | TRP | B | 113 | 18747  | 17895  | 15253  | -1885      | 108 | -883  | C |
| ATOM   | 1422 | CZ3 | TRP | B | 113 | 67.974 | 31.890 | 41.218 | 1.00133.23 |     |       | C |
| ANISOU | 1422 | CZ3 | TRP | B | 113 | 18400  | 17345  | 14878  | -1884      | 134 | -949  | C |
| ATOM   | 1423 | CH2 | TRP | B | 113 | 67.101 | 32.053 | 42.299 | 1.00138.50 |     |       | C |
| ANISOU | 1423 | CH2 | TRP | B | 113 | 19064  | 18026  | 15534  | -1909      | 130 | -1066 | C |
| ATOM   | 1424 | CZ2 | TRP | B | 113 | 67.555 | 32.432 | 43.535 | 1.00140.71 |     |       | C |
| ANISOU | 1424 | CZ2 | TRP | B | 113 | 19265  | 18444  | 15755  | -1937      | 100 | -1119 | C |
| ATOM   | 1425 | C   | TRP | B | 113 | 73.224 | 30.870 | 43.788 | 1.00135.06 |     |       | C |
| ANISOU | 1425 | C   | TRP | B | 113 | 18348  | 18262  | 14706  | -1775      | 125 | -669  | C |
| ATOM   | 1426 | O   | TRP | B | 113 | 73.098 | 30.770 | 45.011 | 1.00139.30 |     |       | O |
| ANISOU | 1426 | O   | TRP | B | 113 | 18860  | 18888  | 15177  | -1778      | 125 | -721  | O |
| ATOM   | 1427 | N   | PHE | B | 114 | 73.048 | 29.851 | 42.953 | 1.00136.27 |     |       | N |
| ANISOU | 1427 | N   | PHE | B | 114 | 18578  | 18355  | 14844  | -1704      | 186 | -578  | N |
| ATOM   | 1428 | CA  | PHE | B | 114 | 72.736 | 28.491 | 43.390 | 1.00136.35 |     |       | C |
| ANISOU | 1428 | CA  | PHE | B | 114 | 18648  | 18400  | 14759  | -1621      | 255 | -525  | C |
| ATOM   | 1429 | CB  | PHE | B | 114 | 72.491 | 27.602 | 42.170 | 1.00133.66 |     |       | C |
| ANISOU | 1429 | CB  | PHE | B | 114 | 18390  | 17958  | 14436  | -1554      | 308 | -432  | C |
| ATOM   | 1430 | CG  | PHE | B | 114 | 71.107 | 27.719 | 41.596 | 1.00130.62 |     |       | C |
| ANISOU | 1430 | CG  | PHE | B | 114 | 18085  | 17407  | 14139  | -1573      | 323 | -494  | C |
| ATOM   | 1431 | CD1 | PHE | B | 114 | 70.195 | 28.623 | 42.111 | 1.00132.40 |     |       | C |
| ANISOU | 1431 | CD1 | PHE | B | 114 | 18301  | 17578  | 14426  | -1648      | 286 | -628  | C |
| ATOM   | 1432 | CE1 | PHE | B | 114 | 68.921 | 28.720 | 41.580 | 1.00135.40 |     |       | C |
| ANISOU | 1432 | CE1 | PHE | B | 114 | 18754  | 17803  | 14889  | -1664      | 298 | -688  | C |
| ATOM   | 1433 | CZ  | PHE | B | 114 | 68.562 | 27.949 | 40.494 | 1.00133.27 |     |       | C |
| ANISOU | 1433 | CZ  | PHE | B | 114 | 18567  | 17428  | 14643  | -1607      | 347 | -612  | C |
| ATOM   | 1434 | CE2 | PHE | B | 114 | 69.468 | 27.065 | 39.951 | 1.00133.20 |     |       | C |
| ANISOU | 1434 | CE2 | PHE | B | 114 | 18566  | 17471  | 14572  | -1533      | 383 | -478  | C |
| ATOM   | 1435 | CD2 | PHE | B | 114 | 70.739 | 26.962 | 40.495 | 1.00133.92 |     |       | C |
| ANISOU | 1435 | CD2 | PHE | B | 114 | 18583  | 17720  | 14581  | -1516      | 370 | -421  | C |
| ATOM   | 1436 | C   | PHE | B | 114 | 73.835 | 27.907 | 44.270 | 1.00129.19 |     |       | C |
| ANISOU | 1436 | C   | PHE | B | 114 | 17689  | 17664  | 13732  | -1576      | 263 | -459  | C |
| ATOM   | 1437 | O   | PHE | B | 114 | 73.571 | 27.036 | 45.104 | 1.00122.81 |     |       | O |
| ANISOU | 1437 | O   | PHE | B | 114 | 16910  | 16916  | 12837  | -1531      | 300 | -449  | O |

|        |      |     |     |   |     |        |        |        |            |     |      |   |
|--------|------|-----|-----|---|-----|--------|--------|--------|------------|-----|------|---|
| ATOM   | 1438 | N   | VAL | B | 115 | 75.067 | 28.360 | 44.053 | 1.00129.83 |     | N    |   |
| ANISOU | 1438 | N   | VAL | B | 115 | 17696  | 17823  | 13810  | -1589      | 227 | -412 | N |
| ATOM   | 1439 | CA  | VAL | B | 115 | 76.199 | 27.917 | 44.860 | 1.00136.67 |     | C    |   |
| ANISOU | 1439 | CA  | VAL | B | 115 | 18506  | 18852  | 14571  | -1553      | 227 | -353 | C |
| ATOM   | 1440 | CB  | VAL | B | 115 | 77.548 | 28.154 | 44.142 | 1.00131.60 |     | C    |   |
| ANISOU | 1440 | CB  | VAL | B | 115 | 17804  | 18264  | 13935  | -1546      | 205 | -269 | C |
| ATOM   | 1441 | CG1 | VAL | B | 115 | 78.692 | 28.239 | 45.141 | 1.00135.95 |     | C    |   |
| ANISOU | 1441 | CG1 | VAL | B | 115 | 18270  | 18981  | 14404  | -1545      | 177 | -252 | C |
| ATOM   | 1442 | CG2 | VAL | B | 115 | 77.808 | 27.049 | 43.136 | 1.00121.98 |     | C    |   |
| ANISOU | 1442 | CG2 | VAL | B | 115 | 16641  | 17013  | 12693  | -1461      | 260 | -151 | C |
| ATOM   | 1443 | C   | VAL | B | 115 | 76.185 | 28.629 | 46.216 | 1.00140.36 |     | C    |   |
| ANISOU | 1443 | C   | VAL | B | 115 | 18909  | 19409  | 15011  | -1611      | 183 | -452 | C |
| ATOM   | 1444 | O   | VAL | B | 115 | 76.383 | 27.995 | 47.260 | 1.00140.55 |     | O    |   |
| ANISOU | 1444 | O   | VAL | B | 115 | 18926  | 19540  | 14936  | -1578      | 201 | -440 | O |
| ATOM   | 1445 | N   | GLY | B | 116 | 75.947 | 29.938 | 46.199 | 1.00138.36 |     | N    |   |
| ANISOU | 1445 | N   | GLY | B | 116 | 18611  | 19113  | 14847  | -1698      | 125 | -549 | N |
| ATOM   | 1446 | CA  | GLY | B | 116 | 75.881 | 30.719 | 47.422 | 1.00134.85 |     | C    |   |
| ANISOU | 1446 | CA  | GLY | B | 116 | 18104  | 18745  | 14389  | -1759      | 78  | -653 | C |
| ATOM   | 1447 | C   | GLY | B | 116 | 74.852 | 30.171 | 48.396 | 1.00141.46 |     | C    |   |
| ANISOU | 1447 | C   | GLY | B | 116 | 18987  | 19588  | 15173  | -1747      | 112 | -716 | C |
| ATOM   | 1448 | O   | GLY | B | 116 | 75.174 | 29.798 | 49.525 | 1.00150.90 |     | O    |   |
| ANISOU | 1448 | O   | GLY | B | 116 | 20155  | 20907  | 16273  | -1732      | 118 | -717 | O |
| ATOM   | 1449 | N   | ARG | B | 117 | 73.616 | 30.048 | 47.956 | 1.00140.81 |     | N    |   |
| ANISOU | 1449 | N   | ARG | B | 117 | 18978  | 19376  | 15147  | -1752      | 138 | -763 | N |
| ATOM   | 1450 | CA  | ARG | B | 117 | 72.592 | 29.540 | 48.846 | 1.00138.31 |     | C    |   |
| ANISOU | 1450 | CA  | ARG | B | 117 | 18705  | 19063  | 14782  | -1745      | 172 | -826 | C |
| ATOM   | 1451 | CB  | ARG | B | 117 | 71.222 | 29.598 | 48.179 | 1.00126.82 |     | C    |   |
| ANISOU | 1451 | CB  | ARG | B | 117 | 17327  | 17445  | 13414  | -1759      | 192 | -886 | C |
| ATOM   | 1452 | C   | ARG | B | 117 | 72.877 | 28.129 | 49.363 | 1.00143.32 |     | C    |   |
| ANISOU | 1452 | C   | ARG | B | 117 | 19379  | 19788  | 15289  | -1662      | 231 | -731 | C |
| ATOM   | 1453 | O   | ARG | B | 117 | 72.612 | 27.849 | 50.514 | 1.00159.32 |     | O    |   |
| ANISOU | 1453 | O   | ARG | B | 117 | 21399  | 21896  | 17239  | -1667      | 240 | -772 | O |
| ATOM   | 1454 | N   | GLU | B | 118 | 73.397 | 27.239 | 48.534 | 1.00141.13 |     | N    |   |
| ANISOU | 1454 | N   | GLU | B | 118 | 19140  | 19496  | 14987  | -1589      | 268 | -606 | N |
| ATOM   | 1455 | CA  | GLU | B | 118 | 73.660 | 25.883 | 48.994 | 1.00141.95 |     | C    |   |
| ANISOU | 1455 | CA  | GLU | B | 118 | 19282  | 19679  | 14975  | -1510      | 317 | -514 | C |
| ATOM   | 1456 | CB  | GLU | B | 118 | 74.048 | 24.961 | 47.852 | 1.00146.19 |     | C    |   |
| ANISOU | 1456 | CB  | GLU | B | 118 | 19870  | 20166  | 15509  | -1430      | 357 | -387 | C |
| ATOM   | 1457 | CG  | GLU | B | 118 | 74.368 | 23.546 | 48.312 | 1.00140.90 |     | C    |   |
| ANISOU | 1457 | CG  | GLU | B | 118 | 19237  | 19577  | 14721  | -1345      | 400 | -291 | C |
| ATOM   | 1458 | CD  | GLU | B | 118 | 73.164 | 22.842 | 48.888 | 1.00141.98 |     | C    |   |
| ANISOU | 1458 | CD  | GLU | B | 118 | 19449  | 19679  | 14819  | -1331      | 440 | -326 | C |
| ATOM   | 1459 | OE1 | GLU | B | 118 | 72.361 | 23.506 | 49.561 | 1.00149.72 |     | O    |   |
| ANISOU | 1459 | OE1 | GLU | B | 118 | 20420  | 20646  | 15821  | -1397      | 425 | -440 | O |
| ATOM   | 1460 | OE2 | GLU | B | 118 | 73.026 | 21.626 | 48.675 | 1.00137.18 |     | O    |   |
| ANISOU | 1460 | OE2 | GLU | B | 118 | 18907  | 19059  | 14157  | -1255      | 484 | -241 | O |
| ATOM   | 1461 | C   | GLU | B | 118 | 74.686 | 25.757 | 50.089 | 1.00150.86 |     | C    |   |
| ANISOU | 1461 | C   | GLU | B | 118 | 20343  | 20975  | 16003  | -1504      | 296 | -490 | C |
| ATOM   | 1462 | O   | GLU | B | 118 | 74.535 | 24.927 | 50.958 | 1.00158.50 |     | O    |   |
| ANISOU | 1462 | O   | GLU | B | 118 | 21335  | 22014  | 16876  | -1472      | 323 | -472 | O |
| ATOM   | 1463 | N   | GLN | B | 119 | 75.731 | 26.563 | 50.012 | 1.00155.63 |     | N    |   |
| ANISOU | 1463 | N   | GLN | B | 119 | 20864  | 21638  | 16630  | -1535      | 248 | -484 | N |
| ATOM   | 1464 | CA  | GLN | B | 119 | 76.820 | 26.510 | 50.974 | 1.00159.61 |     | C    |   |
| ANISOU | 1464 | CA  | GLN | B | 119 | 21299  | 22301  | 17047  | -1529      | 223 | -456 | C |
| ATOM   | 1465 | CB  | GLN | B | 119 | 77.977 | 27.405 | 50.530 | 1.00159.33 |     | C    |   |
| ANISOU | 1465 | CB  | GLN | B | 119 | 21179  | 22303  | 17057  | -1558      | 173 | -437 | C |
| ATOM   | 1466 | CG  | GLN | B | 119 | 78.901 | 26.819 | 49.479 | 1.00166.07 |     | C    |   |
| ANISOU | 1466 | CG  | GLN | B | 119 | 22038  | 23154  | 17907  | -1494      | 192 | -311 | C |
| ATOM   | 1467 | CD  | GLN | B | 119 | 80.096 | 26.110 | 50.069 | 1.00164.26 |     | C    |   |
| ANISOU | 1467 | CD  | GLN | B | 119 | 21770  | 23068  | 17573  | -1440      | 193 | -226 | C |
| ATOM   | 1468 | OE1 | GLN | B | 119 | 81.196 | 26.651 | 50.099 | 1.00163.05 |     | O    |   |
| ANISOU | 1468 | OE1 | GLN | B | 119 | 21539  | 22992  | 17420  | -1457      | 155 | -205 | O |
| ATOM   | 1469 | NE2 | GLN | B | 119 | 79.887 | 24.890 | 50.532 | 1.00158.14 |     | N    |   |

|        |      |     |     |       |     |        |        |        |            |       |      |   |
|--------|------|-----|-----|-------|-----|--------|--------|--------|------------|-------|------|---|
| ANISOU | 1469 | NE2 | GLN | B     | 119 | 21049  | 22326  | 16709  | -1375      | 236   | -174 | N |
| ATOM   | 1470 | C   | GLN | B     | 119 | 76.426 | 26.909 | 52.373 | 1.00166.44 |       |      | C |
| ANISOU | 1470 | C   | GLN | B     | 119 | 22130  | 23242  | 17866  | -1581      | 202   | -557 | C |
| ATOM   | 1471 | O   | GLN | B     | 119 | 77.033 | 26.459 | 53.333 | 1.00174.06 |       |      | O |
| ANISOU | 1471 | O   | GLN | B     | 119 | 23067  | 24334  | 18733  | -1561      | 200   | -528 | O |
| ATOM   | 1472 | N   | GLU | B     | 120 | 75.414 | 27.749 | 52.503 | 1.00162.34 |       |      | N |
| ANISOU | 1472 | N   | GLU | B     | 120 | 21613  | 22650  | 17418  | -1648      | 184   | -678 | N |
| ATOM   | 1473 | CA  | GLU | B     | 120 | 75.017 | 28.186 | 53.826 | 1.00158.56 |       |      | C |
| ANISOU | 1473 | CA  | GLU | B     | 120 | 21098  | 22247  | 16900  | -1701      | 162   | -784 | C |
| ATOM   | 1474 | CB  | GLU | B     | 120 | 73.853 | 29.169 | 53.751 | 1.00147.12 |       |      | C |
| ANISOU | 1474 | CB  | GLU | B     | 120 | 19653  | 20696  | 15551  | -1774      | 139   | -922 | C |
| ATOM   | 1475 | C   | GLU | B     | 120 | 74.630 | 26.957 | 54.615 | 1.00164.39 |       |      | C |
| ANISOU | 1475 | C   | GLU | B     | 120 | 21893  | 23044  | 17525  | -1654      | 213   | -748 | C |
| ATOM   | 1476 | O   | GLU | B     | 120 | 74.995 | 26.820 | 55.765 | 1.00170.83 |       |      | O |
| ANISOU | 1476 | O   | GLU | B     | 120 | 22673  | 23984  | 18253  | -1662      | 202   | -760 | O |
| ATOM   | 1477 | N   | ARG | B     | 121 | 73.924 | 26.038 | 53.984 | 1.00163.10 |       |      | N |
| ANISOU | 1477 | N   | ARG | B     | 121 | 21819  | 22790  | 17360  | -1603      | 266   | -698 | N |
| ATOM   | 1478 | CA  | ARG | B     | 121 | 73.523 | 24.832 | 54.667 | 1.00162.70 |       |      | C |
| ANISOU | 1478 | CA  | ARG | B     | 121 | 21828  | 22787  | 17204  | -1558      | 313   | -658 | C |
| ATOM   | 1479 | CB  | ARG | B     | 121 | 72.324 | 24.206 | 53.966 | 1.00160.73 |       |      | C |
| ANISOU | 1479 | CB  | ARG | B     | 121 | 21677  | 22404  | 16991  | -1530      | 364   | -655 | C |
| ATOM   | 1480 | C   | ARG | B     | 121 | 74.699 | 23.896 | 54.607 | 1.00165.94 |       |      | C |
| ANISOU | 1480 | C   | ARG | B     | 121 | 22235  | 23282  | 17532  | -1484      | 323   | -521 | C |
| ATOM   | 1481 | O   | ARG | B     | 121 | 74.709 | 22.943 | 53.845 | 1.00168.71 |       |      | O |
| ANISOU | 1481 | O   | ARG | B     | 121 | 22647  | 23580  | 17873  | -1413      | 360   | -424 | O |
| ATOM   | 1482 | N   | ARG | B     | 122 | 75.701 | 24.186 | 55.422 | 1.00167.21 |       |      | N |
| ANISOU | 1482 | N   | ARG | B     | 122 | 22321  | 23575  | 17637  | -1499      | 285   | -515 | N |
| ATOM   | 1483 | CA  | ARG | B     | 122 | 76.899 | 23.373 | 55.475 | 1.00168.78 |       |      | C |
| ANISOU | 1483 | CA  | ARG | B     | 122 | 22505  | 23866  | 17757  | -1433      | 287   | -394 | C |
| ATOM   | 1484 | CB  | ARG | B     | 122 | 77.529 | 23.277 | 54.092 | 1.00168.77 |       |      | C |
| ANISOU | 1484 | CB  | ARG | B     | 122 | 22509  | 23797  | 17820  | -1386      | 292   | -307 | C |
| ATOM   | 1485 | C   | ARG | B     | 122 | 77.898 | 23.949 | 56.467 | 1.00169.92 |       |      | C |
| ANISOU | 1485 | C   | ARG | B     | 122 | 22559  | 24151  | 17853  | -1468      | 238   | -416 | C |
| ATOM   | 1486 | O   | ARG | B     | 122 | 79.058 | 24.177 | 56.133 | 1.00170.45 |       |      | O |
| ANISOU | 1486 | O   | ARG | B     | 122 | 22571  | 24265  | 17929  | -1451      | 211   | -359 | O |
| TER    |      |     |     |       |     |        |        |        |            |       |      |   |
| HETATM | 1487 | O   | HOH | B1001 |     | 68.169 | 33.052 | 9.613  | 1.00       | 73.06 |      | O |
| HETATM | 1488 | O   | HOH | B1002 |     | 75.913 | 29.049 | 26.317 | 1.00       | 74.07 |      | O |
| HETATM | 1489 | O   | HOH | B1003 |     | 72.600 | 28.859 | 23.633 | 1.00       | 71.68 |      | O |
| TER    |      |     |     |       |     |        |        |        |            |       |      |   |
| ATOM   | 1490 | N   | SER | D     | 22  | 98.186 | 33.584 | 36.217 | 1.00162.89 |       |      | N |
| ANISOU | 1490 | N   | SER | D     | 22  | 15314  | 25600  | 20978  | -3639      | -41   | 1639 | N |
| ATOM   | 1491 | CA  | SER | D     | 22  | 97.044 | 33.204 | 35.398 | 1.00150.80 |       |      | C |
| ANISOU | 1491 | CA  | SER | D     | 22  | 13873  | 24043  | 19382  | -3614      | -60   | 1479 | C |
| ATOM   | 1492 | CB  | SER | D     | 22  | 97.451 | 33.129 | 33.920 | 1.00144.50 |       |      | C |
| ANISOU | 1492 | CB  | SER | D     | 22  | 13029  | 23243  | 18630  | -3521      | 10    | 1612 | C |
| ATOM   | 1493 | C   | SER | D     | 22  | 96.445 | 31.873 | 35.857 | 1.00146.00 |       |      | C |
| ANISOU | 1493 | C   | SER | D     | 22  | 13374  | 23476  | 18623  | -3628      | -84   | 1354 | C |
| ATOM   | 1494 | O   | SER | D     | 22  | 97.047 | 30.810 | 35.677 | 1.00145.40 |       |      | O |
| ANISOU | 1494 | O   | SER | D     | 22  | 13299  | 23457  | 18491  | -3586      | -41   | 1459 | O |
| ATOM   | 1495 | N   | ALA | D     | 23  | 95.254 | 31.951 | 36.450 | 1.00133.21 |       |      | N |
| ANISOU | 1495 | N   | ALA | D     | 23  | 11847  | 21830  | 16936  | -3683      | -149  | 1132 | N |
| ATOM   | 1496 | CA  | ALA | D     | 23  | 94.525 | 30.780 | 36.935 | 1.00127.52 |       |      | C |
| ANISOU | 1496 | CA  | ALA | D     | 23  | 11239  | 21144  | 16067  | -3701      | -172  | 987  | C |
| ATOM   | 1497 | CB  | ALA | D     | 23  | 93.275 | 31.202 | 37.662 | 1.00125.89 |       |      | C |
| ANISOU | 1497 | CB  | ALA | D     | 23  | 11118  | 20903  | 15810  | -3761      | -234  | 758  | C |
| ATOM   | 1498 | C   | ALA | D     | 23  | 94.183 | 29.832 | 35.794 | 1.00134.96 |       |      | C |
| ANISOU | 1498 | C   | ALA | D     | 23  | 12233  | 22097  | 16946  | -3633      | -145  | 966  | C |
| ATOM   | 1499 | O   | ALA | D     | 23  | 94.089 | 30.252 | 34.639 | 1.00142.30 |       |      | O |
| ANISOU | 1499 | O   | ALA | D     | 23  | 13135  | 22992  | 17940  | -3580      | -125  | 995  | O |
| ATOM   | 1500 | N   | LEU | D     | 24  | 93.972 | 28.565 | 36.134 | 1.00126.65 |       |      | N |
| ANISOU | 1500 | N   | LEU | D     | 24  | 11257  | 21094  | 15769  | -3633      | -144  | 910  | N |
| ATOM   | 1501 | CA  | LEU | D     | 24  | 93.711 | 27.515 | 35.158 | 1.00121.73 |       |      | C |

|        |      |     |     |   |    |        |        |        |            |      |      |   |
|--------|------|-----|-----|---|----|--------|--------|--------|------------|------|------|---|
| ANISOU | 1501 | CA  | LEU | D | 24 | 10683  | 20490  | 15077  | -3567      | -117 | 895  | C |
| ATOM   | 1502 | CB  | LEU | D | 24 | 93.417 | 26.205 | 35.890 | 1.00110.34 |      |      | C |
| ANISOU | 1502 | CB  | LEU | D | 24 | 9331   | 19102  | 13492  | -3590      | -127 | 810  | C |
| ATOM   | 1503 | CG  | LEU | D | 24 | 93.386 | 24.951 | 35.025 | 1.00107.68 |      |      | C |
| ANISOU | 1503 | CG  | LEU | D | 24 | 9034   | 18799  | 13081  | -3521      | -95  | 827  | C |
| ATOM   | 1504 | CD1 | LEU | D | 24 | 94.812 | 24.677 | 34.587 | 1.00112.97 |      |      | C |
| ANISOU | 1504 | CD1 | LEU | D | 24 | 9602   | 19513  | 13809  | -3462      | -33  | 1088 | C |
| ATOM   | 1505 | CD2 | LEU | D | 24 | 92.798 | 23.771 | 35.756 | 1.00114.54 |      |      | C |
| ANISOU | 1505 | CD2 | LEU | D | 24 | 10009  | 19709  | 13805  | -3552      | -113 | 691  | C |
| ATOM   | 1506 | C   | LEU | D | 24 | 92.547 | 27.860 | 34.201 | 1.00128.08 |      |      | C |
| ANISOU | 1506 | C   | LEU | D | 24 | 11546  | 21236  | 15883  | -3540      | -141 | 733  | C |
| ATOM   | 1507 | O   | LEU | D | 24 | 92.692 | 27.773 | 32.974 | 1.00128.67 |      |      | O |
| ANISOU | 1507 | O   | LEU | D | 24 | 11592  | 21301  | 15997  | -3466      | -107 | 801  | O |
| ATOM   | 1508 | N   | HIS | D | 25 | 91.400 | 28.255 | 34.722 | 1.00129.31 |      |      | N |
| ANISOU | 1508 | N   | HIS | D | 25 | 11782  | 21354  | 15997  | -3592      | -195 | 522  | N |
| ATOM   | 1509 | CA  | HIS | D | 25 | 90.304 | 28.515 | 33.815 | 1.00124.25 |      |      | C |
| ANISOU | 1509 | CA  | HIS | D | 25 | 11200  | 20658  | 15351  | -3561      | -218 | 367  | C |
| ATOM   | 1510 | CB  | HIS | D | 25 | 89.036 | 28.838 | 34.579 | 1.00125.88 |      |      | C |
| ANISOU | 1510 | CB  | HIS | D | 25 | 11504  | 20831  | 15493  | -3617      | -268 | 131  | C |
| ATOM   | 1511 | CG  | HIS | D | 25 | 89.247 | 29.772 | 35.715 | 1.00133.19 |      |      | C |
| ANISOU | 1511 | CG  | HIS | D | 25 | 12391  | 21749  | 16466  | -3687      | -292 | 144  | C |
| ATOM   | 1512 | ND1 | HIS | D | 25 | 90.127 | 29.508 | 36.736 | 1.00131.01 |      |      | N |
| ANISOU | 1512 | ND1 | HIS | D | 25 | 12071  | 21524  | 16181  | -3726      | -278 | 258  | N |
| ATOM   | 1513 | CE1 | HIS | D | 25 | 90.101 | 30.504 | 37.600 | 1.00131.05 |      |      | C |
| ANISOU | 1513 | CE1 | HIS | D | 25 | 12045  | 21508  | 16238  | -3780      | -306 | 238  | C |
| ATOM   | 1514 | NE2 | HIS | D | 25 | 89.232 | 31.400 | 37.178 | 1.00131.34 |      |      | N |
| ANISOU | 1514 | NE2 | HIS | D | 25 | 12106  | 21482  | 16315  | -3779      | -337 | 116  | N |
| ATOM   | 1515 | CD2 | HIS | D | 25 | 88.684 | 30.964 | 36.001 | 1.00136.27 |      |      | C |
| ANISOU | 1515 | CD2 | HIS | D | 25 | 12779  | 22087  | 16913  | -3722      | -329 | 54   | C |
| ATOM   | 1516 | C   | HIS | D | 25 | 90.646 | 29.598 | 32.818 | 1.00125.82 |      |      | C |
| ANISOU | 1516 | C   | HIS | D | 25 | 11311  | 20809  | 15686  | -3521      | -206 | 465  | C |
| ATOM   | 1517 | O   | HIS | D | 25 | 90.364 | 29.446 | 31.641 | 1.00127.76 |      |      | O |
| ANISOU | 1517 | O   | HIS | D | 25 | 11564  | 21034  | 15943  | -3455      | -192 | 453  | O |
| ATOM   | 1518 | N   | TRP | D | 26 | 91.283 | 30.667 | 33.258 | 1.00124.57 |      |      | N |
| ANISOU | 1518 | N   | TRP | D | 26 | 11066  | 20633  | 15631  | -3556      | -208 | 568  | N |
| ATOM   | 1519 | CA  | TRP | D | 26 | 91.654 | 31.709 | 32.327 | 1.00123.67 |      |      | C |
| ANISOU | 1519 | CA  | TRP | D | 26 | 10863  | 20475  | 15649  | -3518      | -188 | 669  | C |
| ATOM   | 1520 | CB  | TRP | D | 26 | 92.246 | 32.904 | 33.040 | 1.00133.19 |      |      | C |
| ANISOU | 1520 | CB  | TRP | D | 26 | 11984  | 21661  | 16961  | -3570      | -199 | 753  | C |
| ATOM   | 1521 | CG  | TRP | D | 26 | 91.276 | 33.687 | 33.865 | 1.00136.78 |      |      | C |
| ANISOU | 1521 | CG  | TRP | D | 26 | 12494  | 22071  | 17406  | -3639      | -269 | 567  | C |
| ATOM   | 1522 | CD1 | TRP | D | 26 | 91.442 | 34.082 | 35.148 | 1.00144.46 |      |      | C |
| ANISOU | 1522 | CD1 | TRP | D | 26 | 13454  | 23054  | 18381  | -3708      | -294 | 557  | C |
| ATOM   | 1523 | NE1 | TRP | D | 26 | 90.360 | 34.800 | 35.572 | 1.00144.81 |      |      | N |
| ANISOU | 1523 | NE1 | TRP | D | 26 | 13557  | 23050  | 18413  | -3749      | -351 | 371  | N |
| ATOM   | 1524 | CE2 | TRP | D | 26 | 89.460 | 34.873 | 34.549 | 1.00139.34 |      |      | C |
| ANISOU | 1524 | CE2 | TRP | D | 26 | 12921  | 22314  | 17707  | -3708      | -367 | 254  | C |
| ATOM   | 1525 | CD2 | TRP | D | 26 | 90.008 | 34.189 | 33.457 | 1.00134.19 |      |      | C |
| ANISOU | 1525 | CD2 | TRP | D | 26 | 12239  | 21683  | 17063  | -3639      | -318 | 371  | C |
| ATOM   | 1526 | CE3 | TRP | D | 26 | 89.280 | 34.122 | 32.280 | 1.00133.33 |      |      | C |
| ANISOU | 1526 | CE3 | TRP | D | 26 | 12175  | 21538  | 16947  | -3584      | -324 | 283  | C |
| ATOM   | 1527 | CZ3 | TRP | D | 26 | 88.053 | 34.731 | 32.234 | 1.00141.92 |      |      | C |
| ANISOU | 1527 | CZ3 | TRP | D | 26 | 13336  | 22569  | 18016  | -3600      | -380 | 82   | C |
| ATOM   | 1528 | CH2 | TRP | D | 26 | 87.537 | 35.406 | 33.333 | 1.00136.63 |      |      | C |
| ANISOU | 1528 | CH2 | TRP | D | 26 | 12696  | 21880  | 17337  | -3667      | -423 | -26  | C |
| ATOM   | 1529 | CZ2 | TRP | D | 26 | 88.222 | 35.486 | 34.498 | 1.00137.51 |      |      | C |
| ANISOU | 1529 | CZ2 | TRP | D | 26 | 12762  | 22028  | 17458  | -3721      | -417 | 58   | C |
| ATOM   | 1530 | C   | TRP | D | 26 | 92.627 | 31.116 | 31.306 | 1.00128.48 |      |      | C |
| ANISOU | 1530 | C   | TRP | D | 26 | 11403  | 21123  | 16289  | -3432      | -110 | 871  | C |
| ATOM   | 1531 | O   | TRP | D | 26 | 92.592 | 31.465 | 30.145 | 1.00130.84 |      |      | O |
| ANISOU | 1531 | O   | TRP | D | 26 | 11669  | 21395  | 16649  | -3368      | -82  | 910  | O |
| ATOM   | 1532 | N   | ARG | D | 27 | 93.518 | 30.238 | 31.742 | 1.00130.99 |      |      | N |
| ANISOU | 1532 | N   | ARG | D | 27 | 11699  | 21507  | 16565  | -3424      | -69  | 1006 | N |

|        |      |     |     |   |    |         |        |        |            |      |      |   |
|--------|------|-----|-----|---|----|---------|--------|--------|------------|------|------|---|
| ATOM   | 1533 | CA  | ARG | D | 27 | 94.453  | 29.598 | 30.821 | 1.00129.71 |      |      | C |
| ANISOU | 1533 | CA  | ARG | D | 27 | 11477   | 21389  | 16419  | -3333      | 15   | 1205 | C |
| ATOM   | 1534 | CB  | ARG | D | 27 | 95.498  | 28.781 | 31.579 | 1.00139.73 |      |      | C |
| ANISOU | 1534 | CB  | ARG | D | 27 | 12717   | 22729  | 17646  | -3340      | 49   | 1355 | C |
| ATOM   | 1535 | CG  | ARG | D | 27 | 96.519  | 29.597 | 32.361 | 1.00147.35 |      |      | C |
| ANISOU | 1535 | CG  | ARG | D | 27 | 13587   | 23699  | 18699  | -3380      | 61   | 1505 | C |
| ATOM   | 1536 | CD  | ARG | D | 27 | 97.706  | 28.758 | 32.825 | 1.00155.23 |      |      | C |
| ANISOU | 1536 | CD  | ARG | D | 27 | 14544   | 24770  | 19667  | -3360      | 110  | 1691 | C |
| ATOM   | 1537 | NE  | ARG | D | 27 | 98.611  | 28.449 | 31.721 | 1.00169.25 |      |      | N |
| ANISOU | 1537 | NE  | ARG | D | 27 | 16254   | 26576  | 21479  | -3253      | 203  | 1904 | N |
| ATOM   | 1538 | CZ  | ARG | D | 27 | 99.834  | 27.948 | 31.861 | 1.00174.08 |      |      | C |
| ANISOU | 1538 | CZ  | ARG | D | 27 | 16807   | 27244  | 22093  | -3210      | 263  | 2116 | C |
| ATOM   | 1539 | NH1 | ARG | D | 27 | 100.325 | 27.698 | 33.069 | 1.00171.26 |      |      | N |
| ANISOU | 1539 | NH1 | ARG | D | 27 | 16444   | 26920  | 21709  | -3270      | 235  | 2140 | N |
| ATOM   | 1540 | NH2 | ARG | D | 27 | 100.568 | 27.709 | 30.784 | 1.00177.40 |      |      | N |
| ANISOU | 1540 | NH2 | ARG | D | 27 | 17175   | 27690  | 22541  | -3099      | 355  | 2306 | N |
| ATOM   | 1541 | C   | ARG | D | 27 | 93.769  | 28.681 | 29.820 | 1.00123.18 |      |      | C |
| ANISOU | 1541 | C   | ARG | D | 27 | 10718   | 20567  | 15518  | -3264      | 25   | 1119 | C |
| ATOM   | 1542 | O   | ARG | D | 27 | 94.106  | 28.661 | 28.656 | 1.00126.48 |      |      | O |
| ANISOU | 1542 | O   | ARG | D | 27 | 11088   | 20988  | 15980  | -3174      | 88   | 1229 | O |
| ATOM   | 1543 | N   | ALA | D | 28 | 92.804  | 27.916 | 30.294 | 1.00122.02 |      |      | N |
| ANISOU | 1543 | N   | ALA | D | 28 | 10683   | 20424  | 15254  | -3300      | -30  | 922  | N |
| ATOM   | 1544 | CA  | ALA | D | 28 | 92.058  | 26.951 | 29.494 | 1.00120.61 |      |      | C |
| ANISOU | 1544 | CA  | ALA | D | 28 | 10582   | 20252  | 14991  | -3242      | -31  | 812  | C |
| ATOM   | 1545 | CB  | ALA | D | 28 | 91.263  | 26.031 | 30.395 | 1.00119.08 |      |      | C |
| ANISOU | 1545 | CB  | ALA | D | 28 | 10505   | 20078  | 14661  | -3298      | -80  | 629  | C |
| ATOM   | 1546 | C   | ALA | D | 28 | 91.144  | 27.666 | 28.479 | 1.00107.31 |      |      | C |
| ANISOU | 1546 | C   | ALA | D | 28 | 8916    | 18502  | 13355  | -3206      | -56  | 688  | C |
| ATOM   | 1547 | O   | ALA | D | 28 | 90.916  | 27.161 | 27.371 | 1.00100.54 |      |      | O |
| ANISOU | 1547 | O   | ALA | D | 28 | 8070    | 17648  | 12484  | -3120      | -28  | 684  | O |
| ATOM   | 1548 | N   | ALA | D | 29 | 90.604  | 28.820 | 28.883 | 1.00106.93 |      |      | N |
| ANISOU | 1548 | N   | ALA | D | 29 | 8875    | 18395  | 13359  | -3268      | -109 | 584  | N |
| ATOM   | 1549 | CA  | ALA | D | 29 | 89.758  | 29.634 | 28.013 | 1.00095.62 |      |      | C |
| ANISOU | 1549 | CA  | ALA | D | 29 | 7458    | 16895  | 11978  | -3240      | -141 | 466  | C |
| ATOM   | 1550 | CB  | ALA | D | 29 | 89.265  | 30.871 | 28.739 | 1.00090.26 |      |      | C |
| ANISOU | 1550 | CB  | ALA | D | 29 | 6788    | 16161  | 11348  | -3320      | -202 | 363  | C |
| ATOM   | 1551 | C   | ALA | D | 29 | 90.522  | 30.030 | 26.767 | 1.00102.00 |      |      | C |
| ANISOU | 1551 | C   | ALA | D | 29 | 8161    | 17703  | 12893  | -3149      | -70  | 652  | C |
| ATOM   | 1552 | O   | ALA | D | 29 | 90.090  | 29.756 | 25.649 | 1.00111.84 |      |      | O |
| ANISOU | 1552 | O   | ALA | D | 29 | 9423    | 18939  | 14134  | -3069      | -56  | 611  | O |
| ATOM   | 1553 | N   | GLY | D | 30 | 91.663  | 30.675 | 26.969 | 1.00099.09 |      |      | N |
| ANISOU | 1553 | N   | GLY | D | 30 | 7683    | 17349  | 12618  | -3156      | -17  | 859  | N |
| ATOM   | 1554 | CA  | GLY | D | 30 | 92.510  | 31.071 | 25.869 | 1.00104.02 |      |      | C |
| ANISOU | 1554 | CA  | GLY | D | 30 | 8203    | 17981  | 13340  | -3065      | 76   | 1062 | C |
| ATOM   | 1555 | C   | GLY | D | 30 | 92.906  | 29.861 | 25.043 | 1.00106.54 |      |      | C |
| ANISOU | 1555 | C   | GLY | D | 30 | 8521    | 18359  | 13600  | -2958      | 156  | 1166 | C |
| ATOM   | 1556 | O   | GLY | D | 30 | 92.984  | 29.934 | 23.812 | 1.00106.28 |      |      | O |
| ANISOU | 1556 | O   | GLY | D | 30 | 8451    | 18325  | 13607  | -2854      | 222  | 1236 | O |
| ATOM   | 1557 | N   | ALA | D | 31 | 93.152  | 28.745 | 25.722 | 1.00107.83 |      |      | N |
| ANISOU | 1557 | N   | ALA | D | 31 | 8727    | 18577  | 13668  | -2978      | 154  | 1178 | N |
| ATOM   | 1558 | CA  | ALA | D | 31 | 93.531  | 27.517 | 25.041 | 1.00104.00 |      |      | C |
| ANISOU | 1558 | CA  | ALA | D | 31 | 8246    | 18152  | 13118  | -2878      | 226  | 1276 | C |
| ATOM   | 1559 | CB  | ALA | D | 31 | 93.856  | 26.432 | 26.050 | 1.00103.93 |      |      | C |
| ANISOU | 1559 | CB  | ALA | D | 31 | 8279    | 18199  | 13011  | -2924      | 210  | 1287 | C |
| ATOM   | 1560 | C   | ALA | D | 31 | 92.430  | 27.054 | 24.094 | 1.00106.07 |      |      | C |
| ANISOU | 1560 | C   | ALA | D | 31 | 8578    | 18393  | 13332  | -2815      | 201  | 1104 | C |
| ATOM   | 1561 | O   | ALA | D | 31 | 92.705  | 26.667 | 22.956 | 1.00106.01 |      |      | O |
| ANISOU | 1561 | O   | ALA | D | 31 | 8536    | 18411  | 13331  | -2691      | 286  | 1208 | O |
| ATOM   | 1562 | N   | ALA | D | 32 | 91.188  | 27.078 | 24.572 | 1.00109.32 |      |      | N |
| ANISOU | 1562 | N   | ALA | D | 32 | 9090    | 18760  | 13687  | -2891      | 91   | 844  | N |
| ATOM   | 1563 | CA  | ALA | D | 32 | 90.059  | 26.661 | 23.750 | 1.00096.43 |      |      | C |
| ANISOU | 1563 | CA  | ALA | D | 32 | 7533    | 17102  | 12003  | -2836      | 50   | 657  | C |
| ATOM   | 1564 | CB  | ALA | D | 32 | 88.763  | 26.690 | 24.546 | 1.00082.67 |      |      | C |

|        |      |     |     |   |    |        |        |        |            |       |      |   |
|--------|------|-----|-----|---|----|--------|--------|--------|------------|-------|------|---|
| ANISOU | 1564 | CB  | ALA | D | 32 | 5915   | 15313  | 10183  | -2932      | -64   | 377  | C |
| ATOM   | 1565 | C   | ALA | D | 32 | 89.952 | 27.556 | 22.530 | 1.00101.25 |       |      | C |
| ANISOU | 1565 | C   | ALA | D | 32 | 8083   | 17674  | 12714  | -2754      | 81    | 690  | C |
| ATOM   | 1566 | O   | ALA | D | 32 | 89.848 | 27.059 | 21.405 | 1.00115.54 |       |      | O |
| ANISOU | 1566 | O   | ALA | D | 32 | 9882   | 19502  | 14515  | -2635      | 129   | 712  | O |
| ATOM   | 1567 | N   | THR | D | 33 | 90.007 | 28.870 | 22.759 | 1.00       | 98.10 |      | N |
| ANISOU | 1567 | N   | THR | D | 33 | 7640   | 17224  | 12411  | -2811      | 58    | 700  | N |
| ATOM   | 1568 | CA  | THR | D | 33 | 89.930 | 29.851 | 21.676 | 1.00       | 96.23 |      | C |
| ANISOU | 1568 | CA  | THR | D | 33 | 7341   | 16946  | 12277  | -2742      | 87    | 734  | C |
| ATOM   | 1569 | CB  | THR | D | 33 | 90.179 | 31.264 | 22.191 | 1.00       | 93.01 |      | C |
| ANISOU | 1569 | CB  | THR | D | 33 | 6879   | 16489  | 11973  | -2823      | 64    | 769  | C |
| ATOM   | 1570 | OG1 | THR | D | 33 | 89.144 | 31.614 | 23.112 | 1.00       | 84.65 |      | O |
| ANISOU | 1570 | OG1 | THR | D | 33 | 5915   | 15378  | 10871  | -2933      | -61   | 537  | O |
| ATOM   | 1571 | CG2 | THR | D | 33 | 90.188 | 32.254 | 21.043 | 1.00       | 96.36 |      | C |
| ANISOU | 1571 | CG2 | THR | D | 33 | 7232   | 16876  | 12505  | -2747      | 106   | 822  | C |
| ATOM   | 1572 | C   | THR | D | 33 | 90.927 | 29.555 | 20.560 | 1.00       | 98.85 |      | C |
| ANISOU | 1572 | C   | THR | D | 33 | 7578   | 17332  | 12649  | -2598      | 237   | 977  | C |
| ATOM   | 1573 | O   | THR | D | 33 | 90.569 | 29.497 | 19.380 | 1.00       | 99.25 |      | O |
| ANISOU | 1573 | O   | THR | D | 33 | 7619   | 17379  | 12711  | -2484      | 274   | 957  | O |
| ATOM   | 1574 | N   | VAL | D | 34 | 92.181 | 29.355 | 20.945 | 1.00103.17 |       |      | N |
| ANISOU | 1574 | N   | VAL | D | 34 | 8061   | 17933  | 13208  | -2593      | 329   | 1208 | N |
| ATOM   | 1575 | CA  | VAL | D | 34 | 93.215 | 29.044 | 19.981 | 1.00104.91 |       |      | C |
| ANISOU | 1575 | CA  | VAL | D | 34 | 8207   | 18210  | 13444  | -2447      | 491   | 1462 | C |
| ATOM   | 1576 | CB  | VAL | D | 34 | 94.607 | 28.984 | 20.648 | 1.00       | 98.00 |      | C |
| ANISOU | 1576 | CB  | VAL | D | 34 | 7270   | 17384  | 12581  | -2465      | 566   | 1709 | C |
| ATOM   | 1577 | CG1 | VAL | D | 34 | 95.675 | 28.540 | 19.646 | 1.00       | 93.79 |      | C |
| ANISOU | 1577 | CG1 | VAL | D | 34 | 6685   | 16915  | 12036  | -2296      | 743   | 1982 | C |
| ATOM   | 1578 | CG2 | VAL | D | 34 | 94.957 | 30.330 | 21.262 | 1.00       | 98.01 |      | C |
| ANISOU | 1578 | CG2 | VAL | D | 34 | 7211   | 17341  | 12686  | -2561      | 535   | 1750 | C |
| ATOM   | 1579 | C   | VAL | D | 34 | 92.908 | 27.713 | 19.308 | 1.00105.84 |       |      | C |
| ANISOU | 1579 | C   | VAL | D | 34 | 8376   | 18376  | 13463  | -2336      | 530   | 1430 | C |
| ATOM   | 1580 | O   | VAL | D | 34 | 92.986 | 27.594 | 18.084 | 1.00113.55 |       |      | O |
| ANISOU | 1580 | O   | VAL | D | 34 | 9328   | 19373  | 14444  | -2182      | 636   | 1509 | O |
| ATOM   | 1581 | N   | LEU | D | 35 | 92.485 | 26.733 | 20.097 | 1.00106.57 |       |      | N |
| ANISOU | 1581 | N   | LEU | D | 35 | 8546   | 18485  | 13460  | -2405      | 445   | 1301 | N |
| ATOM   | 1582 | CA  | LEU | D | 35 | 92.200 | 25.418 | 19.547 | 1.00111.21 |       |      | C |
| ANISOU | 1582 | CA  | LEU | D | 35 | 9183   | 19120  | 13950  | -2306      | 473   | 1264 | C |
| ATOM   | 1583 | CB  | LEU | D | 35 | 92.018 | 24.388 | 20.666 | 1.00118.25 |       |      | C |
| ANISOU | 1583 | CB  | LEU | D | 35 | 10152  | 20039  | 14740  | -2404      | 391   | 1168 | C |
| ATOM   | 1584 | CG  | LEU | D | 35 | 91.821 | 22.936 | 20.215 | 1.00123.23 |       |      | C |
| ANISOU | 1584 | CG  | LEU | D | 35 | 10833  | 20724  | 15266  | -2309      | 419   | 1142 | C |
| ATOM   | 1585 | CD1 | LEU | D | 35 | 92.991 | 22.469 | 19.349 | 1.00122.63 |       |      | C |
| ANISOU | 1585 | CD1 | LEU | D | 35 | 10689  | 20716  | 15190  | -2143      | 595   | 1426 | C |
| ATOM   | 1586 | CD2 | LEU | D | 35 | 91.640 | 22.011 | 21.414 | 1.00124.14 |       |      | C |
| ANISOU | 1586 | CD2 | LEU | D | 35 | 11024  | 20862  | 15282  | -2420      | 337   | 1043 | C |
| ATOM   | 1587 | C   | LEU | D | 35 | 90.967 | 25.479 | 18.643 | 1.00106.83 |       |      | C |
| ANISOU | 1587 | C   | LEU | D | 35 | 8673   | 18527  | 13391  | -2244      | 416   | 1054 | C |
| ATOM   | 1588 | O   | LEU | D | 35 | 90.874 | 24.732 | 17.667 | 1.00108.55 |       |      | O |
| ANISOU | 1588 | O   | LEU | D | 35 | 8894   | 18783  | 13565  | -2095      | 488   | 1078 | O |
| ATOM   | 1589 | N   | LEU | D | 36 | 90.046 | 26.394 | 18.943 | 1.00100.74 |       |      | N |
| ANISOU | 1589 | N   | LEU | D | 36 | 7937   | 17680  | 12661  | -2343      | 291   | 855  | N |
| ATOM   | 1590 | CA  | LEU | D | 36 | 88.834 | 26.560 | 18.134 | 1.00100.79 |       |      | C |
| ANISOU | 1590 | CA  | LEU | D | 36 | 7991   | 17641  | 12662  | -2290      | 212   | 640  | C |
| ATOM   | 1591 | CB  | LEU | D | 36 | 87.839 | 27.504 | 18.816 | 1.00       | 95.70 |      | C |
| ANISOU | 1591 | CB  | LEU | D | 36 | 7415   | 16911  | 12036  | -2430      | 60    | 412  | C |
| ATOM   | 1592 | CG  | LEU | D | 36 | 86.488 | 27.603 | 18.097 | 1.00       | 85.98 |      | C |
| ANISOU | 1592 | CG  | LEU | D | 36 | 6262   | 15628  | 10777  | -2385      | -48   | 160  | C |
| ATOM   | 1593 | CD1 | LEU | D | 36 | 85.846 | 26.226 | 18.018 | 1.00       | 80.72 |      | C |
| ANISOU | 1593 | CD1 | LEU | D | 36 | 5690   | 14994  | 9985   | -2342      | -92   | 15   | C |
| ATOM   | 1594 | CD2 | LEU | D | 36 | 85.547 | 28.602 | 18.773 | 1.00       | 77.86 |      | C |
| ANISOU | 1594 | CD2 | LEU | D | 36 | 5313   | 14513  | 9756   | -2511      | -176  | -49  | C |
| ATOM   | 1595 | C   | LEU | D | 36 | 89.161 | 27.082 | 16.733 | 1.00101.25 |       |      | C |
| ANISOU | 1595 | C   | LEU | D | 36 | 7961   | 17708  | 12799  | -2124      | 332   | 773  | C |

|        |      |     |     |   |    |        |        |        |       |        |      |   |
|--------|------|-----|-----|---|----|--------|--------|--------|-------|--------|------|---|
| ATOM   | 1596 | O   | LEU | D | 36 | 88.757 | 26.485 | 15.733 | 1.00  | 97.08  | O    |   |
| ANISOU | 1596 | O   | LEU | D | 36 | 7434   | 17247  | 12206  | -1986 | 362    | 737  | O |
| ATOM   | 1597 | N   | VAL | D | 37 | 89.867 | 28.213 | 16.680 | 1.00  | 101.31 | N    |   |
| ANISOU | 1597 | N   | VAL | D | 37 | 7886   | 17697  | 12909  | -2140 | 402    | 930  | N |
| ATOM   | 1598 | CA  | VAL | D | 37 | 90.279 | 28.843 | 15.425 | 1.00  | 98.86  | C    |   |
| ANISOU | 1598 | CA  | VAL | D | 37 | 7497   | 17396  | 12670  | -1983 | 545    | 1079 | C |
| ATOM   | 1599 | CB  | VAL | D | 37 | 91.141 | 30.090 | 15.700 | 1.00  | 94.39  | C    |   |
| ANISOU | 1599 | CB  | VAL | D | 37 | 6851   | 16806  | 12208  | -2044 | 605    | 1252 | C |
| ATOM   | 1600 | CG1 | VAL | D | 37 | 91.656 | 30.692 | 14.406 | 1.00  | 94.86  | C    |   |
| ANISOU | 1600 | CG1 | VAL | D | 37 | 6826   | 16934  | 12283  | -1881 | 773    | 1451 | C |
| ATOM   | 1601 | CG2 | VAL | D | 37 | 90.336 | 31.120 | 16.468 | 1.00  | 94.75  | C    |   |
| ANISOU | 1601 | CG2 | VAL | D | 37 | 6921   | 16765  | 12314  | -2212 | 429    | 1049 | C |
| ATOM   | 1602 | C   | VAL | D | 37 | 91.060 | 27.859 | 14.552 | 1.00  | 102.38 | C    |   |
| ANISOU | 1602 | C   | VAL | D | 37 | 7871   | 18104  | 12924  | -1818 | 717    | 1350 | C |
| ATOM   | 1603 | O   | VAL | D | 37 | 91.003 | 27.909 | 13.325 | 1.00  | 103.02 | O    |   |
| ANISOU | 1603 | O   | VAL | D | 37 | 7855   | 18457  | 12832  | -1666 | 803    | 1501 | O |
| ATOM   | 1604 | N   | ILE | D | 38 | 91.740 | 26.922 | 15.197 | 1.00  | 100.99 | N    |   |
| ANISOU | 1604 | N   | ILE | D | 38 | 7747   | 17872  | 12753  | -1825 | 765    | 1422 | N |
| ATOM   | 1605 | CA  | ILE | D | 38 | 92.489 | 25.899 | 14.487 | 1.00  | 100.40 | C    |   |
| ANISOU | 1605 | CA  | ILE | D | 38 | 7624   | 18040  | 12482  | -1662 | 917    | 1693 | C |
| ATOM   | 1606 | CB  | ILE | D | 38 | 93.473 | 25.167 | 15.435 | 1.00  | 103.98 | C    |   |
| ANISOU | 1606 | CB  | ILE | D | 38 | 8143   | 18352  | 13011  | -1704 | 965    | 1770 | C |
| ATOM   | 1607 | CG1 | ILE | D | 38 | 94.560 | 26.135 | 15.910 | 1.00  | 101.47 | C    |   |
| ANISOU | 1607 | CG1 | ILE | D | 38 | 7769   | 17984  | 12800  | -1765 | 1021   | 1960 | C |
| ATOM   | 1608 | CD1 | ILE | D | 38 | 95.416 | 25.599 | 17.027 | 1.00  | 114.63 | C    |   |
| ANISOU | 1608 | CD1 | ILE | D | 38 | 9431   | 19686  | 14437  | -1860 | 996    | 2075 | C |
| ATOM   | 1609 | CG2 | ILE | D | 38 | 94.122 | 23.983 | 14.736 | 1.00  | 96.81  | C    |   |
| ANISOU | 1609 | CG2 | ILE | D | 38 | 7212   | 17677  | 11895  | -1526 | 1100   | 2027 | C |
| ATOM   | 1610 | C   | ILE | D | 38 | 91.521 | 24.908 | 13.857 | 1.00  | 95.24  | C    |   |
| ANISOU | 1610 | C   | ILE | D | 38 | 6966   | 17617  | 11602  | -1579 | 859    | 1580 | C |
| ATOM   | 1611 | O   | ILE | D | 38 | 91.650 | 24.570 | 12.682 | 1.00  | 94.66  | O    |   |
| ANISOU | 1611 | O   | ILE | D | 38 | 6820   | 17822  | 11326  | -1362 | 982    | 1777 | O |
| ATOM   | 1612 | N   | VAL | D | 39 | 90.545 | 24.467 | 14.647 | 1.00  | 96.01  | N    |   |
| ANISOU | 1612 | N   | VAL | D | 39 | 7161   | 17585  | 11735  | -1721 | 679    | 1261 | N |
| ATOM   | 1613 | CA  | VAL | D | 39 | 89.515 | 23.537 | 14.186 | 1.00  | 96.80  | C    |   |
| ANISOU | 1613 | CA  | VAL | D | 39 | 7274   | 17876  | 11628  | -1670 | 590    | 1078 | C |
| ATOM   | 1614 | CB  | VAL | D | 39 | 88.550 | 23.166 | 15.331 | 1.00  | 87.04  | C    |   |
| ANISOU | 1614 | CB  | VAL | D | 39 | 6193   | 16390  | 10487  | -1846 | 392    | 736  | C |
| ATOM   | 1615 | CG1 | VAL | D | 39 | 87.398 | 22.311 | 14.812 | 1.00  | 80.27  | C    |   |
| ANISOU | 1615 | CG1 | VAL | D | 39 | 5364   | 15719  | 9417   | -1801 | 285    | 498  | C |
| ATOM   | 1616 | CG2 | VAL | D | 39 | 89.305 | 22.442 | 16.435 | 1.00  | 90.84  | C    |   |
| ANISOU | 1616 | CG2 | VAL | D | 39 | 6752   | 16688  | 11073  | -1906 | 427    | 808  | C |
| ATOM   | 1617 | C   | VAL | D | 39 | 88.716 | 24.105 | 13.010 | 1.00  | 97.77  | C    |   |
| ANISOU | 1617 | C   | VAL | D | 39 | 7312   | 18224  | 11613  | -1557 | 567    | 1003 | C |
| ATOM   | 1618 | O   | VAL | D | 39 | 88.335 | 23.374 | 12.085 | 1.00  | 90.38  | O    |   |
| ANISOU | 1618 | O   | VAL | D | 39 | 6321   | 17578  | 10441  | -1373 | 601    | 996  | O |
| ATOM   | 1619 | N   | LEU | D | 40 | 88.463 | 25.410 | 13.051 | 1.00  | 98.72  | N    |   |
| ANISOU | 1619 | N   | LEU | D | 40 | 7420   | 18209  | 11878  | -1640 | 512    | 932  | N |
| ATOM   | 1620 | CA  | LEU | D | 40 | 87.751 | 26.070 | 11.967 | 1.00  | 94.42  | C    |   |
| ANISOU | 1620 | CA  | LEU | D | 40 | 6792   | 17863  | 11219  | -1531 | 487    | 853  | C |
| ATOM   | 1621 | CB  | LEU | D | 40 | 87.483 | 27.535 | 12.316 | 1.00  | 90.28  | C    |   |
| ANISOU | 1621 | CB  | LEU | D | 40 | 6289   | 17106  | 10906  | -1675 | 398    | 749  | C |
| ATOM   | 1622 | CG  | LEU | D | 40 | 86.627 | 27.781 | 13.555 | 1.00  | 82.08  | C    |   |
| ANISOU | 1622 | CG  | LEU | D | 40 | 5429   | 15703  | 10054  | -1889 | 189    | 424  | C |
| ATOM   | 1623 | CD1 | LEU | D | 40 | 86.412 | 29.274 | 13.799 | 1.00  | 85.50  | C    |   |
| ANISOU | 1623 | CD1 | LEU | D | 40 | 5882   | 15913  | 10692  | -1976 | 124    | 361  | C |
| ATOM   | 1624 | CD2 | LEU | D | 40 | 85.306 | 27.069 | 13.380 | 1.00  | 81.84  | C    |   |
| ANISOU | 1624 | CD2 | LEU | D | 40 | 5494   | 15734  | 9866   | -1888 | 23     | 93   | C |
| ATOM   | 1625 | C   | LEU | D | 40 | 88.544 | 25.990 | 10.663 | 1.00  | 97.30  | C    |   |
| ANISOU | 1625 | C   | LEU | D | 40 | 7021   | 18541  | 11406  | -1226 | 728    | 1219 | C |
| ATOM   | 1626 | O   | LEU | D | 40 | 88.059 | 25.463 | 9.658  | 1.00  | 98.49  | O    |   |
| ANISOU | 1626 | O   | LEU | D | 40 | 7120   | 18979  | 11322  | -982  | 768    | 1189 | O |
| ATOM   | 1627 | N   | LEU | D | 41 | 89.788 | 26.460 | 10.705 | 1.00  | 99.54  | N    |   |

|        |      |     |     |   |    |        |        |        |       |        |      |   |
|--------|------|-----|-----|---|----|--------|--------|--------|-------|--------|------|---|
| ANISOU | 1627 | N   | LEU | D | 41 | 7278   | 18744  | 11799  | -1193 | 901    | 1562 | N |
| ATOM   | 1628 | CA  | LEU | D | 41 | 90.649 | 26.459 | 9.527  | 1.00  | 91.38  |      | C |
| ANISOU | 1628 | CA  | LEU | D | 41 | 6182   | 17919  | 10620  | -868  | 1160   | 1963 | C |
| ATOM   | 1629 | CB  | LEU | D | 41 | 91.993 | 27.121 | 9.827  | 1.00  | 88.18  |      | C |
| ANISOU | 1629 | CB  | LEU | D | 41 | 5779   | 17337  | 10387  | -906  | 1295   | 2272 | C |
| ATOM   | 1630 | CG  | LEU | D | 41 | 91.950 | 28.556 | 10.348 | 1.00  | 93.64  |      | C |
| ANISOU | 1630 | CG  | LEU | D | 41 | 6446   | 17816  | 11316  | -1120 | 1205   | 2167 | C |
| ATOM   | 1631 | CD1 | LEU | D | 41 | 93.355 | 29.098 | 10.580 | 1.00  | 88.69  |      | C |
| ANISOU | 1631 | CD1 | LEU | D | 41 | 5822   | 17049  | 10829  | -1118 | 1349   | 2462 | C |
| ATOM   | 1632 | CD2 | LEU | D | 41 | 91.172 | 29.428 | 9.385  | 1.00  | 89.25  |      | C |
| ANISOU | 1632 | CD2 | LEU | D | 41 | 5813   | 17407  | 10690  | -1009 | 1196   | 2113 | C |
| ATOM   | 1633 | C   | LEU | D | 41 | 90.881 | 25.052 | 9.027  | 1.00  | 100.42 |      | C |
| ANISOU | 1633 | C   | LEU | D | 41 | 7363   | 19257  | 11536  | -619  | 1282   | 2101 | C |
| ATOM   | 1634 | O   | LEU | D | 41 | 90.845 | 24.799 | 7.828  | 1.00  | 103.24 |      | O |
| ANISOU | 1634 | O   | LEU | D | 41 | 7720   | 19835  | 11670  | -253  | 1446   | 2263 | O |
| ATOM   | 1635 | N   | ALA | D | 42 | 91.111 | 24.131 | 9.950  | 1.00  | 104.62 |      | N |
| ANISOU | 1635 | N   | ALA | D | 42 | 7957   | 19681  | 12114  | -778  | 1212   | 2033 | N |
| ATOM   | 1636 | CA  | ALA | D | 42 | 91.363 | 22.747 | 9.576  | 1.00  | 103.44 |      | C |
| ANISOU | 1636 | CA  | ALA | D | 42 | 7852   | 19690  | 11759  | -562  | 1315   | 2156 | C |
| ATOM   | 1637 | CB  | ALA | D | 42 | 91.735 | 21.923 | 10.814 | 1.00  | 98.56  |      | C |
| ANISOU | 1637 | CB  | ALA | D | 42 | 7299   | 18896  | 11253  | -798  | 1223   | 2080 | C |
| ATOM   | 1638 | C   | ALA | D | 42 | 90.148 | 22.133 | 8.883  | 1.00  | 104.05 |      | C |
| ANISOU | 1638 | C   | ALA | D | 42 | 7920   | 20010  | 11605  | -384  | 1250   | 1902 | C |
| ATOM   | 1639 | O   | ALA | D | 42 | 90.257 | 21.613 | 7.773  | 1.00  | 106.43 |      | O |
| ANISOU | 1639 | O   | ALA | D | 42 | 8261   | 20515  | 11665  | 17    | 1433   | 2075 | O |
| ATOM   | 1640 | N   | GLY | D | 43 | 88.990 | 22.242 | 9.539  | 1.00  | 99.07  |      | N |
| ANISOU | 1640 | N   | GLY | D | 43 | 7281   | 19318  | 11045  | -650  | 990    | 1472 | N |
| ATOM   | 1641 | CA  | GLY | D | 43 | 87.731 | 21.716 | 9.039  | 1.00  | 95.52  |      | C |
| ANISOU | 1641 | CA  | GLY | D | 43 | 6822   | 19066  | 10406  | -530  | 860    | 1124 | C |
| ATOM   | 1642 | C   | GLY | D | 43 | 87.284 | 22.368 | 7.753  | 1.00  | 97.13  |      | C |
| ANISOU | 1642 | C   | GLY | D | 43 | 7004   | 19446  | 10455  | -190  | 934    | 1107 | C |
| ATOM   | 1643 | O   | GLY | D | 43 | 86.828 | 21.692 | 6.833  | 1.00  | 100.52 |      | O |
| ANISOU | 1643 | O   | GLY | D | 43 | 7800   | 19742  | 10653  | 188   | 905    | 983  | O |
| ATOM   | 1644 | N   | SER | D | 44 | 87.396 | 23.689 | 7.701  | 1.00  | 95.03  |      | N |
| ANISOU | 1644 | N   | SER | D | 44 | 6649   | 19122  | 10335  | -294  | 941    | 1174 | N |
| ATOM   | 1645 | CA  | SER | D | 44 | 87.047 | 24.435 | 6.501  | 1.00  | 98.82  |      | C |
| ANISOU | 1645 | CA  | SER | D | 44 | 7377   | 19472  | 10700  | 45    | 957    | 1145 | C |
| ATOM   | 1646 | CB  | SER | D | 44 | 87.352 | 25.923 | 6.676  | 1.00  | 98.69  |      | C |
| ANISOU | 1646 | CB  | SER | D | 44 | 7128   | 19480  | 10891  | -152  | 997    | 1279 | C |
| ATOM   | 1647 | OG  | SER | D | 44 | 86.510 | 26.469 | 7.672  | 1.00  | 94.12  |      | O |
| ANISOU | 1647 | OG  | SER | D | 44 | 6436   | 18819  | 10506  | -587  | 715    | 904  | O |
| ATOM   | 1648 | C   | SER | D | 44 | 87.809 | 23.862 | 5.314  | 1.00  | 101.08 |      | C |
| ANISOU | 1648 | C   | SER | D | 44 | 7954   | 19696  | 10756  | 564   | 1210   | 1488 | C |
| ATOM   | 1649 | O   | SER | D | 44 | 87.235 | 23.605 | 4.261  | 1.00  | 107.00 |      | O |
| ANISOU | 1649 | O   | SER | D | 44 | 9080   | 20283  | 11293  | 950   | 1164   | 1338 | O |
| ATOM   | 1650 | N   | TYR | D | 45 | 89.112 | 23.679 | 5.496  | 1.00  | 102.78 |      | N |
| ANISOU | 1650 | N   | TYR | D | 45 | 7989   | 20044  | 11017  | 572   | 1477   | 1951 | N |
| ATOM   | 1651 | CA  | TYR | D | 45 | 89.965 | 23.095 | 4.472  | 1.00  | 110.18 |      | C |
| ANISOU | 1651 | CA  | TYR | D | 45 | 9164   | 20950  | 11748  | 1038  | 1735   | 2318 | C |
| ATOM   | 1652 | CB  | TYR | D | 45 | 91.417 | 23.100 | 4.948  | 1.00  | 113.83 |      | C |
| ANISOU | 1652 | CB  | TYR | D | 45 | 9351   | 21567  | 12333  | 924   | 2001   | 2810 | C |
| ATOM   | 1653 | CG  | TYR | D | 45 | 92.366 | 22.365 | 4.031  | 1.00  | 120.46 |      | C |
| ANISOU | 1653 | CG  | TYR | D | 45 | 10407  | 22394  | 12967  | 1369  | 2265   | 3197 | C |
| ATOM   | 1654 | CD1 | TYR | D | 45 | 92.606 | 21.002 | 4.207  | 1.00  | 121.45 |      | C |
| ANISOU | 1654 | CD1 | TYR | D | 45 | 10631  | 22540  | 12975  | 1444  | 2276   | 3220 | C |
| ATOM   | 1655 | CE1 | TYR | D | 45 | 93.466 | 20.313 | 3.379  | 1.00  | 128.11 |      | C |
| ANISOU | 1655 | CE1 | TYR | D | 45 | 11696  | 23339  | 13642  | 1841  | 2481   | 3551 | C |
| ATOM   | 1656 | CZ  | TYR | D | 45 | 94.111 | 20.984 | 2.362  | 1.00  | 129.02 |      | C |
| ANISOU | 1656 | CZ  | TYR | D | 45 | 11947  | 23376  | 13699  | 2169  | 2677   | 3866 | C |
| ATOM   | 1657 | OH  | TYR | D | 45 | 94.974 | 20.291 | 1.541  | 1.00  | 127.56 |      | O |
| ANISOU | 1657 | OH  | TYR | D | 45 | 11996  | 23113  | 13357  | 2555  | 2847   | 4176 | O |
| ATOM   | 1658 | CE2 | TYR | D | 45 | 93.896 | 22.339 | 2.167  | 1.00  | 125.12 |      | C |
| ANISOU | 1658 | CE2 | TYR | D | 45 | 11357  | 22867  | 13315  | 2107  | 2687   | 3862 | C |



|        |      |     |     |   |    |        |        |        |            |       |      |   |
|--------|------|-----|-----|---|----|--------|--------|--------|------------|-------|------|---|
| ATOM   | 1659 | CD2 | TYR | D | 45 | 93.027 | 23.021 | 3.000  | 1.00118.31 |       | C    |   |
| ANISOU | 1659 | CD2 | TYR | D | 45 | 10262  | 22063  | 12627  | 1709       | 2484  | 3530 | C |
| ATOM   | 1660 | C   | TYR | D | 45 | 89.544 | 21.676 | 4.120  | 1.00114.15 |       | C    |   |
| ANISOU | 1660 | C   | TYR | D | 45 | 9951   | 21402  | 12019  | 1291       | 1671  | 2151 | C |
| ATOM   | 1661 | O   | TYR | D | 45 | 89.410 | 21.321 | 2.942  | 1.00126.23 |       | O    |   |
| ANISOU | 1661 | O   | TYR | D | 45 | 11847  | 22798  | 13319  | 1755       | 1724  | 2170 | O |
| ATOM   | 1662 | N   | LEU | D | 46 | 89.400 | 20.858 | 5.141  | 1.00103.87 |       | N    |   |
| ANISOU | 1662 | N   | LEU | D | 46 | 8473   | 20212  | 10782  | 993        | 1571  | 2012 | N |
| ATOM   | 1663 | CA  | LEU | D | 46 | 89.067 | 19.471 | 4.951  | 1.00107.72 |       | C    |   |
| ANISOU | 1663 | CA  | LEU | D | 46 | 9185   | 20671  | 11074  | 1187       | 1513  | 1869 | C |
| ATOM   | 1664 | CB  | LEU | D | 46 | 89.100 | 18.737 | 6.275  | 1.00111.40 |       | C    |   |
| ANISOU | 1664 | CB  | LEU | D | 46 | 9366   | 21294  | 11666  | 778        | 1432  | 1779 | C |
| ATOM   | 1665 | CG  | LEU | D | 46 | 90.480 | 18.388 | 6.817  | 1.00104.13 |       | C    |   |
| ANISOU | 1665 | CG  | LEU | D | 46 | 8229   | 20506  | 10828  | 672        | 1664  | 2222 | C |
| ATOM   | 1666 | CD1 | LEU | D | 46 | 90.495 | 18.436 | 8.326  | 1.00       | 95.09 |      | C |
| ANISOU | 1666 | CD1 | LEU | D | 46 | 6979   | 19188  | 9964   | 136        | 1440  | 2049 | C |
| ATOM   | 1667 | CD2 | LEU | D | 46 | 90.876 | 17.009 | 6.350  | 1.00106.14 |       | C    |   |
| ANISOU | 1667 | CD2 | LEU | D | 46 | 8658   | 20819  | 10851  | 996        | 1799  | 2375 | C |
| ATOM   | 1668 | C   | LEU | D | 46 | 87.730 | 19.333 | 4.285  | 1.00109.75 |       | C    |   |
| ANISOU | 1668 | C   | LEU | D | 46 | 9780   | 20737  | 11181  | 1390       | 1273  | 1418 | C |
| ATOM   | 1669 | O   | LEU | D | 46 | 87.501 | 18.417 | 3.522  | 1.00115.76 |       | O    |   |
| ANISOU | 1669 | O   | LEU | D | 46 | 10859  | 21408  | 11719  | 1755       | 1273  | 1359 | O |
| ATOM   | 1670 | N   | ALA | D | 47 | 86.831 | 20.245 | 4.585  | 1.00107.51 |       | N    |   |
| ANISOU | 1670 | N   | ALA | D | 47 | 9430   | 20395  | 11026  | 1151       | 1062  | 1090 | N |
| ATOM   | 1671 | CA  | ALA | D | 47 | 85.502 | 20.172 | 4.023  | 1.00110.52 |       | C    |   |
| ANISOU | 1671 | CA  | ALA | D | 47 | 10117  | 20596  | 11282  | 1311       | 818   | 631  | C |
| ATOM   | 1672 | CB  | ALA | D | 47 | 84.666 | 21.285 | 4.593  | 1.00103.99 |       | C    |   |
| ANISOU | 1672 | CB  | ALA | D | 47 | 9124   | 19745  | 10643  | 954        | 599   | 312  | C |
| ATOM   | 1673 | C   | ALA | D | 47 | 85.461 | 20.239 | 2.514  | 1.00113.26 |       | C    |   |
| ANISOU | 1673 | C   | ALA | D | 47 | 10866  | 20770  | 11397  | 1863       | 910   | 707  | C |
| ATOM   | 1674 | O   | ALA | D | 47 | 84.729 | 19.505 | 1.879  | 1.00111.67 |       | O    |   |
| ANISOU | 1674 | O   | ALA | D | 47 | 10985  | 20440  | 11003  | 2147       | 795   | 454  | O |
| ATOM   | 1675 | N   | VAL | D | 48 | 86.240 | 21.122 | 1.930  | 1.00115.59 |       | N    |   |
| ANISOU | 1675 | N   | VAL | D | 48 | 11148  | 21059  | 11712  | 2024       | 1116  | 1053 | N |
| ATOM   | 1676 | CA  | VAL | D | 48 | 86.245 | 21.246 | 0.495  | 1.00110.15 |       | C    |   |
| ANISOU | 1676 | CA  | VAL | D | 48 | 10831  | 20211  | 10808  | 2551       | 1215  | 1146 | C |
| ATOM   | 1677 | CB  | VAL | D | 48 | 87.192 | 22.341 | 0.063  | 1.00105.62 |       | C    |   |
| ANISOU | 1677 | CB  | VAL | D | 48 | 10163  | 19660  | 10307  | 2640       | 1451  | 1555 | C |
| ATOM   | 1678 | CG1 | VAL | D | 48 | 87.000 | 22.637 | -1.393 | 1.00113.31 |       | C    |   |
| ANISOU | 1678 | CG1 | VAL | D | 48 | 11524  | 20454  | 11075  | 3156       | 1513  | 1582 | C |
| ATOM   | 1679 | CG2 | VAL | D | 48 | 86.927 | 23.579 | 0.868  | 1.00109.92 |       | C    |   |
| ANISOU | 1679 | CG2 | VAL | D | 48 | 10404  | 20250  | 11110  | 2199       | 1340  | 1436 | C |
| ATOM   | 1680 | C   | VAL | D | 48 | 86.714 | 19.959 | -0.123 | 1.00117.67 |       | C    |   |
| ANISOU | 1680 | C   | VAL | D | 48 | 12017  | 21159  | 11535  | 2936       | 1351  | 1327 | C |
| ATOM   | 1681 | O   | VAL | D | 48 | 86.183 | 19.534 | -1.123 | 1.00127.37 |       | O    |   |
| ANISOU | 1681 | O   | VAL | D | 48 | 13611  | 22235  | 12548  | 3341       | 1302  | 1177 | O |
| ATOM   | 1682 | N   | LEU | D | 49 | 87.716 | 19.336 | 0.476  | 1.00116.35 |       | N    |   |
| ANISOU | 1682 | N   | LEU | D | 49 | 11634  | 21158  | 11416  | 2812       | 1522  | 1648 | N |
| ATOM   | 1683 | CA  | LEU | D | 49 | 88.251 | 18.093 | -0.048 | 1.00124.94 |       | C    |   |
| ANISOU | 1683 | CA  | LEU | D | 49 | 12917  | 22258  | 12295  | 3158       | 1660  | 1848 | C |
| ATOM   | 1684 | CB  | LEU | D | 49 | 89.447 | 17.624 | 0.788  | 1.00131.57 |       | C    |   |
| ANISOU | 1684 | CB  | LEU | D | 49 | 13446  | 23306  | 13237  | 2936       | 1856  | 2226 | C |
| ATOM   | 1685 | CG  | LEU | D | 49 | 90.306 | 16.428 | 0.331  | 1.00140.89 |       | C    |   |
| ANISOU | 1685 | CG  | LEU | D | 49 | 14765  | 24538  | 14228  | 3263       | 2055  | 2540 | C |
| ATOM   | 1686 | CD1 | LEU | D | 49 | 91.774 | 16.534 | 0.705  | 1.00147.46 |       | C    |   |
| ANISOU | 1686 | CD1 | LEU | D | 49 | 15329  | 25545  | 15156  | 3168       | 2343  | 3058 | C |
| ATOM   | 1687 | CD2 | LEU | D | 49 | 89.736 | 15.108 | 0.786  | 1.00136.25 |       | C    |   |
| ANISOU | 1687 | CD2 | LEU | D | 49 | 14243  | 23966  | 13559  | 3203       | 1892  | 2266 | C |
| ATOM   | 1688 | C   | LEU | D | 49 | 87.208 | 17.018 | -0.049 | 1.00123.18 |       | C    |   |
| ANISOU | 1688 | C   | LEU | D | 49 | 12909  | 21953  | 11940  | 3229       | 1430  | 1432 | C |
| ATOM   | 1689 | O   | LEU | D | 49 | 87.101 | 16.261 | -0.988 | 1.00130.52 |       | O    |   |
| ANISOU | 1689 | O   | LEU | D | 49 | 14167  | 22784  | 12640  | 3662       | 1458  | 1429 | O |
| ATOM   | 1690 | N   | ALA | D | 50 | 86.436 | 16.932 | 1.011  | 1.00113.22 |       | N    |   |

|        |      |     |     |   |    |        |        |        |            |      |       |   |
|--------|------|-----|-----|---|----|--------|--------|--------|------------|------|-------|---|
| ANISOU | 1690 | N   | ALA | D | 50 | 11459  | 20734  | 10825  | 2805       | 1200 | 1079  | N |
| ATOM   | 1691 | CA  | ALA | D | 50 | 85.427 | 15.888 | 1.043  | 1.00118.18 |      |       | C |
| ANISOU | 1691 | CA  | ALA | D | 50 | 12284  | 21283  | 11336  | 2860       | 977  | 677   | C |
| ATOM   | 1692 | CB  | ALA | D | 50 | 84.911 | 15.696 | 2.474  | 1.00118.40 |      |       | C |
| ANISOU | 1692 | CB  | ALA | D | 50 | 12005  | 21420  | 11560  | 2318       | 780  | 399   | C |
| ATOM   | 1693 | C   | ALA | D | 50 | 84.275 | 16.195 | 0.082  | 1.00121.80 |      |       | C |
| ANISOU | 1693 | C   | ALA | D | 50 | 13096  | 21524  | 11660  | 3151       | 795  | 308   | C |
| ATOM   | 1694 | O   | ALA | D | 50 | 83.680 | 15.284 | -0.495 | 1.00121.97 |      |       | O |
| ANISOU | 1694 | O   | ALA | D | 50 | 13415  | 21435  | 11494  | 3445       | 696  | 94    | O |
| ATOM   | 1695 | N   | GLU | D | 51 | 83.978 | 17.486 | -0.089 | 1.00123.97 |      |       | N |
| ANISOU | 1695 | N   | GLU | D | 51 | 13334  | 21735  | 12033  | 3072       | 752  | 237   | N |
| ATOM   | 1696 | CA  | GLU | D | 51 | 82.842 | 17.928 | -0.903 | 1.00116.61 |      |       | C |
| ANISOU | 1696 | CA  | GLU | D | 51 | 12707  | 20600  | 11000  | 3296       | 566  | -137  | C |
| ATOM   | 1697 | CB  | GLU | D | 51 | 82.221 | 19.183 | -0.285 | 1.00112.18 |      |       | C |
| ANISOU | 1697 | CB  | GLU | D | 51 | 11939  | 20033  | 10649  | 2904       | 401  | -377  | C |
| ATOM   | 1698 | CG  | GLU | D | 51 | 81.703 | 18.962 | 1.121  | 1.00103.78 |      |       | C |
| ANISOU | 1698 | CG  | GLU | D | 51 | 10576  | 19080  | 9775   | 2370       | 199  | -654  | C |
| ATOM   | 1699 | CD  | GLU | D | 51 | 80.317 | 18.336 | 1.109  | 1.00100.23 |      |       | C |
| ANISOU | 1699 | CD  | GLU | D | 51 | 10339  | 18504  | 9241   | 2385       | -95  | -1192 | C |
| ATOM   | 1700 | OE1 | GLU | D | 51 | 79.344 | 19.027 | 0.697  | 1.00 92.17 |      |       | O |
| ANISOU | 1700 | OE1 | GLU | D | 51 | 9477   | 17337  | 8206   | 2432       | -275 | -1526 | O |
| ATOM   | 1701 | OE2 | GLU | D | 51 | 80.207 | 17.146 | 1.496  | 1.00 99.68 |      |       | O |
| ANISOU | 1701 | OE2 | GLU | D | 51 | 10280  | 18476  | 9117   | 2355       | -146 | -1279 | O |
| ATOM   | 1702 | C   | GLU | D | 51 | 83.104 | 18.196 | -2.382 | 1.00120.27 |      |       | C |
| ANISOU | 1702 | C   | GLU | D | 51 | 13513  | 20923  | 11261  | 3851       | 717  | 51    | C |
| ATOM   | 1703 | O   | GLU | D | 51 | 82.298 | 17.786 | -3.214 | 1.00126.89 |      |       | O |
| ANISOU | 1703 | O   | GLU | D | 51 | 14699  | 21597  | 11915  | 4189       | 595  | -221  | O |
| ATOM   | 1704 | N   | ARG | D | 52 | 84.172 | 18.894 | -2.722 | 1.00123.32 |      |       | N |
| ANISOU | 1704 | N   | ARG | D | 52 | 13810  | 21368  | 11680  | 3950       | 972  | 494   | N |
| ATOM   | 1705 | CA  | ARG | D | 52 | 84.365 | 19.251 | -4.112 | 1.00126.75 |      |       | C |
| ANISOU | 1705 | CA  | ARG | D | 52 | 14563  | 21666  | 11932  | 4463       | 1107 | 656   | C |
| ATOM   | 1706 | CB  | ARG | D | 52 | 85.663 | 20.025 | -4.283 | 1.00121.28 |      |       | C |
| ANISOU | 1706 | CB  | ARG | D | 52 | 13700  | 21068  | 11313  | 4496       | 1404 | 1182  | C |
| ATOM   | 1707 | CG  | ARG | D | 52 | 85.731 | 20.822 | -5.562 | 1.00132.94 |      |       | C |
| ANISOU | 1707 | CG  | ARG | D | 52 | 15441  | 22402  | 12668  | 4917       | 1513 | 1306  | C |
| ATOM   | 1708 | CD  | ARG | D | 52 | 86.803 | 21.886 | -5.502 | 1.00142.62 |      |       | C |
| ANISOU | 1708 | CD  | ARG | D | 52 | 16432  | 23719  | 14038  | 4820       | 1752 | 1742  | C |
| ATOM   | 1709 | NE  | ARG | D | 52 | 86.318 | 23.102 | -6.128 | 1.00159.55 |      |       | N |
| ANISOU | 1709 | NE  | ARG | D | 52 | 18693  | 25730  | 16200  | 4920       | 1703 | 1629  | N |
| ATOM   | 1710 | CZ  | ARG | D | 52 | 86.663 | 23.517 | -7.338 | 1.00174.94 |      |       | C |
| ANISOU | 1710 | CZ  | ARG | D | 52 | 20890  | 27576  | 18004  | 5368       | 1868 | 1849  | C |
| ATOM   | 1711 | NH1 | ARG | D | 52 | 87.533 | 22.822 | -8.059 | 1.00179.69 |      |       | N |
| ANISOU | 1711 | NH1 | ARG | D | 52 | 21644  | 28196  | 18432  | 5760       | 2099 | 2210  | N |
| ATOM   | 1712 | NH2 | ARG | D | 52 | 86.143 | 24.640 | -7.822 | 1.00175.26 |      |       | N |
| ANISOU | 1712 | NH2 | ARG | D | 52 | 21023  | 27495  | 18072  | 5422       | 1802 | 1711  | N |
| ATOM   | 1713 | C   | ARG | D | 52 | 84.328 | 18.060 | -5.037 | 1.00131.23 |      |       | C |
| ANISOU | 1713 | C   | ARG | D | 52 | 15483  | 22146  | 12231  | 4952       | 1145 | 663   | C |
| ATOM   | 1714 | O   | ARG | D | 52 | 84.912 | 17.026 | -4.781 | 1.00132.50 |      |       | O |
| ANISOU | 1714 | O   | ARG | D | 52 | 15599  | 22407  | 12337  | 4981       | 1240 | 844   | O |
| ATOM   | 1715 | N   | GLY | D | 53 | 83.612 | 18.227 | -6.130 | 1.00132.49 |      |       | N |
| ANISOU | 1715 | N   | GLY | D | 53 | 16002  | 22116  | 12223  | 5343       | 1064 | 454   | N |
| ATOM   | 1716 | CA  | GLY | D | 53 | 83.474 | 17.181 | -7.111 | 1.00136.19 |      |       | C |
| ANISOU | 1716 | CA  | GLY | D | 53 | 16834  | 22480  | 12430  | 5843       | 1081 | 428   | C |
| ATOM   | 1717 | C   | GLY | D | 53 | 82.344 | 16.230 | -6.813 | 1.00135.14 |      |       | C |
| ANISOU | 1717 | C   | GLY | D | 53 | 16827  | 22277  | 12242  | 5786       | 807  | -50   | C |
| ATOM   | 1718 | O   | GLY | D | 53 | 82.079 | 15.323 | -7.593 | 1.00139.74 |      |       | O |
| ANISOU | 1718 | O   | GLY | D | 53 | 17721  | 22761  | 12614  | 6189       | 782  | -135  | O |
| ATOM   | 1719 | N   | ALA | D | 54 | 81.662 | 16.437 | -5.696 | 1.00127.30 |      |       | N |
| ANISOU | 1719 | N   | ALA | D | 54 | 15597  | 21332  | 11440  | 5292       | 597  | -367  | N |
| ATOM   | 1720 | CA  | ALA | D | 54 | 80.543 | 15.563 | -5.381 | 1.00125.68 |      |       | C |
| ANISOU | 1720 | CA  | ALA | D | 54 | 15504  | 21056  | 11193  | 5220       | 329  | -837  | C |
| ATOM   | 1721 | CB  | ALA | D | 54 | 80.349 | 15.436 | -3.879 | 1.00119.94 |      |       | C |
| ANISOU | 1721 | CB  | ALA | D | 54 | 14408  | 20474  | 10688  | 4629       | 197  | -991  | C |

|        |      |     |     |   |    |        |        |        |            |       |       |   |
|--------|------|-----|-----|---|----|--------|--------|--------|------------|-------|-------|---|
| ATOM   | 1722 | C   | ALA | D | 54 | 79.289 | 16.120 | -6.037 | 1.00130.58 | C     |       |   |
| ANISOU | 1722 | C   | ALA | D | 54 | 16394  | 21471  | 11749  | 5380       | 110   | -1276 | C |
| ATOM   | 1723 | O   | ALA | D | 54 | 79.257 | 17.291 | -6.421 | 1.00139.74 | O     |       |   |
| ANISOU | 1723 | O   | ALA | D | 54 | 17567  | 22574  | 12953  | 5407       | 142   | -1241 | O |
| ATOM   | 1724 | N   | PRO | D | 55 | 78.308 | 15.265 | -6.207 | 1.00125.36 | N     |       |   |
| ANISOU | 1724 | N   | PRO | D | 55 | 15954  | 20697  | 10979  | 5506       | -100  | -1670 | N |
| ATOM   | 1725 | CA  | PRO | D | 55 | 77.065 | 15.657 | -6.829 | 1.00119.75 | C     |       |   |
| ANISOU | 1725 | CA  | PRO | D | 55 | 15518  | 19785  | 10196  | 5673       | -321  | -2117 | C |
| ATOM   | 1726 | CB  | PRO | D | 55 | 76.354 | 14.331 | -7.043 | 1.00114.41 | C     |       |   |
| ANISOU | 1726 | CB  | PRO | D | 55 | 15076  | 19015  | 9382   | 5873       | -480  | -2412 | C |
| ATOM   | 1727 | CG  | PRO | D | 55 | 77.386 | 13.289 | -6.891 | 1.00113.56 | C     |       |   |
| ANISOU | 1727 | CG  | PRO | D | 55 | 14895  | 19047  | 9206   | 5965       | -286  | -2045 | C |
| ATOM   | 1728 | CD  | PRO | D | 55 | 78.318 | 13.842 | -5.880 | 1.00124.91 | C     |       |   |
| ANISOU | 1728 | CD  | PRO | D | 55 | 15920  | 20690  | 10852  | 5528       | -138  | -1716 | C |
| ATOM   | 1729 | C   | PRO | D | 55 | 76.279 | 16.481 | -5.856 | 1.00119.64 | C     |       |   |
| ANISOU | 1729 | C   | PRO | D | 55 | 15268  | 19791  | 10399  | 5163       | -536  | -2451 | C |
| ATOM   | 1730 | O   | PRO | D | 55 | 76.164 | 16.108 | -4.709 | 1.00110.09 | O     |       |   |
| ANISOU | 1730 | O   | PRO | D | 55 | 13793  | 18701  | 9336   | 4739       | -633  | -2556 | O |
| ATOM   | 1731 | N   | GLY | D | 56 | 75.713 | 17.578 | -6.316 | 1.00122.70 | N     |       |   |
| ANISOU | 1731 | N   | GLY | D | 56 | 15759  | 20061  | 10800  | 5211       | -617  | -2628 | N |
| ATOM   | 1732 | CA  | GLY | D | 56 | 74.922 | 18.389 | -5.435 | 1.00118.25 | C     |       |   |
| ANISOU | 1732 | CA  | GLY | D | 56 | 14985  | 19510  | 10435  | 4740       | -832  | -2961 | C |
| ATOM   | 1733 | C   | GLY | D | 56 | 75.663 | 18.762 | -4.188 | 1.00111.00 | C     |       |   |
| ANISOU | 1733 | C   | GLY | D | 56 | 13617  | 18807  | 9752   | 4228       | -750  | -2719 | C |
| ATOM   | 1734 | O   | GLY | D | 56 | 75.233 | 18.443 | -3.110 | 1.00108.18 | O     |       |   |
| ANISOU | 1734 | O   | GLY | D | 56 | 13042  | 18532  | 9531   | 3819       | -911  | -2943 | O |
| ATOM   | 1735 | N   | ALA | D | 57 | 76.800 | 19.409 | -4.332 | 1.00117.16 | N     |       |   |
| ANISOU | 1735 | N   | ALA | D | 57 | 14254  | 19679  | 10580  | 4258       | -494  | -2253 | N |
| ATOM   | 1736 | CA  | ALA | D | 57 | 77.563 | 19.808 | -3.181 | 1.00104.35 | C     |       |   |
| ANISOU | 1736 | CA  | ALA | D | 57 | 12202  | 18260  | 9185   | 3788       | -402  | -2002 | C |
| ATOM   | 1737 | CB  | ALA | D | 57 | 78.903 | 19.142 | -3.224 | 1.00104.95 | C     |       |   |
| ANISOU | 1737 | CB  | ALA | D | 57 | 12192  | 18469  | 9214   | 3925       | -117  | -1495 | C |
| ATOM   | 1738 | C   | ALA | D | 57 | 77.731 | 21.286 | -3.276 | 1.00116.26 | C     |       |   |
| ANISOU | 1738 | C   | ALA | D | 57 | 13595  | 19763  | 10816  | 3675       | -354  | -1900 | C |
| ATOM   | 1739 | O   | ALA | D | 57 | 77.723 | 21.815 | -4.367 | 1.00125.31 | O     |       |   |
| ANISOU | 1739 | O   | ALA | D | 57 | 14995  | 20780  | 11838  | 4048       | -281  | -1837 | O |
| ATOM   | 1740 | N   | GLN | D | 58 | 77.838 | 21.966 | -2.143 | 1.00118.21 | N     |       |   |
| ANISOU | 1740 | N   | GLN | D | 58 | 13465  | 20144  | 11306  | 3164       | -406  | -1900 | N |
| ATOM   | 1741 | CA  | GLN | D | 58 | 78.029 | 23.414 | -2.145 | 1.00120.95 | C     |       |   |
| ANISOU | 1741 | CA  | GLN | D | 58 | 13667  | 20496  | 11790  | 3019       | -364  | -1794 | C |
| ATOM   | 1742 | CB  | GLN | D | 58 | 76.794 | 24.123 | -1.593 | 1.00117.19 | C     |       |   |
| ANISOU | 1742 | CB  | GLN | D | 58 | 13125  | 19963  | 11440  | 2682       | -670  | -2288 | C |
| ATOM   | 1743 | CG  | GLN | D | 58 | 75.487 | 23.763 | -2.280 | 1.00126.34 | C     |       |   |
| ANISOU | 1743 | CG  | GLN | D | 58 | 14655  | 20920  | 12428  | 2937       | -903  | -2773 | C |
| ATOM   | 1744 | CD  | GLN | D | 58 | 75.213 | 24.574 | -3.528 | 1.00136.40 | C     |       |   |
| ANISOU | 1744 | CD  | GLN | D | 58 | 16237  | 22017  | 13572  | 3329       | -876  | -2804 | C |
| ATOM   | 1745 | OE1 | GLN | D | 58 | 75.690 | 25.695 | -3.677 | 1.00140.83 | O     |       |   |
| ANISOU | 1745 | OE1 | GLN | D | 58 | 16689  | 22598  | 14222  | 3286       | -764  | -2585 | O |
| ATOM   | 1746 | NE2 | GLN | D | 58 | 74.428 | 24.008 | -4.430 | 1.00134.58 | N     |       |   |
| ANISOU | 1746 | NE2 | GLN | D | 58 | 16393  | 21609  | 13131  | 3716       | -983  | -3083 | N |
| ATOM   | 1747 | C   | GLN | D | 58 | 79.277 | 23.897 | -1.399 | 1.00112.42 | C     |       |   |
| ANISOU | 1747 | C   | GLN | D | 58 | 12196  | 19614  | 10903  | 2727       | -147  | -1339 | C |
| ATOM   | 1748 | O   | GLN | D | 58 | 79.745 | 25.004 | -1.609 | 1.00114.11 | O     |       |   |
| ANISOU | 1748 | O   | GLN | D | 58 | 12316  | 19837  | 11204  | 2711       | -33   | -1122 | O |
| ATOM   | 1749 | N   | LEU | D | 59 | 79.800 | 23.056 | -0.526 | 1.00107.01 | N     |       |   |
| ANISOU | 1749 | N   | LEU | D | 59 | 11287  | 19086  | 10288  | 2500       | -95   | -1202 | N |
| ATOM   | 1750 | CA  | LEU | D | 59 | 80.978 | 23.368 | 0.280  | 1.00110.10 | C     |       |   |
| ANISOU | 1750 | CA  | LEU | D | 59 | 11294  | 19674  | 10864  | 2206       | 102   | -787  | C |
| ATOM   | 1751 | CB  | LEU | D | 59 | 80.936 | 22.510 | 1.551  | 1.00104.85 | C     |       |   |
| ANISOU | 1751 | CB  | LEU | D | 59 | 10366  | 19159  | 10314  | 1811       | 7     | -891  | C |
| ATOM   | 1752 | CG  | LEU | D | 59 | 81.113 | 23.130 | 2.934  | 1.00       | 90.74 | C     |   |
| ANISOU | 1752 | CG  | LEU | D | 59 | 8127   | 17542  | 8810   | 1235       | -53   | -887  | C |
| ATOM   | 1753 | CD1 | LEU | D | 59 | 80.260 | 24.370 | 3.020  | 1.00       | 85.85 | C     |   |

|        |      |     |     |   |    |        |        |        |       |        |       |   |
|--------|------|-----|-----|---|----|--------|--------|--------|-------|--------|-------|---|
| ANISOU | 1753 | CD1 | LEU | D | 59 | 7468   | 16844  | 8307   | 1041  | -250   | -1190 | C |
| ATOM   | 1754 | CD2 | LEU | D | 59 | 80.696 | 22.127 | 4.001  | 1.00  | 81.86  |       | C |
| ANISOU | 1754 | CD2 | LEU | D | 59 | 6851   | 16511  | 7742   | 922   | -211   | -1123 | C |
| ATOM   | 1755 | C   | LEU | D | 59 | 82.238 | 23.092 | -0.560 | 1.00  | 110.09 |       | C |
| ANISOU | 1755 | C   | LEU | D | 59 | 11400  | 19696  | 10732  | 2605  | 432    | -265  | C |
| ATOM   | 1756 | O   | LEU | D | 59 | 83.124 | 22.327 | -0.165 | 1.00  | 109.48 |       | O |
| ANISOU | 1756 | O   | LEU | D | 59 | 11182  | 19754  | 10661  | 2568  | 594    | 32    | O |
| ATOM   | 1757 | N   | ILE | D | 60 | 82.315 | 23.753 | -1.714 | 1.00  | 117.85 |       | N |
| ANISOU | 1757 | N   | ILE | D | 60 | 12628  | 20549  | 11601  | 2982  | 530    | -154  | N |
| ATOM   | 1758 | CA  | ILE | D | 60 | 83.350 | 23.480 | -2.711 | 1.00  | 117.57 |       | C |
| ANISOU | 1758 | CA  | ILE | D | 60 | 12766  | 20501  | 11403  | 3435  | 823    | 294   | C |
| ATOM   | 1759 | CB  | ILE | D | 60 | 82.674 | 23.125 | -4.058 | 1.00  | 119.87 |       | C |
| ANISOU | 1759 | CB  | ILE | D | 60 | 13534  | 20586  | 11427  | 3971  | 771    | 102   | C |
| ATOM   | 1760 | CG1 | ILE | D | 60 | 81.935 | 24.336 | -4.625 | 1.00  | 112.61 |       | C |
| ANISOU | 1760 | CG1 | ILE | D | 60 | 12749  | 19518  | 10520  | 4037  | 657    | -121  | C |
| ATOM   | 1761 | CD1 | ILE | D | 60 | 81.218 | 24.057 | -5.922 | 1.00  | 113.09 |       | C |
| ANISOU | 1761 | CD1 | ILE | D | 60 | 13272  | 19371  | 10327  | 4552  | 592    | -335  | C |
| ATOM   | 1762 | CG2 | ILE | D | 60 | 81.708 | 21.955 | -3.877 | 1.00  | 112.91 |       | C |
| ANISOU | 1762 | CG2 | ILE | D | 60 | 12817  | 19647  | 10436  | 3988  | 544    | -310  | C |
| ATOM   | 1763 | C   | ILE | D | 60 | 84.392 | 24.576 | -2.968 | 1.00  | 118.24 |       | C |
| ANISOU | 1763 | C   | ILE | D | 60 | 12700  | 20639  | 11588  | 3459  | 1070   | 736   | C |
| ATOM   | 1764 | O   | ILE | D | 60 | 85.213 | 24.442 | -3.873 | 1.00  | 127.93 |       | O |
| ANISOU | 1764 | O   | ILE | D | 60 | 14088  | 21843  | 12676  | 3855  | 1313   | 1102  | O |
| ATOM   | 1765 | N   | THR | D | 61 | 84.357 | 25.658 | -2.196 | 1.00  | 117.46 |       | N |
| ANISOU | 1765 | N   | THR | D | 61 | 12297  | 20606  | 11727  | 3047  | 1009   | 703   | N |
| ATOM   | 1766 | CA  | THR | D | 61 | 85.403 | 26.683 | -2.273 | 1.00  | 119.57 |       | C |
| ANISOU | 1766 | CA  | THR | D | 61 | 12364  | 20942  | 12123  | 3011  | 1242   | 1135  | C |
| ATOM   | 1767 | CB  | THR | D | 61 | 85.026 | 27.932 | -3.125 | 1.00  | 112.98 |       | C |
| ANISOU | 1767 | CB  | THR | D | 61 | 11691  | 19960  | 11275  | 3193  | 1225   | 1076  | C |
| ATOM   | 1768 | OG1 | THR | D | 61 | 84.318 | 28.884 | -2.320 | 1.00  | 108.42 |       | O |
| ANISOU | 1768 | OG1 | THR | D | 61 | 10891  | 19396  | 10909  | 2757  | 1007   | 777   | O |
| ATOM   | 1769 | CG2 | THR | D | 61 | 84.196 | 27.557 | -4.327 | 1.00  | 121.58 |       | C |
| ANISOU | 1769 | CG2 | THR | D | 61 | 13245  | 20848  | 12102  | 3665  | 1136   | 820   | C |
| ATOM   | 1770 | C   | THR | D | 61 | 85.703 | 27.114 | -0.852 | 1.00  | 126.60 |       | C |
| ANISOU | 1770 | C   | THR | D | 61 | 12790  | 22010  | 13300  | 2436  | 1200   | 1171  | C |
| ATOM   | 1771 | O   | THR | D | 61 | 84.817 | 27.076 | 0.006  | 1.00  | 125.27 |       | O |
| ANISOU | 1771 | O   | THR | D | 61 | 12498  | 21862  | 13239  | 2080  | 943    | 779   | O |
| ATOM   | 1772 | N   | TYR | D | 62 | 86.946 | 27.548 | -0.620 | 1.00  | 114.35 |       | N |
| ANISOU | 1772 | N   | TYR | D | 62 | 11464  | 17718  | 14265  | -915  | 345    | 1224  | N |
| ATOM   | 1773 | CA  | TYR | D | 62 | 87.464 | 27.927 | 0.706  | 1.00  | 116.02 |       | C |
| ANISOU | 1773 | CA  | TYR | D | 62 | 11751  | 17853  | 14479  | -1064 | 350    | 1302  | C |
| ATOM   | 1774 | CB  | TYR | D | 62 | 88.980 | 28.170 | 0.634  | 1.00  | 122.60 |       | C |
| ANISOU | 1774 | CB  | TYR | D | 62 | 12397  | 19055  | 15130  | -1019 | 303    | 1398  | C |
| ATOM   | 1775 | CG  | TYR | D | 62 | 89.830 | 26.961 | 0.286  | 1.00  | 124.79 |       | C |
| ANISOU | 1775 | CG  | TYR | D | 62 | 12619  | 19531  | 15265  | -740  | 223    | 1311  | C |
| ATOM   | 1776 | CD1 | TYR | D | 62 | 89.890 | 25.871 | 1.121  | 1.00  | 121.64 |       | C |
| ANISOU | 1776 | CD1 | TYR | D | 62 | 12381  | 18964  | 14873  | -625  | 184    | 1213  | C |
| ATOM   | 1777 | CE1 | TYR | D | 62 | 90.661 | 24.774 | 0.812  | 1.00  | 124.41 |       | C |
| ANISOU | 1777 | CE1 | TYR | D | 62 | 12682  | 19493  | 15095  | -373  | 110    | 1134  | C |
| ATOM   | 1778 | CZ  | TYR | D | 62 | 91.389 | 24.763 | -0.336 | 1.00  | 129.81 |       | C |
| ANISOU | 1778 | CZ  | TYR | D | 62 | 13153  | 20528  | 15641  | -232  | 76     | 1154  | C |
| ATOM   | 1779 | OH  | TYR | D | 62 | 92.155 | 23.671 | -0.633 | 1.00  | 131.84 |       | O |
| ANISOU | 1779 | OH  | TYR | D | 62 | 13362  | 20960  | 15770  | 19    | 3      | 1075  | O |
| ATOM   | 1780 | CE2 | TYR | D | 62 | 91.363 | 25.837 | -1.183 | 1.00  | 134.28 |       | C |
| ANISOU | 1780 | CE2 | TYR | D | 62 | 13555  | 21271  | 16195  | -342  | 114    | 1252  | C |
| ATOM   | 1781 | CD2 | TYR | D | 62 | 90.587 | 26.930 | -0.869 | 1.00  | 133.17 |       | C |
| ANISOU | 1781 | CD2 | TYR | D | 62 | 13466  | 20950  | 16184  | -595  | 187    | 1331  | C |
| ATOM   | 1782 | C   | TYR | D | 62 | 86.807 | 29.083 | 1.462  | 1.00  | 105.66 |       | C |
| ANISOU | 1782 | C   | TYR | D | 62 | 10524  | 16320  | 13302  | -1358 | 424    | 1396  | C |
| ATOM   | 1783 | O   | TYR | D | 62 | 86.549 | 28.970 | 2.642  | 1.00  | 108.94 |       | O |
| ANISOU | 1783 | O   | TYR | D | 62 | 11112  | 16483  | 13796  | -1453 | 438    | 1385  | O |
| ATOM   | 1784 | N   | PRO | D | 63 | 86.523 | 30.185 | 0.810  | 1.00  | 96.07  |       | N |
| ANISOU | 1784 | N   | PRO | D | 63 | 9195   | 15191  | 12116  | -1502 | 470    | 1486  | N |

|        |      |     |     |   |    |        |        |        |            |       |      |   |
|--------|------|-----|-----|---|----|--------|--------|--------|------------|-------|------|---|
| ATOM   | 1785 | CA  | PRO | D | 63 | 85.835 | 31.283 | 1.503  | 1.00101.84 | C     |      |   |
| ANISOU | 1785 | CA  | PRO | D | 63 | 10011  | 15701  | 12982  | -1781      | 541   | 1571 | C |
| ATOM   | 1786 | CB  | PRO | D | 63 | 85.747 | 32.361 | 0.422  | 1.00100.43 | C     |      |   |
| ANISOU | 1786 | CB  | PRO | D | 63 | 9648   | 15720  | 12790  | -1874      | 575   | 1663 | C |
| ATOM   | 1787 | CG  | PRO | D | 63 | 86.942 | 32.115 | -0.429 | 1.00       | 99.15 | C    |   |
| ANISOU | 1787 | CG  | PRO | D | 63 | 9275   | 15957  | 12441  | -1699      | 515   | 1687 | C |
| ATOM   | 1788 | CD  | PRO | D | 63 | 87.039 | 30.624 | -0.501 | 1.00       | 98.49 | C    |   |
| ANISOU | 1788 | CD  | PRO | D | 63 | 9265   | 15843  | 12312  | -1437      | 457   | 1540 | C |
| ATOM   | 1789 | C   | PRO | D | 63 | 84.439 | 30.926 | 2.033  | 1.00       | 95.77 | C    |   |
| ANISOU | 1789 | C   | PRO | D | 63 | 9475   | 14515  | 12399  | -1839      | 585   | 1473 | C |
| ATOM   | 1790 | O   | PRO | D | 63 | 83.887 | 31.639 | 2.872  | 1.00       | 89.94 | O    |   |
| ANISOU | 1790 | O   | PRO | D | 63 | 8848   | 13547  | 11777  | -2058      | 638   | 1527 | O |
| ATOM   | 1791 | N   | ARG | D | 64 | 83.875 | 29.854 | 1.489  | 1.00       | 96.33 | N    |   |
| ANISOU | 1791 | N   | ARG | D | 64 | 9609   | 14498  | 12494  | -1644      | 562   | 1333 | N |
| ATOM   | 1792 | CA  | ARG | D | 64 | 82.560 | 29.355 | 1.866  | 1.00       | 94.89 | C    |   |
| ANISOU | 1792 | CA  | ARG | D | 64 | 9641   | 13934  | 12477  | -1662      | 595   | 1224 | C |
| ATOM   | 1793 | CB  | ARG | D | 64 | 81.971 | 28.575 | 0.714  | 1.00101.10 | C     |      |   |
| ANISOU | 1793 | CB  | ARG | D | 64 | 10405  | 14736  | 13271  | -1465      | 578   | 1106 | C |
| ATOM   | 1794 | CG  | ARG | D | 64 | 81.461 | 29.434 | -0.419 | 1.00       | 86.57 | C    |   |
| ANISOU | 1794 | CG  | ARG | D | 64 | 8433   | 12994  | 11464  | -1539      | 620   | 1155 | C |
| ATOM   | 1795 | CD  | ARG | D | 64 | 80.781 | 28.566 | -1.455 | 1.00       | 96.29 | C    |   |
| ANISOU | 1795 | CD  | ARG | D | 64 | 9672   | 14196  | 12718  | -1342      | 603   | 1025 | C |
| ATOM   | 1796 | NE  | ARG | D | 64 | 80.179 | 29.365 | -2.499 | 1.00110.65 | N     |      |   |
| ANISOU | 1796 | NE  | ARG | D | 64 | 11383  | 16074  | 14584  | -1419      | 646   | 1065 | N |
| ATOM   | 1797 | CZ  | ARG | D | 64 | 79.397 | 28.869 | -3.435 | 1.00102.62 | C     |      |   |
| ANISOU | 1797 | CZ  | ARG | D | 64 | 10374  | 15003  | 13614  | -1299      | 647   | 970  | C |
| ATOM   | 1798 | NH1 | ARG | D | 64 | 79.119 | 27.581 | -3.452 | 1.00       | 92.52 | N    |   |
| ANISOU | 1798 | NH1 | ARG | D | 64 | 9204   | 13608  | 12340  | -1097      | 609   | 829  | N |
| ATOM   | 1799 | NH2 | ARG | D | 64 | 78.889 | 29.671 | -4.341 | 1.00102.83 | N     |      |   |
| ANISOU | 1799 | NH2 | ARG | D | 64 | 10300  | 15088  | 13682  | -1384      | 687   | 1016 | N |
| ATOM   | 1800 | C   | ARG | D | 64 | 82.595 | 28.433 | 3.054  | 1.00       | 86.82 | C    |   |
| ANISOU | 1800 | C   | ARG | D | 64 | 8812   | 12694  | 11482  | -1608      | 569   | 1146 | C |
| ATOM   | 1801 | O   | ARG | D | 64 | 81.808 | 28.544 | 3.958  | 1.00       | 86.71 | O    |   |
| ANISOU | 1801 | O   | ARG | D | 64 | 8979   | 12362  | 11603  | -1746      | 610   | 1130 | O |
| ATOM   | 1802 | N   | ALA | D | 65 | 83.560 | 27.542 | 3.024  | 1.00       | 88.45 | N    |   |
| ANISOU | 1802 | N   | ALA | D | 65 | 8969   | 13086  | 11550  | -1406      | 498   | 1103 | N |
| ATOM   | 1803 | CA  | ALA | D | 65 | 83.767 | 26.609 | 4.086  | 1.00       | 93.53 | C    |   |
| ANISOU | 1803 | CA  | ALA | D | 65 | 9775   | 13569  | 12194  | -1332      | 463   | 1031 | C |
| ATOM   | 1804 | CB  | ALA | D | 65 | 84.894 | 25.671 | 3.742  | 1.00       | 90.23 | C    |   |
| ANISOU | 1804 | CB  | ALA | D | 65 | 9257   | 13420  | 11605  | -1086      | 381   | 986  | C |
| ATOM   | 1805 | C   | ALA | D | 65 | 84.097 | 27.394 | 5.327  | 1.00       | 94.08 | C    |   |
| ANISOU | 1805 | C   | ALA | D | 65 | 9905   | 13548  | 12291  | -1552      | 490   | 1139 | C |
| ATOM   | 1806 | O   | ALA | D | 65 | 83.705 | 27.019 | 6.411  | 1.00       | 98.04 | O    |   |
| ANISOU | 1806 | O   | ALA | D | 65 | 10600  | 13773  | 12878  | -1605      | 499   | 1094 | O |
| ATOM   | 1807 | N   | LEU | D | 66 | 84.841 | 28.478 | 5.188  | 1.00       | 93.64 | N    |   |
| ANISOU | 1807 | N   | LEU | D | 66 | 9686   | 13730  | 12162  | -1681      | 503   | 1282 | N |
| ATOM   | 1808 | CA  | LEU | D | 66 | 85.189 | 29.271 | 6.350  | 1.00       | 92.98 | C    |   |
| ANISOU | 1808 | CA  | LEU | D | 66 | 9653   | 13573  | 12101  | -1894      | 529   | 1391 | C |
| ATOM   | 1809 | CB  | LEU | D | 66 | 86.105 | 30.418 | 5.944  | 1.00       | 97.34 | C    |   |
| ANISOU | 1809 | CB  | LEU | D | 66 | 9989   | 14447  | 12549  | -2002      | 534   | 1547 | C |
| ATOM   | 1810 | CG  | LEU | D | 66 | 86.585 | 31.445 | 6.964  | 1.00101.31 | C     |      |   |
| ANISOU | 1810 | CG  | LEU | D | 66 | 10499  | 14938  | 13057  | -2235      | 561   | 1686 | C |
| ATOM   | 1811 | CD1 | LEU | D | 66 | 88.036 | 31.764 | 6.688  | 1.00100.04 | C     |      |   |
| ANISOU | 1811 | CD1 | LEU | D | 66 | 10131  | 15164  | 12715  | -2188      | 515   | 1786 | C |
| ATOM   | 1812 | CD2 | LEU | D | 66 | 85.749 | 32.714 | 6.952  | 1.00       | 89.65 | C    |   |
| ANISOU | 1812 | CD2 | LEU | D | 66 | 9029   | 13327  | 11705  | -2488      | 639   | 1772 | C |
| ATOM   | 1813 | C   | LEU | D | 66 | 83.924 | 29.806 | 6.977  | 1.00       | 90.56 | C    |   |
| ANISOU | 1813 | C   | LEU | D | 66 | 9521   | 12904  | 11985  | -2103      | 603   | 1391 | C |
| ATOM   | 1814 | O   | LEU | D | 66 | 83.778 | 29.782 | 8.175  | 1.00       | 93.13 | O    |   |
| ANISOU | 1814 | O   | LEU | D | 66 | 10005  | 13004  | 12377  | -2211      | 617   | 1394 | O |
| ATOM   | 1815 | N   | TRP | D | 67 | 83.003 | 30.295 | 6.168  | 1.00       | 85.80 | N    |   |
| ANISOU | 1815 | N   | TRP | D | 67 | 8888   | 12242  | 11470  | -2163      | 650   | 1386 | N |
| ATOM   | 1816 | CA  | TRP | D | 67 | 81.757 | 30.797 | 6.693  | 1.00       | 82.65 | C    |   |

|        |      |     |     |   |    |        |        |        |       |       |      |   |
|--------|------|-----|-----|---|----|--------|--------|--------|-------|-------|------|---|
| ANISOU | 1816 | CA  | TRP | D | 67 | 8649   | 11498  | 11254  | -2356 | 721   | 1381 | C |
| ATOM   | 1817 | CB  | TRP | D | 67 | 80.967 | 31.390 | 5.554  | 1.00  | 86.16 |      | C |
| ANISOU | 1817 | CB  | TRP | D | 67 | 9005   | 11970  | 11760  | -2398 | 763   | 1390 | C |
| ATOM   | 1818 | CG  | TRP | D | 67 | 79.563 | 31.763 | 5.828  | 1.00  | 82.73 |      | C |
| ANISOU | 1818 | CG  | TRP | D | 67 | 8726   | 11191  | 11517  | -2556 | 833   | 1362 | C |
| ATOM   | 1819 | CD1 | TRP | D | 67 | 78.507 | 31.497 | 5.045  | 1.00  | 79.97 |      | C |
| ANISOU | 1819 | CD1 | TRP | D | 67 | 8411   | 10714  | 11259  | -2501 | 856   | 1276 | C |
| ATOM   | 1820 | NE1 | TRP | D | 67 | 77.374 | 32.021 | 5.584  | 1.00  | 81.01 |      | N |
| ANISOU | 1820 | NE1 | TRP | D | 67 | 8690   | 10527  | 11562  | -2692 | 924   | 1279 | N |
| ATOM   | 1821 | CE2 | TRP | D | 67 | 77.693 | 32.656 | 6.744  | 1.00  | 80.72 |      | C |
| ANISOU | 1821 | CE2 | TRP | D | 67 | 8717   | 10406  | 11546  | -2879 | 946   | 1369 | C |
| ATOM   | 1822 | CD2 | TRP | D | 67 | 79.064 | 32.526 | 6.922  | 1.00  | 83.94 |      | C |
| ANISOU | 1822 | CD2 | TRP | D | 67 | 9012   | 11091  | 11791  | -2801 | 890   | 1425 | C |
| ATOM   | 1823 | CE3 | TRP | D | 67 | 79.643 | 33.096 | 8.042  | 1.00  | 86.90 |      | C |
| ANISOU | 1823 | CE3 | TRP | D | 67 | 9424   | 11443  | 12152  | -2960 | 899   | 1522 | C |
| ATOM   | 1824 | CZ3 | TRP | D | 67 | 78.850 | 33.756 | 8.916  | 1.00  | 90.73 |      | C |
| ANISOU | 1824 | CZ3 | TRP | D | 67 | 10053  | 11638  | 12783  | -3184 | 962   | 1557 | C |
| ATOM   | 1825 | CH2 | TRP | D | 67 | 77.494 | 33.868 | 8.711  | 1.00  | 85.17 |      | C |
| ANISOU | 1825 | CH2 | TRP | D | 67 | 9457   | 10666  | 12238  | -3255 | 1017  | 1499 | C |
| ATOM   | 1826 | CZ2 | TRP | D | 67 | 76.897 | 33.325 | 7.631  | 1.00  | 78.18 |      | C |
| ANISOU | 1826 | CZ2 | TRP | D | 67 | 8540   | 9794   | 11372  | -3105 | 1010  | 1405 | C |
| ATOM   | 1827 | C   | TRP | D | 67 | 80.972 | 29.677 | 7.283  | 1.00  | 81.73 |      | C |
| ANISOU | 1827 | C   | TRP | D | 67 | 8755   | 11065  | 11235  | -2263 | 714   | 1238 | C |
| ATOM   | 1828 | O   | TRP | D | 67 | 80.471 | 29.779 | 8.374  | 1.00  | 83.13 |      | O |
| ANISOU | 1828 | O   | TRP | D | 67 | 9106   | 10960  | 11519  | -2401 | 747   | 1236 | O |
| ATOM   | 1829 | N   | TRP | D | 68 | 80.900 | 28.577 | 6.564  | 1.00  | 82.14 |      | N |
| ANISOU | 1829 | N   | TRP | D | 68 | 8799   | 11168  | 11243  | -2024 | 668   | 1117 | N |
| ATOM   | 1830 | CA  | TRP | D | 68 | 80.149 | 27.402 | 7.010  | 1.00  | 79.41 |      | C |
| ANISOU | 1830 | CA  | TRP | D | 68 | 8658   | 10532  | 10982  | -1908 | 655   | 969  | C |
| ATOM   | 1831 | CB  | TRP | D | 68 | 80.303 | 26.252 | 6.010  | 1.00  | 80.21 |      | C |
| ANISOU | 1831 | CB  | TRP | D | 68 | 8700   | 10778  | 11000  | -1624 | 596   | 852  | C |
| ATOM   | 1832 | CG  | TRP | D | 68 | 79.803 | 24.945 | 6.553  | 1.00  | 80.81 |      | C |
| ANISOU | 1832 | CG  | TRP | D | 68 | 8975   | 10599  | 11129  | -1482 | 567   | 704  | C |
| ATOM   | 1833 | CD1 | TRP | D | 68 | 78.498 | 24.568 | 6.733  | 1.00  | 76.32 |      | C |
| ANISOU | 1833 | CD1 | TRP | D | 68 | 8588   | 9693   | 10719  | -1505 | 603   | 608  | C |
| ATOM   | 1834 | NE1 | TRP | D | 68 | 78.442 | 23.303 | 7.277  | 1.00  | 76.54 |      | N |
| ANISOU | 1834 | NE1 | TRP | D | 68 | 8766   | 9568   | 10747  | -1348 | 558   | 486  | N |
| ATOM   | 1835 | CE2 | TRP | D | 68 | 79.717 | 22.848 | 7.475  | 1.00  | 85.19 |      | C |
| ANISOU | 1835 | CE2 | TRP | D | 68 | 9782   | 10899  | 11686  | -1222 | 492   | 502  | C |
| ATOM   | 1836 | CD2 | TRP | D | 68 | 80.608 | 23.857 | 7.039  | 1.00  | 84.64 |      | C |
| ANISOU | 1836 | CD2 | TRP | D | 68 | 9503   | 11143  | 11513  | -1302 | 496   | 639  | C |
| ATOM   | 1837 | CE3 | TRP | D | 68 | 81.988 | 23.636 | 7.136  | 1.00  | 76.03 |      | C |
| ANISOU | 1837 | CE3 | TRP | D | 68 | 8294   | 10339  | 10256  | -1200 | 435   | 682  | C |
| ATOM   | 1838 | CZ3 | TRP | D | 68 | 82.435 | 22.431 | 7.651  | 1.00  | 68.86 |      | C |
| ANISOU | 1838 | CZ3 | TRP | D | 68 | 7478   | 9398   | 9289   | -1023 | 371   | 588  | C |
| ATOM   | 1839 | CH2 | TRP | D | 68 | 81.533 | 21.446 | 8.077  | 1.00  | 75.14 |      | C |
| ANISOU | 1839 | CH2 | TRP | D | 68 | 8482   | 9880   | 10189  | -947  | 368   | 452  | C |
| ATOM   | 1840 | CZ2 | TRP | D | 68 | 80.175 | 21.634 | 8.000  | 1.00  | 83.12 |      | C |
| ANISOU | 1840 | CZ2 | TRP | D | 68 | 9613   | 10606  | 11364  | -1044 | 427   | 408  | C |
| ATOM   | 1841 | C   | TRP | D | 68 | 80.572 | 26.911 | 8.384  | 1.00  | 79.82 |      | C |
| ANISOU | 1841 | C   | TRP | D | 68 | 8859   | 10441  | 11028  | -1925 | 632   | 955  | C |
| ATOM   | 1842 | O   | TRP | D | 68 | 79.731 | 26.635 | 9.238  | 1.00  | 84.04 |      | O |
| ANISOU | 1842 | O   | TRP | D | 68 | 9600   | 10640  | 11693  | -1998 | 661   | 897  | O |
| ATOM   | 1843 | N   | SER | D | 69 | 81.881 | 26.820 | 8.590  | 1.00  | 80.55 |      | N |
| ANISOU | 1843 | N   | SER | D | 69 | 8846   | 10792  | 10969  | -1858 | 579   | 1011 | N |
| ATOM   | 1844 | CA  | SER | D | 69 | 82.435 | 26.310 | 9.838  | 1.00  | 84.87 |      | C |
| ANISOU | 1844 | CA  | SER | D | 69 | 9515   | 11242  | 11489  | -1854 | 547   | 999  | C |
| ATOM   | 1845 | CB  | SER | D | 69 | 83.958 | 26.219 | 9.741  | 1.00  | 87.48 |      | C |
| ANISOU | 1845 | CB  | SER | D | 69 | 9680   | 11927  | 11630  | -1750 | 484   | 1062 | C |
| ATOM   | 1846 | OG  | SER | D | 69 | 84.537 | 27.515 | 9.685  | 1.00  | 88.56 |      | O |
| ANISOU | 1846 | OG  | SER | D | 69 | 9668   | 12258  | 11722  | -1928 | 512   | 1220 | O |
| ATOM   | 1847 | C   | SER | D | 69 | 82.026 | 27.192 | 11.017 | 1.00  | 76.53 |      | C |
| ANISOU | 1847 | C   | SER | D | 69 | 8585   | 9944   | 10548  | -2124 | 608   | 1081 | C |

|        |      |     |     |   |    |        |        |        |       |        |      |   |
|--------|------|-----|-----|---|----|--------|--------|--------|-------|--------|------|---|
| ATOM   | 1848 | O   | SER | D | 69 | 81.669 | 26.692 | 12.082 | 1.00  | 73.22  | O    |   |
| ANISOU | 1848 | O   | SER | D | 69 | 8362   | 9254   | 10205  | -2155 | 611    | 1025 | O |
| ATOM   | 1849 | N   | VAL | D | 70 | 82.106 | 28.503 | 10.814 | 1.00  | 73.32  | N    |   |
| ANISOU | 1849 | N   | VAL | D | 70 | 8064   | 9643   | 10151  | -2317 | 655    | 1214 | N |
| ATOM   | 1850 | CA  | VAL | D | 70 | 81.702 | 29.492 | 11.811 | 1.00  | 72.30  | C    |   |
| ANISOU | 1850 | CA  | VAL | D | 70 | 8034   | 9306   | 10132  | -2587 | 717    | 1304 | C |
| ATOM   | 1851 | CB  | VAL | D | 70 | 81.941 | 30.925 | 11.304 | 1.00  | 74.58  | C    |   |
| ANISOU | 1851 | CB  | VAL | D | 70 | 8147   | 9789   | 10399  | -2766 | 758    | 1453 | C |
| ATOM   | 1852 | CG1 | VAL | D | 70 | 81.316 | 31.934 | 12.246 | 1.00  | 66.66  | C    |   |
| ANISOU | 1852 | CG1 | VAL | D | 70 | 7260   | 8539   | 9531   | -3045 | 829    | 1533 | C |
| ATOM   | 1853 | CG2 | VAL | D | 70 | 83.424 | 31.181 | 11.100 | 1.00  | 82.93  | C    |   |
| ANISOU | 1853 | CG2 | VAL | D | 70 | 9011   | 11223  | 11275  | -2713 | 708    | 1549 | C |
| ATOM   | 1854 | C   | VAL | D | 70 | 80.235 | 29.381 | 12.207 | 1.00  | 72.95  | C    |   |
| ANISOU | 1854 | C   | VAL | D | 70 | 8321   | 8992   | 10404  | -2681 | 775    | 1225 | C |
| ATOM   | 1855 | O   | VAL | D | 70 | 79.881 | 29.446 | 13.387 | 1.00  | 72.64  | O    |   |
| ANISOU | 1855 | O   | VAL | D | 70 | 8455   | 8688   | 10456  | -2813 | 802    | 1227 | O |
| ATOM   | 1856 | N   | GLU | D | 71 | 79.374 | 29.208 | 11.211 | 1.00  | 77.35  | N    |   |
| ANISOU | 1856 | N   | GLU | D | 71 | 8860   | 9508   | 11022  | -2611 | 793    | 1156 | N |
| ATOM   | 1857 | CA  | GLU | D | 71 | 77.945 | 29.135 | 11.480 | 1.00  | 78.16  | C    |   |
| ANISOU | 1857 | CA  | GLU | D | 71 | 9146   | 9245   | 11307  | -2697 | 849    | 1082 | C |
| ATOM   | 1858 | CB  | GLU | D | 71 | 77.128 | 29.474 | 10.232 | 1.00  | 75.12  | C    |   |
| ANISOU | 1858 | CB  | GLU | D | 71 | 8675   | 8888   | 10979  | -2687 | 883    | 1064 | C |
| ATOM   | 1859 | CG  | GLU | D | 71 | 76.988 | 28.367 | 9.204  | 1.00  | 79.10  | C    |   |
| ANISOU | 1859 | CG  | GLU | D | 71 | 9143   | 9477   | 11436  | -2424 | 835    | 937  | C |
| ATOM   | 1860 | CD  | GLU | D | 71 | 75.961 | 28.758 | 8.154  | 1.00  | 82.56  | C    |   |
| ANISOU | 1860 | CD  | GLU | D | 71 | 9538   | 9866   | 11966  | -2451 | 880    | 916  | C |
| ATOM   | 1861 | OE1 | GLU | D | 71 | 75.364 | 27.887 | 7.470  | 1.00  | 105.25 | O    |   |
| ANISOU | 1861 | OE1 | GLU | D | 71 | 12448  | 12676  | 14866  | -2281 | 863    | 795  | O |
| ATOM   | 1862 | OE2 | GLU | D | 71 | 75.723 | 29.974 | 8.053  | 1.00  | 74.51  | O    |   |
| ANISOU | 1862 | OE2 | GLU | D | 71 | 8454   | 8859   | 10997  | -2654 | 935    | 1023 | O |
| ATOM   | 1863 | C   | GLU | D | 71 | 77.601 | 27.741 | 11.981 | 1.00  | 79.05  | C    |   |
| ANISOU | 1863 | C   | GLU | D | 71 | 9441   | 9143   | 11451  | -2532 | 813    | 933  | C |
| ATOM   | 1864 | O   | GLU | D | 71 | 76.494 | 27.493 | 12.450 | 1.00  | 83.14  | O    |   |
| ANISOU | 1864 | O   | GLU | D | 71 | 10144  | 9329   | 12117  | -2591 | 851    | 860  | O |
| ATOM   | 1865 | N   | THR | D | 72 | 78.571 | 26.839 | 11.901 | 1.00  | 74.20  | N    |   |
| ANISOU | 1865 | N   | THR | D | 72 | 8775   | 8720   | 10697  | -2326 | 738    | 889  | N |
| ATOM   | 1866 | CA  | THR | D | 72 | 78.379 | 25.485 | 12.379 | 1.00  | 74.85  | C    |   |
| ANISOU | 1866 | CA  | THR | D | 72 | 9020   | 8627   | 10793  | -2158 | 695    | 751  | C |
| ATOM   | 1867 | CB  | THR | D | 72 | 79.035 | 24.461 | 11.428 | 1.00  | 75.54  | C    |   |
| ANISOU | 1867 | CB  | THR | D | 72 | 8992   | 8968   | 10741  | -1872 | 618    | 671  | C |
| ATOM   | 1868 | OG1 | THR | D | 72 | 78.342 | 24.469 | 10.172 | 1.00  | 75.81  | O    |   |
| ANISOU | 1868 | OG1 | THR | D | 72 | 8949   | 9046   | 10808  | -1799 | 635    | 626  | O |
| ATOM   | 1869 | CG2 | THR | D | 72 | 78.974 | 23.069 | 12.008 | 1.00  | 79.32  | C    |   |
| ANISOU | 1869 | CG2 | THR | D | 72 | 9636   | 9282   | 11220  | -1699 | 568    | 536  | C |
| ATOM   | 1870 | C   | THR | D | 72 | 78.929 | 25.341 | 13.800 | 1.00  | 74.71  | C    |   |
| ANISOU | 1870 | C   | THR | D | 72 | 9124   | 8500   | 10762  | -2231 | 679    | 778  | C |
| ATOM   | 1871 | O   | THR | D | 72 | 78.295 | 24.709 | 14.644 | 1.00  | 73.96  | O    |   |
| ANISOU | 1871 | O   | THR | D | 72 | 9235   | 8103   | 10763  | -2237 | 686    | 693  | O |
| ATOM   | 1872 | N   | ALA | D | 73 | 80.073 | 25.948 | 14.070 | 1.00  | 75.01  | N    |   |
| ANISOU | 1872 | N   | ALA | D | 73 | 9038   | 8776   | 10687  | -2293 | 661    | 895  | N |
| ATOM   | 1873 | CA  | ALA | D | 73 | 80.659 | 25.892 | 15.402 | 1.00  | 78.01  | C    |   |
| ANISOU | 1873 | CA  | ALA | D | 73 | 9521   | 9071   | 11048  | -2371 | 647    | 932  | C |
| ATOM   | 1874 | CB  | ALA | D | 73 | 82.050 | 26.507 | 15.395 | 1.00  | 76.89  | C    |   |
| ANISOU | 1874 | CB  | ALA | D | 73 | 9196   | 9265   | 10752  | -2397 | 616    | 1060 | C |
| ATOM   | 1875 | C   | ALA | D | 73 | 79.779 | 26.571 | 16.459 | 1.00  | 80.40  | C    |   |
| ANISOU | 1875 | C   | ALA | D | 73 | 9998   | 9038   | 11512  | -2622 | 719    | 968  | C |
| ATOM   | 1876 | O   | ALA | D | 73 | 79.683 | 26.104 | 17.594 | 1.00  | 82.10  | O    |   |
| ANISOU | 1876 | O   | ALA | D | 73 | 10389  | 9030   | 11773  | -2652 | 713    | 929  | O |
| ATOM   | 1877 | N   | THR | D | 74 | 79.154 | 27.684 | 16.080 | 1.00  | 71.68  | N    |   |
| ANISOU | 1877 | N   | THR | D | 74 | 10464  | 7172   | 9601   | -645  | -890   | 1040 | N |
| ATOM   | 1878 | CA  | THR | D | 74 | 78.332 | 28.479 | 16.990 | 1.00  | 72.93  | C    |   |
| ANISOU | 1878 | CA  | THR | D | 74 | 10823  | 7194   | 9691   | -669  | -1034  | 1041 | C |
| ATOM   | 1879 | CB  | THR | D | 74 | 78.143 | 29.922 | 16.469 | 1.00  | 77.15  | C    |   |

|        |      |     |     |   |    |        |        |        |      |       |      |   |
|--------|------|-----|-----|---|----|--------|--------|--------|------|-------|------|---|
| ANISOU | 1879 | CB  | THR | D | 74 | 11535  | 7726   | 10054  | -781 | -1130 | 1080 | C |
| ATOM   | 1880 | OG1 | THR | D | 74 | 77.613 | 29.878 | 15.133 | 1.00 | 77.84 |      | O |
| ANISOU | 1880 | OG1 | THR | D | 74 | 11641  | 7865   | 10070  | -731 | -1040 | 971  | O |
| ATOM   | 1881 | CG2 | THR | D | 74 | 79.470 | 30.682 | 16.476 | 1.00 | 87.47 |      | C |
| ANISOU | 1881 | CG2 | THR | D | 74 | 12791  | 9117   | 11326  | -939 | -1185 | 1253 | C |
| ATOM   | 1882 | C   | THR | D | 74 | 76.940 | 27.846 | 17.132 | 1.00 | 73.39 |      | C |
| ANISOU | 1882 | C   | THR | D | 74 | 10959  | 7153   | 9774   | -520 | -1001 | 873  | C |
| ATOM   | 1883 | O   | THR | D | 74 | 76.138 | 28.280 | 17.951 | 1.00 | 69.07 |      | O |
| ANISOU | 1883 | O   | THR | D | 74 | 10566  | 6483   | 9194   | -513 | -1105 | 851  | O |
| ATOM   | 1884 | N   | THR | D | 75 | 76.693 | 26.819 | 16.319 | 1.00 | 71.37 |      | N |
| ANISOU | 1884 | N   | THR | D | 75 | 10591  | 6951   | 9576   | -405 | -854  | 758  | N |
| ATOM   | 1885 | CA  | THR | D | 75 | 75.424 | 26.080 | 16.240 | 1.00 | 76.31 |      | C |
| ANISOU | 1885 | CA  | THR | D | 75 | 11264  | 7503   | 10228  | -254 | -794  | 589  | C |
| ATOM   | 1886 | CB  | THR | D | 75 | 74.968 | 25.458 | 17.610 | 1.00 | 75.35 |      | C |
| ANISOU | 1886 | CB  | THR | D | 75 | 11150  | 7266   | 10213  | -178 | -839  | 564  | C |
| ATOM   | 1887 | OG1 | THR | D | 75 | 74.557 | 26.481 | 18.530 | 1.00 | 72.24 |      | O |
| ANISOU | 1887 | OG1 | THR | D | 75 | 10940  | 6761   | 9745   | -250 | -1000 | 617  | O |
| ATOM   | 1888 | CG2 | THR | D | 75 | 76.114 | 24.652 | 18.235 | 1.00 | 74.82 |      | C |
| ANISOU | 1888 | CG2 | THR | D | 75 | 10880  | 7254   | 10292  | -188 | -797  | 659  | C |
| ATOM   | 1889 | C   | THR | D | 75 | 74.269 | 26.907 | 15.647 | 1.00 | 80.42 |      | C |
| ANISOU | 1889 | C   | THR | D | 75 | 11988  | 7965   | 10602  | -247 | -841  | 499  | C |
| ATOM   | 1890 | O   | THR | D | 75 | 73.101 | 26.580 | 15.849 | 1.00 | 85.02 |      | O |
| ANISOU | 1890 | O   | THR | D | 75 | 12661  | 8455   | 11187  | -141 | -838  | 375  | O |
| ATOM   | 1891 | N   | VAL | D | 76 | 74.591 | 27.953 | 14.888 | 1.00 | 75.38 |      | N |
| ANISOU | 1891 | N   | VAL | D | 76 | 11418  | 7383   | 9839   | -357 | -880  | 560  | N |
| ATOM   | 1892 | CA  | VAL | D | 76 | 73.542 | 28.777 | 14.272 | 1.00 | 72.86 |      | C |
| ANISOU | 1892 | CA  | VAL | D | 76 | 11289  | 7015   | 9379   | -357 | -924  | 482  | C |
| ATOM   | 1893 | CB  | VAL | D | 76 | 74.115 | 30.109 | 13.734 | 1.00 | 69.42 |      | C |
| ANISOU | 1893 | CB  | VAL | D | 76 | 10933  | 6633   | 8810   | -510 | -1003 | 592  | C |
| ATOM   | 1894 | CG1 | VAL | D | 76 | 73.036 | 30.888 | 12.960 | 1.00 | 63.00 |      | C |
| ANISOU | 1894 | CG1 | VAL | D | 76 | 10302  | 5781   | 7855   | -504 | -1032 | 505  | C |
| ATOM   | 1895 | CG2 | VAL | D | 76 | 74.605 | 30.955 | 14.904 | 1.00 | 80.20 |      | C |
| ANISOU | 1895 | CG2 | VAL | D | 76 | 12374  | 7938   | 10162  | -625 | -1152 | 732  | C |
| ATOM   | 1896 | C   | VAL | D | 76 | 72.869 | 27.990 | 13.141 | 1.00 | 77.34 |      | C |
| ANISOU | 1896 | C   | VAL | D | 76 | 11810  | 7626   | 9948   | -238 | -782  | 329  | C |
| ATOM   | 1897 | O   | VAL | D | 76 | 71.643 | 27.853 | 13.116 | 1.00 | 81.09 |      | O |
| ANISOU | 1897 | O   | VAL | D | 76 | 12397  | 8019   | 10396  | -145 | -782  | 204  | O |
| ATOM   | 1898 | N   | GLY | D | 77 | 73.674 | 27.462 | 12.219 | 1.00 | 83.74 |      | N |
| ANISOU | 1898 | N   | GLY | D | 77 | 12454  | 8569   | 10793  | -242 | -661  | 339  | N |
| ATOM   | 1899 | CA  | GLY | D | 77 | 73.151 | 26.654 | 11.125 | 1.00 | 77.67 |      | C |
| ANISOU | 1899 | CA  | GLY | D | 77 | 11623  | 7854   | 10034  | -136 | -516  | 201  | C |
| ATOM   | 1900 | C   | GLY | D | 77 | 72.030 | 27.205 | 10.255 | 1.00 | 72.61 |      | C |
| ANISOU | 1900 | C   | GLY | D | 77 | 11141  | 7184   | 9262   | -111 | -521  | 95   | C |
| ATOM   | 1901 | O   | GLY | D | 77 | 70.945 | 26.608 | 10.168 | 1.00 | 77.62 |      | O |
| ANISOU | 1901 | O   | GLY | D | 77 | 11820  | 7760   | 9912   | 12   | -472  | -44  | O |
| ATOM   | 1902 | N   | TYR | D | 78 | 72.300 | 28.320 | 9.577  | 1.00 | 79.68 |      | N |
| ANISOU | 1902 | N   | TYR | D | 78 | 12118  | 8126   | 10030  | -226 | -576  | 159  | N |
| ATOM   | 1903 | CA  | TYR | D | 78 | 71.316 | 28.951 | 8.703  | 1.00 | 67.17 |      | C |
| ANISOU | 1903 | CA  | TYR | D | 78 | 10685  | 6522   | 8313   | -218 | -587  | 74   | C |
| ATOM   | 1904 | CB  | TYR | D | 78 | 71.932 | 30.146 | 7.968  | 1.00 | 59.35 |      | C |
| ANISOU | 1904 | CB  | TYR | D | 78 | 9748   | 5605   | 7196   | -364 | -642  | 173  | C |
| ATOM   | 1905 | CG  | TYR | D | 78 | 72.312 | 31.304 | 8.859  | 1.00 | 60.25 |      | C |
| ANISOU | 1905 | CG  | TYR | D | 78 | 9974   | 5661   | 7256   | -488 | -805  | 309  | C |
| ATOM   | 1906 | CD1 | TYR | D | 78 | 71.352 | 31.956 | 9.636  | 1.00 | 66.17 |      | C |
| ANISOU | 1906 | CD1 | TYR | D | 78 | 10915  | 6274   | 7952   | -480 | -927  | 289  | C |
| ATOM   | 1907 | CE1 | TYR | D | 78 | 71.690 | 33.077 | 10.409 | 1.00 | 77.11 |      | C |
| ANISOU | 1907 | CE1 | TYR | D | 78 | 12412  | 7607   | 9281   | -601 | -1076 | 413  | C |
| ATOM   | 1908 | CZ  | TYR | D | 78 | 73.000 | 33.538 | 10.401 | 1.00 | 77.64 |      | C |
| ANISOU | 1908 | CZ  | TYR | D | 78 | 12397  | 7761   | 9342   | -728 | -1103 | 560  | C |
| ATOM   | 1909 | OH  | TYR | D | 78 | 73.355 | 34.654 | 11.113 | 1.00 | 81.04 |      | O |
| ANISOU | 1909 | OH  | TYR | D | 78 | 12936  | 8145   | 9710   | -850 | -1246 | 684  | O |
| ATOM   | 1910 | CE2 | TYR | D | 78 | 73.970 | 32.897 | 9.641  | 1.00 | 71.23 |      | C |
| ANISOU | 1910 | CE2 | TYR | D | 78 | 11395  | 7085   | 8583   | -735 | -985  | 583  | C |



|        |      |     |     |   |    |        |        |       |      |       |      |   |
|--------|------|-----|-----|---|----|--------|--------|-------|------|-------|------|---|
| ATOM   | 1911 | CD2 | TYR | D | 78 | 73.622 | 31.788 | 8.878 | 1.00 | 70.38 |      | C |
| ANISOU | 1911 | CD2 | TYR | D | 78 | 11179  | 7028   | 8535  | -616 | -837  | 458  | C |
| ATOM   | 1912 | C   | TYR | D | 78 | 70.737 | 28.007 | 7.659 | 1.00 | 63.88 |      | C |
| ANISOU | 1912 | C   | TYR | D | 78 | 10198  | 6157   | 7915  | -102 | -434  | -74  | C |
| ATOM   | 1913 | O   | TYR | D | 78 | 69.552 | 28.051 | 7.375 | 1.00 | 61.34 |      | O |
| ANISOU | 1913 | O   | TYR | D | 78 | 9996   | 5773   | 7537  | -30  | -433  | -189 | O |
| ATOM   | 1914 | N   | GLY | D | 79 | 71.557 | 27.135 | 7.123 | 1.00 | 63.79 |      | N |
| ANISOU | 1914 | N   | GLY | D | 79 | 9992   | 6258   | 7988  | -82  | -305  | -71  | N |
| ATOM   | 1915 | CA  | GLY | D | 79 | 71.089 | 26.223 | 6.108 | 1.00 | 70.07 |      | C |
| ANISOU | 1915 | CA  | GLY | D | 79 | 10711  | 7110   | 8803  | 21   | -153  | -207 | C |
| ATOM   | 1916 | C   | GLY | D | 79 | 71.461 | 26.511 | 4.674 | 1.00 | 70.17 |      | C |
| ANISOU | 1916 | C   | GLY | D | 79 | 10684  | 7245   | 8732  | -38  | -77   | -210 | C |
| ATOM   | 1917 | O   | GLY | D | 79 | 71.089 | 25.781 | 3.787 | 1.00 | 60.71 |      | O |
| ANISOU | 1917 | O   | GLY | D | 79 | 9424   | 6099   | 7546  | 41   | 51    | -321 | O |
| ATOM   | 1918 | N   | ASP | D | 80 | 72.193 | 27.578 | 4.434 | 1.00 | 74.19 |      | N |
| ANISOU | 1918 | N   | ASP | D | 80 | 11231  | 7803   | 9156  | -178 | -155  | -89  | N |
| ATOM   | 1919 | CA  | ASP | D | 80 | 72.646 | 27.888 | 3.098 | 1.00 | 68.93 |      | C |
| ANISOU | 1919 | CA  | ASP | D | 80 | 10521  | 7257   | 8410  | -245 | -88   | -81  | C |
| ATOM   | 1920 | CB  | ASP | D | 80 | 73.252 | 29.268 | 3.038 | 1.00 | 70.63 |      | C |
| ANISOU | 1920 | CB  | ASP | D | 80 | 10826  | 7494   | 8514  | -403 | -210  | 53   | C |
| ATOM   | 1921 | CG  | ASP | D | 80 | 74.199 | 29.526 | 4.131 | 1.00 | 76.45 |      | C |
| ANISOU | 1921 | CG  | ASP | D | 80 | 11521  | 8215   | 9312  | -477 | -298  | 195  | C |
| ATOM   | 1922 | OD1 | ASP | D | 80 | 74.258 | 28.758 | 5.082 | 1.00 | 80.36 |      | O |
| ANISOU | 1922 | OD1 | ASP | D | 80 | 11946  | 8659   | 9927  | -408 | -288  | 192  | O |
| ATOM   | 1923 | OD2 | ASP | D | 80 | 74.895 | 30.523 | 4.048 | 1.00 | 77.98 |      | O |
| ANISOU | 1923 | OD2 | ASP | D | 80 | 11754  | 8446   | 9430  | -608 | -380  | 313  | O |
| ATOM   | 1924 | C   | ASP | D | 80 | 73.657 | 26.891 | 2.600 | 1.00 | 65.07 |      | C |
| ANISOU | 1924 | C   | ASP | D | 80 | 9807   | 6891   | 8028  | -230 | 58    | -70  | C |
| ATOM   | 1925 | O   | ASP | D | 80 | 73.726 | 26.608 | 1.425 | 1.00 | 73.22 |      | O |
| ANISOU | 1925 | O   | ASP | D | 80 | 10774  | 8015   | 9031  | -222 | 169   | -127 | O |
| ATOM   | 1926 | N   | LEU | D | 81 | 74.466 | 26.399 | 3.525 | 1.00 | 76.10 |      | N |
| ANISOU | 1926 | N   | LEU | D | 81 | 11085  | 8283   | 9544  | -231 | 53    | 9    | N |
| ATOM   | 1927 | CA  | LEU | D | 81 | 75.592 | 25.504 | 3.261 | 1.00 | 74.90 |      | C |
| ANISOU | 1927 | CA  | LEU | D | 81 | 10711  | 8241   | 9507  | -228 | 175   | 47   | C |
| ATOM   | 1928 | CB  | LEU | D | 81 | 76.920 | 26.268 | 3.294 | 1.00 | 75.43 |      | C |
| ANISOU | 1928 | CB  | LEU | D | 81 | 10726  | 8384   | 9550  | -379 | 114   | 214  | C |
| ATOM   | 1929 | CG  | LEU | D | 81 | 77.224 | 27.318 | 2.234 | 1.00 | 69.64 |      | C |
| ANISOU | 1929 | CG  | LEU | D | 81 | 10056  | 7729   | 8674  | -498 | 88    | 260  | C |
| ATOM   | 1930 | CD1 | LEU | D | 81 | 78.158 | 28.365 | 2.800 | 1.00 | 78.37 |      | C |
| ANISOU | 1930 | CD1 | LEU | D | 81 | 11196  | 8843   | 9738  | -642 | -43   | 430  | C |
| ATOM   | 1931 | CD2 | LEU | D | 81 | 77.854 | 26.646 | 1.031 | 1.00 | 80.99 |      | C |
| ANISOU | 1931 | CD2 | LEU | D | 81 | 11327  | 9304   | 10143 | -492 | 248   | 227  | C |
| ATOM   | 1932 | C   | LEU | D | 81 | 75.628 | 24.360 | 4.279 | 1.00 | 73.03 |      | C |
| ANISOU | 1932 | C   | LEU | D | 81 | 10364  | 7953   | 9431  | -124 | 218   | 24   | C |
| ATOM   | 1933 | O   | LEU | D | 81 | 75.336 | 24.560 | 5.466 | 1.00 | 72.91 |      | O |
| ANISOU | 1933 | O   | LEU | D | 81 | 10427  | 7832   | 9443  | -114 | 110   | 57   | O |
| ATOM   | 1934 | N   | TYR | D | 82 | 76.001 | 23.176 | 3.799 | 1.00 | 69.43 |      | N |
| ANISOU | 1934 | N   | TYR | D | 82 | 9725   | 7573   | 9082  | -50  | 376   | -32  | N |
| ATOM   | 1935 | CA  | TYR | D | 82 | 76.140 | 21.983 | 4.624 | 1.00 | 67.65 |      | C |
| ANISOU | 1935 | CA  | TYR | D | 82 | 9368   | 7318   | 9018  | 51   | 438   | -55  | C |
| ATOM   | 1936 | CB  | TYR | D | 82 | 74.790 | 21.596 | 5.238 | 1.00 | 69.23 |      | C |
| ANISOU | 1936 | CB  | TYR | D | 82 | 9680   | 7391   | 9233  | 175  | 414   | -177 | C |
| ATOM   | 1937 | CG  | TYR | D | 82 | 73.638 | 21.483 | 4.251 | 1.00 | 69.20 |      | C |
| ANISOU | 1937 | CG  | TYR | D | 82 | 9764   | 7381   | 9146  | 250  | 481   | -330 | C |
| ATOM   | 1938 | CD1 | TYR | D | 82 | 73.427 | 20.328 | 3.507 | 1.00 | 64.66 |      | C |
| ANISOU | 1938 | CD1 | TYR | D | 82 | 9068   | 6863   | 8637  | 355  | 650   | -449 | C |
| ATOM   | 1939 | CE1 | TYR | D | 82 | 72.375 | 20.235 | 2.624 | 1.00 | 67.33 |      | C |
| ANISOU | 1939 | CE1 | TYR | D | 82 | 9488   | 7196   | 8897  | 419  | 709   | -586 | C |
| ATOM   | 1940 | CZ  | TYR | D | 82 | 71.514 | 21.306 | 2.471 | 1.00 | 69.19 |      | C |
| ANISOU | 1940 | CZ  | TYR | D | 82 | 9930   | 7371   | 8990  | 381  | 598   | -604 | C |
| ATOM   | 1941 | OH  | TYR | D | 82 | 70.457 | 21.239 | 1.591 | 1.00 | 78.30 |      | O |
| ANISOU | 1941 | OH  | TYR | D | 82 | 11168  | 8519   | 10063 | 442  | 653   | -737 | O |
| ATOM   | 1942 | CE2 | TYR | D | 82 | 71.702 | 22.454 | 3.195 | 1.00 | 60.03 |      | C |

|        |      |     |     |   |    |        |        |        |      |        |      |   |
|--------|------|-----|-----|---|----|--------|--------|--------|------|--------|------|---|
| ANISOU | 1942 | CE2 | TYR | D | 82 | 8893   | 6152   | 7765   | 279  | 432    | -490 | C |
| ATOM   | 1943 | CD2 | TYR | D | 82 | 72.754 | 22.536 | 4.078  | 1.00 | 67.64  |      | C |
| ANISOU | 1943 | CD2 | TYR | D | 82 | 9774   | 7121   | 8805   | 214  | 375    | -355 | C |
| ATOM   | 1944 | C   | TYR | D | 82 | 76.715 | 20.809 | 3.830  | 1.00 | 74.29  |      | C |
| ANISOU | 1944 | C   | TYR | D | 82 | 10000  | 8269   | 9960   | 109  | 624    | -104 | C |
| ATOM   | 1945 | O   | TYR | D | 82 | 76.559 | 20.734 | 2.614  | 1.00 | 77.60  |      | O |
| ANISOU | 1945 | O   | TYR | D | 82 | 10402  | 8763   | 10321  | 112  | 719    | -174 | O |
| ATOM   | 1946 | N   | PRO | D | 83 | 77.370 | 19.867 | 4.523  | 1.00 | 81.24  |      | N |
| ANISOU | 1946 | N   | PRO | D | 83 | 10716  | 9156   | 10993  | 154  | 678    | -69  | N |
| ATOM   | 1947 | CA  | PRO | D | 83 | 77.937 | 18.697 | 3.848  | 1.00 | 87.87  |      | C |
| ANISOU | 1947 | CA  | PRO | D | 83 | 11350  | 10096  | 11942  | 213  | 858    | -113 | C |
| ATOM   | 1948 | CB  | PRO | D | 83 | 78.853 | 18.114 | 4.927  | 1.00 | 85.89  |      | C |
| ANISOU | 1948 | CB  | PRO | D | 83 | 10955  | 9838   | 11841  | 215  | 850    | -13  | C |
| ATOM   | 1949 | CG  | PRO | D | 83 | 78.088 | 18.395 | 6.174  | 1.00 | 80.43  |      | C |
| ANISOU | 1949 | CG  | PRO | D | 83 | 10402  | 9009   | 11149  | 249  | 716    | -15  | C |
| ATOM   | 1950 | CD  | PRO | D | 83 | 77.738 | 19.857 | 5.950  | 1.00 | 79.69  |      | C |
| ANISOU | 1950 | CD  | PRO | D | 83 | 10509  | 8888   | 10883  | 143  | 579    | 27   | C |
| ATOM   | 1951 | C   | PRO | D | 83 | 76.881 | 17.685 | 3.406  | 1.00 | 84.82  |      | C |
| ANISOU | 1951 | C   | PRO | D | 83 | 10954  | 9685   | 11590  | 362  | 980    | -291 | C |
| ATOM   | 1952 | O   | PRO | D | 83 | 75.843 | 17.551 | 4.056  | 1.00 | 87.07  |      | O |
| ANISOU | 1952 | O   | PRO | D | 83 | 11349  | 9860   | 11875  | 446  | 930    | -368 | O |
| ATOM   | 1953 | N   | VAL | D | 84 | 77.127 | 17.036 | 2.270  | 1.00 | 88.15  |      | N |
| ANISOU | 1953 | N   | VAL | D | 84 | 11254  | 10208  | 12030  | 390  | 1138   | -356 | N |
| ATOM   | 1954 | CA  | VAL | D | 84 | 76.247 | 15.990 | 1.744  | 1.00 | 91.02  |      | C |
| ANISOU | 1954 | CA  | VAL | D | 84 | 11585  | 10566  | 12433  | 527  | 1275   | -522 | C |
| ATOM   | 1955 | CB  | VAL | D | 84 | 75.724 | 16.337 | 0.350  | 1.00 | 83.52  |      | C |
| ANISOU | 1955 | CB  | VAL | D | 84 | 10703  | 9675   | 11354  | 510  | 1336   | -610 | C |
| ATOM   | 1956 | CG1 | VAL | D | 84 | 74.795 | 17.539 | 0.421  | 1.00 | 83.40  |      | C |
| ANISOU | 1956 | CG1 | VAL | D | 84 | 10923  | 9581   | 11184  | 467  | 1189   | -619 | C |
| ATOM   | 1957 | CG2 | VAL | D | 84 | 76.877 | 16.570 | -0.595 | 1.00 | 88.15  |      | C |
| ANISOU | 1957 | CG2 | VAL | D | 84 | 11175  | 10397  | 11923  | 404  | 1402   | -531 | C |
| ATOM   | 1958 | C   | VAL | D | 84 | 76.936 | 14.633 | 1.674  | 1.00 | 92.49  |      | C |
| ANISOU | 1958 | C   | VAL | D | 84 | 11544  | 10817  | 12783  | 599  | 1436   | -542 | C |
| ATOM   | 1959 | O   | VAL | D | 84 | 76.293 | 13.613 | 1.431  | 1.00 | 88.50  |      | O |
| ANISOU | 1959 | O   | VAL | D | 84 | 10989  | 10301  | 12337  | 723  | 1554   | -673 | O |
| ATOM   | 1960 | N   | THR | D | 85 | 78.252 | 14.642 | 1.858  | 1.00 | 95.23  |      | N |
| ANISOU | 1960 | N   | THR | D | 85 | 11752  | 11233  | 13198  | 519  | 1442   | -410 | N |
| ATOM   | 1961 | CA  | THR | D | 85 | 79.073 | 13.437 | 1.783  | 1.00 | 101.97 |      | C |
| ANISOU | 1961 | CA  | THR | D | 85 | 12378  | 12157  | 14209  | 570  | 1590   | -407 | C |
| ATOM   | 1962 | CB  | THR | D | 85 | 80.416 | 13.753 | 1.090  | 1.00 | 99.46  |      | C |
| ANISOU | 1962 | CB  | THR | D | 85 | 11937  | 11966  | 13888  | 450  | 1632   | -293 | C |
| ATOM   | 1963 | OG1 | THR | D | 85 | 81.204 | 14.609 | 1.922  | 1.00 | 107.22 |      | O |
| ANISOU | 1963 | OG1 | THR | D | 85 | 12945  | 12932  | 14860  | 339  | 1487   | -130 | O |
| ATOM   | 1964 | CG2 | THR | D | 85 | 80.172 | 14.452 | -0.223 | 1.00 | 92.07  |      | C |
| ANISOU | 1964 | CG2 | THR | D | 85 | 11083  | 11095  | 12802  | 386  | 1655   | -336 | C |
| ATOM   | 1965 | C   | THR | D | 85 | 79.332 | 12.810 | 3.169  | 1.00 | 101.21 |      | C |
| ANISOU | 1965 | C   | THR | D | 85 | 12206  | 11990  | 14258  | 626  | 1553   | -355 | C |
| ATOM   | 1966 | O   | THR | D | 85 | 79.255 | 13.489 | 4.194  | 1.00 | 92.50  |      | O |
| ANISOU | 1966 | O   | THR | D | 85 | 11207  | 10806  | 13132  | 583  | 1399   | -276 | O |
| ATOM   | 1967 | N   | LEU | D | 86 | 79.610 | 11.507 | 3.186  | 1.00 | 102.24 |      | N |
| ANISOU | 1967 | N   | LEU | D | 86 | 12159  | 12151  | 14538  | 721  | 1697   | -404 | N |
| ATOM   | 1968 | CA  | LEU | D | 86 | 79.822 | 10.769 | 4.433  | 1.00 | 106.69 |      | C |
| ANISOU | 1968 | CA  | LEU | D | 86 | 12635  | 12652  | 15250  | 786  | 1681   | -368 | C |
| ATOM   | 1969 | CB  | LEU | D | 86 | 79.939 | 9.272  | 4.122  | 1.00 | 109.22 |      | C |
| ANISOU | 1969 | CB  | LEU | D | 86 | 12767  | 13016  | 15717  | 904  | 1871   | -458 | C |
| ATOM   | 1970 | CG  | LEU | D | 86 | 80.233 | 8.237  | 5.217  | 1.00 | 106.65 |      | C |
| ANISOU | 1970 | CG  | LEU | D | 86 | 12308  | 12647  | 15569  | 988  | 1899   | -437 | C |
| ATOM   | 1971 | CD1 | LEU | D | 86 | 79.137 | 8.175  | 6.262  | 1.00 | 98.89  |      | C |
| ANISOU | 1971 | CD1 | LEU | D | 86 | 11458  | 11528  | 14588  | 1072 | 1803   | -499 | C |
| ATOM   | 1972 | CD2 | LEU | D | 86 | 80.477 | 6.862  | 4.638  | 1.00 | 125.11 |      | C |
| ANISOU | 1972 | CD2 | LEU | D | 86 | 14452  | 15051  | 18036  | 1086 | 2102   | -520 | C |
| ATOM   | 1973 | C   | LEU | D | 86 | 81.053 | 11.232 | 5.228  | 1.00 | 106.96 |      | C |
| ANISOU | 1973 | C   | LEU | D | 86 | 12599  | 12705  | 15335  | 677  | 1587   | -184 | C |

|        |      |     |     |   |    |        |        |       |                |   |
|--------|------|-----|-----|---|----|--------|--------|-------|----------------|---|
| ATOM   | 1974 | O   | LEU | D | 86 | 81.098 | 11.087 | 6.448 | 1.00111.47     | O |
| ANISOU | 1974 | O   | LEU | D | 86 | 13169  | 13201  | 15983 | 697 1505 -130  | O |
| ATOM   | 1975 | N   | TRP | D | 87 | 82.035 | 11.791 | 4.536 | 1.00107.36     | N |
| ANISOU | 1975 | N   | TRP | D | 87 | 12594  | 12858  | 15341 | 560 1598 -88   | N |
| ATOM   | 1976 | CA  | TRP | D | 87 | 83.190 | 12.324 | 5.235 | 1.00113.13     | C |
| ANISOU | 1976 | CA  | TRP | D | 87 | 13269  | 13610  | 16105 | 448 1503 89    | C |
| ATOM   | 1977 | CB  | TRP | D | 87 | 84.473 | 12.217 | 4.408 | 1.00125.77     | C |
| ANISOU | 1977 | CB  | TRP | D | 87 | 14700  | 15346  | 17739 | 369 1601 170   | C |
| ATOM   | 1978 | CG  | TRP | D | 87 | 84.982 | 10.805 | 4.202 | 1.00139.37     | C |
| ANISOU | 1978 | CG  | TRP | D | 87 | 16199  | 17126  | 19629 | 458 1779 130   | C |
| ATOM   | 1979 | CD1 | TRP | D | 87 | 84.738 | 10.002 | 3.138 | 1.00147.90     | C |
| ANISOU | 1979 | CD1 | TRP | D | 87 | 17196  | 18267  | 20732 | 532 1950 7     | C |
| ATOM   | 1980 | NE1 | TRP | D | 87 | 85.351 | 8.796  | 3.309 | 1.00145.69     | N |
| ANISOU | 1980 | NE1 | TRP | D | 87 | 16711  | 18023  | 20624 | 601 2080 8     | N |
| ATOM   | 1981 | CE2 | TRP | D | 87 | 86.016 | 8.801  | 4.502 | 1.00147.04     | C |
| ANISOU | 1981 | CE2 | TRP | D | 87 | 16825  | 18158  | 20886 | 572 1992 136   | C |
| ATOM   | 1982 | CD2 | TRP | D | 87 | 85.806 | 10.047 | 5.092 | 1.00145.13     | C |
| ANISOU | 1982 | CD2 | TRP | D | 87 | 16762  | 17856  | 20526 | 482 1803 214   | C |
| ATOM   | 1983 | CE3 | TRP | D | 87 | 86.381 | 10.305 | 6.336 | 1.00152.02     | C |
| ANISOU | 1983 | CE3 | TRP | D | 87 | 17619  | 18683  | 21459 | 433 1682 350   | C |
| ATOM   | 1984 | CZ3 | TRP | D | 87 | 87.137 | 9.331  | 6.928 | 1.00158.46     | C |
| ANISOU | 1984 | CZ3 | TRP | D | 87 | 18243  | 19515  | 22448 | 476 1752 403   | C |
| ATOM   | 1985 | CH2 | TRP | D | 87 | 87.328 | 8.104  | 6.317 | 1.00162.57     | C |
| ANISOU | 1985 | CH2 | TRP | D | 87 | 18588  | 20095  | 23085 | 567 1940 323   | C |
| ATOM   | 1986 | CZ2 | TRP | D | 87 | 86.776 | 7.818  | 5.103 | 1.00155.89     | C |
| ANISOU | 1986 | CZ2 | TRP | D | 87 | 17753  | 19294  | 22183 | 616 2063 188   | C |
| ATOM   | 1987 | C   | TRP | D | 87 | 82.925 | 13.774 | 5.651 | 1.00108.42     | C |
| ANISOU | 1987 | C   | TRP | D | 87 | 12877  | 12955  | 15363 | 341 1311 166   | C |
| ATOM   | 1988 | O   | TRP | D | 87 | 83.147 | 14.135 | 6.794 | 1.00108.42     | O |
| ANISOU | 1988 | O   | TRP | D | 87 | 12915  | 12892  | 15390 | 304 1186 263   | O |
| ATOM   | 1989 | N   | GLY | D | 88 | 82.414 | 14.592 | 4.736 | 1.00 97.55     | N |
| ANISOU | 1989 | N   | GLY | D | 88 | 11700  | 11912  | 13451 | 1940 53 -772   | N |
| ATOM   | 1990 | CA  | GLY | D | 88 | 82.102 | 15.981 | 5.027 | 1.00 91.85     | C |
| ANISOU | 1990 | CA  | GLY | D | 88 | 10895  | 11288  | 12715 | 1714 -21 -847  | C |
| ATOM   | 1991 | C   | GLY | D | 88 | 81.190 | 16.120 | 6.235 | 1.00 91.11     | C |
| ANISOU | 1991 | C   | GLY | D | 88 | 10903  | 11087  | 12628 | 1554 3 -878    | C |
| ATOM   | 1992 | O   | GLY | D | 88 | 81.322 | 17.063 | 7.017 | 1.00 86.90     | O |
| ANISOU | 1992 | O   | GLY | D | 88 | 10302  | 10694  | 12021 | 1408 -63 -857  | O |
| ATOM   | 1993 | N   | ARG | D | 89 | 80.246 | 15.197 | 6.373 | 1.00 91.84     | N |
| ANISOU | 1993 | N   | ARG | D | 89 | 11158  | 10925  | 12810 | 1582 97 -929   | N |
| ATOM   | 1994 | CA  | ARG | D | 89 | 79.345 | 15.211 | 7.521 | 1.00 92.50     | C |
| ANISOU | 1994 | CA  | ARG | D | 89 | 11349  | 10890  | 12907 | 1447 131 -952  | C |
| ATOM   | 1995 | CB  | ARG | D | 89 | 78.153 | 14.275 | 7.291 | 1.00 88.19     | C |
| ANISOU | 1995 | CB  | ARG | D | 89 | 10976  | 10035  | 12498 | 1469 234 -1044 | C |
| ATOM   | 1996 | CG  | ARG | D | 89 | 77.071 | 14.940 | 6.440 | 1.00 82.67     | C |
| ANISOU | 1996 | CG  | ARG | D | 89 | 10295  | 9190   | 11927 | 1319 239 -1233 | C |
| ATOM   | 1997 | CD  | ARG | D | 89 | 76.022 | 14.004 | 5.873 | 1.00 79.90     | C |
| ANISOU | 1997 | CD  | ARG | D | 89 | 10096  | 8540   | 11723 | 1365 330 -1328 | C |
| ATOM   | 1998 | NE  | ARG | D | 89 | 75.083 | 14.764 | 5.044 | 1.00 82.89     | N |
| ANISOU | 1998 | NE  | ARG | D | 89 | 10472  | 8808   | 12215 | 1213 322 -1502 | N |
| ATOM   | 1999 | CZ  | ARG | D | 89 | 73.913 | 14.313 | 4.606 | 1.00 80.87     | C |
| ANISOU | 1999 | CZ  | ARG | D | 89 | 10341  | 8284   | 12100 | 1178 388 -1618 | C |
| ATOM   | 2000 | NH1 | ARG | D | 89 | 73.518 | 13.087 | 4.908 | 1.00 84.48     | N |
| ANISOU | 2000 | NH1 | ARG | D | 89 | 10939  | 8552   | 12609 | 1286 466 -1580 | N |
| ATOM   | 2001 | NH2 | ARG | D | 89 | 73.137 | 15.098 | 3.867 | 1.00 70.19     | N |
| ANISOU | 2001 | NH2 | ARG | D | 89 | 8972   | 6856   | 10843 | 1032 373 -1770 | N |
| ATOM   | 2002 | C   | ARG | D | 89 | 80.113 | 14.862 | 8.795 | 1.00 93.07     | C |
| ANISOU | 2002 | C   | ARG | D | 89 | 11416  | 11098  | 12849 | 1508 119 -779  | C |
| ATOM   | 2003 | O   | ARG | D | 89 | 79.779 | 15.337 | 9.886 | 1.00 85.25     | O |
| ANISOU | 2003 | O   | ARG | D | 89 | 10449  | 10131  | 11813 | 1372 103 -767  | O |
| ATOM   | 2004 | N   | CYS | D | 90 | 81.162 | 14.058 | 8.648 | 1.00 98.09     | N |
| ANISOU | 2004 | N   | CYS | D | 90 | 12020  | 11829  | 13422 | 1714 124 -645  | N |
| ATOM   | 2005 | CA  | CYS | D | 90 | 82.014 | 13.727 | 9.783 | 1.00 97.06     | C |

|        |      |     |     |   |    |        |        |        |            |       |      |   |
|--------|------|-----|-----|---|----|--------|--------|--------|------------|-------|------|---|
| ANISOU | 2005 | CA  | CYS | D | 90 | 11870  | 11846  | 13163  | 1784       | 107   | -471 | C |
| ATOM   | 2006 | CB  | CYS | D | 90 | 82.991 | 12.600 | 9.443  | 1.00109.74 |       |      | C |
| ANISOU | 2006 | CB  | CYS | D | 90 | 13468  | 13496  | 14731  | 2034       | 138   | -338 | C |
| ATOM   | 2007 | SG  | CYS | D | 90 | 82.262 | 10.941 | 9.466  | 1.00122.36 |       |      | S |
| ANISOU | 2007 | SG  | CYS | D | 90 | 15263  | 14801  | 16426  | 2183       | 269   | -343 | S |
| ATOM   | 2008 | C   | CYS | D | 90 | 82.772 | 14.967 | 10.244 | 1.00       | 87.56 |      | C |
| ANISOU | 2008 | C   | CYS | D | 90 | 10515  | 10910  | 11843  | 1669       | -6    | -416 | C |
| ATOM   | 2009 | O   | CYS | D | 90 | 82.710 | 15.321 | 11.423 | 1.00       | 88.88 |      | O |
| ANISOU | 2009 | O   | CYS | D | 90 | 10697  | 11135  | 11938  | 1567       | -31   | -367 | O |
| ATOM   | 2010 | N   | VAL | D | 91 | 83.468 | 15.626 | 9.317  | 1.00       | 78.25 |      | N |
| ANISOU | 2010 | N   | VAL | D | 91 | 9195   | 9889   | 10648  | 1686       | -75   | -425 | N |
| ATOM   | 2011 | CA  | VAL | D | 91 | 84.207 | 16.857 | 9.622  | 1.00       | 84.34 |      | C |
| ANISOU | 2011 | CA  | VAL | D | 91 | 9811   | 10916  | 11318  | 1576       | -190  | -377 | C |
| ATOM   | 2012 | CB  | VAL | D | 91 | 84.726 | 17.554 | 8.345  | 1.00       | 77.85 |      | C |
| ANISOU | 2012 | CB  | VAL | D | 91 | 8845   | 10217  | 10516  | 1589       | -251  | -423 | C |
| ATOM   | 2013 | CG1 | VAL | D | 91 | 85.494 | 18.827 | 8.692  | 1.00       | 73.82 |      | C |
| ANISOU | 2013 | CG1 | VAL | D | 91 | 8173   | 9971   | 9904   | 1474       | -375  | -369 | C |
| ATOM   | 2014 | CG2 | VAL | D | 91 | 85.597 | 16.612 | 7.545  | 1.00       | 79.66 |      | C |
| ANISOU | 2014 | CG2 | VAL | D | 91 | 9046   | 10481  | 10741  | 1831       | -220  | -330 | C |
| ATOM   | 2015 | C   | VAL | D | 91 | 83.313 | 17.828 | 10.395 | 1.00       | 85.07 |      | C |
| ANISOU | 2015 | C   | VAL | D | 91 | 9936   | 10972  | 11415  | 1336       | -218  | -473 | C |
| ATOM   | 2016 | O   | VAL | D | 91 | 83.753 | 18.500 | 11.333 | 1.00       | 79.67 |      | O |
| ANISOU | 2016 | O   | VAL | D | 91 | 9193   | 10452  | 10625  | 1246       | -290  | -399 | O |
| ATOM   | 2017 | N   | ALA | D | 92 | 82.048 | 17.882 | 9.982  | 1.00       | 86.26 |      | N |
| ANISOU | 2017 | N   | ALA | D | 92 | 10183  | 10901  | 11690  | 1237       | -160  | -637 | N |
| ATOM   | 2018 | CA  | ALA | D | 92 | 81.039 | 18.733 | 10.601 | 1.00       | 83.63 |      | C |
| ANISOU | 2018 | CA  | ALA | D | 92 | 9898   | 10497  | 11383  | 1013       | -169  | -744 | C |
| ATOM   | 2019 | CB  | ALA | D | 92 | 79.725 | 18.601 | 9.857  | 1.00       | 78.39 |      | C |
| ANISOU | 2019 | CB  | ALA | D | 92 | 9335   | 9576   | 10876  | 946        | -95   | -919 | C |
| ATOM   | 2020 | C   | ALA | D | 92 | 80.846 | 18.405 | 12.083 | 1.00       | 82.98 |      | C |
| ANISOU | 2020 | C   | ALA | D | 92 | 9909   | 10389  | 11231  | 981        | -145  | -661 | C |
| ATOM   | 2021 | O   | ALA | D | 92 | 80.848 | 19.300 | 12.934 | 1.00       | 76.53 |      | O |
| ANISOU | 2021 | O   | ALA | D | 92 | 9060   | 9681   | 10339  | 833        | -207  | -650 | O |
| ATOM   | 2022 | N   | VAL | D | 93 | 80.673 | 17.118 | 12.376 | 1.00       | 82.38 |      | N |
| ANISOU | 2022 | N   | VAL | D | 93 | 9952   | 10167  | 11181  | 1121       | -54   | -603 | N |
| ATOM   | 2023 | CA  | VAL | D | 93 | 80.451 | 16.661 | 13.739 | 1.00       | 83.17 |      | C |
| ANISOU | 2023 | CA  | VAL | D | 93 | 10153  | 10223  | 11225  | 1110       | -18   | -522 | C |
| ATOM   | 2024 | CB  | VAL | D | 93 | 80.351 | 15.135 | 13.798 | 1.00       | 84.51 |      | C |
| ANISOU | 2024 | CB  | VAL | D | 93 | 10442  | 10230  | 11439  | 1295       | 84    | -459 | C |
| ATOM   | 2025 | CG1 | VAL | D | 93 | 80.183 | 14.667 | 15.235 | 1.00       | 77.15 |      | C |
| ANISOU | 2025 | CG1 | VAL | D | 93 | 9605   | 9266   | 10443  | 1289       | 120   | -366 | C |
| ATOM   | 2026 | CG2 | VAL | D | 93 | 79.182 | 14.659 | 12.958 | 1.00       | 87.79 |      | C |
| ANISOU | 2026 | CG2 | VAL | D | 93 | 10965  | 10375  | 12018  | 1289       | 169   | -605 | C |
| ATOM   | 2027 | C   | VAL | D | 93 | 81.587 | 17.135 | 14.638 | 1.00       | 89.09 |      | C |
| ANISOU | 2027 | C   | VAL | D | 93 | 10803  | 11236  | 11813  | 1110       | -109  | -373 | C |
| ATOM   | 2028 | O   | VAL | D | 93 | 81.355 | 17.598 | 15.761 | 1.00       | 96.84 |      | O |
| ANISOU | 2028 | O   | VAL | D | 93 | 11816  | 12252  | 12729  | 990        | -132  | -351 | O |
| ATOM   | 2029 | N   | VAL | D | 94 | 82.813 | 17.060 | 14.123 | 1.00       | 86.30 |      | N |
| ANISOU | 2029 | N   | VAL | D | 94 | 10326  | 11069  | 11397  | 1240       | -163  | -272 | N |
| ATOM   | 2030 | CA  | VAL | D | 94 | 83.979 | 17.512 | 14.874 | 1.00       | 79.96 |      | C |
| ANISOU | 2030 | CA  | VAL | D | 94 | 9413   | 10524  | 10442  | 1248       | -258  | -123 | C |
| ATOM   | 2031 | CB  | VAL | D | 94 | 85.306 | 17.126 | 14.179 | 1.00       | 74.52 |      | C |
| ANISOU | 2031 | CB  | VAL | D | 94 | 8604   | 10005  | 9705   | 1436       | -294  | 1    | C |
| ATOM   | 2032 | CG1 | VAL | D | 94 | 86.464 | 17.937 | 14.734 | 1.00       | 58.34 |      | C |
| ANISOU | 2032 | CG1 | VAL | D | 94 | 6411   | 8240   | 7515   | 1402       | -415  | 128  | C |
| ATOM   | 2033 | CG2 | VAL | D | 94 | 85.562 | 15.622 | 14.296 | 1.00       | 67.86 |      | C |
| ANISOU | 2033 | CG2 | VAL | D | 94 | 7850   | 9066   | 8869   | 1648       | -202  | 103  | C |
| ATOM   | 2034 | C   | VAL | D | 94 | 83.902 | 19.027 | 15.050 | 1.00       | 77.82 |      | C |
| ANISOU | 2034 | C   | VAL | D | 94 | 9051   | 10386  | 10130  | 1039       | -361  | -189 | C |
| ATOM   | 2035 | O   | VAL | D | 94 | 84.143 | 19.537 | 16.140 | 1.00       | 78.38 |      | O |
| ANISOU | 2035 | O   | VAL | D | 94 | 9111   | 10571  | 10099  | 950        | -418  | -123 | O |
| ATOM   | 2036 | N   | VAL | D | 95 | 83.523 | 19.738 | 13.988 | 1.00       | 76.08 |      | N |
| ANISOU | 2036 | N   | VAL | D | 95 | 8772   | 10142  | 9992   | 957        | -382  | -324 | N |

|        |      |     |     |   |     |        |        |        |      |       |      |   |
|--------|------|-----|-----|---|-----|--------|--------|--------|------|-------|------|---|
| ATOM   | 2037 | CA  | VAL | D | 95  | 83.410 | 21.190 | 14.058 | 1.00 | 77.67 | C    |   |
| ANISOU | 2037 | CA  | VAL | D | 95  | 8884   | 10461  | 10165  | 757  | -478  | -398 | C |
| ATOM   | 2038 | CB  | VAL | D | 95  | 83.051 | 21.810 | 12.689 | 1.00 | 71.14 | C    |   |
| ANISOU | 2038 | CB  | VAL | D | 95  | 7987   | 9600   | 9442   | 700  | -491  | -543 | C |
| ATOM   | 2039 | CG1 | VAL | D | 95  | 82.772 | 23.304 | 12.827 | 1.00 | 65.67 | C    |   |
| ANISOU | 2039 | CG1 | VAL | D | 95  | 7219   | 9003   | 8729   | 478  | -581  | -632 | C |
| ATOM   | 2040 | CG2 | VAL | D | 95  | 84.168 | 21.569 | 11.691 | 1.00 | 62.54 | C    |   |
| ANISOU | 2040 | CG2 | VAL | D | 95  | 6770   | 8653   | 8338   | 866  | -526  | -466 | C |
| ATOM   | 2041 | C   | VAL | D | 95  | 82.367 | 21.603 | 15.102 | 1.00 | 81.79 | C    |   |
| ANISOU | 2041 | C   | VAL | D | 95  | 9519   | 10871  | 10687  | 580  | -457  | -468 | C |
| ATOM   | 2042 | O   | VAL | D | 95  | 82.644 | 22.463 | 15.948 | 1.00 | 75.83 | O    |   |
| ANISOU | 2042 | O   | VAL | D | 95  | 8719   | 10260  | 9832   | 461  | -540  | -429 | O |
| ATOM   | 2043 | N   | MET | D | 96  | 81.182 | 20.987 | 15.049 | 1.00 | 87.65 | N    |   |
| ANISOU | 2043 | N   | MET | D | 96  | 10407  | 11357  | 11539  | 566  | -348  | -567 | N |
| ATOM   | 2044 | CA  | MET | D | 96  | 80.118 | 21.305 | 15.998 | 1.00 | 86.32 | C    |   |
| ANISOU | 2044 | CA  | MET | D | 96  | 10354  | 11063  | 11382  | 408  | -314  | -635 | C |
| ATOM   | 2045 | CB  | MET | D | 96  | 78.842 | 20.490 | 15.726 | 1.00 | 83.72 | C    |   |
| ANISOU | 2045 | CB  | MET | D | 96  | 10178  | 10437  | 11195  | 419  | -187  | -739 | C |
| ATOM   | 2046 | CG  | MET | D | 96  | 78.193 | 20.688 | 14.373 | 1.00 | 74.09 | C    |   |
| ANISOU | 2046 | CG  | MET | D | 96  | 8945   | 9092   | 10115  | 386  | -161  | -893 | C |
| ATOM   | 2047 | SD  | MET | D | 96  | 76.815 | 19.532 | 14.121 | 1.00 | 85.51 | S    |   |
| ANISOU | 2047 | SD  | MET | D | 96  | 10578  | 10189  | 11725  | 429  | -13   | -986 | S |
| ATOM   | 2048 | CE  | MET | D | 96  | 77.440 | 18.395 | 12.901 | 1.00 | 77.41 | C    |   |
| ANISOU | 2048 | CE  | MET | D | 96  | 9531   | 9126   | 10756  | 665  | 25    | -949 | C |
| ATOM   | 2049 | C   | MET | D | 96  | 80.556 | 21.063 | 17.438 | 1.00 | 74.10 | C    |   |
| ANISOU | 2049 | C   | MET | D | 96  | 8848   | 9600   | 9705   | 426  | -330  | -494 | C |
| ATOM   | 2050 | O   | MET | D | 96  | 80.442 | 21.951 | 18.274 | 1.00 | 73.80 | O    |   |
| ANISOU | 2050 | O   | MET | D | 96  | 8804   | 9643   | 9593   | 278  | -389  | -498 | O |
| ATOM   | 2051 | N   | VAL | D | 97  | 81.055 | 19.864 | 17.718 | 1.00 | 74.64 | N    |   |
| ANISOU | 2051 | N   | VAL | D | 97  | 8963   | 9650   | 9748   | 609  | -278  | -371 | N |
| ATOM   | 2052 | CA  | VAL | D | 97  | 81.451 | 19.505 | 19.073 | 1.00 | 82.82 | C    |   |
| ANISOU | 2052 | CA  | VAL | D | 97  | 10048  | 10753  | 10668  | 642  | -282  | -233 | C |
| ATOM   | 2053 | CB  | VAL | D | 97  | 81.906 | 18.022 | 19.127 | 1.00 | 80.47 | C    |   |
| ANISOU | 2053 | CB  | VAL | D | 97  | 9806   | 10398  | 10373  | 864  | -206  | -113 | C |
| ATOM   | 2054 | CG1 | VAL | D | 97  | 82.688 | 17.735 | 20.405 | 1.00 | 77.55 | C    |   |
| ANISOU | 2054 | CG1 | VAL | D | 97  | 9440   | 10164  | 9860   | 919  | -236  | 56   | C |
| ATOM   | 2055 | CG2 | VAL | D | 97  | 80.703 | 17.098 | 19.035 | 1.00 | 79.37 | C    |   |
| ANISOU | 2055 | CG2 | VAL | D | 97  | 9825   | 9970   | 10361  | 892  | -75   | -196 | C |
| ATOM   | 2056 | C   | VAL | D | 97  | 82.565 | 20.433 | 19.582 | 1.00 | 78.54 | C    |   |
| ANISOU | 2056 | C   | VAL | D | 97  | 9373   | 10491  | 9978   | 592  | -416  | -133 | C |
| ATOM   | 2057 | O   | VAL | D | 97  | 82.548 | 20.863 | 20.736 | 1.00 | 71.74 | O    |   |
| ANISOU | 2057 | O   | VAL | D | 97  | 8543   | 9691   | 9022   | 499  | -454  | -88  | O |
| ATOM   | 2058 | N   | ALA | D | 98  | 83.488 | 20.790 | 18.693 | 1.00 | 77.87 | N    |   |
| ANISOU | 2058 | N   | ALA | D | 98  | 9140   | 10571  | 9877   | 646  | -491  | -104 | N |
| ATOM   | 2059 | CA  | ALA | D | 98  | 84.588 | 21.685 | 19.030 | 1.00 | 72.69 | C    |   |
| ANISOU | 2059 | CA  | ALA | D | 98  | 8343   | 10183  | 9091   | 602  | -625  | -8   | C |
| ATOM   | 2060 | CB  | ALA | D | 98  | 85.552 | 21.800 | 17.881 | 1.00 | 78.44 | C    |   |
| ANISOU | 2060 | CB  | ALA | D | 98  | 8918   | 11057  | 9828   | 702  | -680  | 29   | C |
| ATOM   | 2061 | C   | ALA | D | 98  | 84.083 | 23.062 | 19.433 | 1.00 | 73.11 | C    |   |
| ANISOU | 2061 | C   | ALA | D | 98  | 8378   | 10284  | 9118   | 374  | -700  | -104 | C |
| ATOM   | 2062 | O   | ALA | D | 98  | 84.602 | 23.678 | 20.358 | 1.00 | 81.14 | O    |   |
| ANISOU | 2062 | O   | ALA | D | 98  | 9358   | 11458  | 10013  | 302  | -789  | -25  | O |
| ATOM   | 2063 | N   | GLY | D | 99  | 83.075 | 23.552 | 18.730 | 1.00 | 79.63 | N    |   |
| ANISOU | 2063 | N   | GLY | D | 99  | 9229   | 10971  | 10056  | 259  | -667  | -275 | N |
| ATOM   | 2064 | CA  | GLY | D | 99  | 82.518 | 24.849 | 19.053 | 1.00 | 76.62 | C    |   |
| ANISOU | 2064 | CA  | GLY | D | 99  | 8835   | 10618  | 9659   | 40   | -731  | -377 | C |
| ATOM   | 2065 | C   | GLY | D | 99  | 81.739 | 24.801 | 20.353 | 1.00 | 72.73 | C    |   |
| ANISOU | 2065 | C   | GLY | D | 99  | 8487   | 10020  | 9128   | -51  | -687  | -382 | C |
| ATOM   | 2066 | O   | GLY | D | 99  | 81.885 | 25.679 | 21.198 | 1.00 | 73.65 | O    |   |
| ANISOU | 2066 | O   | GLY | D | 99  | 8587   | 10252  | 9145   | -176 | -769  | -361 | O |
| ATOM   | 2067 | N   | ILE | D | 100 | 80.902 | 23.776 | 20.504 | 1.00 | 70.44 | N    |   |
| ANISOU | 2067 | N   | ILE | D | 100 | 8341   | 9506   | 8918   | 14   | -560  | -409 | N |
| ATOM   | 2068 | CA  | ILE | D | 100 | 80.080 | 23.599 | 21.704 | 1.00 | 71.62 | C    |   |

|        |      |     |     |   |     |        |        |        |      |       |      |   |
|--------|------|-----|-----|---|-----|--------|--------|--------|------|-------|------|---|
| ANISOU | 2068 | CA  | ILE | D | 100 | 8638   | 9530   | 9044   | -56  | -501  | -413 | C |
| ATOM   | 2069 | CB  | ILE | D | 100 | 79.175 | 22.353 | 21.606 | 1.00 | 77.04 |      | C |
| ANISOU | 2069 | CB  | ILE | D | 100 | 9470   | 9957   | 9846   | 38   | -354  | -445 | C |
| ATOM   | 2070 | CG1 | ILE | D | 100 | 78.289 | 22.403 | 20.361 | 1.00 | 80.44 |      | C |
| ANISOU | 2070 | CG1 | ILE | D | 100 | 9909   | 10216  | 10438  | -0   | -296  | -606 | C |
| ATOM   | 2071 | CD1 | ILE | D | 100 | 77.497 | 21.120 | 20.152 | 1.00 | 79.75 |      | C |
| ANISOU | 2071 | CD1 | ILE | D | 100 | 9955   | 9877   | 10469  | 108  | -160  | -630 | C |
| ATOM   | 2072 | CG2 | ILE | D | 100 | 78.311 | 22.230 | 22.846 | 1.00 | 73.67 |      | C |
| ANISOU | 2072 | CG2 | ILE | D | 100 | 9189   | 9404   | 9396   | -39  | -294  | -447 | C |
| ATOM   | 2073 | C   | ILE | D | 100 | 80.921 | 23.466 | 22.974 | 1.00 | 81.43 |      | C |
| ANISOU | 2073 | C   | ILE | D | 100 | 9885   | 10927  | 10130  | -13  | -554  | -249 | C |
| ATOM   | 2074 | O   | ILE | D | 100 | 80.606 | 24.064 | 24.008 | 1.00 | 84.65 |      | O |
| ANISOU | 2074 | O   | ILE | D | 100 | 10346  | 11355  | 10462  | -137 | -584  | -250 | O |
| ATOM   | 2075 | N   | THR | D | 101 | 81.994 | 22.683 | 22.893 | 1.00 | 85.66 |      | N |
| ANISOU | 2075 | N   | THR | D | 101 | 10364  | 11569  | 10614  | 164  | -567  | -108 | N |
| ATOM   | 2076 | CA  | THR | D | 101 | 82.863 | 22.475 | 24.044 | 1.00 | 75.39 |      | C |
| ANISOU | 2076 | CA  | THR | D | 101 | 9061   | 10417  | 9166   | 220  | -618  | 57   | C |
| ATOM   | 2077 | CB  | THR | D | 101 | 83.932 | 21.399 | 23.753 | 1.00 | 73.23 |      | C |
| ANISOU | 2077 | CB  | THR | D | 101 | 8735   | 10222  | 8869   | 439  | -605  | 205  | C |
| ATOM   | 2078 | OG1 | THR | D | 101 | 83.308 | 20.114 | 23.634 | 1.00 | 71.79 |      | O |
| ANISOU | 2078 | OG1 | THR | D | 101 | 8673   | 9824   | 8779   | 562  | -467  | 195  | O |
| ATOM   | 2079 | CG2 | THR | D | 101 | 84.933 | 21.340 | 24.885 | 1.00 | 94.38 |      | C |
| ANISOU | 2079 | CG2 | THR | D | 101 | 11388  | 13084  | 11390  | 483  | -676  | 378  | C |
| ATOM   | 2080 | C   | THR | D | 101 | 83.552 | 23.767 | 24.453 | 1.00 | 73.70 |      | C |
| ANISOU | 2080 | C   | THR | D | 101 | 8738   | 10433  | 8832   | 92   | -767  | 89   | C |
| ATOM   | 2081 | O   | THR | D | 101 | 83.499 | 24.160 | 25.614 | 1.00 | 85.30 |      | O |
| ANISOU | 2081 | O   | THR | D | 101 | 10261  | 11949  | 10202  | 7    | -804  | 129  | O |
| ATOM   | 2082 | N   | SER | D | 102 | 84.170 | 24.438 | 23.492 | 1.00 | 69.73 |      | N |
| ANISOU | 2082 | N   | SER | D | 102 | 8086   | 10069  | 8341   | 77   | -851  | 68   | N |
| ATOM   | 2083 | CA  | SER | D | 102 | 84.874 | 25.686 | 23.765 | 1.00 | 79.09 |      | C |
| ANISOU | 2083 | CA  | SER | D | 102 | 9153   | 11477  | 9420   | -42  | -1001 | 98   | C |
| ATOM   | 2084 | CB  | SER | D | 102 | 85.443 | 26.268 | 22.469 | 1.00 | 81.33 |      | C |
| ANISOU | 2084 | CB  | SER | D | 102 | 9273   | 11879  | 9751   | -37  | -1071 | 62   | C |
| ATOM   | 2085 | OG  | SER | D | 102 | 86.363 | 25.365 | 21.881 | 1.00 | 87.33 |      | O |
| ANISOU | 2085 | OG  | SER | D | 102 | 9963   | 12702  | 10517  | 162  | -1055 | 175  | O |
| ATOM   | 2086 | C   | SER | D | 102 | 83.996 | 26.736 | 24.451 | 1.00 | 75.18 |      | C |
| ANISOU | 2086 | C   | SER | D | 102 | 8725   | 10937  | 8902   | -254 | -1030 | -10  | C |
| ATOM   | 2087 | O   | SER | D | 102 | 84.368 | 27.292 | 25.481 | 1.00 | 79.00 |      | O |
| ANISOU | 2087 | O   | SER | D | 102 | 9212   | 11544  | 9261   | -328 | -1113 | 59   | O |
| ATOM   | 2088 | N   | PHE | D | 103 | 82.835 | 27.013 | 23.877 | 1.00 | 78.96 |      | N |
| ANISOU | 2088 | N   | PHE | D | 103 | 9260   | 11241  | 9501   | -353 | -962  | -177 | N |
| ATOM   | 2089 | CA  | PHE | D | 103 | 81.953 | 28.005 | 24.464 | 1.00 | 81.81 |      | C |
| ANISOU | 2089 | CA  | PHE | D | 103 | 9686   | 11551  | 9848   | -553 | -981  | -285 | C |
| ATOM   | 2090 | CB  | PHE | D | 103 | 80.768 | 28.297 | 23.530 | 1.00 | 88.28 |      | C |
| ANISOU | 2090 | CB  | PHE | D | 103 | 10536  | 12186  | 10819  | -647 | -908  | -471 | C |
| ATOM   | 2091 | CG  | PHE | D | 103 | 81.113 | 29.189 | 22.355 | 1.00 | 79.61 |      | C |
| ANISOU | 2091 | CG  | PHE | D | 103 | 9284   | 11198  | 9767   | -707 | -991  | -546 | C |
| ATOM   | 2092 | CD1 | PHE | D | 103 | 81.223 | 30.564 | 22.520 | 1.00 | 79.71 |      | C |
| ANISOU | 2092 | CD1 | PHE | D | 103 | 9222   | 11345  | 9720   | -877 | -1106 | -593 | C |
| ATOM   | 2093 | CE1 | PHE | D | 103 | 81.529 | 31.391 | 21.450 | 1.00 | 78.11 |      | C |
| ANISOU | 2093 | CE1 | PHE | D | 103 | 8874   | 11242  | 9560   | -934 | -1181 | -660 | C |
| ATOM   | 2094 | CZ  | PHE | D | 103 | 81.713 | 30.847 | 20.196 | 1.00 | 87.74 |      | C |
| ANISOU | 2094 | CZ  | PHE | D | 103 | 10026  | 12427  | 10883  | -818 | -1139 | -683 | C |
| ATOM   | 2095 | CE2 | PHE | D | 103 | 81.595 | 29.482 | 20.014 | 1.00 | 87.90 |      | C |
| ANISOU | 2095 | CE2 | PHE | D | 103 | 10126  | 12312  | 10961  | -647 | -1024 | -640 | C |
| ATOM   | 2096 | CD2 | PHE | D | 103 | 81.292 | 28.661 | 21.086 | 1.00 | 84.12 |      | C |
| ANISOU | 2096 | CD2 | PHE | D | 103 | 9788   | 11732  | 10441  | -594 | -951  | -572 | C |
| ATOM   | 2097 | C   | PHE | D | 103 | 81.459 | 27.533 | 25.826 | 1.00 | 78.63 |      | C |
| ANISOU | 2097 | C   | PHE | D | 103 | 9440   | 11053  | 9382   | -559 | -921  | -235 | C |
| ATOM   | 2098 | O   | PHE | D | 103 | 81.191 | 28.335 | 26.718 | 1.00 | 76.67 |      | O |
| ANISOU | 2098 | O   | PHE | D | 103 | 9236   | 10841  | 9053   | -696 | -971  | -252 | O |
| ATOM   | 2099 | N   | GLY | D | 104 | 81.358 | 26.223 | 25.987 | 1.00 | 81.07 |      | N |
| ANISOU | 2099 | N   | GLY | D | 104 | 9835   | 11243  | 9727   | -404 | -814  | -170 | N |

|        |      |     |     |   |     |        |        |        |       |        |      |   |
|--------|------|-----|-----|---|-----|--------|--------|--------|-------|--------|------|---|
| ATOM   | 2100 | CA  | GLY | D | 104 | 80.916 | 25.655 | 27.244 | 1.00  | 79.43  |      | C |
| ANISOU | 2100 | CA  | GLY | D | 104 | 9774   | 10940  | 9465   | -390  | -748   | -114 | C |
| ATOM   | 2101 | C   | GLY | D | 104 | 81.936 | 25.916 | 28.329 | 1.00  | 89.12  |      | C |
| ANISOU | 2101 | C   | GLY | D | 104 | 10970  | 12373  | 10520  | -380  | -853   | 35   | C |
| ATOM   | 2102 | O   | GLY | D | 104 | 81.615 | 26.134 | 29.502 | 1.00  | 88.77  |      | O |
| ANISOU | 2102 | O   | GLY | D | 104 | 11022  | 12316  | 10392  | -452  | -856   | 58   | O |
| ATOM   | 2103 | N   | LEU | D | 105 | 83.197 | 25.859 | 27.937 | 1.00  | 90.63  |      | N |
| ANISOU | 2103 | N   | LEU | D | 105 | 11023  | 12755  | 10655  | -284  | -939   | 144  | N |
| ATOM   | 2104 | CA  | LEU | D | 105 | 84.275 | 26.100 | 28.874 | 1.00  | 80.13  |      | C |
| ANISOU | 2104 | CA  | LEU | D | 105 | 9647   | 11634  | 9164   | -268  | -1049  | 295  | C |
| ATOM   | 2105 | CB  | LEU | D | 105 | 85.579 | 25.597 | 28.258 | 1.00  | 75.93  |      | C |
| ANISOU | 2105 | CB  | LEU | D | 105 | 8978   | 11262  | 8611   | -107  | -1099  | 425  | C |
| ATOM   | 2106 | CG  | LEU | D | 105 | 86.910 | 25.966 | 28.921 | 1.00  | 88.55  |      | C |
| ANISOU | 2106 | CG  | LEU | D | 105 | 10479  | 13113  | 10054  | -87   | -1238  | 588  | C |
| ATOM   | 2107 | CD1 | LEU | D | 105 | 88.027 | 25.000 | 28.586 | 1.00  | 88.31  |      | C |
| ANISOU | 2107 | CD1 | LEU | D | 105 | 10367  | 13180  | 10006  | 116   | -1235  | 743  | C |
| ATOM   | 2108 | CD2 | LEU | D | 105 | 87.378 | 27.359 | 28.602 | 1.00  | 90.56  |      | C |
| ANISOU | 2108 | CD2 | LEU | D | 105 | 10600  | 13544  | 10263  | -226  | -1387  | 554  | C |
| ATOM   | 2109 | C   | LEU | D | 105 | 84.378 | 27.591 | 29.247 | 1.00  | 81.46  |      | C |
| ANISOU | 2109 | C   | LEU | D | 105 | 9763   | 11942  | 9248   | -458  | -1184  | 251  | C |
| ATOM   | 2110 | O   | LEU | D | 105 | 84.522 | 27.936 | 30.411 | 1.00  | 100.28 |      | O |
| ANISOU | 2110 | O   | LEU | D | 105 | 12200  | 14393  | 11510  | -518  | -1238  | 312  | O |
| ATOM   | 2111 | N   | VAL | D | 106 | 84.243 | 28.467 | 28.261 | 1.00  | 80.72  |      | N |
| ANISOU | 2111 | N   | VAL | D | 106 | 9571   | 11879  | 9220   | -554  | -1233  | 139  | N |
| ATOM   | 2112 | CA  | VAL | D | 106 | 84.283 | 29.911 | 28.482 | 1.00  | 86.23  |      | C |
| ANISOU | 2112 | CA  | VAL | D | 106 | 10213  | 12698  | 9852   | -738  | -1359  | 82   | C |
| ATOM   | 2113 | CB  | VAL | D | 106 | 84.131 | 30.666 | 27.158 | 1.00  | 86.66  |      | C |
| ANISOU | 2113 | CB  | VAL | D | 106 | 10151  | 12769  | 10009  | -812  | -1392  | -43  | C |
| ATOM   | 2114 | CG1 | VAL | D | 106 | 84.005 | 32.157 | 27.389 | 1.00  | 77.28  |      | C |
| ANISOU | 2114 | CG1 | VAL | D | 106 | 8920   | 11679  | 8765   | -1014 | -1510  | -118 | C |
| ATOM   | 2115 | CG2 | VAL | D | 106 | 85.321 | 30.368 | 26.274 | 1.00  | 84.74  |      | C |
| ANISOU | 2115 | CG2 | VAL | D | 106 | 9747   | 12680  | 9771   | -677  | -1448  | 54   | C |
| ATOM   | 2116 | C   | VAL | D | 106 | 83.163 | 30.283 | 29.466 | 1.00  | 90.04  |      | C |
| ANISOU | 2116 | C   | VAL | D | 106 | 10854  | 13045  | 10311  | -875  | -1313  | -1   | C |
| ATOM   | 2117 | O   | VAL | D | 106 | 83.269 | 31.234 | 30.254 | 1.00  | 86.95  |      | O |
| ANISOU | 2117 | O   | VAL | D | 106 | 10470  | 12753  | 9813   | -1003 | -1410  | 4    | O |
| ATOM   | 2118 | N   | THR | D | 107 | 82.087 | 29.518 | 29.406 | 1.00  | 88.44  |      | N |
| ANISOU | 2118 | N   | THR | D | 107 | 10779  | 12611  | 10212  | -843  | -1162  | -74  | N |
| ATOM   | 2119 | CA  | THR | D | 107 | 80.992 | 29.695 | 30.333 | 1.00  | 89.75  |      | C |
| ANISOU | 2119 | CA  | THR | D | 107 | 11103  | 12631  | 10366  | -948  | -1098  | -141 | C |
| ATOM   | 2120 | CB  | THR | D | 107 | 79.730 | 28.943 | 29.863 | 1.00  | 94.19  |      | C |
| ANISOU | 2120 | CB  | THR | D | 107 | 11775  | 12926  | 11085  | -923  | -932   | -249 | C |
| ATOM   | 2121 | OG1 | THR | D | 107 | 79.326 | 29.465 | 28.598 | 1.00  | 93.26  |      | O |
| ANISOU | 2121 | OG1 | THR | D | 107 | 11580  | 12764  | 11089  | -991  | -931   | -386 | O |
| ATOM   | 2122 | CG2 | THR | D | 107 | 78.561 | 29.110 | 30.810 | 1.00  | 92.09  |      | C |
| ANISOU | 2122 | CG2 | THR | D | 107 | 11674  | 12502  | 10814  | -1028 | -858   | -313 | C |
| ATOM   | 2123 | C   | THR | D | 107 | 81.454 | 29.238 | 31.700 | 1.00  | 97.14  |      | C |
| ANISOU | 2123 | C   | THR | D | 107 | 12119  | 13627  | 11164  | -887  | -1112  | 4    | C |
| ATOM   | 2124 | O   | THR | D | 107 | 81.200 | 29.879 | 32.697 | 1.00  | 103.59 |      | O |
| ANISOU | 2124 | O   | THR | D | 107 | 13007  | 14465  | 11885  | -996  | -1153  | 1    | O |
| ATOM   | 2125 | N   | ALA | D | 108 | 82.143 | 28.112 | 31.729 | 1.00  | 100.48 |      | N |
| ANISOU | 2125 | N   | ALA | D | 108 | 12528  | 14073  | 11575  | -707  | -1077  | 132  | N |
| ATOM   | 2126 | CA  | ALA | D | 108 | 82.630 | 27.545 | 32.987 | 1.00  | 107.87 |      | C |
| ANISOU | 2126 | CA  | ALA | D | 108 | 13537  | 15064  | 12386  | -630  | -1083  | 280  | C |
| ATOM   | 2127 | CB  | ALA | D | 108 | 83.318 | 26.211 | 32.736 | 1.00  | 116.72 |      | C |
| ANISOU | 2127 | CB  | ALA | D | 108 | 14631  | 16189  | 13529  | -420  | -1026  | 405  | C |
| ATOM   | 2128 | C   | ALA | D | 108 | 83.581 | 28.507 | 33.703 | 1.00  | 104.36 |      | C |
| ANISOU | 2128 | C   | ALA | D | 108 | 13022  | 14853  | 11778  | -707  | -1249  | 364  | C |
| ATOM   | 2129 | O   | ALA | D | 108 | 83.423 | 28.773 | 34.898 | 1.00  | 104.58 |      | O |
| ANISOU | 2129 | O   | ALA | D | 108 | 13146  | 14892  | 11697  | -769  | -1273  | 399  | O |
| ATOM   | 2130 | N   | ALA | D | 109 | 84.552 | 29.034 | 32.956 | 1.00  | 97.87  |      | N |
| ANISOU | 2130 | N   | ALA | D | 109 | 12034  | 14212  | 10941  | -705  | -1366  | 396  | N |
| ATOM   | 2131 | CA  | ALA | D | 109 | 85.522 | 29.979 | 33.498 | 1.00  | 103.59 |      | C |

|        |      |     |     |   |     |        |        |        |            |       |      |   |
|--------|------|-----|-----|---|-----|--------|--------|--------|------------|-------|------|---|
| ANISOU | 2131 | CA  | ALA | D | 109 | 12673  | 15166  | 11522  | -778       | -1536 | 478  | C |
| ATOM   | 2132 | CB  | ALA | D | 109 | 86.444 | 30.486 | 32.408 | 1.00105.89 |       |      | C |
| ANISOU | 2132 | CB  | ALA | D | 109 | 12772  | 15625  | 11837  | -768       | -1642 | 494  | C |
| ATOM   | 2133 | C   | ALA | D | 109 | 84.802 | 31.140 | 34.171 | 1.00104.83 |       |      | C |
| ANISOU | 2133 | C   | ALA | D | 109 | 12905  | 15302  | 11624  | -975       | -1586 | 377  | C |
| ATOM   | 2134 | O   | ALA | D | 109 | 85.239 | 31.641 | 35.204 | 1.00115.16 |       |      | O |
| ANISOU | 2134 | O   | ALA | D | 109 | 14239  | 16727  | 12791  | -1031      | -1684 | 451  | O |
| ATOM   | 2135 | N   | LEU | D | 110 | 83.698 | 31.565 | 33.569 | 1.00102.48 |       |      | N |
| ANISOU | 2135 | N   | LEU | D | 110 | 12645  | 14855  | 11439  | -1079      | -1519 | 208  | N |
| ATOM   | 2136 | CA  | LEU | D | 110 | 82.879 | 32.631 | 34.126 | 1.00106.54 |       |      | C |
| ANISOU | 2136 | CA  | LEU | D | 110 | 13239  | 15324  | 11916  | -1265      | -1546 | 98   | C |
| ATOM   | 2137 | CB  | LEU | D | 110 | 81.798 | 33.058 | 33.135 | 1.00102.34 |       |      | C |
| ANISOU | 2137 | CB  | LEU | D | 110 | 12708  | 14642  | 11534  | -1363      | -1475 | -85  | C |
| ATOM   | 2138 | CG  | LEU | D | 110 | 82.244 | 33.864 | 31.923 | 1.00       | 96.14 |      | C |
| ANISOU | 2138 | CG  | LEU | D | 110 | 11752  | 13972  | 10806  | -1419      | -1567 | -148 | C |
| ATOM   | 2139 | CD1 | LEU | D | 110 | 81.041 | 34.145 | 31.041 | 1.00103.01 |       |      | C |
| ANISOU | 2139 | CD1 | LEU | D | 110 | 12649  | 14663  | 11829  | -1509      | -1474 | -330 | C |
| ATOM   | 2140 | CD2 | LEU | D | 110 | 82.901 | 35.166 | 32.367 | 1.00       | 88.84 |      | C |
| ANISOU | 2140 | CD2 | LEU | D | 110 | 10753  | 13249  | 9755   | -1552      | -1743 | -126 | C |
| ATOM   | 2141 | C   | LEU | D | 110 | 82.236 | 32.230 | 35.450 | 1.00110.39 |       |      | C |
| ANISOU | 2141 | C   | LEU | D | 110 | 13910  | 15699  | 12336  | -1268      | -1471 | 126  | C |
| ATOM   | 2142 | O   | LEU | D | 110 | 82.070 | 33.067 | 36.337 | 1.00114.47 |       |      | O |
| ANISOU | 2142 | O   | LEU | D | 110 | 14488  | 16259  | 12747  | -1390      | -1539 | 113  | O |
| ATOM   | 2143 | N   | ALA | D | 111 | 81.844 | 30.964 | 35.569 | 1.00106.88 |       |      | N |
| ANISOU | 2143 | N   | ALA | D | 111 | 13554  | 15104  | 11952  | -1134      | -1330 | 163  | N |
| ATOM   | 2144 | CA  | ALA | D | 111 | 81.219 | 30.480 | 36.795 | 1.00111.84 |       |      | C |
| ANISOU | 2144 | CA  | ALA | D | 111 | 14355  | 15616  | 12524  | -1122      | -1247 | 196  | C |
| ATOM   | 2145 | CB  | ALA | D | 111 | 80.636 | 29.096 | 36.577 | 1.00105.09 |       |      | C |
| ANISOU | 2145 | CB  | ALA | D | 111 | 13579  | 14567  | 11784  | -980       | -1078 | 204  | C |
| ATOM   | 2146 | C   | ALA | D | 111 | 82.230 | 30.468 | 37.947 | 1.00123.69 |       |      | C |
| ANISOU | 2146 | C   | ALA | D | 111 | 15861  | 17288  | 13846  | -1080      | -1349 | 357  | C |
| ATOM   | 2147 | O   | ALA | D | 111 | 81.927 | 30.902 | 39.060 | 1.00123.91 |       |      | O |
| ANISOU | 2147 | O   | ALA | D | 111 | 15997  | 17314  | 13769  | -1159      | -1371 | 364  | O |
| ATOM   | 2148 | N   | THR | D | 112 | 83.411 | 29.956 | 37.683 | 1.00123.03 |       |      | N |
| ANISOU | 2148 | N   | THR | D | 112 | 15666  | 17349  | 13729  | -954       | -1407 | 486  | N |
| ATOM   | 2149 | CA  | THR | D | 112 | 84.387 | 29.885 | 38.731 | 1.00120.26 |       |      | C |
| ANISOU | 2149 | CA  | THR | D | 112 | 15316  | 17159  | 13217  | -909       | -1502 | 644  | C |
| ATOM   | 2150 | CB  | THR | D | 112 | 85.682 | 29.238 | 38.226 | 1.00119.10 |       |      | C |
| ANISOU | 2150 | CB  | THR | D | 112 | 15029  | 17162  | 13060  | -757       | -1553 | 785  | C |
| ATOM   | 2151 | OG1 | THR | D | 112 | 85.366 | 28.130 | 37.391 | 1.00120.92 |       |      | O |
| ANISOU | 2151 | OG1 | THR | D | 112 | 15258  | 17255  | 13431  | -623       | -1415 | 767  | O |
| ATOM   | 2152 | CG2 | THR | D | 112 | 86.499 | 28.736 | 39.359 | 1.00125.88 |       |      | C |
| ANISOU | 2152 | CG2 | THR | D | 112 | 15922  | 18128  | 13778  | -670       | -1597 | 958  | C |
| ATOM   | 2153 | C   | THR | D | 112 | 84.664 | 31.300 | 39.200 | 1.00123.55 |       |      | C |
| ANISOU | 2153 | C   | THR | D | 112 | 15705  | 17722  | 13518  | -1075      | -1660 | 620  | C |
| ATOM   | 2154 | O   | THR | D | 112 | 84.776 | 31.557 | 40.385 | 1.00137.83 |       |      | O |
| ANISOU | 2154 | O   | THR | D | 112 | 17598  | 19578  | 15192  | -1115      | -1711 | 680  | O |
| ATOM   | 2155 | N   | TRP | D | 113 | 84.744 | 32.235 | 38.269 | 1.00124.27 |       |      | N |
| ANISOU | 2155 | N   | TRP | D | 113 | 15678  | 17878  | 13660  | -1175      | -1738 | 528  | N |
| ATOM   | 2156 | CA  | TRP | D | 113 | 85.060 | 33.601 | 38.627 | 1.00126.01 |       |      | C |
| ANISOU | 2156 | CA  | TRP | D | 113 | 15859  | 18243  | 13775  | -1333      | -1897 | 506  | C |
| ATOM   | 2157 | CB  | TRP | D | 113 | 85.045 | 34.452 | 37.360 | 1.00133.69 |       |      | C |
| ANISOU | 2157 | CB  | TRP | D | 113 | 16693  | 19259  | 14843  | -1422      | -1953 | 393  | C |
| ATOM   | 2158 | CG  | TRP | D | 113 | 85.395 | 35.881 | 37.548 | 1.00137.18 |       |      | C |
| ANISOU | 2158 | CG  | TRP | D | 113 | 17073  | 19853  | 15195  | -1584      | -2121 | 362  | C |
| ATOM   | 2159 | CD1 | TRP | D | 113 | 86.291 | 36.390 | 38.424 | 1.00139.34 |       |      | C |
| ANISOU | 2159 | CD1 | TRP | D | 113 | 17328  | 20304  | 15312  | -1615      | -2270 | 475  | C |
| ATOM   | 2160 | NE1 | TRP | D | 113 | 86.364 | 37.745 | 38.290 | 1.00142.93 |       |      | N |
| ANISOU | 2160 | NE1 | TRP | D | 113 | 17722  | 20858  | 15729  | -1778      | -2403 | 403  | N |
| ATOM   | 2161 | CE2 | TRP | D | 113 | 85.510 | 38.136 | 37.296 | 1.00141.04 |       |      | C |
| ANISOU | 2161 | CE2 | TRP | D | 113 | 17457  | 20508  | 15626  | -1855      | -2337 | 241  | C |
| ATOM   | 2162 | CD2 | TRP | D | 113 | 84.894 | 36.986 | 36.799 | 1.00133.07 |       |      | C |
| ANISOU | 2162 | CD2 | TRP | D | 113 | 16496  | 19324  | 14742  | -1736      | -2162 | 212  | C |



|        |      |     |     |   |     |        |        |        |            |       |      |   |
|--------|------|-----|-----|---|-----|--------|--------|--------|------------|-------|------|---|
| ATOM   | 2163 | CE3 | TRP | D | 113 | 83.971 | 37.113 | 35.767 | 1.00126.86 |       | C    |   |
| ANISOU | 2163 | CE3 | TRP | D | 113 | 15696  | 18396  | 14108  | -1785      | -2067 | 57   | C |
| ATOM   | 2164 | CZ3 | TRP | D | 113 | 83.702 | 38.365 | 35.273 | 1.00128.11 |       | C    |   |
| ANISOU | 2164 | CZ3 | TRP | D | 113 | 15792  | 18594  | 14290  | -1948      | -2147 | -63  | C |
| ATOM   | 2165 | CH2 | TRP | D | 113 | 84.328 | 39.488 | 35.784 | 1.00130.23 |       | C    |   |
| ANISOU | 2165 | CH2 | TRP | D | 113 | 16012  | 19037  | 14432  | -2062      | -2320 | -32  | C |
| ATOM   | 2166 | CZ2 | TRP | D | 113 | 85.237 | 39.398 | 36.794 | 1.00137.38 |       | C    |   |
| ANISOU | 2166 | CZ2 | TRP | D | 113 | 16931  | 20082  | 15187  | -2018      | -2419 | 119  | C |
| ATOM   | 2167 | C   | TRP | D | 113 | 84.046 | 34.161 | 39.573 | 1.00123.97 |       | C    |   |
| ANISOU | 2167 | C   | TRP | D | 113 | 15763  | 17875  | 13464  | -1461      | -1866 | 420  | C |
| ATOM   | 2168 | O   | TRP | D | 113 | 84.407 | 34.734 | 40.586 | 1.00132.13 |       | O    |   |
| ANISOU | 2168 | O   | TRP | D | 113 | 16841  | 19011  | 14351  | -1524      | -1969 | 478  | O |
| ATOM   | 2169 | N   | PHE | D | 114 | 82.777 | 33.975 | 39.268 | 1.00125.88 |       | N    |   |
| ANISOU | 2169 | N   | PHE | D | 114 | 16099  | 17907  | 13823  | -1496      | -1724 | 288  | N |
| ATOM   | 2170 | CA  | PHE | D | 114 | 81.767 | 34.484 | 40.154 | 1.00131.38 |       | C    |   |
| ANISOU | 2170 | CA  | PHE | D | 114 | 16953  | 18490  | 14474  | -1613      | -1684 | 209  | C |
| ATOM   | 2171 | CB  | PHE | D | 114 | 80.395 | 34.382 | 39.505 | 1.00131.29 |       | C    |   |
| ANISOU | 2171 | CB  | PHE | D | 114 | 17008  | 18255  | 14622  | -1661      | -1535 | 50   | C |
| ATOM   | 2172 | CG  | PHE | D | 114 | 80.263 | 35.228 | 38.280 | 1.00122.12 |       | C    |   |
| ANISOU | 2172 | CG  | PHE | D | 114 | 15723  | 17118  | 13560  | -1763      | -1581 | -75  | C |
| ATOM   | 2173 | CD1 | PHE | D | 114 | 81.133 | 36.268 | 38.056 | 1.00128.43 |       | C    |   |
| ANISOU | 2173 | CD1 | PHE | D | 114 | 16393  | 18120  | 14285  | -1845      | -1753 | -62  | C |
| ATOM   | 2174 | CE1 | PHE | D | 114 | 81.008 | 37.063 | 36.939 | 1.00131.62 |       | C    |   |
| ANISOU | 2174 | CE1 | PHE | D | 114 | 16681  | 18548  | 14779  | -1940      | -1796 | -176 | C |
| ATOM   | 2175 | CZ  | PHE | D | 114 | 80.002 | 36.829 | 36.040 | 1.00131.41 |       | C    |   |
| ANISOU | 2175 | CZ  | PHE | D | 114 | 16671  | 18343  | 14918  | -1954      | -1668 | -307 | C |
| ATOM   | 2176 | CE2 | PHE | D | 114 | 79.115 | 35.799 | 36.258 | 1.00131.84 |       | C    |   |
| ANISOU | 2176 | CE2 | PHE | D | 114 | 16856  | 18189  | 15046  | -1875      | -1498 | -321 | C |
| ATOM   | 2177 | CD2 | PHE | D | 114 | 79.248 | 35.006 | 37.374 | 1.00127.40 |       | C    |   |
| ANISOU | 2177 | CD2 | PHE | D | 114 | 16407  | 17605  | 14395  | -1779      | -1456 | -205 | C |
| ATOM   | 2178 | C   | PHE | D | 114 | 81.868 | 33.751 | 41.477 | 1.00131.66 |       | C    |   |
| ANISOU | 2178 | C   | PHE | D | 114 | 17120  | 18506  | 14398  | -1527      | -1645 | 330  | C |
| ATOM   | 2179 | O   | PHE | D | 114 | 81.836 | 34.360 | 42.530 | 1.00136.37 |       | O    |   |
| ANISOU | 2179 | O   | PHE | D | 114 | 17803  | 19148  | 14863  | -1608      | -1710 | 349  | O |
| ATOM   | 2180 | N   | VAL | D | 115 | 82.010 | 32.437 | 41.422 | 1.00131.06 |       | N    |   |
| ANISOU | 2180 | N   | VAL | D | 115 | 17060  | 18365  | 14372  | -1361      | -1541 | 414  | N |
| ATOM   | 2181 | CA  | VAL | D | 115 | 82.126 | 31.667 | 42.640 | 1.00137.50 |       | C    |   |
| ANISOU | 2181 | CA  | VAL | D | 115 | 17995  | 19161  | 15089  | -1269      | -1499 | 534  | C |
| ATOM   | 2182 | CB  | VAL | D | 115 | 82.093 | 30.175 | 42.346 | 1.00133.66 |       | C    |   |
| ANISOU | 2182 | CB  | VAL | D | 115 | 17521  | 18566  | 14697  | -1088      | -1360 | 600  | C |
| ATOM   | 2183 | CG1 | VAL | D | 115 | 82.277 | 29.381 | 43.619 | 1.00139.31 |       | C    |   |
| ANISOU | 2183 | CG1 | VAL | D | 115 | 18352  | 19273  | 15306  | -990       | -1321 | 732  | C |
| ATOM   | 2184 | CG2 | VAL | D | 115 | 80.793 | 29.812 | 41.678 | 1.00125.77 |       | C    |   |
| ANISOU | 2184 | CG2 | VAL | D | 115 | 16588  | 17333  | 13868  | -1100      | -1200 | 463  | C |
| ATOM   | 2185 | C   | VAL | D | 115 | 83.413 | 31.985 | 43.362 | 1.00144.81 |       | C    |   |
| ANISOU | 2185 | C   | VAL | D | 115 | 18864  | 20312  | 15845  | -1254      | -1661 | 678  | C |
| ATOM   | 2186 | O   | VAL | D | 115 | 83.433 | 32.140 | 44.567 | 1.00152.60 |       | O    |   |
| ANISOU | 2186 | O   | VAL | D | 115 | 19957  | 21324  | 16699  | -1279      | -1693 | 736  | O |
| ATOM   | 2187 | N   | GLY | D | 116 | 84.496 | 32.084 | 42.610 | 1.00144.75 |       | N    |   |
| ANISOU | 2187 | N   | GLY | D | 116 | 18686  | 20469  | 15841  | -1213      | -1765 | 740  | N |
| ATOM   | 2188 | CA  | GLY | D | 116 | 85.797 | 32.360 | 43.180 | 1.00139.37 |       | C    |   |
| ANISOU | 2188 | CA  | GLY | D | 116 | 17932  | 20010  | 15011  | -1194      | -1925 | 886  | C |
| ATOM   | 2189 | C   | GLY | D | 116 | 85.930 | 33.699 | 43.856 | 1.00141.60 |       | C    |   |
| ANISOU | 2189 | C   | GLY | D | 116 | 18235  | 20404  | 15164  | -1357      | -2076 | 860  | C |
| ATOM   | 2190 | O   | GLY | D | 116 | 86.558 | 33.812 | 44.891 | 1.00156.97 |       | O    |   |
| ANISOU | 2190 | O   | GLY | D | 116 | 20220  | 22461  | 16961  | -1353      | -2168 | 971  | O |
| ATOM   | 2191 | N   | ARG | D | 117 | 85.282 | 34.702 | 43.286 | 1.00137.60 |       | N    |   |
| ANISOU | 2191 | N   | ARG | D | 117 | 17710  | 19858  | 14715  | -1503      | -2097 | 708  | N |
| ATOM   | 2192 | CA  | ARG | D | 117 | 85.298 | 36.031 | 43.855 | 1.00134.82 |       | C    |   |
| ANISOU | 2192 | CA  | ARG | D | 117 | 17382  | 19595  | 14249  | -1669      | -2235 | 664  | C |
| ATOM   | 2193 | CB  | ARG | D | 117 | 85.282 | 37.094 | 42.767 | 1.00126.17 |       | C    |   |
| ANISOU | 2193 | CB  | ARG | D | 117 | 16156  | 18556  | 13228  | -1792      | -2316 | 548  | C |
| ATOM   | 2194 | C   | ARG | D | 117 | 84.086 | 36.209 | 44.726 | 1.00135.88 |       | C    |   |

|        |      |     |     |   |     |        |        |        |            |       |      |   |
|--------|------|-----|-----|---|-----|--------|--------|--------|------------|-------|------|---|
| ANISOU | 2194 | C   | ARG | D | 117 | 17711  | 19563  | 14355  | -1746      | -2142 | 576  | C |
| ATOM   | 2195 | O   | ARG | D | 117 | 83.756 | 37.319 | 45.096 | 1.00133.05 |       |      | O |
| ANISOU | 2195 | O   | ARG | D | 117 | 17398  | 19225  | 13931  | -1895      | -2219 | 499  | O |
| ATOM   | 2196 | N   | GLU | D | 118 | 83.398 | 35.121 | 45.030 | 1.00137.90 |       |      | N |
| ANISOU | 2196 | N   | GLU | D | 118 | 18082  | 19650  | 14665  | -1643      | -1973 | 586  | N |
| ATOM   | 2197 | CA  | GLU | D | 118 | 82.242 | 35.227 | 45.890 | 1.00140.88 |       |      | C |
| ANISOU | 2197 | CA  | GLU | D | 118 | 18646  | 19865  | 15016  | -1705      | -1876 | 515  | C |
| ATOM   | 2198 | CB  | GLU | D | 118 | 81.066 | 34.416 | 45.384 | 1.00146.78 |       |      | C |
| ANISOU | 2198 | CB  | GLU | D | 118 | 19463  | 20380  | 15928  | -1654      | -1674 | 426  | C |
| ATOM   | 2199 | CG  | GLU | D | 118 | 79.897 | 34.400 | 46.359 | 1.00146.83 |       |      | C |
| ANISOU | 2199 | CG  | GLU | D | 118 | 19667  | 20216  | 15905  | -1699      | -1564 | 374  | C |
| ATOM   | 2200 | CD  | GLU | D | 118 | 79.278 | 35.767 | 46.554 | 1.00145.55 |       |      | C |
| ANISOU | 2200 | CD  | GLU | D | 118 | 19556  | 20047  | 15699  | -1886      | -1625 | 250  | C |
| ATOM   | 2201 | OE1 | GLU | D | 118 | 79.586 | 36.668 | 45.764 | 1.00141.34 |       |      | O |
| ANISOU | 2201 | OE1 | GLU | D | 118 | 18901  | 19610  | 15192  | -1983      | -1729 | 182  | O |
| ATOM   | 2202 | OE2 | GLU | D | 118 | 78.480 | 35.944 | 47.494 | 1.00161.73 |       |      | O |
| ANISOU | 2202 | OE2 | GLU | D | 118 | 21766  | 21994  | 17688  | -1934      | -1566 | 222  | O |
| ATOM   | 2203 | C   | GLU | D | 118 | 82.589 | 34.762 | 47.263 | 1.00154.40 |       |      | C |
| ANISOU | 2203 | C   | GLU | D | 118 | 20473  | 21613  | 16579  | -1636      | -1888 | 647  | C |
| ATOM   | 2204 | O   | GLU | D | 118 | 82.227 | 35.392 | 48.231 | 1.00166.72 |       |      | O |
| ANISOU | 2204 | O   | GLU | D | 118 | 22154  | 23164  | 18028  | -1725      | -1922 | 627  | O |
| ATOM   | 2205 | N   | GLN | D | 119 | 83.281 | 33.656 | 47.361 | 1.00153.92 |       |      | N |
| ANISOU | 2205 | N   | GLN | D | 119 | 20379  | 21590  | 16515  | -1476      | -1857 | 782  | N |
| ATOM   | 2206 | CA  | GLN | D | 119 | 83.633 | 33.161 | 48.660 | 1.00162.92 |       |      | C |
| ANISOU | 2206 | CA  | GLN | D | 119 | 21623  | 22764  | 17514  | -1405      | -1865 | 913  | C |
| ATOM   | 2207 | CB  | GLN | D | 119 | 84.366 | 31.834 | 48.528 | 1.00165.99 |       |      | C |
| ANISOU | 2207 | CB  | GLN | D | 119 | 21954  | 23182  | 17932  | -1217      | -1814 | 1054 | C |
| ATOM   | 2208 | CG  | GLN | D | 119 | 84.209 | 30.902 | 49.710 | 1.00171.02 |       |      | C |
| ANISOU | 2208 | CG  | GLN | D | 119 | 22734  | 23750  | 18494  | -1113      | -1726 | 1156 | C |
| ATOM   | 2209 | CD  | GLN | D | 119 | 84.625 | 29.486 | 49.379 | 1.00172.65 |       |      | C |
| ANISOU | 2209 | CD  | GLN | D | 119 | 22892  | 23930  | 18776  | -926       | -1630 | 1261 | C |
| ATOM   | 2210 | OE1 | GLN | D | 119 | 85.253 | 29.238 | 48.352 | 1.00169.26 |       |      | O |
| ANISOU | 2210 | OE1 | GLN | D | 119 | 22314  | 23569  | 18427  | -869       | -1655 | 1282 | O |
| ATOM   | 2211 | NE2 | GLN | D | 119 | 84.275 | 28.547 | 50.249 | 1.00173.11 |       |      | N |
| ANISOU | 2211 | NE2 | GLN | D | 119 | 23078  | 23888  | 18807  | -828       | -1518 | 1330 | N |
| ATOM   | 2212 | C   | GLN | D | 119 | 84.513 | 34.191 | 49.337 | 1.00169.64 |       |      | C |
| ANISOU | 2212 | C   | GLN | D | 119 | 22449  | 23815  | 18193  | -1496      | -2066 | 972  | C |
| ATOM   | 2213 | O   | GLN | D | 119 | 84.441 | 34.393 | 50.541 | 1.00178.79 |       |      | O |
| ANISOU | 2213 | O   | GLN | D | 119 | 23735  | 24983  | 19213  | -1523      | -2097 | 1016 | O |
| ATOM   | 2214 | N   | GLU | D | 120 | 85.363 | 34.842 | 48.564 | 1.00163.60 |       |      | N |
| ANISOU | 2214 | N   | GLU | D | 120 | 21518  | 23210  | 17434  | -1543      | -2207 | 978  | N |
| ATOM   | 2215 | CA  | GLU | D | 120 | 86.295 | 35.777 | 49.151 | 1.00162.00 |       |      | C |
| ANISOU | 2215 | CA  | GLU | D | 120 | 21276  | 23205  | 17073  | -1623      | -2409 | 1048 | C |
| ATOM   | 2216 | CB  | GLU | D | 120 | 87.043 | 36.554 | 48.072 | 1.00152.75 |       |      | C |
| ANISOU | 2216 | CB  | GLU | D | 120 | 19909  | 22184  | 15946  | -1686      | -2547 | 1026 | C |
| ATOM   | 2217 | C   | GLU | D | 120 | 85.454 | 36.715 | 50.007 | 1.00171.33 |       |      | C |
| ANISOU | 2217 | C   | GLU | D | 120 | 22612  | 24319  | 18165  | -1767      | -2426 | 951  | C |
| ATOM   | 2218 | O   | GLU | D | 120 | 85.839 | 37.068 | 51.108 | 1.00185.53 |       |      | O |
| ANISOU | 2218 | O   | GLU | D | 120 | 24490  | 26200  | 19803  | -1796      | -2524 | 1024 | O |
| ATOM   | 2219 | N   | ARG | D | 121 | 84.292 | 37.107 | 49.507 | 1.00166.94 |       |      | N |
| ANISOU | 2219 | N   | ARG | D | 121 | 22105  | 23609  | 17714  | -1855      | -2329 | 788  | N |
| ATOM   | 2220 | CA  | ARG | D | 121 | 83.410 | 37.979 | 50.264 | 1.00169.97 |       |      | C |
| ANISOU | 2220 | CA  | ARG | D | 121 | 22641  | 23917  | 18025  | -1989      | -2330 | 690  | C |
| ATOM   | 2221 | CB  | ARG | D | 121 | 82.205 | 38.409 | 49.434 | 1.00164.42 |       |      | C |
| ANISOU | 2221 | CB  | ARG | D | 121 | 21951  | 23054  | 17467  | -2084      | -2225 | 509  | C |
| ATOM   | 2222 | C   | ARG | D | 121 | 82.958 | 37.254 | 51.517 | 1.00175.82 |       |      | C |
| ANISOU | 2222 | C   | ARG | D | 121 | 23566  | 24556  | 18683  | -1913      | -2229 | 755  | C |
| ATOM   | 2223 | O   | ARG | D | 121 | 82.837 | 37.844 | 52.584 | 1.00185.34 |       |      | O |
| ANISOU | 2223 | O   | ARG | D | 121 | 24894  | 25781  | 19744  | -1982      | -2290 | 763  | O |
| ATOM   | 2224 | N   | ARG | D | 122 | 82.698 | 35.963 | 51.378 | 1.00174.33 |       |      | N |
| ANISOU | 2224 | N   | ARG | D | 122 | 23398  | 24254  | 18586  | -1768      | -2072 | 801  | N |
| ATOM   | 2225 | CA  | ARG | D | 122 | 82.260 | 35.160 | 52.509 | 1.00180.34 |       |      | C |
| ANISOU | 2225 | CA  | ARG | D | 122 | 24326  | 24912  | 19283  | -1682      | -1963 | 869  | C |

|        |      |     |     |       |     |        |        |        |                  |   |
|--------|------|-----|-----|-------|-----|--------|--------|--------|------------------|---|
| ATOM   | 2226 | CB  | ARG | D     | 122 | 80.953 | 34.443 | 52.181 | 1.00178.72       | C |
| ANISOU | 2226 | CB  | ARG | D     | 122 | 24206  | 24468  | 19230  | -1642 -1747 778  | C |
| ATOM   | 2227 | C   | ARG | D     | 122 | 83.324 | 34.144 | 52.912 | 1.00184.21       | C |
| ANISOU | 2227 | C   | ARG | D     | 122 | 24773  | 25506  | 19712  | -1525 -1987 1049 | C |
| ATOM   | 2228 | O   | ARG | D     | 122 | 84.268 | 34.464 | 53.636 | 1.00185.10       | O |
| ANISOU | 2228 | O   | ARG | D     | 122 | 24877  | 25782  | 19672  | -1530 -2133 1155 | O |
| TER    |      |     |     |       |     |        |        |        |                  |   |
| HETATM | 2229 | O   | HOH | D1001 |     | 74.203 | 26.458 | 7.232  | 1.00 77.55       | O |
| HETATM | 2230 | O   | HOH | D1002 |     | 77.192 | 25.300 | 25.717 | 1.00 72.41       | O |
| HETATM | 2231 | O   | HOH | D1003 |     | 75.741 | 27.014 | 22.400 | 1.00 72.64       | O |
| TER    |      |     |     |       |     |        |        |        |                  |   |
| ATOM   | 2232 | N   | SER | E     | 22  | 88.511 | 10.203 | 39.520 | 1.00171.95       | N |
| ANISOU | 2232 | N   | SER | E     | 22  | 22805  | 22494  | 20035  | -660 -1614 2742  | N |
| ATOM   | 2233 | CA  | SER | E     | 22  | 87.297 | 9.401  | 39.418 | 1.00172.99       | C |
| ANISOU | 2233 | CA  | SER | E     | 22  | 23179  | 22414  | 20135  | -818 -1680 2762  | C |
| ATOM   | 2234 | CB  | SER | E     | 22  | 87.621 | 7.920  | 39.612 | 1.00180.59       | C |
| ANISOU | 2234 | CB  | SER | E     | 22  | 24457  | 23214  | 20945  | -674 -1776 2796  | C |
| ATOM   | 2235 | C   | SER | E     | 22  | 86.182 | 9.851  | 40.374 | 1.00167.83       | C |
| ANISOU | 2235 | C   | SER | E     | 22  | 22451  | 21758  | 19559  | -1109 -1664 2774 | C |
| ATOM   | 2236 | O   | SER | E     | 22  | 85.571 | 9.045  | 41.061 | 1.00172.33       | O |
| ANISOU | 2236 | O   | SER | E     | 22  | 23216  | 22191  | 20071  | -1209 -1726 2805 | O |
| ATOM   | 2237 | N   | ALA | E     | 23  | 85.919 | 11.149 | 40.392 | 1.00158.05       | N |
| ANISOU | 2237 | N   | ALA | E     | 23  | 20930  | 20669  | 18453  | -1244 -1579 2748 | N |
| ATOM   | 2238 | CA  | ALA | E     | 23  | 84.882 | 11.738 | 41.223 | 1.00148.05       | C |
| ANISOU | 2238 | CA  | ALA | E     | 23  | 19557  | 19419  | 17275  | -1523 -1552 2755 | C |
| ATOM   | 2239 | CB  | ALA | E     | 23  | 85.131 | 13.219 | 41.411 | 1.00138.53       | C |
| ANISOU | 2239 | CB  | ALA | E     | 23  | 17999  | 18436  | 16201  | -1589 -1447 2728 | C |
| ATOM   | 2240 | C   | ALA | E     | 23  | 83.571 | 11.517 | 40.513 | 1.00142.25       | C |
| ANISOU | 2240 | C   | ALA | E     | 23  | 18953  | 18521  | 16575  | -1697 -1577 2750 | C |
| ATOM   | 2241 | O   | ALA | E     | 23  | 83.546 | 10.903 | 39.467 | 1.00149.28       | O |
| ANISOU | 2241 | O   | ALA | E     | 23  | 20009  | 19294  | 17415  | -1592 -1615 2741 | O |
| ATOM   | 2242 | N   | LEU | E     | 24  | 82.478 | 11.997 | 41.074 | 1.00135.44       | N |
| ANISOU | 2242 | N   | LEU | E     | 24  | 18018  | 17645  | 15797  | -1962 -1556 2754 | N |
| ATOM   | 2243 | CA  | LEU | E     | 24  | 81.199 | 11.819 | 40.421 | 1.00120.11       | C |
| ANISOU | 2243 | CA  | LEU | E     | 24  | 16191  | 15551  | 13892  | -2136 -1578 2745 | C |
| ATOM   | 2244 | CB  | LEU | E     | 24  | 80.061 | 12.282 | 41.329 | 1.00115.26       | C |
| ANISOU | 2244 | CB  | LEU | E     | 24  | 15502  | 14928  | 13363  | -2431 -1560 2756 | C |
| ATOM   | 2245 | CG  | LEU | E     | 24  | 78.686 | 12.383 | 40.672 | 1.00101.30       | C |
| ANISOU | 2245 | CG  | LEU | E     | 24  | 13788  | 13037  | 11664  | -2640 -1565 2741 | C |
| ATOM   | 2246 | CD1 | LEU | E     | 24  | 78.326 | 11.050 | 40.066 | 1.00106.54       | C |
| ANISOU | 2246 | CD1 | LEU | E     | 24  | 14781  | 13476  | 12224  | -2577 -1657 2747 | C |
| ATOM   | 2247 | CD2 | LEU | E     | 24  | 77.596 | 12.846 | 41.615 | 1.00108.16       | C |
| ANISOU | 2247 | CD2 | LEU | E     | 24  | 14579  | 13900  | 12617  | -2930 -1545 2752 | C |
| ATOM   | 2248 | C   | LEU | E     | 24  | 81.054 | 12.537 | 39.099 | 1.00121.53       | C |
| ANISOU | 2248 | C   | LEU | E     | 24  | 16248  | 15776  | 14151  | -2118 -1527 2707 | C |
| ATOM   | 2249 | O   | LEU | E     | 24  | 80.531 | 11.966 | 38.153 | 1.00129.95       | O |
| ANISOU | 2249 | O   | LEU | E     | 24  | 17490  | 16696  | 15188  | -2109 -1570 2697 | O |
| ATOM   | 2250 | N   | HIS | E     | 25  | 81.492 | 13.787 | 39.023 | 1.00122.17       | N |
| ANISOU | 2250 | N   | HIS | E     | 25  | 16031  | 16056  | 14332  | -2115 -1434 2685 | N |
| ATOM   | 2251 | CA  | HIS | E     | 25  | 81.279 | 14.530 | 37.792 | 1.00114.93       | C |
| ANISOU | 2251 | CA  | HIS | E     | 25  | 14989  | 15183  | 13496  | -2113 -1379 2650 | C |
| ATOM   | 2252 | CB  | HIS | E     | 25  | 81.565 | 16.009 | 37.967 | 1.00114.90       | C |
| ANISOU | 2252 | CB  | HIS | E     | 25  | 14636  | 15400  | 13621  | -2168 -1267 2629 | C |
| ATOM   | 2253 | CG  | HIS | E     | 25  | 82.964 | 16.310 | 38.386 | 1.00122.79       | C |
| ANISOU | 2253 | CG  | HIS | E     | 25  | 15491  | 16566  | 14598  | -1970 -1228 2627 | C |
| ATOM   | 2254 | ND1 | HIS | E     | 25  | 83.415 | 16.098 | 39.670 | 1.00129.04       | N |
| ANISOU | 2254 | ND1 | HIS | E     | 25  | 16273  | 17408  | 15348  | -1967 -1246 2650 | N |
| ATOM   | 2255 | CE1 | HIS | E     | 25  | 84.680 | 16.457 | 39.753 | 1.00128.48       | C |
| ANISOU | 2255 | CE1 | HIS | E     | 25  | 16059  | 17491  | 15267  | -1771 -1205 2638 | C |
| ATOM   | 2256 | NE2 | HIS | E     | 25  | 85.068 | 16.885 | 38.568 | 1.00119.60       | N |
| ANISOU | 2256 | NE2 | HIS | E     | 25  | 14853  | 16414  | 14176  | -1647 -1159 2609 | N |
| ATOM   | 2257 | CD2 | HIS | E     | 25  | 84.013 | 16.804 | 37.696 | 1.00121.99       | C |
| ANISOU | 2257 | CD2 | HIS | E     | 25  | 15249  | 16591  | 14509  | -1766 -1173 2603 | C |

|        |      |     |     |   |    |        |        |        |                  |   |
|--------|------|-----|-----|---|----|--------|--------|--------|------------------|---|
| ATOM   | 2258 | C   | HIS | E | 25 | 81.952 | 13.997 | 36.563 | 1.00115.77       | C |
| ANISOU | 2258 | C   | HIS | E | 25 | 15219  | 15239  | 13531  | -1872 -1404 2635 | C |
| ATOM   | 2259 | O   | HIS | E | 25 | 81.297 | 13.853 | 35.553 | 1.00122.87       | O |
| ANISOU | 2259 | O   | HIS | E | 25 | 16206  | 16037  | 14441  | -1905 -1420 2619 | O |
| ATOM   | 2260 | N   | TRP | E | 26 | 83.225 | 13.656 | 36.631 | 1.00114.60       | N |
| ANISOU | 2260 | N   | TRP | E | 26 | 15087  | 15150  | 13304  | -1629 -1413 2640 | N |
| ATOM   | 2261 | CA  | TRP | E | 26 | 83.876 | 13.096 | 35.460 | 1.00114.20       | C |
| ANISOU | 2261 | CA  | TRP | E | 26 | 15166  | 15044  | 13180  | -1395 -1440 2627 | C |
| ATOM   | 2262 | CB  | TRP | E | 26 | 85.382 | 12.970 | 35.612 | 1.00125.40       | C |
| ANISOU | 2262 | CB  | TRP | E | 26 | 16541  | 16571  | 14534  | -1132 -1431 2630 | C |
| ATOM   | 2263 | CG  | TRP | E | 26 | 86.133 | 14.175 | 35.108 | 1.00127.76       | C |
| ANISOU | 2263 | CG  | TRP | E | 26 | 16550  | 17069  | 14923  | -1038 -1328 2598 | C |
| ATOM   | 2264 | CD1 | TRP | E | 26 | 85.843 | 15.480 | 35.345 | 1.00125.19       | C |
| ANISOU | 2264 | CD1 | TRP | E | 26 | 15938  | 16897  | 14733  | -1188 -1234 2580 | C |
| ATOM   | 2265 | NE1 | TRP | E | 26 | 86.752 | 16.291 | 34.730 | 1.00123.88       | N |
| ANISOU | 2265 | NE1 | TRP | E | 26 | 15566  | 16885  | 14617  | -1034 -1154 2552 | N |
| ATOM   | 2266 | CE2 | TRP | E | 26 | 87.662 | 15.507 | 34.080 | 1.00137.55       | C |
| ANISOU | 2266 | CE2 | TRP | E | 26 | 17452  | 18566  | 16246  | -778 -1197 2551  | C |
| ATOM   | 2267 | CD2 | TRP | E | 26 | 87.302 | 14.172 | 34.300 | 1.00134.32       | C |
| ANISOU | 2267 | CD2 | TRP | E | 26 | 17352  | 17965  | 15718  | -774 -1306 2580  | C |
| ATOM   | 2268 | CE3 | TRP | E | 26 | 88.084 | 13.165 | 33.742 | 1.00141.21       | C |
| ANISOU | 2268 | CE3 | TRP | E | 26 | 18431  | 18750  | 16470  | -533 -1368 2586  | C |
| ATOM   | 2269 | CZ3 | TRP | E | 26 | 89.173 | 13.518 | 32.992 | 1.00144.85       | C |
| ANISOU | 2269 | CZ3 | TRP | E | 26 | 18787  | 19316  | 16934  | -310 -1319 2563  | C |
| ATOM   | 2270 | CH2 | TRP | E | 26 | 89.508 | 14.856 | 32.788 | 1.00147.49       | C |
| ANISOU | 2270 | CH2 | TRP | E | 26 | 18812  | 19839  | 17388  | -318 -1209 2534  | C |
| ATOM   | 2271 | CZ2 | TRP | E | 26 | 88.766 | 15.863 | 33.327 | 1.00146.03       | C |
| ANISOU | 2271 | CZ2 | TRP | E | 26 | 18419  | 19744  | 17323  | -550 -1146 2527  | C |
| ATOM   | 2272 | C   | TRP | E | 26 | 83.179 | 11.778 | 35.256 | 1.00115.44       | C |
| ANISOU | 2272 | C   | TRP | E | 26 | 15655  | 14968  | 13240  | -1422 -1543 2645 | C |
| ATOM   | 2273 | O   | TRP | E | 26 | 83.050 | 11.295 | 34.152 | 1.00115.59       | O |
| ANISOU | 2273 | O   | TRP | E | 26 | 15818  | 14881  | 13221  | -1337 -1575 2631 | O |
| ATOM   | 2274 | N   | ARG | E | 27 | 82.735 | 11.193 | 36.357 | 1.00124.07       | N |
| ANISOU | 2274 | N   | ARG | E | 27 | 16868  | 15979  | 14292  | -1542 -1593 2675 | N |
| ATOM   | 2275 | CA  | ARG | E | 27 | 82.027 | 9.928  | 36.312 | 1.00130.39       | C |
| ANISOU | 2275 | CA  | ARG | E | 27 | 17984  | 16554  | 15004  | -1586 -1688 2693 | C |
| ATOM   | 2276 | CB  | ARG | E | 27 | 81.750 | 9.411  | 37.729 | 1.00132.06       | C |
| ANISOU | 2276 | CB  | ARG | E | 27 | 18288  | 16714  | 15176  | -1700 -1728 2730 | C |
| ATOM   | 2277 | C   | ARG | E | 27 | 80.705 | 10.059 | 35.586 | 1.00125.85       | C |
| ANISOU | 2277 | C   | ARG | E | 27 | 17454  | 15868  | 14494  | -1779 -1693 2672 | C |
| ATOM   | 2278 | O   | ARG | E | 27 | 80.328 | 9.180  | 34.839 | 1.00132.59       | O |
| ANISOU | 2278 | O   | ARG | E | 27 | 18538  | 16555  | 15284  | -1739 -1755 2667 | O |
| ATOM   | 2279 | N   | ALA | E | 28 | 79.987 | 11.146 | 35.812 | 1.00117.55       | N |
| ANISOU | 2279 | N   | ALA | E | 28 | 16186  | 14910  | 13569  | -1989 -1628 2660 | N |
| ATOM   | 2280 | CA  | ALA | E | 28 | 78.697 | 11.318 | 35.159 | 1.00117.82       | C |
| ANISOU | 2280 | CA  | ALA | E | 28 | 16251  | 14845  | 13669  | -2182 -1632 2639 | C |
| ATOM   | 2281 | CB  | ALA | E | 28 | 77.896 | 12.401 | 35.854 | 1.00105.03       | C |
| ANISOU | 2281 | CB  | ALA | E | 28 | 14407  | 13322  | 12179  | -2440 -1568 2638 | C |
| ATOM   | 2282 | C   | ALA | E | 28 | 78.819 | 11.635 | 33.686 | 1.00118.13       | C |
| ANISOU | 2282 | C   | ALA | E | 28 | 16254  | 14900  | 13732  | -2071 -1607 2605 | C |
| ATOM   | 2283 | O   | ALA | E | 28 | 78.061 | 11.147 | 32.870 | 1.00109.36       | O |
| ANISOU | 2283 | O   | ALA | E | 28 | 15302  | 13646  | 12606  | -2116 -1650 2589 | O |
| ATOM   | 2284 | N   | ALA | E | 29 | 79.790 | 12.464 | 33.363 | 1.00114.80       | N |
| ANISOU | 2284 | N   | ALA | E | 29 | 15617  | 14655  | 13347  | -1926 -1534 2592 | N |
| ATOM   | 2285 | CA  | ALA | E | 29 | 80.031 | 12.938 | 32.004 | 1.00101.44       | C |
| ANISOU | 2285 | CA  | ALA | E | 29 | 13847  | 13009  | 11687  | -1809 -1494 2560 | C |
| ATOM   | 2286 | CB  | ALA | E | 29 | 81.296 | 13.772 | 31.955 | 1.00 94.46       | C |
| ANISOU | 2286 | CB  | ALA | E | 29 | 12727  | 12329  | 10833  | -1633 -1413 2552 | C |
| ATOM   | 2287 | C   | ALA | E | 29 | 80.131 | 11.836 | 30.979 | 1.00105.96       | C |
| ANISOU | 2287 | C   | ALA | E | 29 | 14687  | 13419  | 12153  | -1649 -1570 2552 | C |
| ATOM   | 2288 | O   | ALA | E | 29 | 79.226 | 11.671 | 30.168 | 1.00117.21       | O |
| ANISOU | 2288 | O   | ALA | E | 29 | 16206  | 14734  | 13593  | -1737 -1594 2532 | O |
| ATOM   | 2289 | N   | GLY | E | 30 | 81.177 | 11.027 | 31.095 | 1.00107.48       | N |

|        |      |     |     |   |    |        |        |        |            |       |      |   |
|--------|------|-----|-----|---|----|--------|--------|--------|------------|-------|------|---|
| ANISOU | 2289 | N   | GLY | E | 30 | 15013  | 13590  | 12236  | -1427      | -1611 | 2568 | N |
| ATOM   | 2290 | CA  | GLY | E | 30 | 81.461 | 9.957  | 30.157 | 1.00113.95 |       |      | C |
| ANISOU | 2290 | CA  | GLY | E | 30 | 16083  | 14266  | 12947  | -1245      | -1680 | 2562 | C |
| ATOM   | 2291 | C   | GLY | E | 30 | 80.261 | 9.055  | 30.016 | 1.00120.10 |       |      | C |
| ANISOU | 2291 | C   | GLY | E | 30 | 17112  | 14832  | 13690  | -1393      | -1760 | 2562 | C |
| ATOM   | 2292 | O   | GLY | E | 30 | 80.043 | 8.445  | 28.968 | 1.00121.28 |       |      | O |
| ANISOU | 2292 | O   | GLY | E | 30 | 17431  | 14859  | 13790  | -1318      | -1804 | 2544 | O |
| ATOM   | 2293 | N   | ALA | E | 31 | 79.539 | 8.896  | 31.119 | 1.00122.23 |       |      | N |
| ANISOU | 2293 | N   | ALA | E | 31 | 17415  | 15051  | 13975  | -1593      | -1782 | 2584 | N |
| ATOM   | 2294 | CA  | ALA | E | 31 | 78.327 | 8.092  | 31.128 | 1.00121.70 |       |      | C |
| ANISOU | 2294 | CA  | ALA | E | 31 | 17571  | 14783  | 13886  | -1761      | -1852 | 2583 | C |
| ATOM   | 2295 | CB  | ALA | E | 31 | 77.781 | 7.984  | 32.534 | 1.00120.70 |       |      | C |
| ANISOU | 2295 | CB  | ALA | E | 31 | 17456  | 14632  | 13775  | -1954      | -1865 | 2612 | C |
| ATOM   | 2296 | C   | ALA | E | 31 | 77.262 | 8.674  | 30.188 | 1.00121.57 |       |      | C |
| ANISOU | 2296 | C   | ALA | E | 31 | 17490  | 14741  | 13958  | -1912      | -1830 | 2546 | C |
| ATOM   | 2297 | O   | ALA | E | 31 | 76.646 | 7.935  | 29.408 | 1.00118.63 |       |      | O |
| ANISOU | 2297 | O   | ALA | E | 31 | 17323  | 14208  | 13544  | -1919      | -1889 | 2527 | O |
| ATOM   | 2298 | N   | ALA | E | 32 | 77.051 | 9.992  | 30.271 | 1.00119.65 |       |      | N |
| ANISOU | 2298 | N   | ALA | E | 32 | 16965  | 14659  | 13838  | -2030      | -1744 | 2535 | N |
| ATOM   | 2299 | CA  | ALA | E | 32 | 76.064 | 10.691 | 29.441 | 1.00107.63 |       |      | C |
| ANISOU | 2299 | CA  | ALA | E | 32 | 15348  | 13137  | 12411  | -2179      | -1712 | 2502 | C |
| ATOM   | 2300 | CB  | ALA | E | 32 | 76.011 | 12.176 | 29.793 | 1.00       | 92.51 |      | C |
| ANISOU | 2300 | CB  | ALA | E | 32 | 13100  | 11420  | 10628  | -2300      | -1609 | 2498 | C |
| ATOM   | 2301 | C   | ALA | E | 32 | 76.399 | 10.515 | 27.974 | 1.00108.36 |       |      | C |
| ANISOU | 2301 | C   | ALA | E | 32 | 15505  | 13202  | 12466  | -1995      | -1721 | 2473 | C |
| ATOM   | 2302 | O   | ALA | E | 32 | 75.529 | 10.214 | 27.152 | 1.00118.09 |       |      | O |
| ANISOU | 2302 | O   | ALA | E | 32 | 16855  | 14313  | 13699  | -2066      | -1757 | 2447 | O |
| ATOM   | 2303 | N   | THR | E | 33 | 77.674 | 10.717 | 27.665 | 1.00       | 99.46 |      | N |
| ANISOU | 2303 | N   | THR | E | 33 | 14295  | 12189  | 11306  | -1759      | -1685 | 2476 | N |
| ATOM   | 2304 | CA  | THR | E | 33 | 78.186 | 10.564 | 26.316 | 1.00105.16 |       |      | C |
| ANISOU | 2304 | CA  | THR | E | 33 | 15070  | 12900  | 11988  | -1555      | -1687 | 2451 | C |
| ATOM   | 2305 | CB  | THR | E | 33 | 79.697 | 10.649 | 26.307 | 1.00       | 97.11 |      | C |
| ANISOU | 2305 | CB  | THR | E | 33 | 13975  | 12000  | 10921  | -1296      | -1654 | 2463 | C |
| ATOM   | 2306 | OG1 | THR | E | 33 | 80.079 | 11.951 | 26.763 | 1.00       | 88.52 |      | O |
| ANISOU | 2306 | OG1 | THR | E | 33 | 12576  | 11120  | 9938   | -1337      | -1554 | 2464 | O |
| ATOM   | 2307 | CG2 | THR | E | 33 | 80.235 | 10.402 | 24.911 | 1.00       | 94.71 |      | C |
| ANISOU | 2307 | CG2 | THR | E | 33 | 13747  | 11672  | 10568  | -1077      | -1661 | 2439 | C |
| ATOM   | 2308 | C   | THR | E | 33 | 77.749 | 9.238  | 25.718 | 1.00114.17 |       |      | C |
| ANISOU | 2308 | C   | THR | E | 33 | 16530  | 13823  | 13025  | -1511      | -1788 | 2443 | C |
| ATOM   | 2309 | O   | THR | E | 33 | 77.246 | 9.182  | 24.590 | 1.00119.10 |       |      | O |
| ANISOU | 2309 | O   | THR | E | 33 | 17216  | 14381  | 13654  | -1506      | -1801 | 2412 | O |
| ATOM   | 2310 | N   | VAL | E | 34 | 77.935 | 8.173  | 26.489 | 1.00117.22 |       |      | N |
| ANISOU | 2310 | N   | VAL | E | 34 | 17120  | 14098  | 13319  | -1482      | -1857 | 2470 | N |
| ATOM   | 2311 | CA  | VAL | E | 34 | 77.535 | 6.846  | 26.047 | 1.00122.52 |       |      | C |
| ANISOU | 2311 | CA  | VAL | E | 34 | 18105  | 14555  | 13890  | -1445      | -1952 | 2464 | C |
| ATOM   | 2312 | CB  | VAL | E | 34 | 77.955 | 5.763  | 27.053 | 1.00127.73 |       |      | C |
| ANISOU | 2312 | CB  | VAL | E | 34 | 18961  | 15122  | 14450  | -1390      | -2014 | 2501 | C |
| ATOM   | 2313 | CG1 | VAL | E | 34 | 77.458 | 4.397  | 26.602 | 1.00126.11 |       |      | C |
| ANISOU | 2313 | CG1 | VAL | E | 34 | 19081  | 14688  | 14148  | -1368      | -2108 | 2493 | C |
| ATOM   | 2314 | CG2 | VAL | E | 34 | 79.469 | 5.759  | 27.226 | 1.00134.85 |       |      | C |
| ANISOU | 2314 | CG2 | VAL | E | 34 | 19804  | 16139  | 15293  | -1137      | -1991 | 2522 | C |
| ATOM   | 2315 | C   | VAL | E | 34 | 76.021 | 6.793  | 25.845 | 1.00130.53 |       |      | C |
| ANISOU | 2315 | C   | VAL | E | 34 | 19189  | 15448  | 14958  | -1691      | -1981 | 2440 | C |
| ATOM   | 2316 | O   | VAL | E | 34 | 75.543 | 6.239  | 24.852 | 1.00139.90 |       |      | O |
| ANISOU | 2316 | O   | VAL | E | 34 | 20537  | 16508  | 16110  | -1667      | -2028 | 2411 | O |
| ATOM   | 2317 | N   | LEU | E | 35 | 75.274 | 7.415  | 26.757 | 1.00125.98 |       |      | N |
| ANISOU | 2317 | N   | LEU | E | 35 | 18481  | 14916  | 14470  | -1927      | -1950 | 2449 | N |
| ATOM   | 2318 | CA  | LEU | E | 35 | 73.818 | 7.428  | 26.664 | 1.00121.37 |       |      | C |
| ANISOU | 2318 | CA  | LEU | E | 35 | 17945  | 14224  | 13945  | -2175      | -1973 | 2427 | C |
| ATOM   | 2319 | CB  | LEU | E | 35 | 73.200 | 7.968  | 27.963 | 1.00119.29 |       |      | C |
| ANISOU | 2319 | CB  | LEU | E | 35 | 17555  | 14008  | 13762  | -2415      | -1943 | 2450 | C |
| ATOM   | 2320 | CG  | LEU | E | 35 | 71.666 | 7.943  | 28.044 | 1.00124.79 |       |      | C |
| ANISOU | 2320 | CG  | LEU | E | 35 | 18306  | 14587  | 14521  | -2689      | -1968 | 2430 | C |

|        |      |     |     |   |    |        |        |        |                  |   |
|--------|------|-----|-----|---|----|--------|--------|--------|------------------|---|
| ATOM   | 2321 | CD1 | LEU | E | 35 | 71.115 | 6.524  | 27.906 | 1.00123.47       | C |
| ANISOU | 2321 | CD1 | LEU | E | 35 | 18466  | 14185  | 14261  | -2698 -2067 2422 | C |
| ATOM   | 2322 | CD2 | LEU | E | 35 | 71.144 | 8.614  | 29.305 | 1.00123.71       | C |
| ANISOU | 2322 | CD2 | LEU | E | 35 | 18013  | 14520  | 14472  | -2916 -1927 2453 | C |
| ATOM   | 2323 | C   | LEU | E | 35 | 73.340 | 8.264  | 25.466 | 1.00120.83       | C |
| ANISOU | 2323 | C   | LEU | E | 35 | 17742  | 14213  | 13955  | -2208 -1931 2387 | C |
| ATOM   | 2324 | O   | LEU | E | 35 | 72.313 | 7.952  | 24.850 | 1.00116.02       | O |
| ANISOU | 2324 | O   | LEU | E | 35 | 17248  | 13478  | 13355  | -2320 -1972 2356 | O |
| ATOM   | 2325 | N   | LEU | E | 36 | 74.093 | 9.307  | 25.123 | 1.00116.26       | N |
| ANISOU | 2325 | N   | LEU | E | 36 | 16923  | 13822  | 13429  | -2104 -1849 2385 | N |
| ATOM   | 2326 | CA  | LEU | E | 36 | 73.742 | 10.156 | 23.988 | 1.00111.80       | C |
| ANISOU | 2326 | CA  | LEU | E | 36 | 16216  | 13325  | 12937  | -2116 -1799 2350 | C |
| ATOM   | 2327 | CB  | LEU | E | 36 | 74.584 | 11.433 | 23.942 | 1.00105.31       | C |
| ANISOU | 2327 | CB  | LEU | E | 36 | 15093  | 12729  | 12190  | -2032 -1693 2356 | C |
| ATOM   | 2328 | CG  | LEU | E | 36 | 74.096 | 12.423 | 22.873 | 1.00 93.54       | C |
| ANISOU | 2328 | CG  | LEU | E | 36 | 13435  | 11315  | 10789  | -2077 -1633 2323 | C |
| ATOM   | 2329 | CD1 | LEU | E | 36 | 72.645 | 12.774 | 23.156 | 1.00 87.30       | C |
| ANISOU | 2329 | CD1 | LEU | E | 36 | 12610  | 10475  | 10085  | -2369 -1636 2311 | C |
| ATOM   | 2330 | CD2 | LEU | E | 36 | 74.941 | 13.685 | 22.841 | 1.00 85.62       | C |
| ANISOU | 2330 | CD2 | LEU | E | 36 | 12134  | 10534  | 9864   | -1993 -1521 2329 | C |
| ATOM   | 2331 | C   | LEU | E | 36 | 73.891 | 9.365  | 22.695 | 1.00104.07       | C |
| ANISOU | 2331 | C   | LEU | E | 36 | 15437  | 12232  | 11872  | -1941 -1855 2323 | C |
| ATOM   | 2332 | O   | LEU | E | 36 | 72.983 | 9.352  | 21.865 | 1.00103.12       | O |
| ANISOU | 2332 | O   | LEU | E | 36 | 15370  | 12034  | 11775  | -2028 -1876 2289 | O |
| ATOM   | 2333 | N   | VAL | E | 37 | 75.053 | 8.739  | 22.519 | 1.00102.79       | N |
| ANISOU | 2333 | N   | VAL | E | 37 | 15377  | 12066  | 11613  | -1694 -1876 2336 | N |
| ATOM   | 2334 | CA  | VAL | E | 37 | 75.326 | 7.913  | 21.342 | 1.00103.94       | C |
| ANISOU | 2334 | CA  | VAL | E | 37 | 15722  | 12102  | 11666  | -1507 -1931 2314 | C |
| ATOM   | 2335 | CB  | VAL | E | 37 | 76.711 | 7.240  | 21.459 | 1.00102.37       | C |
| ANISOU | 2335 | CB  | VAL | E | 37 | 15620  | 11912  | 11362  | -1243 -1949 2339 | C |
| ATOM   | 2336 | CG1 | VAL | E | 37 | 76.956 | 6.256  | 20.324 | 1.00 98.01       | C |
| ANISOU | 2336 | CG1 | VAL | E | 37 | 15303  | 11228  | 10708  | -1058 -2013 2317 | C |
| ATOM   | 2337 | CG2 | VAL | E | 37 | 77.800 | 8.299  | 21.491 | 1.00106.95       | C |
| ANISOU | 2337 | CG2 | VAL | E | 37 | 15936  | 12707  | 11992  | -1111 -1855 2350 | C |
| ATOM   | 2338 | C   | VAL | E | 37 | 74.234 | 6.842  | 21.152 | 1.00109.70       | C |
| ANISOU | 2338 | C   | VAL | E | 37 | 16721  | 12612  | 12348  | -1626 -2025 2293 | C |
| ATOM   | 2339 | O   | VAL | E | 37 | 73.909 | 6.455  | 20.023 | 1.00110.33       | O |
| ANISOU | 2339 | O   | VAL | E | 37 | 16923  | 12602  | 12395  | -1569 -2061 2259 | O |
| ATOM   | 2340 | N   | ILE | E | 38 | 73.628 | 6.412  | 22.258 | 1.00113.41       | N |
| ANISOU | 2340 | N   | ILE | E | 38 | 17273  | 12999  | 12820  | -1801 -2060 2313 | N |
| ATOM   | 2341 | CA  | ILE | E | 38 | 72.552 | 5.424  | 22.222 | 1.00114.60       | C |
| ANISOU | 2341 | CA  | ILE | E | 38 | 17668  | 12941  | 12934  | -1935 -2143 2294 | C |
| ATOM   | 2342 | CB  | ILE | E | 38 | 72.302 | 4.813  | 23.621 | 1.00121.74       | C |
| ANISOU | 2342 | CB  | ILE | E | 38 | 18676  | 13764  | 13815  | -2061 -2178 2328 | C |
| ATOM   | 2343 | CG1 | ILE | E | 38 | 73.519 | 4.015  | 24.086 | 1.00124.96       | C |
| ANISOU | 2343 | CG1 | ILE | E | 38 | 19207  | 14158  | 14113  | -1844 -2204 2365 | C |
| ATOM   | 2344 | CD1 | ILE | E | 38 | 73.446 | 3.602  | 25.551 | 1.00121.58       | C |
| ANISOU | 2344 | CD1 | ILE | E | 38 | 18836  | 13691  | 13668  | -1950 -2222 2406 | C |
| ATOM   | 2345 | CG2 | ILE | E | 38 | 71.078 | 3.913  | 23.600 | 1.00117.77       | C |
| ANISOU | 2345 | CG2 | ILE | E | 38 | 18404  | 13051  | 13294  | -2227 -2254 2305 | C |
| ATOM   | 2346 | C   | ILE | E | 38 | 71.243 | 6.035  | 21.718 | 1.00111.22       | C |
| ANISOU | 2346 | C   | ILE | E | 38 | 17160  | 12496  | 12601  | -2151 -2131 2255 | C |
| ATOM   | 2347 | O   | ILE | E | 38 | 70.576 | 5.471  | 20.843 | 1.00108.87       | O |
| ANISOU | 2347 | O   | ILE | E | 38 | 17024  | 12067  | 12276  | -2166 -2185 2217 | O |
| ATOM   | 2348 | N   | VAL | E | 39 | 70.886 | 7.187  | 22.280 | 1.00107.46       | N |
| ANISOU | 2348 | N   | VAL | E | 39 | 16436  | 12156  | 12238  | -2317 -2060 2264 | N |
| ATOM   | 2349 | CA  | VAL | E | 39 | 69.677 | 7.900  | 21.891 | 1.00104.11       | C |
| ANISOU | 2349 | CA  | VAL | E | 39 | 15904  | 11738  | 11914  | -2529 -2039 2232 | C |
| ATOM   | 2350 | CB  | VAL | E | 39 | 69.493 | 9.177  | 22.743 | 1.00 95.77       | C |
| ANISOU | 2350 | CB  | VAL | E | 39 | 14561  | 10849  | 10979  | -2697 -1952 2253 | C |
| ATOM   | 2351 | CG1 | VAL | E | 39 | 68.272 | 9.961  | 22.299 | 1.00 85.50       | C |
| ANISOU | 2351 | CG1 | VAL | E | 39 | 13140  | 9562   | 9785   | -2909 -1926 2220 | C |
| ATOM   | 2352 | CG2 | VAL | E | 39 | 69.341 | 8.802  | 24.194 | 1.00106.24       | C |

|        |      |     |     |   |    |        |        |        |            |       |      |   |
|--------|------|-----|-----|---|----|--------|--------|--------|------------|-------|------|---|
| ANISOU | 2352 | CG2 | VAL | E | 39 | 15936  | 12131  | 12300  | -2827      | -1972 | 2289 | C |
| ATOM   | 2353 | C   | VAL | E | 39 | 69.720 | 8.239  | 20.397 | 1.00106.25 |       |      | C |
| ANISOU | 2353 | C   | VAL | E | 39 | 16140  | 12041  | 12189  | -2411      | -2024 | 2193 | C |
| ATOM   | 2354 | O   | VAL | E | 39 | 68.692 | 8.222  | 19.715 | 1.00104.47 |       |      | O |
| ANISOU | 2354 | O   | VAL | E | 39 | 15963  | 11736  | 11993  | -2528      | -2050 | 2154 | O |
| ATOM   | 2355 | N   | LEU | E | 40 | 70.909 | 8.551  | 19.890 | 1.00101.29 |       |      | N |
| ANISOU | 2355 | N   | LEU | E | 40 | 15425  | 11530  | 11532  | -2177      | -1981 | 2202 | N |
| ATOM   | 2356 | CA  | LEU | E | 40 | 71.036 | 8.870  | 18.482 | 1.00       | 95.55 |      | C |
| ANISOU | 2356 | CA  | LEU | E | 40 | 14664  | 10837  | 10803  | -2048      | -1964 | 2169 | C |
| ATOM   | 2357 | CB  | LEU | E | 40 | 72.452 | 9.327  | 18.147 | 1.00       | 88.67 |      | C |
| ANISOU | 2357 | CB  | LEU | E | 40 | 13665  | 10115  | 9911   | -1797      | -1902 | 2187 | C |
| ATOM   | 2358 | CG  | LEU | E | 40 | 72.983 | 10.569 | 18.844 | 1.00       | 87.36 |      | C |
| ANISOU | 2358 | CG  | LEU | E | 40 | 13200  | 10156  | 9837   | -1827      | -1800 | 2214 | C |
| ATOM   | 2359 | CD1 | LEU | E | 40 | 74.383 | 10.857 | 18.330 | 1.00       | 91.11 |      | C |
| ANISOU | 2359 | CD1 | LEU | E | 40 | 13586  | 10753  | 10279  | -1555      | -1749 | 2224 | C |
| ATOM   | 2360 | CD2 | LEU | E | 40 | 72.063 | 11.751 | 18.631 | 1.00       | 75.80 |      | C |
| ANISOU | 2360 | CD2 | LEU | E | 40 | 11519  | 8783   | 8500   | -2022      | -1735 | 2196 | C |
| ATOM   | 2361 | C   | LEU | E | 40 | 70.658 | 7.670  | 17.619 | 1.00105.52 |       |      | C |
| ANISOU | 2361 | C   | LEU | E | 40 | 16214  | 11907  | 11971  | -1980      | -2058 | 2135 | C |
| ATOM   | 2362 | O   | LEU | E | 40 | 69.766 | 7.772  | 16.780 | 1.00111.73 |       |      | O |
| ANISOU | 2362 | O   | LEU | E | 40 | 17025  | 12640  | 12785  | -2063      | -2076 | 2094 | O |
| ATOM   | 2363 | N   | LEU | E | 41 | 71.298 | 6.526  | 17.854 | 1.00113.35 |       |      | N |
| ANISOU | 2363 | N   | LEU | E | 41 | 17424  | 12793  | 12853  | -1837      | -2120 | 2151 | N |
| ATOM   | 2364 | CA  | LEU | E | 41 | 71.002 | 5.326  | 17.074 | 1.00112.94 |       |      | C |
| ANISOU | 2364 | CA  | LEU | E | 41 | 17653  | 12553  | 12706  | -1765      | -2210 | 2120 | C |
| ATOM   | 2365 | CB  | LEU | E | 41 | 71.935 | 4.175  | 17.448 | 1.00106.93 |       |      | C |
| ANISOU | 2365 | CB  | LEU | E | 41 | 17100  | 11704  | 11826  | -1583      | -2262 | 2148 | C |
| ATOM   | 2366 | CG  | LEU | E | 41 | 73.436 | 4.395  | 17.288 | 1.00103.52 |       |      | C |
| ANISOU | 2366 | CG  | LEU | E | 41 | 16583  | 11399  | 11350  | -1321      | -2218 | 2176 | C |
| ATOM   | 2367 | CD1 | LEU | E | 41 | 74.183 | 3.133  | 17.675 | 1.00102.43 |       |      | C |
| ANISOU | 2367 | CD1 | LEU | E | 41 | 16681  | 11147  | 11090  | -1165      | -2281 | 2201 | C |
| ATOM   | 2368 | CD2 | LEU | E | 41 | 73.746 | 4.795  | 15.856 | 1.00101.14 |       |      | C |
| ANISOU | 2368 | CD2 | LEU | E | 41 | 16228  | 11154  | 11046  | -1164      | -2192 | 2143 | C |
| ATOM   | 2369 | C   | LEU | E | 41 | 69.554 | 4.894  | 17.255 | 1.00115.36 |       |      | C |
| ANISOU | 2369 | C   | LEU | E | 41 | 18084  | 12708  | 13041  | -2009      | -2266 | 2091 | C |
| ATOM   | 2370 | O   | LEU | E | 41 | 68.887 | 4.531  | 16.287 | 1.00116.92 |       |      | O |
| ANISOU | 2370 | O   | LEU | E | 41 | 18399  | 12805  | 13221  | -2023      | -2311 | 2045 | O |
| ATOM   | 2371 | N   | ALA | E | 42 | 69.070 | 4.932  | 18.491 | 1.00110.09 |       |      | N |
| ANISOU | 2371 | N   | ALA | E | 42 | 17390  | 12024  | 12416  | -2201      | -2265 | 2116 | N |
| ATOM   | 2372 | CA  | ALA | E | 42 | 67.687 | 4.561  | 18.758 | 1.00108.06 |       |      | C |
| ANISOU | 2372 | CA  | ALA | E | 42 | 17241  | 11625  | 12193  | -2445      | -2313 | 2089 | C |
| ATOM   | 2373 | CB  | ALA | E | 42 | 67.412 | 4.539  | 20.246 | 1.00112.70 |       |      | C |
| ANISOU | 2373 | CB  | ALA | E | 42 | 17805  | 12200  | 12814  | -2619      | -2307 | 2127 | C |
| ATOM   | 2374 | C   | ALA | E | 42 | 66.740 | 5.527  | 18.068 | 1.00108.59 |       |      | C |
| ANISOU | 2374 | C   | ALA | E | 42 | 17144  | 11753  | 12361  | -2594      | -2278 | 2051 | C |
| ATOM   | 2375 | O   | ALA | E | 42 | 65.859 | 5.114  | 17.309 | 1.00111.13 |       |      | O |
| ANISOU | 2375 | O   | ALA | E | 42 | 17593  | 11957  | 12677  | -2660      | -2329 | 2003 | O |
| ATOM   | 2376 | N   | GLY | E | 43 | 66.974 | 6.819  | 18.291 | 1.00107.38 |       |      | N |
| ANISOU | 2376 | N   | GLY | E | 43 | 16709  | 11791  | 12300  | -2633      | -2189 | 2070 | N |
| ATOM   | 2377 | CA  | GLY | E | 43 | 66.142 | 7.868  | 17.727 | 1.00109.30 |       |      | C |
| ANISOU | 2377 | CA  | GLY | E | 43 | 16767  | 12115  | 12647  | -2773      | -2142 | 2040 | C |
| ATOM   | 2378 | C   | GLY | E | 43 | 66.158 | 7.864  | 16.213 | 1.00109.06 |       |      | C |
| ANISOU | 2378 | C   | GLY | E | 43 | 16775  | 12076  | 12586  | -2634      | -2154 | 1997 | C |
| ATOM   | 2379 | O   | GLY | E | 43 | 65.119 | 8.048  | 15.580 | 1.00106.19 |       |      | O |
| ANISOU | 2379 | O   | GLY | E | 43 | 16414  | 11667  | 12266  | -2761      | -2171 | 1955 | O |
| ATOM   | 2380 | N   | SER | E | 44 | 67.345 | 7.676  | 15.641 | 1.00109.57 |       |      | N |
| ANISOU | 2380 | N   | SER | E | 44 | 16865  | 12189  | 12579  | -2370      | -2145 | 2008 | N |
| ATOM   | 2381 | CA  | SER | E | 44 | 67.515 | 7.582  | 14.199 | 1.00106.78 |       |      | C |
| ANISOU | 2381 | CA  | SER | E | 44 | 16565  | 11825  | 12183  | -2205      | -2158 | 1971 | C |
| ATOM   | 2382 | CB  | SER | E | 44 | 68.979 | 7.310  | 13.835 | 1.00108.29 |       |      | C |
| ANISOU | 2382 | CB  | SER | E | 44 | 16786  | 12069  | 12289  | -1911      | -2144 | 1993 | C |
| ATOM   | 2383 | OG  | SER | E | 44 | 69.802 | 8.412  | 14.172 | 1.00       | 96.83 |      | O |
| ANISOU | 2383 | OG  | SER | E | 44 | 15075  | 10818  | 10899  | -1850      | -2046 | 2028 | O |

|        |      |     |     |   |    |        |        |        |                  |   |
|--------|------|-----|-----|---|----|--------|--------|--------|------------------|---|
| ATOM   | 2384 | C   | SER | E | 44 | 66.615 | 6.488  | 13.633 | 1.00113.20       | C |
| ANISOU | 2384 | C   | SER | E | 44 | 17641  | 12433  | 12936  | -2259 -2257 1923 | C |
| ATOM   | 2385 | O   | SER | E | 44 | 65.889 | 6.720  | 12.667 | 1.00115.30       | O |
| ANISOU | 2385 | O   | SER | E | 44 | 17900  | 12681  | 13227  | -2303 -2267 1878 | O |
| ATOM   | 2386 | N   | TYR | E | 45 | 66.662 | 5.304  | 14.247 | 1.00114.61       | N |
| ANISOU | 2386 | N   | TYR | E | 45 | 18049  | 12460  | 13038  | -2256 -2328 1933 | N |
| ATOM   | 2387 | CA  | TYR | E | 45 | 65.853 | 4.165  | 13.813 | 1.00118.34       | C |
| ANISOU | 2387 | CA  | TYR | E | 45 | 18787  | 12727  | 13452  | -2306 -2422 1889 | C |
| ATOM   | 2388 | CB  | TYR | E | 45 | 66.161 | 2.926  | 14.654 | 1.00130.06       | C |
| ANISOU | 2388 | CB  | TYR | E | 45 | 20501  | 14067  | 14850  | -2275 -2483 1913 | C |
| ATOM   | 2389 | CG  | TYR | E | 45 | 65.321 | 1.706  | 14.303 | 1.00141.09       | C |
| ANISOU | 2389 | CG  | TYR | E | 45 | 22178  | 15242  | 16189  | -2336 -2578 1867 | C |
| ATOM   | 2390 | CD1 | TYR | E | 45 | 64.052 | 1.517  | 14.853 | 1.00146.23       | C |
| ANISOU | 2390 | CD1 | TYR | E | 45 | 22882  | 15785  | 16893  | -2594 -2610 1845 | C |
| ATOM   | 2391 | CE1 | TYR | E | 45 | 63.287 | 0.407  | 14.532 | 1.00152.01       | C |
| ANISOU | 2391 | CE1 | TYR | E | 45 | 23866  | 16315  | 17576  | -2650 -2693 1800 | C |
| ATOM   | 2392 | CZ  | TYR | E | 45 | 63.790 | -0.538 | 13.662 | 1.00158.03       | C |
| ANISOU | 2392 | CZ  | TYR | E | 45 | 24832  | 16980  | 18233  | -2446 -2746 1777 | C |
| ATOM   | 2393 | OH  | TYR | E | 45 | 63.030 | -1.644 | 13.347 | 1.00166.46       | O |
| ANISOU | 2393 | OH  | TYR | E | 45 | 26148  | 17845  | 19252  | -2503 -2826 1728 | O |
| ATOM   | 2394 | CE2 | TYR | E | 45 | 65.047 | -0.378 | 13.108 | 1.00153.45       | C |
| ANISOU | 2394 | CE2 | TYR | E | 45 | 24206  | 16502  | 17595  | -2188 -2718 1800 | C |
| ATOM   | 2395 | CD2 | TYR | E | 45 | 65.804 | 0.737  | 13.429 | 1.00146.63       | C |
| ANISOU | 2395 | CD2 | TYR | E | 45 | 23090  | 15841  | 16783  | -2134 -2634 1845 | C |
| ATOM   | 2396 | C   | TYR | E | 45 | 64.372 | 4.487  | 13.903 | 1.00113.45       | C |
| ANISOU | 2396 | C   | TYR | E | 45 | 18131  | 12056  | 12920  | -2581 -2435 1852 | C |
| ATOM   | 2397 | O   | TYR | E | 45 | 63.606 | 4.172  | 12.997 | 1.00124.21       | O |
| ANISOU | 2397 | O   | TYR | E | 45 | 19596  | 13326  | 14272  | -2616 -2482 1798 | O |
| ATOM   | 2398 | N   | LEU | E | 46 | 63.969 | 5.077  | 15.020 | 1.00105.20       | N |
| ANISOU | 2398 | N   | LEU | E | 46 | 16945  | 11067  | 11958  | -2777 -2395 1881 | N |
| ATOM   | 2399 | CA  | LEU | E | 46 | 62.573 | 5.431  | 15.227 | 1.00107.31       | C |
| ANISOU | 2399 | CA  | LEU | E | 46 | 17165  | 11292  | 12316  | -3050 -2402 1851 | C |
| ATOM   | 2400 | CB  | LEU | E | 46 | 62.351 | 5.886  | 16.674 | 1.00111.55       | C |
| ANISOU | 2400 | CB  | LEU | E | 46 | 17579  | 11878  | 12926  | -3240 -2362 1895 | C |
| ATOM   | 2401 | CG  | LEU | E | 46 | 62.362 | 4.816  | 17.764 | 1.00110.51       | C |
| ANISOU | 2401 | CG  | LEU | E | 46 | 17646  | 11604  | 12739  | -3288 -2415 1920 | C |
| ATOM   | 2402 | CD1 | LEU | E | 46 | 63.226 | 5.206  | 18.940 | 1.00108.74       | C |
| ANISOU | 2402 | CD1 | LEU | E | 46 | 17296  | 11495  | 12526  | -3261 -2361 1985 | C |
| ATOM   | 2403 | CD2 | LEU | E | 46 | 60.927 | 4.605  | 18.214 | 1.00100.88       | C |
| ANISOU | 2403 | CD2 | LEU | E | 46 | 16492  | 10259  | 11579  | -3566 -2451 1891 | C |
| ATOM   | 2404 | C   | LEU | E | 46 | 62.067 | 6.512  | 14.271 | 1.00112.14       | C |
| ANISOU | 2404 | C   | LEU | E | 46 | 17586  | 12017  | 13007  | -3094 -2355 1818 | C |
| ATOM   | 2405 | O   | LEU | E | 46 | 60.874 | 6.561  | 13.970 | 1.00119.42       | O |
| ANISOU | 2405 | O   | LEU | E | 46 | 18529  | 12870  | 13977  | -3272 -2383 1774 | O |
| ATOM   | 2406 | N   | ALA | E | 47 | 62.968 | 7.366  | 13.791 | 1.00114.23       | N |
| ANISOU | 2406 | N   | ALA | E | 47 | 17666  | 12452  | 13283  | -2932 -2284 1838 | N |
| ATOM   | 2407 | CA  | ALA | E | 47 | 62.586 | 8.438  | 12.872 | 1.00107.91       | C |
| ANISOU | 2407 | CA  | ALA | E | 47 | 16675  | 11769  | 12555  | -2955 -2230 1812 | C |
| ATOM   | 2408 | CB  | ALA | E | 47 | 63.698 | 9.462  | 12.754 | 1.00102.55       | C |
| ANISOU | 2408 | CB  | ALA | E | 47 | 15765  | 11295  | 11906  | -2797 -2133 1850 | C |
| ATOM   | 2409 | C   | ALA | E | 47 | 62.235 | 7.879  | 11.503 | 1.00103.10       | C |
| ANISOU | 2409 | C   | ALA | E | 47 | 16224  | 11064  | 11887  | -2860 -2291 1754 | C |
| ATOM   | 2410 | O   | ALA | E | 47 | 61.211 | 8.237  | 10.925 | 1.00104.18       | O |
| ANISOU | 2410 | O   | ALA | E | 47 | 16321  | 11185  | 12075  | -2991 -2299 1711 | O |
| ATOM   | 2411 | N   | VAL | E | 48 | 63.092 | 6.999  | 10.998 | 1.00105.17       | N |
| ANISOU | 2411 | N   | VAL | E | 48 | 16663  | 11260  | 12038  | -2631 -2334 1753 | N |
| ATOM   | 2412 | CA  | VAL | E | 48 | 62.869 | 6.344  | 9.717  | 1.00106.43       | C |
| ANISOU | 2412 | CA  | VAL | E | 48 | 16994  | 11319  | 12127  | -2519 -2396 1699 | C |
| ATOM   | 2413 | CB  | VAL | E | 48 | 64.039 | 5.407  | 9.357  | 1.00109.03       | C |
| ANISOU | 2413 | CB  | VAL | E | 48 | 17501  | 11593  | 12333  | -2250 -2432 1711 | C |
| ATOM   | 2414 | CG1 | VAL | E | 48 | 63.684 | 4.532  | 8.177  | 1.00118.20       | C |
| ANISOU | 2414 | CG1 | VAL | E | 48 | 18878  | 12616  | 13416  | -2162 -2510 1652 | C |
| ATOM   | 2415 | CG2 | VAL | E | 48 | 65.292 | 6.211  | 9.077  | 1.00105.85       | C |



|        |      |     |     |   |    |        |        |        |            |       |      |   |
|--------|------|-----|-----|---|----|--------|--------|--------|------------|-------|------|---|
| ANISOU | 2415 | CG2 | VAL | E | 48 | 16916  | 11370  | 11931  | -2043      | -2348 | 1749 | C |
| ATOM   | 2416 | C   | VAL | E | 48 | 61.555 | 5.569  | 9.758  | 1.00106.17 |       |      | C |
| ANISOU | 2416 | C   | VAL | E | 48 | 17142  | 11104  | 12094  | -2714      | -2480 | 1648 | C |
| ATOM   | 2417 | O   | VAL | E | 48 | 60.778 | 5.602  | 8.812  | 1.00114.17 |       |      | O |
| ANISOU | 2417 | O   | VAL | E | 48 | 18185  | 12077  | 13116  | -2755      | -2510 | 1593 | O |
| ATOM   | 2418 | N   | LEU | E | 49 | 61.322 | 4.864  | 10.859 | 1.00105.97 |       |      | N |
| ANISOU | 2418 | N   | LEU | E | 49 | 17238  | 10968  | 12057  | -2832      | -2518 | 1667 | N |
| ATOM   | 2419 | CA  | LEU | E | 49 | 60.093 | 4.109  | 11.053 | 1.00107.80 |       |      | C |
| ANISOU | 2419 | CA  | LEU | E | 49 | 17642  | 11022  | 12295  | -3029      | -2593 | 1622 | C |
| ATOM   | 2420 | CB  | LEU | E | 49 | 60.175 | 3.286  | 12.344 | 1.00121.02 |       |      | C |
| ANISOU | 2420 | CB  | LEU | E | 49 | 19454  | 12586  | 13942  | -3104      | -2623 | 1657 | C |
| ATOM   | 2421 | CG  | LEU | E | 49 | 58.968 | 2.465  | 12.827 | 1.00131.63 |       |      | C |
| ANISOU | 2421 | CG  | LEU | E | 49 | 20977  | 13739  | 15296  | -3322      | -2692 | 1621 | C |
| ATOM   | 2422 | CD1 | LEU | E | 49 | 59.439 | 1.159  | 13.465 | 1.00138.96 |       |      | C |
| ANISOU | 2422 | CD1 | LEU | E | 49 | 22152  | 14516  | 16130  | -3246      | -2747 | 1642 | C |
| ATOM   | 2423 | CD2 | LEU | E | 49 | 58.088 | 3.240  | 13.812 | 1.00126.57 |       |      | C |
| ANISOU | 2423 | CD2 | LEU | E | 49 | 20172  | 13144  | 14773  | -3595      | -2652 | 1635 | C |
| ATOM   | 2424 | C   | LEU | E | 49 | 58.874 | 5.027  | 11.092 | 1.00110.37 |       |      | C |
| ANISOU | 2424 | C   | LEU | E | 49 | 17800  | 11396  | 12738  | -3276      | -2565 | 1596 | C |
| ATOM   | 2425 | O   | LEU | E | 49 | 57.857 | 4.754  | 10.456 | 1.00118.54 |       |      | O |
| ANISOU | 2425 | O   | LEU | E | 49 | 18922  | 12335  | 13783  | -3376      | -2616 | 1535 | O |
| ATOM   | 2426 | N   | ALA | E | 50 | 58.983 | 6.115  | 11.847 | 1.00105.13 |       |      | N |
| ANISOU | 2426 | N   | ALA | E | 50 | 16896  | 10885  | 12166  | -3373      | -2484 | 1640 | N |
| ATOM   | 2427 | CA  | ALA | E | 50 | 57.878 | 7.058  | 12.016 | 1.00109.55 |       |      | C |
| ANISOU | 2427 | CA  | ALA | E | 50 | 17278  | 11502  | 12844  | -3614      | -2448 | 1624 | C |
| ATOM   | 2428 | CB  | ALA | E | 50 | 58.166 | 7.987  | 13.199 | 1.00104.40 |       |      | C |
| ANISOU | 2428 | CB  | ALA | E | 50 | 16403  | 10989  | 12274  | -3718      | -2365 | 1685 | C |
| ATOM   | 2429 | C   | ALA | E | 50 | 57.559 | 7.891  | 10.767 | 1.00113.31 |       |      | C |
| ANISOU | 2429 | C   | ALA | E | 50 | 17619  | 12076  | 13358  | -3579      | -2419 | 1586 | C |
| ATOM   | 2430 | O   | ALA | E | 50 | 56.398 | 8.229  | 10.523 | 1.00107.08 |       |      | O |
| ANISOU | 2430 | O   | ALA | E | 50 | 16787  | 11264  | 12636  | -3763      | -2430 | 1545 | O |
| ATOM   | 2431 | N   | GLU | E | 51 | 58.588 | 8.219  | 9.985  | 1.00114.63 |       |      | N |
| ANISOU | 2431 | N   | GLU | E | 51 | 17720  | 12352  | 13481  | -3340      | -2380 | 1600 | N |
| ATOM   | 2432 | CA  | GLU | E | 51 | 58.432 | 9.068  | 8.797  | 1.00103.11 |       |      | C |
| ANISOU | 2432 | CA  | GLU | E | 51 | 16122  | 11002  | 12055  | -3279      | -2341 | 1571 | C |
| ATOM   | 2433 | CB  | GLU | E | 51 | 59.678 | 9.934  | 8.583  | 1.00 99.72 |       |      | C |
| ANISOU | 2433 | CB  | GLU | E | 51 | 15500  | 10760  | 11630  | -3081      | -2249 | 1618 | C |
| ATOM   | 2434 | CG  | GLU | E | 51 | 59.994 | 10.888 | 9.714  | 1.00100.81 |       |      | C |
| ANISOU | 2434 | CG  | GLU | E | 51 | 15407  | 11039  | 11856  | -3179      | -2160 | 1676 | C |
| ATOM   | 2435 | CD  | GLU | E | 51 | 59.209 | 12.183 | 9.590  | 1.00 95.23 |       |      | C |
| ANISOU | 2435 | CD  | GLU | E | 51 | 14455  | 10456  | 11270  | -3348      | -2089 | 1670 | C |
| ATOM   | 2436 | OE1 | GLU | E | 51 | 59.491 | 12.952 | 8.640  | 1.00 89.63 |       |      | O |
| ANISOU | 2436 | OE1 | GLU | E | 51 | 13610  | 9866   | 10578  | -3232      | -2034 | 1662 | O |
| ATOM   | 2437 | OE2 | GLU | E | 51 | 58.325 | 12.435 | 10.440 | 1.00 98.82 |       |      | O |
| ANISOU | 2437 | OE2 | GLU | E | 51 | 14852  | 10891  | 11804  | -3593      | -2086 | 1673 | O |
| ATOM   | 2438 | C   | GLU | E | 51 | 58.144 | 8.329  | 7.503  | 1.00107.12 |       |      | C |
| ANISOU | 2438 | C   | GLU | E | 51 | 16816  | 11400  | 12484  | -3169      | -2416 | 1508 | C |
| ATOM   | 2439 | O   | GLU | E | 51 | 57.286 | 8.763  | 6.746  | 1.00112.24 |       |      | O |
| ANISOU | 2439 | O   | GLU | E | 51 | 17410  | 12062  | 13175  | -3251      | -2420 | 1463 | O |
| ATOM   | 2440 | N   | ARG | E | 52 | 58.838 | 7.238  | 7.246  | 1.00107.58 |       |      | N |
| ANISOU | 2440 | N   | ARG | E | 52 | 17091  | 11355  | 12431  | -2987      | -2473 | 1504 | N |
| ATOM   | 2441 | CA  | ARG | E | 52 | 58.721 | 6.553  | 5.976  | 1.00112.92 |       |      | C |
| ANISOU | 2441 | CA  | ARG | E | 52 | 17940  | 11939  | 13027  | -2853      | -2539 | 1447 | C |
| ATOM   | 2442 | CB  | ARG | E | 52 | 59.466 | 5.234  | 6.069  | 1.00108.36 |       |      | C |
| ANISOU | 2442 | CB  | ARG | E | 52 | 17614  | 11227  | 12331  | -2690      | -2604 | 1453 | C |
| ATOM   | 2443 | CG  | ARG | E | 52 | 60.346 | 4.877  | 4.890  | 1.00110.07 |       |      | C |
| ANISOU | 2443 | CG  | ARG | E | 52 | 17920  | 11451  | 12452  | -2411      | -2618 | 1439 | C |
| ATOM   | 2444 | CD  | ARG | E | 52 | 60.956 | 3.508  | 5.131  | 1.00121.65 |       |      | C |
| ANISOU | 2444 | CD  | ARG | E | 52 | 19646  | 12767  | 13807  | -2285      | -2686 | 1445 | C |
| ATOM   | 2445 | NE  | ARG | E | 52 | 62.230 | 3.299  | 4.457  | 1.00132.15 |       |      | N |
| ANISOU | 2445 | NE  | ARG | E | 52 | 21016  | 14142  | 15052  | -1997      | -2672 | 1465 | N |
| ATOM   | 2446 | CZ  | ARG | E | 52 | 63.069 | 2.316  | 4.763  | 1.00141.88 |       |      | C |
| ANISOU | 2446 | CZ  | ARG | E | 52 | 22426  | 15289  | 16193  | -1851      | -2708 | 1489 | C |

|        |      |     |     |   |    |        |        |       |                  |   |
|--------|------|-----|-----|---|----|--------|--------|-------|------------------|---|
| ATOM   | 2447 | NH1 | ARG | E | 52 | 62.767 | 1.466  | 5.728 | 1.00142.94       | N |
| ANISOU | 2447 | NH1 | ARG | E | 52 | 22712  | 15289  | 16309 | -1965 -2756 1497 | N |
| ATOM   | 2448 | NH2 | ARG | E | 52 | 64.208 | 2.180  | 4.109 | 1.00148.53       | N |
| ANISOU | 2448 | NH2 | ARG | E | 52 | 23295  | 16178  | 16962 | -1591 -2693 1505 | N |
| ATOM   | 2449 | C   | ARG | E | 52 | 57.281 | 6.287  | 5.633 | 1.00121.24       | C |
| ANISOU | 2449 | C   | ARG | E | 52 | 19077  | 12879  | 14112 | -3049 -2602 1379 | C |
| ATOM   | 2450 | O   | ARG | E | 52 | 56.504 | 5.877  | 6.468 | 1.00129.15       | O |
| ANISOU | 2450 | O   | ARG | E | 52 | 20152  | 13776  | 15145 | -3250 -2638 1371 | O |
| ATOM   | 2451 | N   | GLY | E | 53 | 56.928 | 6.548  | 4.383 | 1.00113.74       | N |
| ANISOU | 2451 | N   | GLY | E | 53 | 18110  | 11953  | 13153 | -2989 -2612 1330 | N |
| ATOM   | 2452 | CA  | GLY | E | 53 | 55.567 | 6.365  | 3.926 | 1.00113.49       | C |
| ANISOU | 2452 | CA  | GLY | E | 53 | 18145  | 11827  | 13152 | -3162 -2671 1259 | C |
| ATOM   | 2453 | C   | GLY | E | 53 | 54.675 | 7.561  | 4.203 | 1.00113.32       | C |
| ANISOU | 2453 | C   | GLY | E | 53 | 17888  | 11913  | 13256 | -3379 -2613 1260 | C |
| ATOM   | 2454 | O   | GLY | E | 53 | 53.490 | 7.535  | 3.875 | 1.00122.13       | O |
| ANISOU | 2454 | O   | GLY | E | 53 | 19031  | 12964  | 14408 | -3541 -2655 1203 | O |
| ATOM   | 2455 | N   | ALA | E | 54 | 55.212 | 8.611  | 4.813 | 1.00104.92       | N |
| ANISOU | 2455 | N   | ALA | E | 54 | 16592  | 11012  | 12259 | -3390 -2517 1323 | N |
| ATOM   | 2456 | CA  | ALA | E | 54 | 54.397 | 9.795  | 5.013 | 1.00103.49       | C |
| ANISOU | 2456 | CA  | ALA | E | 54 | 16180  | 10942  | 12199 | -3587 -2456 1325 | C |
| ATOM   | 2457 | CB  | ALA | E | 54 | 54.861 | 10.591 | 6.217 | 1.00107.38       | C |
| ANISOU | 2457 | CB  | ALA | E | 54 | 16476  | 11556  | 12768 | -3665 -2370 1398 | C |
| ATOM   | 2458 | C   | ALA | E | 54 | 54.523 | 10.597 | 3.738 | 1.00104.63       | C |
| ANISOU | 2458 | C   | ALA | E | 54 | 16195  | 11211  | 12347 | -3456 -2413 1306 | C |
| ATOM   | 2459 | O   | ALA | E | 54 | 55.479 | 10.407 | 2.983 | 1.00106.07       | O |
| ANISOU | 2459 | O   | ALA | E | 54 | 16424  | 11426  | 12452 | -3210 -2407 1313 | O |
| ATOM   | 2460 | N   | PRO | E | 55 | 53.586 | 11.522 | 3.504 | 1.00107.34       | N |
| ANISOU | 2460 | N   | PRO | E | 55 | 16372  | 11628  | 12783 | -3616 -2379 1286 | N |
| ATOM   | 2461 | CA  | PRO | E | 55 | 53.656 | 12.320 | 2.281 | 1.00107.75       | C |
| ANISOU | 2461 | CA  | PRO | E | 55 | 16299  | 11801  | 12841 | -3496 -2335 1268 | C |
| ATOM   | 2462 | CB  | PRO | E | 55 | 52.206 | 12.756 | 2.065 | 1.00 99.15       | C |
| ANISOU | 2462 | CB  | PRO | E | 55 | 15146  | 10697  | 11831 | -3724 -2353 1219 | C |
| ATOM   | 2463 | CG  | PRO | E | 55 | 51.608 | 12.727 | 3.397 | 1.00101.02       | C |
| ANISOU | 2463 | CG  | PRO | E | 55 | 15359  | 10883  | 12140 | -3970 -2355 1238 | C |
| ATOM   | 2464 | CD  | PRO | E | 55 | 52.298 | 11.683 | 4.196 | 1.00108.13       | C |
| ANISOU | 2464 | CD  | PRO | E | 55 | 16439  | 11675  | 12972 | -3910 -2398 1264 | C |
| ATOM   | 2465 | C   | PRO | E | 55 | 54.565 | 13.526 | 2.449 | 1.00107.31       | C |
| ANISOU | 2465 | C   | PRO | E | 55 | 15987  | 11948  | 12839 | -3404 -2212 1334 | C |
| ATOM   | 2466 | O   | PRO | E | 55 | 54.418 | 14.270 | 3.416 | 1.00 98.85       | O |
| ANISOU | 2466 | O   | PRO | E | 55 | 14742  | 10957  | 11861 | -3559 -2148 1375 | O |
| ATOM   | 2467 | N   | GLY | E | 56 | 55.526 | 13.699 | 1.548 | 1.00109.03       | N |
| ANISOU | 2467 | N   | GLY | E | 56 | 16184  | 12245  | 12999 | -3151 -2178 1344 | N |
| ATOM   | 2468 | CA  | GLY | E | 56 | 56.410 | 14.847 | 1.632 | 1.00107.34       | C |
| ANISOU | 2468 | CA  | GLY | E | 56 | 15726  | 12221  | 12835 | -3052 -2057 1402 | C |
| ATOM   | 2469 | C   | GLY | E | 56 | 57.220 | 14.763 | 2.903 | 1.00 99.38       | C |
| ANISOU | 2469 | C   | GLY | E | 56 | 14684  | 11235  | 11839 | -3058 -2023 1463 | C |
| ATOM   | 2470 | O   | GLY | E | 56 | 57.322 | 15.718 | 3.662 | 1.00 97.08       | O |
| ANISOU | 2470 | O   | GLY | E | 56 | 14177  | 11068  | 11640 | -3157 -1936 1507 | O |
| ATOM   | 2471 | N   | ALA | E | 57 | 57.787 | 13.591 | 3.131 | 1.00 99.16       | N |
| ANISOU | 2471 | N   | ALA | E | 57 | 14876  | 11085  | 11716 | -2951 -2094 1463 | N |
| ATOM   | 2472 | CA  | ALA | E | 57 | 58.618 | 13.350 | 4.289 | 1.00 84.62       | C |
| ANISOU | 2472 | CA  | ALA | E | 57 | 13035  | 9249   | 9866  | -2931 -2074 1518 | C |
| ATOM   | 2473 | CB  | ALA | E | 57 | 58.127 | 12.175 | 5.087 | 1.00 86.84       | C |
| ANISOU | 2473 | CB  | ALA | E | 57 | 13537  | 9348   | 10108 | -3057 -2170 1504 | C |
| ATOM   | 2474 | C   | ALA | E | 57 | 59.988 | 13.100 | 3.713 | 1.00 96.02       | C |
| ANISOU | 2474 | C   | ALA | E | 57 | 14525  | 10735  | 11224 | -2634 -2055 1539 | C |
| ATOM   | 2475 | O   | ALA | E | 57 | 60.097 | 12.608 | 2.592 | 1.00 96.15       | O |
| ANISOU | 2475 | O   | ALA | E | 57 | 14672  | 10698  | 11162 | -2479 -2100 1501 | O |
| ATOM   | 2476 | N   | GLN | E | 58 | 61.037 | 13.403 | 4.464 | 1.00104.69       | N |
| ANISOU | 2476 | N   | GLN | E | 58 | 15520  | 11925  | 12331 | -2552 -1991 1597 | N |
| ATOM   | 2477 | CA  | GLN | E | 58 | 62.368 | 13.278 | 3.895 | 1.00103.70       | C |
| ANISOU | 2477 | CA  | GLN | E | 58 | 15414  | 11854  | 12132 | -2267 -1964 1618 | C |
| ATOM   | 2478 | CB  | GLN | E | 58 | 62.958 | 14.664 | 3.690 | 1.00 95.05       | C |

|        |      |     |     |   |    |        |        |        |            |       |      |   |
|--------|------|-----|-----|---|----|--------|--------|--------|------------|-------|------|---|
| ANISOU | 2478 | CB  | GLN | E | 58 | 14035  | 10966  | 11113  | -2197      | -1836 | 1651 | C |
| ATOM   | 2479 | CG  | GLN | E | 58 | 62.254 | 15.471 | 2.620  | 1.00110.46 |       |      | C |
| ANISOU | 2479 | CG  | GLN | E | 58 | 15872  | 12985  | 13112  | -2224      | -1801 | 1618 | C |
| ATOM   | 2480 | CD  | GLN | E | 58 | 62.677 | 15.045 | 1.239  | 1.00109.15 |       |      | C |
| ANISOU | 2480 | CD  | GLN | E | 58 | 15830  | 12788  | 12854  | -1989      | -1832 | 1586 | C |
| ATOM   | 2481 | OE1 | GLN | E | 58 | 63.758 | 14.493 | 1.075  | 1.00113.16 |       |      | O |
| ANISOU | 2481 | OE1 | GLN | E | 58 | 16435  | 13279  | 13280  | -1776      | -1841 | 1602 | O |
| ATOM   | 2482 | NE2 | GLN | E | 58 | 61.842 | 15.311 | 0.236  | 1.00105.80 |       |      | N |
| ANISOU | 2482 | NE2 | GLN | E | 58 | 15401  | 12359  | 12440  | -2023      | -1846 | 1541 | N |
| ATOM   | 2483 | C   | GLN | E | 58 | 63.291 | 12.449 | 4.762  | 1.00       | 97.47 |      | C |
| ANISOU | 2483 | C   | GLN | E | 58 | 14750  | 11008  | 11279  | -2177      | -1992 | 1654 | C |
| ATOM   | 2484 | O   | GLN | E | 58 | 64.377 | 12.044 | 4.331  | 1.00105.33 |       |      | O |
| ANISOU | 2484 | O   | GLN | E | 58 | 15820  | 12008  | 12193  | -1938      | -1993 | 1666 | O |
| ATOM   | 2485 | N   | LEU | E | 59 | 62.820 | 12.162 | 5.968  | 1.00       | 93.00 |      | N |
| ANISOU | 2485 | N   | LEU | E | 59 | 14213  | 10379  | 10745  | -2371      | -2019 | 1669 | N |
| ATOM   | 2486 | CA  | LEU | E | 59 | 63.557 | 11.364 | 6.923  | 1.00       | 94.74 |      | C |
| ANISOU | 2486 | CA  | LEU | E | 59 | 14552  | 10536  | 10907  | -2318      | -2049 | 1705 | C |
| ATOM   | 2487 | CB  | LEU | E | 59 | 63.174 | 11.801 | 8.330  | 1.00       | 91.54 |      | C |
| ANISOU | 2487 | CB  | LEU | E | 59 | 14025  | 10168  | 10589  | -2542      | -2016 | 1739 | C |
| ATOM   | 2488 | CG  | LEU | E | 59 | 64.310 | 12.044 | 9.312  | 1.00       | 78.44 |      | C |
| ANISOU | 2488 | CG  | LEU | E | 59 | 12264  | 8607   | 8934   | -2460      | -1958 | 1799 | C |
| ATOM   | 2489 | CD1 | LEU | E | 59 | 65.419 | 12.837 | 8.633  | 1.00       | 77.64 |      | C |
| ANISOU | 2489 | CD1 | LEU | E | 59 | 11996  | 8669   | 8835   | -2238      | -1871 | 1818 | C |
| ATOM   | 2490 | CD2 | LEU | E | 59 | 63.736 | 12.827 | 10.483 | 1.00       | 75.19 |      | C |
| ANISOU | 2490 | CD2 | LEU | E | 59 | 11668  | 8266   | 8633   | -2705      | -1907 | 1826 | C |
| ATOM   | 2491 | C   | LEU | E | 59 | 63.230 | 9.900  | 6.654  | 1.00       | 93.24 |      | C |
| ANISOU | 2491 | C   | LEU | E | 59 | 14675  | 10138  | 10614  | -2290      | -2169 | 1667 | C |
| ATOM   | 2492 | O   | LEU | E | 59 | 62.642 | 9.216  | 7.484  | 1.00       | 96.77 |      | O |
| ANISOU | 2492 | O   | LEU | E | 59 | 15249  | 10463  | 11058  | -2447      | -2228 | 1664 | O |
| ATOM   | 2493 | N   | ILE | E | 60 | 63.565 | 9.450  | 5.449  | 1.00       | 93.51 |      | N |
| ANISOU | 2493 | N   | ILE | E | 60 | 14830  | 10133  | 10569  | -2095      | -2203 | 1635 | N |
| ATOM   | 2494 | CA  | ILE | E | 60 | 63.197 | 8.113  | 4.988  | 1.00       | 98.45 |      | C |
| ANISOU | 2494 | CA  | ILE | E | 60 | 15746  | 10563  | 11097  | -2061      | -2314 | 1590 | C |
| ATOM   | 2495 | CB  | ILE | E | 60 | 62.379 | 8.210  | 3.684  | 1.00105.88 |       |      | C |
| ANISOU | 2495 | CB  | ILE | E | 60 | 16719  | 11476  | 12036  | -2066      | -2344 | 1527 | C |
| ATOM   | 2496 | CG1 | ILE | E | 60 | 63.207 | 8.858  | 2.574  | 1.00100.79 |       |      | C |
| ANISOU | 2496 | CG1 | ILE | E | 60 | 15963  | 10961  | 11372  | -1836      | -2283 | 1531 | C |
| ATOM   | 2497 | CD1 | ILE | E | 60 | 62.459 | 9.015  | 1.265  | 1.00       | 96.60 |      | C |
| ANISOU | 2497 | CD1 | ILE | E | 60 | 15453  | 10416  | 10836  | -1827      | -2308 | 1471 | C |
| ATOM   | 2498 | CG2 | ILE | E | 60 | 61.139 | 9.057  | 3.898  | 1.00       | 97.75 |      | C |
| ANISOU | 2498 | CG2 | ILE | E | 60 | 15532  | 10489  | 11118  | -2324      | -2319 | 1508 | C |
| ATOM   | 2499 | C   | ILE | E | 60 | 64.325 | 7.095  | 4.758  | 1.00       | 98.26 |      | C |
| ANISOU | 2499 | C   | ILE | E | 60 | 15915  | 10468  | 10953  | -1813      | -2355 | 1603 | C |
| ATOM   | 2500 | O   | ILE | E | 60 | 64.069 | 6.002  | 4.264  | 1.00103.63 |       |      | O |
| ANISOU | 2500 | O   | ILE | E | 60 | 16834  | 10990  | 11549  | -1766      | -2443 | 1563 | O |
| ATOM   | 2501 | N   | THR | E | 61 | 65.565 | 7.428  | 5.095  | 1.00       | 95.04 |      | N |
| ANISOU | 2501 | N   | THR | E | 61 | 15407  | 10171  | 10533  | -1652      | -2293 | 1655 | N |
| ATOM   | 2502 | CA  | THR | E | 61 | 66.630 | 6.422  | 5.043  | 1.00103.57 |       |      | C |
| ANISOU | 2502 | CA  | THR | E | 61 | 16673  | 11178  | 11501  | -1432      | -2333 | 1672 | C |
| ATOM   | 2503 | CB  | THR | E | 61 | 67.503 | 6.486  | 3.764  | 1.00       | 97.40 |      | C |
| ANISOU | 2503 | CB  | THR | E | 61 | 15900  | 10449  | 10657  | -1161      | -2314 | 1661 | C |
| ATOM   | 2504 | OG1 | THR | E | 61 | 68.560 | 7.434  | 3.936  | 1.00101.93 |       |      | O |
| ANISOU | 2504 | OG1 | THR | E | 61 | 16255  | 11203  | 11269  | -1037      | -2213 | 1708 | O |
| ATOM   | 2505 | CG2 | THR | E | 61 | 66.696 | 6.848  | 2.549  | 1.00100.79 |       |      | C |
| ANISOU | 2505 | CG2 | THR | E | 61 | 16308  | 10881  | 11105  | -1185      | -2322 | 1607 | C |
| ATOM   | 2506 | C   | THR | E | 61 | 67.508 | 6.616  | 6.269  | 1.00114.34 |       |      | C |
| ANISOU | 2506 | C   | THR | E | 61 | 17944  | 12619  | 12881  | -1413      | -2285 | 1735 | C |
| ATOM   | 2507 | O   | THR | E | 61 | 67.605 | 7.723  | 6.805  | 1.00115.44 |       |      | O |
| ANISOU | 2507 | O   | THR | E | 61 | 17840  | 12910  | 13113  | -1492      | -2200 | 1766 | O |
| ATOM   | 2508 | N   | TYR | E | 62 | 68.110 | 5.528  | 6.734  | 1.00119.44 |       |      | N |
| ANISOU | 2508 | N   | TYR | E | 62 | 18939  | 10868  | 15577  | -63        | -2775 | 1176 | N |
| ATOM   | 2509 | CA  | TYR | E | 62 | 68.885 | 5.568  | 7.966  | 1.00122.76 |       |      | C |
| ANISOU | 2509 | CA  | TYR | E | 62 | 19408  | 11258  | 15976  | 64         | -2675 | 1061 | C |

|        |      |     |     |   |    |        |        |        |                 |   |
|--------|------|-----|-----|---|----|--------|--------|--------|-----------------|---|
| ATOM   | 2510 | CB  | TYR | E | 62 | 69.237 | 4.144  | 8.399  | 1.00134.96      | C |
| ANISOU | 2510 | CB  | TYR | E | 62 | 21314  | 12604  | 17361  | 135 -2914 930   | C |
| ATOM   | 2511 | CG  | TYR | E | 62 | 68.022 | 3.314  | 8.789  | 1.00150.40      | C |
| ANISOU | 2511 | CG  | TYR | E | 62 | 23425  | 14351  | 19367  | -89 -3057 1109  | C |
| ATOM   | 2512 | CD1 | TYR | E | 62 | 67.342 | 3.563  | 9.975  | 1.00155.13      | C |
| ANISOU | 2512 | CD1 | TYR | E | 62 | 23964  | 14869  | 20108  | -232 -2934 1264 | C |
| ATOM   | 2513 | CE1 | TYR | E | 62 | 66.212 | 2.817  | 10.336 | 1.00161.49      | C |
| ANISOU | 2513 | CE1 | TYR | E | 62 | 24908  | 15487  | 20965  | -441 -3062 1432 | C |
| ATOM   | 2514 | CZ  | TYR | E | 62 | 65.753 | 1.823  | 9.491  | 1.00163.90      | C |
| ANISOU | 2514 | CZ  | TYR | E | 62 | 25410  | 15684  | 21179  | -508 -3315 1446 | C |
| ATOM   | 2515 | OH  | TYR | E | 62 | 64.641 | 1.086  | 9.838  | 1.00163.46      | O |
| ANISOU | 2515 | OH  | TYR | E | 62 | 25479  | 15459  | 21170  | -713 -3435 1606 | O |
| ATOM   | 2516 | CE2 | TYR | E | 62 | 66.411 | 1.567  | 8.299  | 1.00164.40      | C |
| ANISOU | 2516 | CE2 | TYR | E | 62 | 25535  | 15828  | 21103  | -368 -3441 1294 | C |
| ATOM   | 2517 | CD2 | TYR | E | 62 | 67.532 | 2.313  | 7.952  | 1.00159.25      | C |
| ANISOU | 2517 | CD2 | TYR | E | 62 | 24744  | 15363  | 20401  | -161 -3312 1128 | C |
| ATOM   | 2518 | C   | TYR | E | 62 | 70.133 | 6.459  | 7.909  | 1.00113.53      | C |
| ANISOU | 2518 | C   | TYR | E | 62 | 18078  | 10285  | 14774  | 288 -2496 885   | C |
| ATOM   | 2519 | O   | TYR | E | 62 | 70.320 | 7.272  | 8.818  | 1.00122.11      | O |
| ANISOU | 2519 | O   | TYR | E | 62 | 19000  | 11433  | 15963  | 303 -2276 909   | O |
| ATOM   | 2520 | N   | PRO | E | 63 | 70.952 | 6.365  | 6.845  | 1.00100.73      | N |
| ANISOU | 2520 | N   | PRO | E | 63 | 16488  | 8768   | 13018  | 455 -2580 716   | N |
| ATOM   | 2521 | CA  | PRO | E | 63 | 72.104 | 7.275  | 6.827  | 1.00102.75      | C |
| ANISOU | 2521 | CA  | PRO | E | 63 | 16575  | 9214   | 13253  | 660 -2395 559   | C |
| ATOM   | 2522 | CB  | PRO | E | 63 | 72.780 | 6.949  | 5.501  | 1.00 87.44      | C |
| ANISOU | 2522 | CB  | PRO | E | 63 | 14709  | 7355   | 11158  | 806 -2543 400   | C |
| ATOM   | 2523 | CG  | PRO | E | 63 | 72.449 | 5.524  | 5.269  | 1.00 96.37      | C |
| ANISOU | 2523 | CG  | PRO | E | 63 | 16158  | 8291   | 12166  | 762 -2836 380   | C |
| ATOM   | 2524 | CD  | PRO | E | 63 | 71.023 | 5.385  | 5.742  | 1.00 97.67      | C |
| ANISOU | 2524 | CD  | PRO | E | 63 | 16309  | 8323   | 12477  | 492 -2843 634   | C |
| ATOM   | 2525 | C   | PRO | E | 63 | 71.723 | 8.759  | 6.910  | 1.00 98.28      | C |
| ANISOU | 2525 | C   | PRO | E | 63 | 15645  | 8818   | 12879  | 575 -2108 707   | C |
| ATOM   | 2526 | O   | PRO | E | 63 | 72.555 | 9.586  | 7.260  | 1.00 93.61      | O |
| ANISOU | 2526 | O   | PRO | E | 63 | 14899  | 8363   | 12305  | 716 -1917 608   | O |
| ATOM   | 2527 | N   | ARG | E | 64 | 70.465 | 9.073  | 6.615  | 1.00 98.94      | N |
| ANISOU | 2527 | N   | ARG | E | 64 | 15598  | 8890   | 13105  | 344 -2081 944   | N |
| ATOM   | 2528 | CA  | ARG | E | 64 | 69.966 | 10.442 | 6.665  | 1.00 93.62      | C |
| ANISOU | 2528 | CA  | ARG | E | 64 | 14583  | 8367   | 12620  | 239 -1819 1106  | C |
| ATOM   | 2529 | CB  | ARG | E | 64 | 68.800 | 10.643 | 5.702  | 1.00 95.69      | C |
| ANISOU | 2529 | CB  | ARG | E | 64 | 14731  | 8652   | 12976  | 36 -1858 1309   | C |
| ATOM   | 2530 | CG  | ARG | E | 64 | 69.132 | 10.592 | 4.232  | 1.00 90.80      | C |
| ANISOU | 2530 | CG  | ARG | E | 64 | 14103  | 8140   | 12257  | 119 -1965 1224  | C |
| ATOM   | 2531 | CD  | ARG | E | 64 | 67.836 | 10.713 | 3.447  | 1.00100.55      | C |
| ANISOU | 2531 | CD  | ARG | E | 64 | 15240  | 9369   | 13596  | -109 -2008 1448 | C |
| ATOM   | 2532 | NE  | ARG | E | 64 | 67.989 | 11.293 | 2.115  | 1.00113.63      | N |
| ANISOU | 2532 | NE  | ARG | E | 64 | 16736  | 11198  | 15240  | -65 -1985 1430  | N |
| ATOM   | 2533 | CZ  | ARG | E | 64 | 66.994 | 11.817 | 1.404  | 1.00104.80      | C |
| ANISOU | 2533 | CZ  | ARG | E | 64 | 15439  | 10140  | 14240  | -241 -1942 1623 | C |
| ATOM   | 2534 | NH1 | ARG | E | 64 | 65.768 | 11.869 | 1.901  | 1.00 94.55      | N |
| ANISOU | 2534 | NH1 | ARG | E | 64 | 14091  | 8748   | 13085  | -474 -1910 1851 | N |
| ATOM   | 2535 | NH2 | ARG | E | 64 | 67.238 | 12.307 | 0.200  | 1.00107.56      | N |
| ANISOU | 2535 | NH2 | ARG | E | 64 | 15656  | 10647  | 14565  | -181 -1927 1587 | N |
| ATOM   | 2536 | C   | ARG | E | 64 | 69.487 | 10.763 | 8.062  | 1.00 88.71      | C |
| ANISOU | 2536 | C   | ARG | E | 64 | 13899  | 7671   | 12137  | 129 -1667 1231  | C |
| ATOM   | 2537 | O   | ARG | E | 64 | 69.817 | 11.809 | 8.616  | 1.00 86.57      | O |
| ANISOU | 2537 | O   | ARG | E | 64 | 13407  | 7522   | 11963  | 173 -1425 1236  | O |
| ATOM   | 2538 | N   | ALA | E | 65 | 68.696 | 9.856  | 8.626  | 1.00 95.35      | N |
| ANISOU | 2538 | N   | ALA | E | 65 | 14934  | 8310   | 12986  | -17 -1810 1333  | N |
| ATOM   | 2539 | CA  | ALA | E | 65 | 68.167 | 10.039 | 9.968  | 1.00 93.54      | C |
| ANISOU | 2539 | CA  | ALA | E | 65 | 14670  | 7989   | 12883  | -133 -1689 1459 | C |
| ATOM   | 2540 | CB  | ALA | E | 65 | 67.154 | 8.977  | 10.280 | 1.00 98.04      | C |
| ANISOU | 2540 | CB  | ALA | E | 65 | 15456  | 8339   | 13457  | -315 -1880 1589 | C |
| ATOM   | 2541 | C   | ALA | E | 65 | 69.278 | 10.033 | 11.003 | 1.00 96.77      | C |

|        |      |     |     |   |    |        |        |        |            |       |      |   |
|--------|------|-----|-----|---|----|--------|--------|--------|------------|-------|------|---|
| ANISOU | 2541 | C   | ALA | E | 65 | 15147  | 8394   | 13226  | 59         | -1608 | 1277 | C |
| ATOM   | 2542 | O   | ALA | E | 65 | 69.108 | 10.557 | 12.097 | 1.00104.73 |       |      | O |
| ANISOU | 2542 | O   | ALA | E | 65 | 16050  | 9394   | 14351  | 10         | -1435 | 1352 | O |
| ATOM   | 2543 | N   | LEU | E | 66 | 70.419 | 9.446  | 10.658 | 1.00       | 96.76 |      | N |
| ANISOU | 2543 | N   | LEU | E | 66 | 15322  | 8402   | 13041  | 279        | -1732 | 1036 | N |
| ATOM   | 2544 | CA  | LEU | E | 66 | 71.551 | 9.423  | 11.576 | 1.00       | 94.04 |      | C |
| ANISOU | 2544 | CA  | LEU | E | 66 | 15047  | 8061   | 12622  | 477        | -1663 | 847  | C |
| ATOM   | 2545 | CB  | LEU | E | 66 | 72.602 | 8.402  | 11.134 | 1.00       | 93.98 |      | C |
| ANISOU | 2545 | CB  | LEU | E | 66 | 15313  | 8008   | 12389  | 686        | -1878 | 598  | C |
| ATOM   | 2546 | CG  | LEU | E | 66 | 73.894 | 8.354  | 11.956 | 1.00100.91 |       |      | C |
| ANISOU | 2546 | CG  | LEU | E | 66 | 16271  | 8903   | 13169  | 916        | -1817 | 377  | C |
| ATOM   | 2547 | CD1 | LEU | E | 66 | 74.277 | 6.919  | 12.253 | 1.00109.10 |       |      | C |
| ANISOU | 2547 | CD1 | LEU | E | 66 | 17668  | 9752   | 14033  | 997        | -2067 | 237  | C |
| ATOM   | 2548 | CD2 | LEU | E | 66 | 75.046 | 9.092  | 11.268 | 1.00       | 95.65 |      | C |
| ANISOU | 2548 | CD2 | LEU | E | 66 | 15459  | 8446   | 12435  | 1129       | -1712 | 198  | C |
| ATOM   | 2549 | C   | LEU | E | 66 | 72.158 | 10.808 | 11.594 | 1.00       | 90.16 |      | C |
| ANISOU | 2549 | C   | LEU | E | 66 | 14254  | 7789   | 12213  | 576        | -1390 | 811  | C |
| ATOM   | 2550 | O   | LEU | E | 66 | 72.518 | 11.341 | 12.637 | 1.00       | 89.47 |      | O |
| ANISOU | 2550 | O   | LEU | E | 66 | 14078  | 7728   | 12189  | 624        | -1214 | 791  | O |
| ATOM   | 2551 | N   | TRP | E | 67 | 72.228 | 11.387 | 10.406 | 1.00       | 88.90 |      | N |
| ANISOU | 2551 | N   | TRP | E | 67 | 13935  | 7786   | 12056  | 597        | -1360 | 811  | N |
| ATOM   | 2552 | CA  | TRP | E | 67 | 72.773 | 12.709 | 10.197 | 1.00       | 85.36 |      | C |
| ANISOU | 2552 | CA  | TRP | E | 67 | 13194  | 7559   | 11682  | 688        | -1116 | 780  | C |
| ATOM   | 2553 | CB  | TRP | E | 67 | 72.941 | 12.951 | 8.702  | 1.00       | 82.72 |      | C |
| ANISOU | 2553 | CB  | TRP | E | 67 | 12776  | 7362   | 11293  | 735        | -1169 | 740  | C |
| ATOM   | 2554 | CG  | TRP | E | 67 | 73.191 | 14.345 | 8.338  | 1.00       | 76.97 |      | C |
| ANISOU | 2554 | CG  | TRP | E | 67 | 11723  | 6855   | 10668  | 772        | -924  | 764  | C |
| ATOM   | 2555 | CD1 | TRP | E | 67 | 72.506 | 15.066 | 7.424  | 1.00       | 75.25 |      | C |
| ANISOU | 2555 | CD1 | TRP | E | 67 | 11290  | 6752   | 10552  | 652        | -854  | 911  | C |
| ATOM   | 2556 | NE1 | TRP | E | 67 | 73.030 | 16.325 | 7.324  | 1.00       | 81.62 |      | N |
| ANISOU | 2556 | NE1 | TRP | E | 67 | 11819  | 7760   | 11431  | 738        | -614  | 882  | N |
| ATOM   | 2557 | CE2 | TRP | E | 67 | 74.100 | 16.428 | 8.162  | 1.00       | 84.20 |      | C |
| ANISOU | 2557 | CE2 | TRP | E | 67 | 12181  | 8109   | 11701  | 921        | -526  | 709  | C |
| ATOM   | 2558 | CD2 | TRP | E | 67 | 74.245 | 15.194 | 8.819  | 1.00       | 83.77 |      | C |
| ANISOU | 2558 | CD2 | TRP | E | 67 | 12436  | 7859   | 11534  | 951        | -718  | 627  | C |
| ATOM   | 2559 | CE3 | TRP | E | 67 | 75.278 | 15.034 | 9.746  | 1.00       | 80.17 |      | C |
| ANISOU | 2559 | CE3 | TRP | E | 67 | 12078  | 7384   | 11001  | 1130       | -675  | 447  | C |
| ATOM   | 2560 | CZ3 | TRP | E | 67 | 76.125 | 16.103 | 9.985  | 1.00       | 77.57 |      | C |
| ANISOU | 2560 | CZ3 | TRP | E | 67 | 11535  | 7229   | 10709  | 1270       | -445  | 355  | C |
| ATOM   | 2561 | CH2 | TRP | E | 67 | 75.959 | 17.322 | 9.319  | 1.00       | 76.36 |      | C |
| ANISOU | 2561 | CH2 | TRP | E | 67 | 11075  | 7268   | 10669  | 1236       | -258  | 440  | C |
| ATOM   | 2562 | CZ2 | TRP | E | 67 | 74.959 | 17.504 | 8.407  | 1.00       | 82.43 |      | C |
| ANISOU | 2562 | CZ2 | TRP | E | 67 | 11745  | 8061   | 11515  | 1063       | -294  | 616  | C |
| ATOM   | 2563 | C   | TRP | E | 67 | 71.858 | 13.753 | 10.833 | 1.00       | 77.11 |      | C |
| ANISOU | 2563 | C   | TRP | E | 67 | 11882  | 6559   | 10859  | 502        | -882  | 1008 | C |
| ATOM   | 2564 | O   | TRP | E | 67 | 72.316 | 14.706 | 11.466 | 1.00       | 72.67 |      | O |
| ANISOU | 2564 | O   | TRP | E | 67 | 11127  | 6108   | 10375  | 569        | -652  | 986  | O |
| ATOM   | 2565 | N   | TRP | E | 68 | 70.560 | 13.578 | 10.616 | 1.00       | 75.72 |      | N |
| ANISOU | 2565 | N   | TRP | E | 68 | 11691  | 6298   | 10781  | 268        | -943  | 1228 | N |
| ATOM   | 2566 | CA  | TRP | E | 68 | 69.546 | 14.452 | 11.180 | 1.00       | 73.58 |      | C |
| ANISOU | 2566 | CA  | TRP | E | 68 | 11188  | 6049   | 10720  | 67         | -748  | 1465 | C |
| ATOM   | 2567 | CB  | TRP | E | 68 | 68.143 | 13.973 | 10.787 | 1.00       | 72.07 |      | C |
| ANISOU | 2567 | CB  | TRP | E | 68 | 11045  | 5740   | 10598  | -181       | -880  | 1684 | C |
| ATOM   | 2568 | CG  | TRP | E | 68 | 67.101 | 14.652 | 11.580 | 1.00       | 73.79 |      | C |
| ANISOU | 2568 | CG  | TRP | E | 68 | 11080  | 5939   | 11017  | -387       | -708  | 1919 | C |
| ATOM   | 2569 | CD1 | TRP | E | 68 | 66.674 | 15.944 | 11.458 | 1.00       | 71.43 |      | C |
| ANISOU | 2569 | CD1 | TRP | E | 68 | 10460  | 5796   | 10884  | -474       | -473  | 2062 | C |
| ATOM   | 2570 | NE1 | TRP | E | 68 | 65.718 | 16.214 | 12.416 | 1.00       | 73.54 |      | N |
| ANISOU | 2570 | NE1 | TRP | E | 68 | 10647  | 5985   | 11309  | -663       | -367  | 2263 | N |
| ATOM   | 2571 | CE2 | TRP | E | 68 | 65.533 | 15.103 | 13.183 | 1.00       | 79.02 |      | C |
| ANISOU | 2571 | CE2 | TRP | E | 68 | 11610  | 6473   | 11942  | -697       | -529  | 2250 | C |
| ATOM   | 2572 | CD2 | TRP | E | 68 | 66.395 | 14.091 | 12.693 | 1.00       | 79.27 |      | C |
| ANISOU | 2572 | CD2 | TRP | E | 68 | 11901  | 6449   | 11769  | -526       | -747  | 2034 | C |

|        |      |     |     |   |    |        |        |        |      |       |      |   |
|--------|------|-----|-----|---|----|--------|--------|--------|------|-------|------|---|
| ATOM   | 2573 | CE3 | TRP | E | 68 | 66.402 | 12.837 | 13.312 | 1.00 | 71.02 | C    |   |
| ANISOU | 2573 | CE3 | TRP | E | 68 | 11163  | 5198   | 10623  | -521 | -944  | 1977 | C |
| ATOM   | 2574 | CZ3 | TRP | E | 68 | 65.558 | 12.622 | 14.385 | 1.00 | 74.46 | C    |   |
| ANISOU | 2574 | CZ3 | TRP | E | 68 | 11639  | 5490   | 11163  | -687 | -921  | 2134 | C |
| ATOM   | 2575 | CH2 | TRP | E | 68 | 64.705 | 13.641 | 14.856 | 1.00 | 80.79 | C    |   |
| ANISOU | 2575 | CH2 | TRP | E | 68 | 12178  | 6351   | 12168  | -857 | -704  | 2349 | C |
| ATOM   | 2576 | CZ2 | TRP | E | 68 | 64.678 | 14.881 | 14.269 | 1.00 | 75.86 | C    |   |
| ANISOU | 2576 | CZ2 | TRP | E | 68 | 11250  | 5927   | 11645  | -865 | -507  | 2409 | C |
| ATOM   | 2577 | C   | TRP | E | 68 | 69.659 | 14.540 | 12.696 | 1.00 | 75.77 | C    |   |
| ANISOU | 2577 | C   | TRP | E | 68 | 11482  | 6249   | 11059  | 69   | -627  | 1473 | C |
| ATOM   | 2578 | O   | TRP | E | 68 | 69.563 | 15.619 | 13.272 | 1.00 | 73.29 | O    |   |
| ANISOU | 2578 | O   | TRP | E | 68 | 10924  | 6036   | 10888  | 35   | -383  | 1555 | O |
| ATOM   | 2579 | N   | SER | E | 69 | 69.852 | 13.391 | 13.332 | 1.00 | 76.95 | N    |   |
| ANISOU | 2579 | N   | SER | E | 69 | 11922  | 6217   | 11100  | 107  | -802  | 1388 | N |
| ATOM   | 2580 | CA  | SER | E | 69 | 69.950 | 13.315 | 14.789 | 1.00 | 81.12 | C    |   |
| ANISOU | 2580 | CA  | SER | E | 69 | 12503  | 6649   | 11672  | 110  | -717  | 1389 | C |
| ATOM   | 2581 | CB  | SER | E | 69 | 70.023 | 11.852 | 15.233 | 1.00 | 83.51 | C    |   |
| ANISOU | 2581 | CB  | SER | E | 69 | 13161  | 6733   | 11837  | 131  | -965  | 1306 | C |
| ATOM   | 2582 | OG  | SER | E | 69 | 71.248 | 11.264 | 14.838 | 1.00 | 87.92 | O    |   |
| ANISOU | 2582 | OG  | SER | E | 69 | 13897  | 7308   | 12200  | 367  | -1091 | 1049 | O |
| ATOM   | 2583 | C   | SER | E | 69 | 71.160 | 14.093 | 15.329 | 1.00 | 74.56 | C    |   |
| ANISOU | 2583 | C   | SER | E | 69 | 11547  | 5956   | 10825  | 319  | -519  | 1220 | C |
| ATOM   | 2584 | O   | SER | E | 69 | 71.058 | 14.822 | 16.323 | 1.00 | 69.66 | O    |   |
| ANISOU | 2584 | O   | SER | E | 69 | 10773  | 5364   | 10330  | 283  | -314  | 1292 | O |
| ATOM   | 2585 | N   | VAL | E | 70 | 72.310 | 13.916 | 14.643 | 1.00 | 69.95 | N    |   |
| ANISOU | 2585 | N   | VAL | E | 70 | 11035  | 5458   | 10083  | 539  | -588  | 994  | N |
| ATOM   | 2586 | CA  | VAL | E | 70 | 73.436 | 14.651 | 15.191 | 1.00 | 68.44 | C    |   |
| ANISOU | 2586 | CA  | VAL | E | 70 | 10727  | 5396   | 9882   | 732  | -399  | 838  | C |
| ATOM   | 2587 | CB  | VAL | E | 70 | 74.740 | 14.283 | 14.456 | 1.00 | 63.98 | C    |   |
| ANISOU | 2587 | CB  | VAL | E | 70 | 10284  | 4905   | 9122   | 983  | -505  | 573  | C |
| ATOM   | 2588 | CG1 | VAL | E | 70 | 75.899 | 15.139 | 14.943 | 1.00 | 73.65 | C    |   |
| ANISOU | 2588 | CG1 | VAL | E | 70 | 11362  | 6280   | 10342  | 1181 | -297  | 416  | C |
| ATOM   | 2589 | CG2 | VAL | E | 70 | 75.029 | 12.804 | 14.603 | 1.00 | 73.34 | C    |   |
| ANISOU | 2589 | CG2 | VAL | E | 70 | 11831  | 5902   | 10133  | 1050 | -775  | 446  | C |
| ATOM   | 2590 | C   | VAL | E | 70 | 73.224 | 16.151 | 15.088 | 1.00 | 69.01 | C    |   |
| ANISOU | 2590 | C   | VAL | E | 70 | 10437  | 5660   | 10124  | 680  | -122  | 952  | C |
| ATOM   | 2591 | O   | VAL | E | 70 | 73.459 | 16.892 | 16.039 | 1.00 | 75.05 | O    |   |
| ANISOU | 2591 | O   | VAL | E | 70 | 11057  | 6476   | 10981  | 705  | 86    | 963  | O |
| ATOM   | 2592 | N   | GLU | E | 71 | 72.725 | 16.596 | 13.895 | 1.00 | 75.27 | N    |   |
| ANISOU | 2592 | N   | GLU | E | 71 | 11082  | 6557   | 10961  | 597  | -122  | 1048 | N |
| ATOM   | 2593 | CA  | GLU | E | 71 | 72.518 | 18.030 | 13.713 | 1.00 | 76.58 | C    |   |
| ANISOU | 2593 | CA  | GLU | E | 71 | 10900  | 6911   | 11284  | 548  | 138   | 1158 | C |
| ATOM   | 2594 | CB  | GLU | E | 71 | 72.365 | 18.403 | 12.230 | 1.00 | 74.11 | C    |   |
| ANISOU | 2594 | CB  | GLU | E | 71 | 10463  | 6731   | 10962  | 534  | 108   | 1183 | C |
| ATOM   | 2595 | CG  | GLU | E | 71 | 71.179 | 17.806 | 11.518 | 1.00 | 75.21 | C    |   |
| ANISOU | 2595 | CG  | GLU | E | 71 | 10682  | 6770   | 11125  | 332  | -66   | 1354 | C |
| ATOM   | 2596 | CD  | GLU | E | 71 | 70.861 | 18.547 | 10.221 | 1.00 | 82.54 | C    |   |
| ANISOU | 2596 | CD  | GLU | E | 71 | 11397  | 7860   | 12104  | 283  | -14   | 1431 | C |
| ATOM   | 2597 | OE1 | GLU | E | 71 | 70.724 | 19.795 | 10.245 | 1.00 | 83.03 | O    |   |
| ANISOU | 2597 | OE1 | GLU | E | 71 | 11164  | 8076   | 12307  | 246  | 225   | 1522 | O |
| ATOM   | 2598 | OE2 | GLU | E | 71 | 70.740 | 17.876 | 9.171  | 1.00 | 97.65 | O    |   |
| ANISOU | 2598 | OE2 | GLU | E | 71 | 13440  | 9746   | 13917  | 281  | -215  | 1401 | O |
| ATOM   | 2599 | C   | GLU | E | 71 | 71.310 | 18.496 | 14.503 | 1.00 | 75.51 | C    |   |
| ANISOU | 2599 | C   | GLU | E | 71 | 10626  | 6717   | 11345  | 314  | 267   | 1411 | C |
| ATOM   | 2600 | O   | GLU | E | 71 | 71.033 | 19.692 | 14.574 | 1.00 | 80.58 | O    |   |
| ANISOU | 2600 | O   | GLU | E | 71 | 10981  | 7496   | 12139  | 252  | 497   | 1524 | O |
| ATOM   | 2601 | N   | THR | E | 72 | 70.580 | 17.555 | 15.086 | 1.00 | 73.18 | N    |   |
| ANISOU | 2601 | N   | THR | E | 72 | 10536  | 6221   | 11049  | 183  | 119   | 1502 | N |
| ATOM   | 2602 | CA  | THR | E | 72 | 69.439 | 17.931 | 15.898 | 1.00 | 75.27 | C    |   |
| ANISOU | 2602 | CA  | THR | E | 72 | 10686  | 6420   | 11495  | -37  | 233   | 1739 | C |
| ATOM   | 2603 | CB  | THR | E | 72 | 68.254 | 16.960 | 15.711 | 1.00 | 74.73 | C    |   |
| ANISOU | 2603 | CB  | THR | E | 72 | 10793  | 6168   | 11433  | -243 | 23    | 1899 | C |
| ATOM   | 2604 | OG1 | THR | E | 72 | 67.802 | 16.996 | 14.349 | 1.00 | 83.65 | O    |   |

|        |      |     |     |   |    |        |        |        |       |        |      |   |
|--------|------|-----|-----|---|----|--------|--------|--------|-------|--------|------|---|
| ANISOU | 2604 | OG1 | THR | E | 72 | 11869  | 7363   | 12552  | -311  | -66    | 1961 | O |
| ATOM   | 2605 | CG2 | THR | E | 72 | 67.111 | 17.318 | 16.657 | 1.00  | 71.76  |      | C |
| ANISOU | 2605 | CG2 | THR | E | 72 | 10308  | 5715   | 11241  | -465  | 143    | 2138 | C |
| ATOM   | 2606 | C   | THR | E | 72 | 69.879 | 17.979 | 17.366 | 1.00  | 73.02  |      | C |
| ANISOU | 2606 | C   | THR | E | 72 | 10437  | 6074   | 11234  | 27    | 345    | 1684 | C |
| ATOM   | 2607 | O   | THR | E | 72 | 69.471 | 18.866 | 18.117 | 1.00  | 71.43  |      | O |
| ANISOU | 2607 | O   | THR | E | 72 | 10028  | 5919   | 11193  | -63   | 560    | 1815 | O |
| ATOM   | 2608 | N   | ALA | E | 73 | 70.699 | 17.007 | 17.767 | 1.00  | 69.81  |      | N |
| ANISOU | 2608 | N   | ALA | E | 73 | 10298  | 5561   | 10667  | 182   | 196    | 1492 | N |
| ATOM   | 2609 | CA  | ALA | E | 73 | 71.223 | 16.920 | 19.137 | 1.00  | 74.15  |      | C |
| ANISOU | 2609 | CA  | ALA | E | 73 | 10915  | 6043   | 11214  | 265   | 277    | 1413 | C |
| ATOM   | 2610 | CB  | ALA | E | 73 | 71.955 | 15.599 | 19.334 | 1.00  | 69.58  |      | C |
| ANISOU | 2610 | CB  | ALA | E | 73 | 10679  | 5321   | 10439  | 410   | 47     | 1216 | C |
| ATOM   | 2611 | C   | ALA | E | 73 | 72.151 | 18.082 | 19.497 | 1.00  | 74.37  |      | C |
| ANISOU | 2611 | C   | ALA | E | 73 | 10714  | 6256   | 11287  | 420   | 532    | 1311 | C |
| ATOM   | 2612 | O   | ALA | E | 73 | 72.227 | 18.499 | 20.651 | 1.00  | 77.11  |      | O |
| ANISOU | 2612 | O   | ALA | E | 73 | 10991  | 6591   | 11718  | 420   | 689    | 1336 | O |
| ATOM   | 2613 | N   | THR | E | 74 | 72.902 | 18.569 | 18.558 | 1.00  | 70.80  |      | N |
| ANISOU | 2613 | N   | THR | E | 74 | 7468   | 11567  | 7865   | -2437 | 1390   | -39  | N |
| ATOM   | 2614 | CA  | THR | E | 74 | 73.840 | 19.668 | 18.783 | 1.00  | 79.11  |      | C |
| ANISOU | 2614 | CA  | THR | E | 74 | 8529   | 12588  | 8942   | -2417 | 1338   | 69   | C |
| ATOM   | 2615 | CB  | THR | E | 74 | 74.967 | 19.676 | 17.726 | 1.00  | 79.69  |      | C |
| ANISOU | 2615 | CB  | THR | E | 74 | 8572   | 12751  | 8957   | -2411 | 1311   | 138  | C |
| ATOM   | 2616 | OG1 | THR | E | 74 | 74.383 | 19.700 | 16.412 | 1.00  | 75.20  |      | O |
| ANISOU | 2616 | OG1 | THR | E | 74 | 7924   | 12301  | 8347   | -2417 | 1290   | 137  | O |
| ATOM   | 2617 | CG2 | THR | E | 74 | 75.861 | 18.445 | 17.874 | 1.00  | 93.73  |      | C |
| ANISOU | 2617 | CG2 | THR | E | 74 | 10401  | 14520  | 10692  | -2421 | 1365   | 96   | C |
| ATOM   | 2618 | C   | THR | E | 74 | 73.104 | 21.013 | 18.695 | 1.00  | 78.79  |      | C |
| ANISOU | 2618 | C   | THR | E | 74 | 8441   | 12549  | 8948   | -2406 | 1279   | 124  | C |
| ATOM   | 2619 | O   | THR | E | 74 | 73.679 | 22.057 | 18.983 | 1.00  | 76.15  |      | O |
| ANISOU | 2619 | O   | THR | E | 74 | 8111   | 12179  | 8645   | -2388 | 1232   | 211  | O |
| ATOM   | 2620 | N   | THR | E | 75 | 71.835 | 20.947 | 18.297 | 1.00  | 77.57  |      | N |
| ANISOU | 2620 | N   | THR | E | 75 | 8241   | 12434  | 8796   | -2416 | 1282   | 69   | N |
| ATOM   | 2621 | CA  | THR | E | 75 | 70.942 | 22.099 | 18.097 | 1.00  | 78.42  |      | C |
| ANISOU | 2621 | CA  | THR | E | 75 | 8298   | 12556  | 8943   | -2408 | 1230   | 106  | C |
| ATOM   | 2622 | CB  | THR | E | 75 | 70.780 | 23.002 | 19.374 | 1.00  | 85.12  |      | C |
| ANISOU | 2622 | CB  | THR | E | 75 | 9188   | 13286  | 9870   | -2397 | 1212   | 134  | C |
| ATOM   | 2623 | OG1 | THR | E | 75 | 71.990 | 23.723 | 19.653 | 1.00  | 89.45  |      | O |
| ANISOU | 2623 | OG1 | THR | E | 75 | 9758   | 13798  | 10429  | -2380 | 1177   | 230  | O |
| ATOM   | 2624 | CG2 | THR | E | 75 | 70.415 | 22.143 | 20.591 | 1.00  | 90.32  |      | C |
| ANISOU | 2624 | CG2 | THR | E | 75 | 9919   | 13843  | 10557  | -2409 | 1276   | 42   | C |
| ATOM   | 2625 | C   | THR | E | 75 | 71.336 | 22.978 | 16.898 | 1.00  | 90.72  |      | C |
| ANISOU | 2625 | C   | THR | E | 75 | 9784   | 14212  | 10472  | -2396 | 1165   | 201  | C |
| ATOM   | 2626 | O   | THR | E | 75 | 70.937 | 24.139 | 16.818 | 1.00  | 103.19 |      | O |
| ANISOU | 2626 | O   | THR | E | 75 | 11327  | 15793  | 12088  | -2385 | 1112   | 259  | O |
| ATOM   | 2627 | N   | VAL | E | 76 | 72.085 | 22.420 | 15.949 | 1.00  | 88.48  |      | N |
| ANISOU | 2627 | N   | VAL | E | 76 | 9480   | 14014  | 10124  | -2399 | 1169   | 216  | N |
| ATOM   | 2628 | CA  | VAL | E | 76 | 72.484 | 23.192 | 14.765 | 1.00  | 87.34  |      | C |
| ANISOU | 2628 | CA  | VAL | E | 76 | 9269   | 13969  | 9949   | -2388 | 1110   | 304  | C |
| ATOM   | 2629 | CB  | VAL | E | 76 | 73.611 | 22.479 | 13.979 | 1.00  | 82.37  |      | C |
| ANISOU | 2629 | CB  | VAL | E | 76 | 8637   | 13409  | 9251   | -2390 | 1122   | 323  | C |
| ATOM   | 2630 | CG1 | VAL | E | 76 | 73.908 | 23.225 | 12.665 | 1.00  | 72.70  |      | C |
| ANISOU | 2630 | CG1 | VAL | E | 76 | 7338   | 12295  | 7991   | -2381 | 1063   | 407  | C |
| ATOM   | 2631 | CG2 | VAL | E | 76 | 74.873 | 22.444 | 14.835 | 1.00  | 91.11  |      | C |
| ANISOU | 2631 | CG2 | VAL | E | 76 | 9814   | 14434  | 10370  | -2381 | 1132   | 362  | C |
| ATOM   | 2632 | C   | VAL | E | 76 | 71.264 | 23.416 | 13.861 | 1.00  | 91.80  |      | C |
| ANISOU | 2632 | C   | VAL | E | 76 | 9759   | 14617  | 10504  | -2394 | 1090   | 280  | C |
| ATOM   | 2633 | O   | VAL | E | 76 | 70.954 | 24.552 | 13.495 | 1.00  | 97.04  |      | O |
| ANISOU | 2633 | O   | VAL | E | 76 | 10374  | 15306  | 11190  | -2383 | 1033   | 345  | O |
| ATOM   | 2634 | N   | GLY | E | 77 | 70.567 | 22.331 | 13.520 | 1.00  | 95.23  |      | N |
| ANISOU | 2634 | N   | GLY | E | 77 | 10184  | 15093  | 10907  | -2412 | 1138   | 184  | N |
| ATOM   | 2635 | CA  | GLY | E | 77 | 69.362 | 22.424 | 12.706 | 1.00  | 92.84  |      | C |
| ANISOU | 2635 | CA  | GLY | E | 77 | 9814   | 14867  | 10594  | -2419 | 1126   | 150  | C |

|        |      |     |     |   |    |        |        |        |       |        |      |   |
|--------|------|-----|-----|---|----|--------|--------|--------|-------|--------|------|---|
| ATOM   | 2636 | C   | GLY | E | 77 | 69.408 | 23.172 | 11.382 | 1.00  | 93.48  | C    |   |
| ANISOU | 2636 | C   | GLY | E | 77 | 9814   | 15060  | 10643  | -2411 | 1067   | 223  | C |
| ATOM   | 2637 | O   | GLY | E | 77 | 68.670 | 24.151 | 11.181 | 1.00  | 100.67 | O    |   |
| ANISOU | 2637 | O   | GLY | E | 77 | 10681  | 15984  | 11585  | -2404 | 1022   | 255  | O |
| ATOM   | 2638 | N   | TYR | E | 78 | 70.243 | 22.692 | 10.460 | 1.00  | 91.95  | N    |   |
| ANISOU | 2638 | N   | TYR | E | 78 | 9601   | 14949  | 10386  | -2412 | 1067   | 246  | N |
| ATOM   | 2639 | CA  | TYR | E | 78 | 70.381 | 23.312 | 9.146  | 1.00  | 82.84  | C    |   |
| ANISOU | 2639 | CA  | TYR | E | 78 | 8372   | 13907  | 9196   | -2404 | 1014   | 316  | C |
| ATOM   | 2640 | CB  | TYR | E | 78 | 71.318 | 22.488 | 8.256  | 1.00  | 70.15  | C    |   |
| ANISOU | 2640 | CB  | TYR | E | 78 | 6755   | 12382  | 7517   | -2410 | 1031   | 321  | C |
| ATOM   | 2641 | CG  | TYR | E | 78 | 72.757 | 22.459 | 8.715  | 1.00  | 76.84  | C    |   |
| ANISOU | 2641 | CG  | TYR | E | 78 | 7655   | 13182  | 8358   | -2402 | 1032   | 376  | C |
| ATOM   | 2642 | CD1 | TYR | E | 78 | 73.496 | 23.638 | 8.834  | 1.00  | 84.72  | C    |   |
| ANISOU | 2642 | CD1 | TYR | E | 78 | 8652   | 14157  | 9382   | -2382 | 976    | 483  | C |
| ATOM   | 2643 | CE1 | TYR | E | 78 | 74.852 | 23.607 | 9.191  | 1.00  | 91.45  | C    |   |
| ANISOU | 2643 | CE1 | TYR | E | 78 | 9551   | 14971  | 10226  | -2374 | 977    | 535  | C |
| ATOM   | 2644 | CZ  | TYR | E | 78 | 75.461 | 22.383 | 9.433  | 1.00  | 90.59  | C    |   |
| ANISOU | 2644 | CZ  | TYR | E | 78 | 9490   | 14847  | 10083  | -2386 | 1033   | 479  | C |
| ATOM   | 2645 | OH  | TYR | E | 78 | 76.795 | 22.314 | 9.745  | 1.00  | 88.21  | O    |   |
| ANISOU | 2645 | OH  | TYR | E | 78 | 9234   | 14511  | 9771   | -2379 | 1035   | 528  | O |
| ATOM   | 2646 | CE2 | TYR | E | 78 | 74.740 | 21.201 | 9.329  | 1.00  | 87.02  | C    |   |
| ANISOU | 2646 | CE2 | TYR | E | 78 | 9040   | 14417  | 9605   | -2406 | 1090   | 373  | C |
| ATOM   | 2647 | CD2 | TYR | E | 78 | 73.399 | 21.245 | 8.972  | 1.00  | 81.58  | C    |   |
| ANISOU | 2647 | CD2 | TYR | E | 78 | 8305   | 13766  | 8925   | -2413 | 1089   | 322  | C |
| ATOM   | 2648 | C   | TYR | E | 78 | 69.060 | 23.475 | 8.408  | 1.00  | 77.11  | C    |   |
| ANISOU | 2648 | C   | TYR | E | 78 | 7579   | 13251  | 8467   | -2411 | 1000   | 278  | C |
| ATOM   | 2649 | O   | TYR | E | 78 | 68.832 | 24.483 | 7.762  | 1.00  | 71.47  | O    |   |
| ANISOU | 2649 | O   | TYR | E | 78 | 6808   | 12587  | 7759   | -2400 | 943    | 344  | O |
| ATOM   | 2650 | N   | GLY | E | 79 | 68.250 | 22.443 | 8.497  | 1.00  | 79.54  | N    |   |
| ANISOU | 2650 | N   | GLY | E | 79 | 7895   | 13562  | 8763   | -2428 | 1054   | 173  | N |
| ATOM   | 2651 | CA  | GLY | E | 79 | 66.988 | 22.398 | 7.810  | 1.00  | 79.45  | C    |   |
| ANISOU | 2651 | CA  | GLY | E | 79 | 7825   | 13618  | 8746   | -2435 | 1051   | 124  | C |
| ATOM   | 2652 | C   | GLY | E | 79 | 66.874 | 21.555 | 6.567  | 1.00  | 76.87  | C    |   |
| ANISOU | 2652 | C   | GLY | E | 79 | 7449   | 13409  | 8349   | -2446 | 1068   | 86   | C |
| ATOM   | 2653 | O   | GLY | E | 79 | 65.852 | 21.599 | 5.943  | 1.00  | 77.06  | O    |   |
| ANISOU | 2653 | O   | GLY | E | 79 | 7420   | 13492  | 8366   | -2451 | 1061   | 52   | O |
| ATOM   | 2654 | N   | ASP | E | 80 | 67.893 | 20.801 | 6.188  | 1.00  | 83.83  | N    |   |
| ANISOU | 2654 | N   | ASP | E | 80 | 8345   | 14327  | 9179   | -2450 | 1091   | 91   | N |
| ATOM   | 2655 | CA  | ASP | E | 80 | 67.775 | 19.945 | 5.021  | 1.00  | 69.92  | C    |   |
| ANISOU | 2655 | CA  | ASP | E | 80 | 6538   | 12678  | 7351   | -2461 | 1110   | 51   | C |
| ATOM   | 2656 | CB  | ASP | E | 80 | 69.114 | 19.466 | 4.486  | 1.00  | 72.52  | C    |   |
| ANISOU | 2656 | CB  | ASP | E | 80 | 6875   | 13053  | 7625   | -2460 | 1115   | 92   | C |
| ATOM   | 2657 | CG  | ASP | E | 80 | 69.966 | 18.844 | 5.517  | 1.00  | 78.29  | C    |   |
| ANISOU | 2657 | CG  | ASP | E | 80 | 7688   | 13694  | 8366   | -2463 | 1157   | 73   | C |
| ATOM   | 2658 | OD1 | ASP | E | 80 | 69.783 | 19.122 | 6.692  | 1.00  | 79.95  | O    |   |
| ANISOU | 2658 | OD1 | ASP | E | 80 | 7949   | 13797  | 8632   | -2460 | 1167   | 62   | O |
| ATOM   | 2659 | OD2 | ASP | E | 80 | 70.848 | 18.076 | 5.148  | 1.00  | 66.88  | O    |   |
| ANISOU | 2659 | OD2 | ASP | E | 80 | 6255   | 12285  | 6872   | -2469 | 1181   | 71   | O |
| ATOM   | 2660 | C   | ASP | E | 80 | 66.885 | 18.768 | 5.303  | 1.00  | 70.48  | C    |   |
| ANISOU | 2660 | C   | ASP | E | 80 | 6626   | 12736  | 7416   | -2479 | 1176   | -71  | C |
| ATOM   | 2661 | O   | ASP | E | 80 | 66.368 | 18.153 | 4.396  | 1.00  | 69.49  | O    |   |
| ANISOU | 2661 | O   | ASP | E | 80 | 6455   | 12700  | 7249   | -2488 | 1191   | -119 | O |
| ATOM   | 2662 | N   | LEU | E | 81 | 66.739 | 18.445 | 6.583  | 1.00  | 84.34  | N    |   |
| ANISOU | 2662 | N   | LEU | E | 81 | 8450   | 14379  | 9215   | -2483 | 1215   | -121 | N |
| ATOM   | 2663 | CA  | LEU | E | 81 | 65.963 | 17.292 | 7.040  | 1.00  | 78.92  | C    |   |
| ANISOU | 2663 | CA  | LEU | E | 81 | 7792   | 13665  | 8529   | -2500 | 1283   | -239 | C |
| ATOM   | 2664 | CB  | LEU | E | 81 | 66.878 | 16.090 | 7.274  | 1.00  | 70.98  | C    |   |
| ANISOU | 2664 | CB  | LEU | E | 81 | 6838   | 12645  | 7485   | -2510 | 1338   | -278 | C |
| ATOM   | 2665 | CG  | LEU | E | 81 | 67.674 | 15.504 | 6.119  | 1.00  | 72.79  | C    |   |
| ANISOU | 2665 | CG  | LEU | E | 81 | 7034   | 12981  | 7642   | -2514 | 1339   | -258 | C |
| ATOM   | 2666 | CD1 | LEU | E | 81 | 68.880 | 14.842 | 6.710  | 1.00  | 75.19  | C    |   |
| ANISOU | 2666 | CD1 | LEU | E | 81 | 7405   | 13233  | 7932   | -2516 | 1373   | -255 | C |
| ATOM   | 2667 | CD2 | LEU | E | 81 | 66.870 | 14.534 | 5.290  | 1.00  | 86.98  | C    |   |



|        |      |     |     |   |    |        |        |        |       |        |       |   |
|--------|------|-----|-----|---|----|--------|--------|--------|-------|--------|-------|---|
| ANISOU | 2667 | CD2 | LEU | E | 81 | 8789   | 14864  | 9396   | -2529 | 1375   | -344  | C |
| ATOM   | 2668 | C   | LEU | E | 81 | 65.230 | 17.623 | 8.341  | 1.00  | 74.87  |       | C |
| ANISOU | 2668 | C   | LEU | E | 81 | 7326   | 13034  | 8087   | -2500 | 1296   | -275  | C |
| ATOM   | 2669 | O   | LEU | E | 81 | 65.783 | 18.311 | 9.204  | 1.00  | 79.18  |       | O |
| ANISOU | 2669 | O   | LEU | E | 81 | 7914   | 13495  | 8675   | -2489 | 1276   | -220  | O |
| ATOM   | 2670 | N   | TYR | E | 82 | 64.013 | 17.103 | 8.490  | 1.00  | 73.76  |       | N |
| ANISOU | 2670 | N   | TYR | E | 82 | 7178   | 12888  | 7959   | -2512 | 1331   | -369  | N |
| ATOM   | 2671 | CA  | TYR | E | 82 | 63.214 | 17.297 | 9.698  | 1.00  | 74.39  |       | C |
| ANISOU | 2671 | CA  | TYR | E | 82 | 7301   | 12860  | 8104   | -2514 | 1349   | -416  | C |
| ATOM   | 2672 | CB  | TYR | E | 82 | 62.880 | 18.784 | 9.889  | 1.00  | 76.15  |       | C |
| ANISOU | 2672 | CB  | TYR | E | 82 | 7499   | 13054  | 8379   | -2499 | 1284   | -339  | C |
| ATOM   | 2673 | CG  | TYR | E | 82 | 62.200 | 19.453 | 8.704  | 1.00  | 88.44  |       | C |
| ANISOU | 2673 | CG  | TYR | E | 82 | 8970   | 14714  | 9919   | -2495 | 1234   | -308  | C |
| ATOM   | 2674 | CD1 | TYR | E | 82 | 60.826 | 19.374 | 8.534  | 1.00  | 82.67  |       | C |
| ANISOU | 2674 | CD1 | TYR | E | 82 | 8205   | 14002  | 9203   | -2503 | 1243   | -377  | C |
| ATOM   | 2675 | CE1 | TYR | E | 82 | 60.209 | 19.981 | 7.476  | 1.00  | 87.26  |       | C |
| ANISOU | 2675 | CE1 | TYR | E | 82 | 8709   | 14675  | 9770   | -2499 | 1199   | -350  | C |
| ATOM   | 2676 | CZ  | TYR | E | 82 | 60.956 | 20.674 | 6.551  | 1.00  | 88.86  |       | C |
| ANISOU | 2676 | CZ  | TYR | E | 82 | 8867   | 14954  | 9943   | -2486 | 1144   | -252  | C |
| ATOM   | 2677 | OH  | TYR | E | 82 | 60.319 | 21.274 | 5.484  | 1.00  | 102.08 |       | O |
| ANISOU | 2677 | OH  | TYR | E | 82 | 10463  | 16721  | 11601  | -2482 | 1100   | -226  | O |
| ATOM   | 2678 | CE2 | TYR | E | 82 | 62.322 | 20.764 | 6.688  | 1.00  | 83.00  |       | C |
| ANISOU | 2678 | CE2 | TYR | E | 82 | 8157   | 14196  | 9185   | -2479 | 1135   | -183  | C |
| ATOM   | 2679 | CD2 | TYR | E | 82 | 62.935 | 20.154 | 7.756  | 1.00  | 88.02  |       | C |
| ANISOU | 2679 | CD2 | TYR | E | 82 | 8870   | 14739  | 9836   | -2483 | 1179   | -211  | C |
| ATOM   | 2680 | C   | TYR | E | 82 | 61.933 | 16.465 | 9.644  | 1.00  | 82.27  |       | C |
| ANISOU | 2680 | C   | TYR | E | 82 | 8286   | 13873  | 9100   | -2529 | 1396   | -530  | C |
| ATOM   | 2681 | O   | TYR | E | 82 | 61.455 | 16.120 | 8.570  | 1.00  | 87.66  |       | O |
| ANISOU | 2681 | O   | TYR | E | 82 | 8910   | 14656  | 9740   | -2535 | 1396   | -557  | O |
| ATOM   | 2682 | N   | PRO | E | 83 | 61.376 | 16.125 | 10.815 | 1.00  | 85.71  |       | N |
| ANISOU | 2682 | N   | PRO | E | 83 | 8777   | 14206  | 9581   | -2536 | 1437   | -599  | N |
| ATOM   | 2683 | CA  | PRO | E | 83 | 60.129 | 15.359 | 10.901 | 1.00  | 93.15  |       | C |
| ANISOU | 2683 | CA  | PRO | E | 83 | 9715   | 15150  | 10529  | -2551 | 1484   | -711  | C |
| ATOM   | 2684 | CB  | PRO | E | 83 | 60.126 | 14.930 | 12.367 | 1.00  | 90.34  |       | C |
| ANISOU | 2684 | CB  | PRO | E | 83 | 9442   | 14665  | 10218  | -2556 | 1532   | -764  | C |
| ATOM   | 2685 | CG  | PRO | E | 83 | 60.728 | 16.105 | 13.040 | 1.00  | 85.95  |       | C |
| ANISOU | 2685 | CG  | PRO | E | 83 | 8911   | 14037  | 9708   | -2541 | 1483   | -671  | C |
| ATOM   | 2686 | CD  | PRO | E | 83 | 61.933 | 16.340 | 12.159 | 1.00  | 83.80  |       | C |
| ANISOU | 2686 | CD  | PRO | E | 83 | 8612   | 13840  | 9387   | -2532 | 1448   | -582  | C |
| ATOM   | 2687 | C   | PRO | E | 83 | 58.872 | 16.172 | 10.569 | 1.00  | 94.02  |       | C |
| ANISOU | 2687 | C   | PRO | E | 83 | 9768   | 15285  | 10669  | -2548 | 1447   | -714  | C |
| ATOM   | 2688 | O   | PRO | E | 83 | 58.784 | 17.349 | 10.917 | 1.00  | 102.07 |       | O |
| ANISOU | 2688 | O   | PRO | E | 83 | 10782  | 16264  | 11734  | -2537 | 1397   | -649  | O |
| ATOM   | 2689 | N   | VAL | E | 84 | 57.901 | 15.565 | 9.899  | 1.00  | 97.58  |       | N |
| ANISOU | 2689 | N   | VAL | E | 84 | 10177  | 15804  | 11095  | -2559 | 1471   | -790  | N |
| ATOM   | 2690 | CA  | VAL | E | 84 | 56.645 | 16.244 | 9.599  | 1.00  | 106.28 |       | C |
| ANISOU | 2690 | CA  | VAL | E | 84 | 11227  | 16929  | 12226  | -2558 | 1440   | -803  | C |
| ATOM   | 2691 | CB  | VAL | E | 84 | 56.367 | 16.332 | 8.118  | 1.00  | 96.90  |       | C |
| ANISOU | 2691 | CB  | VAL | E | 84 | 9956   | 15875  | 10987  | -2556 | 1411   | -786  | C |
| ATOM   | 2692 | CG1 | VAL | E | 84 | 57.371 | 17.228 | 7.438  | 1.00  | 96.68  |       | C |
| ANISOU | 2692 | CG1 | VAL | E | 84 | 9895   | 15900  | 10938  | -2542 | 1348   | -667  | C |
| ATOM   | 2693 | CG2 | VAL | E | 84 | 56.358 | 14.954 | 7.528  | 1.00  | 94.08  |       | C |
| ANISOU | 2693 | CG2 | VAL | E | 84 | 9592   | 15583  | 10572  | -2570 | 1467   | -866  | C |
| ATOM   | 2694 | C   | VAL | E | 84 | 55.473 | 15.489 | 10.188 | 1.00  | 106.12 |       | C |
| ANISOU | 2694 | C   | VAL | E | 84 | 11229  | 16863  | 12229  | -2572 | 1496   | -921  | C |
| ATOM   | 2695 | O   | VAL | E | 84 | 54.378 | 16.009 | 10.297 | 1.00  | 106.78 |       | O |
| ANISOU | 2695 | O   | VAL | E | 84 | 11288  | 16934  | 12350  | -2572 | 1480   | -944  | O |
| ATOM   | 2696 | N   | THR | E | 85 | 55.709 | 14.242 | 10.537 | 1.00  | 107.66 |       | N |
| ANISOU | 2696 | N   | THR | E | 85 | 11468  | 17036  | 12400  | -2584 | 1562   | -996  | N |
| ATOM   | 2697 | CA  | THR | E | 85 | 54.692 | 13.419 | 11.136 | 1.00  | 115.16 |       | C |
| ANISOU | 2697 | CA  | THR | E | 85 | 12446  | 17940  | 13370  | -2597 | 1620   | -1111 | C |
| ATOM   | 2698 | CB  | THR | E | 85 | 55.192 | 11.993 | 11.260 | 1.00  | 114.17 |       | C |
| ANISOU | 2698 | CB  | THR | E | 85 | 12360  | 17814  | 13203  | -2609 | 1689   | -1180 | C |

|        |      |     |     |   |    |        |        |        |                  |   |
|--------|------|-----|-----|---|----|--------|--------|--------|------------------|---|
| ATOM   | 2699 | OG1 | THR | E | 85 | 56.401 | 12.005 | 12.011 | 1.00112.45       | O |
| ANISOU | 2699 | OG1 | THR | E | 85 | 12205  | 17527  | 12993  | -2604 1694 -1131 | O |
| ATOM   | 2700 | CG2 | THR | E | 85 | 55.497 | 11.431 | 9.921  | 1.00105.33       | C |
| ANISOU | 2700 | CG2 | THR | E | 85 | 11186  | 16821  | 12013  | -2612 1690 -1178 | C |
| ATOM   | 2701 | C   | THR | E | 85 | 54.566 | 13.914 | 12.536 | 1.00117.69       | C |
| ANISOU | 2701 | C   | THR | E | 85 | 12827  | 18128  | 13759  | -2595 1622 -1109 | C |
| ATOM   | 2702 | O   | THR | E | 85 | 55.569 | 14.233 | 13.133 | 1.00111.07       | O |
| ANISOU | 2702 | O   | THR | E | 85 | 12033  | 17232  | 12934  | -2587 1611 -1048 | O |
| ATOM   | 2703 | N   | LEU | E | 86 | 53.366 | 13.951 | 13.089 | 1.00128.64       | N |
| ANISOU | 2703 | N   | LEU | E | 86 | 15883  | 16137  | 16859  | -4465 -1969 2160 | N |
| ATOM   | 2704 | CA  | LEU | E | 86 | 53.233 | 14.408 | 14.457 | 1.00127.24       | C |
| ANISOU | 2704 | CA  | LEU | E | 86 | 15565  | 16220  | 16559  | -4348 -1914 2264 | C |
| ATOM   | 2705 | CB  | LEU | E | 86 | 51.798 | 14.489 | 14.915 | 1.00129.39       | C |
| ANISOU | 2705 | CB  | LEU | E | 86 | 15692  | 16695  | 16776  | -4396 -1907 2491 | C |
| ATOM   | 2706 | CG  | LEU | E | 86 | 51.783 | 14.904 | 16.376 | 1.00130.36       | C |
| ANISOU | 2706 | CG  | LEU | E | 86 | 15690  | 17073  | 16768  | -4246 -1838 2583 | C |
| ATOM   | 2707 | CD1 | LEU | E | 86 | 52.385 | 16.294 | 16.529 | 1.00132.23       | C |
| ANISOU | 2707 | CD1 | LEU | E | 86 | 15936  | 17421  | 16885  | -4087 -1751 2369 | C |
| ATOM   | 2708 | CD2 | LEU | E | 86 | 50.375 | 14.826 | 16.944 | 1.00127.82       | C |
| ANISOU | 2708 | CD2 | LEU | E | 86 | 15219  | 16947  | 16400  | -4292 -1830 2838 | C |
| ATOM   | 2709 | C   | LEU | E | 86 | 54.010 | 13.470 | 15.320 | 1.00122.04       | C |
| ANISOU | 2709 | C   | LEU | E | 86 | 14914  | 15525  | 15933  | -4304 -1931 2345 | C |
| ATOM   | 2710 | O   | LEU | E | 86 | 54.584 | 13.874 | 16.298 | 1.00118.86       | O |
| ANISOU | 2710 | O   | LEU | E | 86 | 14462  | 15260  | 15439  | -4162 -1879 2321 | O |
| ATOM   | 2711 | N   | TRP | E | 87 | 53.991 | 12.199 | 14.987 | 1.00125.94       | N |
| ANISOU | 2711 | N   | TRP | E | 87 | 15466  | 15835  | 16552  | -4432 -2001 2453 | N |
| ATOM   | 2712 | CA  | TRP | E | 87 | 54.737 | 11.236 | 15.767 | 1.00120.30       | C |
| ANISOU | 2712 | CA  | TRP | E | 87 | 14759  | 15070  | 15878  | -4396 -2017 2537 | C |
| ATOM   | 2713 | CB  | TRP | E | 87 | 54.293 | 9.822  | 15.438 | 1.00136.53       | C |
| ANISOU | 2713 | CB  | TRP | E | 87 | 16853  | 16961  | 18062  | -4561 -2093 2713 | C |
| ATOM   | 2714 | CG  | TRP | E | 87 | 53.343 | 9.325  | 16.442 | 1.00141.79       | C |
| ANISOU | 2714 | CG  | TRP | E | 87 | 17377  | 17811  | 18687  | -4585 -2104 2980 | C |
| ATOM   | 2715 | CD1 | TRP | E | 87 | 52.104 | 9.808  | 16.708 | 1.00148.82       | C |
| ANISOU | 2715 | CD1 | TRP | E | 87 | 18143  | 18902  | 19500  | -4608 -2092 3111 | C |
| ATOM   | 2716 | NE1 | TRP | E | 87 | 51.535 | 9.105  | 17.722 | 1.00144.11       | N |
| ANISOU | 2716 | NE1 | TRP | E | 87 | 17435  | 18434  | 18888  | -4619 -2106 3354 | N |
| ATOM   | 2717 | CE2 | TRP | E | 87 | 52.419 | 8.147  | 18.135 | 1.00146.14       | C |
| ANISOU | 2717 | CE2 | TRP | E | 87 | 17743  | 18573  | 19210  | -4603 -2128 3380 | C |
| ATOM   | 2718 | CD2 | TRP | E | 87 | 53.566 | 8.266  | 17.349 | 1.00141.11       | C |
| ANISOU | 2718 | CD2 | TRP | E | 87 | 17252  | 17728  | 18633  | -4579 -2125 3151 | C |
| ATOM   | 2719 | CE3 | TRP | E | 87 | 54.636 | 7.401  | 17.574 | 1.00144.51       | C |
| ANISOU | 2719 | CE3 | TRP | E | 87 | 17757  | 18007  | 19142  | -4555 -2139 3136 | C |
| ATOM   | 2720 | CZ3 | TRP | E | 87 | 54.525 | 6.464  | 18.559 | 1.00157.99       | C |
| ANISOU | 2720 | CZ3 | TRP | E | 87 | 19390  | 19775  | 20863  | -4556 -2158 3344 | C |
| ATOM   | 2721 | CH2 | TRP | E | 87 | 53.362 | 6.364  | 19.328 | 1.00160.29       | C |
| ANISOU | 2721 | CH2 | TRP | E | 87 | 19537  | 20274  | 21091  | -4583 -2164 3566 | C |
| ATOM   | 2722 | CZ2 | TRP | E | 87 | 52.301 | 7.198  | 19.130 | 1.00158.40       | C |
| ANISOU | 2722 | CZ2 | TRP | E | 87 | 19223  | 20186  | 20775  | -4605 -2148 3588 | C |
| ATOM   | 2723 | C   | TRP | E | 87 | 56.253 | 11.367 | 15.721 | 1.00112.25       | C |
| ANISOU | 2723 | C   | TRP | E | 87 | 13842  | 13929  | 14880  | -4288 -1994 2336 | C |
| ATOM   | 2724 | O   | TRP | E | 87 | 56.903 | 11.250 | 16.735 | 1.00109.19       | O |
| ANISOU | 2724 | O   | TRP | E | 87 | 13409  | 13630  | 14448  | -4180 -1969 2372 | O |
| ATOM   | 2725 | N   | GLY | E | 88 | 56.810 | 11.621 | 14.546 | 1.00118.78       | N |
| ANISOU | 2725 | N   | GLY | E | 88 | 14803  | 14554  | 15772  | -4320 -2003 2130 | N |
| ATOM   | 2726 | CA  | GLY | E | 88 | 58.249 | 11.740 | 14.367 | 1.00105.36       | C |
| ANISOU | 2726 | CA  | GLY | E | 88 | 13210  | 12719  | 14105  | -4227 -1984 1935 | C |
| ATOM   | 2727 | C   | GLY | E | 88 | 58.835 | 12.881 | 15.147 | 1.00 93.90       | C |
| ANISOU | 2727 | C   | GLY | E | 88 | 11698  | 11466  | 12516  | -4049 -1916 1819 | C |
| ATOM   | 2728 | O   | GLY | E | 88 | 59.915 | 12.810 | 15.682 | 1.00 99.28       | O |
| ANISOU | 2728 | O   | GLY | E | 88 | 12399  | 12134  | 13188  | -3947 -1898 1764 | O |
| ATOM   | 2729 | N   | ARG | E | 89 | 58.109 | 13.888 | 15.288 | 1.00 95.33       | N |
| ANISOU | 2729 | N   | ARG | E | 89 | 11800  | 11837  | 12584  | -4013 -1878 1802 | N |
| ATOM   | 2730 | CA  | ARG | E | 89 | 58.478 | 15.114 | 15.915 | 1.00100.21       | C |

|        |      |     |     |   |    |        |        |        |       |        |      |   |
|--------|------|-----|-----|---|----|--------|--------|--------|-------|--------|------|---|
| ANISOU | 2730 | CA  | ARG | E | 89 | 12367  | 12651  | 13056  | -3858 | -1807  | 1686 | C |
| ATOM   | 2731 | CB  | ARG | E | 89 | 57.358 | 16.132 | 15.762 | 1.00  | 98.52  |      | C |
| ANISOU | 2731 | CB  | ARG | E | 89 | 12077  | 12611  | 12744  | -3862 | -1768  | 1687 | C |
| ATOM   | 2732 | CG  | ARG | E | 89 | 57.104 | 16.566 | 14.329 | 1.00  | 94.71  |      | C |
| ANISOU | 2732 | CG  | ARG | E | 89 | 11683  | 11981  | 12321  | -3946 | -1786  | 1531 | C |
| ATOM   | 2733 | CD  | ARG | E | 89 | 56.278 | 17.842 | 14.282 | 1.00  | 98.84  |      | C |
| ANISOU | 2733 | CD  | ARG | E | 89 | 12131  | 12698  | 12724  | -3903 | -1726  | 1487 | C |
| ATOM   | 2734 | NE  | ARG | E | 89 | 55.951 | 18.257 | 12.918 | 1.00  | 101.48 |      | N |
| ANISOU | 2734 | NE  | ARG | E | 89 | 12540  | 12903  | 13116  | -3992 | -1745  | 1352 | N |
| ATOM   | 2735 | CZ  | ARG | E | 89 | 54.966 | 19.087 | 12.602 | 1.00  | 104.76 |      | C |
| ANISOU | 2735 | CZ  | ARG | E | 89 | 12892  | 13441  | 13470  | -4011 | -1713  | 1359 | C |
| ATOM   | 2736 | NH1 | ARG | E | 89 | 54.165 | 19.551 | 13.548 | 1.00  | 114.98 |      | N |
| ANISOU | 2736 | NH1 | ARG | E | 89 | 14050  | 14989  | 14651  | -3950 | -1658  | 1504 | N |
| ATOM   | 2737 | NH2 | ARG | E | 89 | 54.798 | 19.463 | 11.350 | 1.00  | 97.14  |      | N |
| ANISOU | 2737 | NH2 | ARG | E | 89 | 12002  | 12348  | 12560  | -4088 | -1733  | 1222 | N |
| ATOM   | 2738 | C   | ARG | E | 89 | 58.707 | 14.827 | 17.358 | 1.00  | 98.73  |      | C |
| ANISOU | 2738 | C   | ARG | E | 89 | 12083  | 12634  | 12795  | -3769 | -1786  | 1834 | C |
| ATOM   | 2739 | O   | ARG | E | 89 | 59.600 | 15.370 | 17.970 | 1.00  | 86.20  |      | O |
| ANISOU | 2739 | O   | ARG | E | 89 | 10497  | 11127  | 11128  | -3641 | -1746  | 1736 | O |
| ATOM   | 2740 | N   | CYS | E | 90 | 58.013 | 13.840 | 17.877 | 1.00  | 104.31 |      | N |
| ANISOU | 2740 | N   | CYS | E | 90 | 12719  | 13371  | 13544  | -3845 | -1822  | 2071 | N |
| ATOM   | 2741 | CA  | CYS | E | 90 | 58.214 | 13.495 | 19.290 | 1.00  | 94.71  |      | C |
| ANISOU | 2741 | CA  | CYS | E | 90 | 11407  | 12316  | 12261  | -3766 | -1805  | 2225 | C |
| ATOM   | 2742 | CB  | CYS | E | 90 | 57.231 | 12.437 | 19.801 | 1.00  | 90.79  |      | C |
| ANISOU | 2742 | CB  | CYS | E | 90 | 10822  | 11864  | 11808  | -3863 | -1846  | 2501 | C |
| ATOM   | 2743 | SG  | CYS | E | 90 | 55.585 | 13.064 | 20.213 | 1.00  | 104.99 |      | S |
| ANISOU | 2743 | SG  | CYS | E | 90 | 12476  | 13918  | 13495  | -3885 | -1812  | 2660 | S |
| ATOM   | 2744 | C   | CYS | E | 90 | 59.635 | 13.008 | 19.464 | 1.00  | 89.12  |      | C |
| ANISOU | 2744 | C   | CYS | E | 90 | 10775  | 11475  | 11611  | -3707 | -1817  | 2146 | C |
| ATOM   | 2745 | O   | CYS | E | 90 | 60.338 | 13.495 | 20.350 | 1.00  | 97.45  |      | O |
| ANISOU | 2745 | O   | CYS | E | 90 | 11797  | 12663  | 12568  | -3582 | -1777  | 2107 | O |
| ATOM   | 2746 | N   | VAL | E | 91 | 60.045 | 12.042 | 18.636 | 1.00  | 79.83  |      | N |
| ANISOU | 2746 | N   | VAL | E | 91 | 9703   | 10038  | 10591  | -3799 | -1871  | 2130 | N |
| ATOM   | 2747 | CA  | VAL | E | 91 | 61.416 | 11.525 | 18.665 | 1.00  | 82.46  |      | C |
| ANISOU | 2747 | CA  | VAL | E | 91 | 10117  | 10214  | 10999  | -3748 | -1880  | 2056 | C |
| ATOM   | 2748 | CB  | VAL | E | 91 | 61.712 | 10.579 | 17.485 | 1.00  | 87.48  |      | C |
| ANISOU | 2748 | CB  | VAL | E | 91 | 10888  | 10537  | 11811  | -3865 | -1928  | 2016 | C |
| ATOM   | 2749 | CG1 | VAL | E | 91 | 63.154 | 10.088 | 17.527 | 1.00  | 81.74  |      | C |
| ANISOU | 2749 | CG1 | VAL | E | 91 | 10243  | 9651   | 11163  | -3800 | -1927  | 1942 | C |
| ATOM   | 2750 | CG2 | VAL | E | 91 | 60.753 | 9.407  | 17.498 | 1.00  | 90.73  |      | C |
| ANISOU | 2750 | CG2 | VAL | E | 91 | 11270  | 10897  | 12306  | -4004 | -1978  | 2244 | C |
| ATOM   | 2751 | C   | VAL | E | 91 | 62.405 | 12.691 | 18.648 | 1.00  | 87.57  |      | C |
| ANISOU | 2751 | C   | VAL | E | 91 | 10804  | 10909  | 11558  | -3614 | -1831  | 1826 | C |
| ATOM   | 2752 | O   | VAL | E | 91 | 63.400 | 12.691 | 19.390 | 1.00  | 86.81  |      | O |
| ANISOU | 2752 | O   | VAL | E | 91 | 10697  | 10856  | 11429  | -3514 | -1815  | 1810 | O |
| ATOM   | 2753 | N   | ALA | E | 92 | 62.095 | 13.702 | 17.835 | 1.00  | 91.55  |      | N |
| ANISOU | 2753 | N   | ALA | E | 92 | 11347  | 11418  | 12018  | -3615 | -1809  | 1658 | N |
| ATOM   | 2754 | CA  | ALA | E | 92 | 62.938 | 14.888 | 17.723 | 1.00  | 92.38  |      | C |
| ANISOU | 2754 | CA  | ALA | E | 92 | 11495  | 11570  | 12035  | -3495 | -1763  | 1429 | C |
| ATOM   | 2755 | CB  | ALA | E | 92 | 62.345 | 15.858 | 16.702 | 1.00  | 80.71  |      | C |
| ANISOU | 2755 | CB  | ALA | E | 92 | 10056  | 10081  | 10528  | -3526 | -1745  | 1272 | C |
| ATOM   | 2756 | C   | ALA | E | 92 | 63.113 | 15.573 | 19.083 | 1.00  | 86.73  |      | C |
| ANISOU | 2756 | C   | ALA | E | 92 | 10676  | 11124  | 11152  | -3367 | -1712  | 1472 | C |
| ATOM   | 2757 | O   | ALA | E | 92 | 64.238 | 15.852 | 19.497 | 1.00  | 79.07  |      | O |
| ANISOU | 2757 | O   | ALA | E | 92 | 9732   | 10167  | 10143  | -3267 | -1695  | 1379 | O |
| ATOM   | 2758 | N   | VAL | E | 93 | 62.000 | 15.833 | 19.767 | 1.00  | 85.91  |      | N |
| ANISOU | 2758 | N   | VAL | E | 93 | 10460  | 11232  | 10951  | -3374 | -1688  | 1618 | N |
| ATOM   | 2759 | CA  | VAL | E | 93 | 62.027 | 16.494 | 21.062 | 1.00  | 76.49  |      | C |
| ANISOU | 2759 | CA  | VAL | E | 93 | 9173   | 10299  | 9590   | -3262 | -1633  | 1670 | C |
| ATOM   | 2760 | CB  | VAL | E | 93 | 60.634 | 16.625 | 21.686 | 1.00  | 77.52  |      | C |
| ANISOU | 2760 | CB  | VAL | E | 93 | 9183   | 10634  | 9638   | -3290 | -1607  | 1856 | C |
| ATOM   | 2761 | CG1 | VAL | E | 93 | 60.725 | 17.484 | 22.927 | 1.00  | 82.13  |      | C |
| ANISOU | 2761 | CG1 | VAL | E | 93 | 9692   | 11477  | 10035  | -3168 | -1538  | 1872 | C |

|        |      |     |     |   |    |        |        |        |       |       |      |   |
|--------|------|-----|-----|---|----|--------|--------|--------|-------|-------|------|---|
| ATOM   | 2762 | CG2 | VAL | E | 93 | 59.680 | 17.268 | 20.729 | 1.00  | 89.09 | C    |   |
| ANISOU | 2762 | CG2 | VAL | E | 93 | 10658  | 12091  | 11103  | -3347 | -1592 | 1787 | C |
| ATOM   | 2763 | C   | VAL | E | 93 | 62.890 | 15.706 | 22.020 | 1.00  | 83.52 | C    |   |
| ANISOU | 2763 | C   | VAL | E | 93 | 10041  | 11195  | 10499  | -3220 | -1654 | 1777 | C |
| ATOM   | 2764 | O   | VAL | E | 93 | 63.639 | 16.278 | 22.808 | 1.00  | 92.24 | O    |   |
| ANISOU | 2764 | O   | VAL | E | 93 | 11130  | 12424  | 11492  | -3113 | -1619 | 1723 | O |
| ATOM   | 2765 | N   | VAL | E | 94 | 62.787 | 14.386 | 21.952 | 1.00  | 85.46 | N    |   |
| ANISOU | 2765 | N   | VAL | E | 94 | 10285  | 11303  | 10882  | -3309 | -1711 | 1932 | N |
| ATOM   | 2766 | CA  | VAL | E | 94 | 63.570 | 13.545 | 22.844 | 1.00  | 84.88 | C    |   |
| ANISOU | 2766 | CA  | VAL | E | 94 | 10185  | 11227  | 10840  | -3276 | -1732 | 2050 | C |
| ATOM   | 2767 | CB  | VAL | E | 94 | 63.120 | 12.072 | 22.775 | 1.00  | 83.51 | C    |   |
| ANISOU | 2767 | CB  | VAL | E | 94 | 9996   | 10922  | 10813  | -3390 | -1789 | 2253 | C |
| ATOM   | 2768 | CG1 | VAL | E | 94 | 64.150 | 11.156 | 23.448 | 1.00  | 73.29 | C    |   |
| ANISOU | 2768 | CG1 | VAL | E | 94 | 8699   | 9566   | 9581   | -3356 | -1812 | 2341 | C |
| ATOM   | 2769 | CG2 | VAL | E | 94 | 61.735 | 11.913 | 23.426 | 1.00  | 81.27 | C    |   |
| ANISOU | 2769 | CG2 | VAL | E | 94 | 9592   | 10820  | 10468  | -3439 | -1787 | 2462 | C |
| ATOM   | 2770 | C   | VAL | E | 94 | 65.050 | 13.684 | 22.490 | 1.00  | 86.33 | C    |   |
| ANISOU | 2770 | C   | VAL | E | 94 | 10466  | 11269  | 11066  | -3209 | -1733 | 1872 | C |
| ATOM   | 2771 | O   | VAL | E | 94 | 65.897 | 13.837 | 23.383 | 1.00  | 84.86 | O    |   |
| ANISOU | 2771 | O   | VAL | E | 94 | 10252  | 11181  | 10810  | -3118 | -1718 | 1879 | O |
| ATOM   | 2772 | N   | VAL | E | 95 | 65.347 | 13.678 | 21.190 | 1.00  | 83.71 | N    |   |
| ANISOU | 2772 | N   | VAL | E | 95 | 10249  | 10713  | 10843  | -3254 | -1751 | 1713 | N |
| ATOM   | 2773 | CA  | VAL | E | 95 | 66.720 | 13.853 | 20.700 | 1.00  | 84.56 | C    |   |
| ANISOU | 2773 | CA  | VAL | E | 95 | 10459  | 10669  | 11001  | -3193 | -1750 | 1531 | C |
| ATOM   | 2774 | CB  | VAL | E | 95 | 66.810 | 13.649 | 19.171 | 1.00  | 83.41 | C    |   |
| ANISOU | 2774 | CB  | VAL | E | 95 | 10443  | 10252  | 10998  | -3271 | -1773 | 1388 | C |
| ATOM   | 2775 | CG1 | VAL | E | 95 | 68.196 | 14.008 | 18.639 | 1.00  | 73.51 | C    |   |
| ANISOU | 2775 | CG1 | VAL | E | 95 | 9293   | 8856   | 9782   | -3197 | -1764 | 1182 | C |
| ATOM   | 2776 | CG2 | VAL | E | 95 | 66.458 | 12.217 | 18.821 | 1.00  | 83.83 | C    |   |
| ANISOU | 2776 | CG2 | VAL | E | 95 | 10521  | 10117  | 11214  | -3392 | -1821 | 1548 | C |
| ATOM   | 2777 | C   | VAL | E | 95 | 67.297 | 15.227 | 21.080 | 1.00  | 83.55 | C    |   |
| ANISOU | 2777 | C   | VAL | E | 95 | 10326  | 10707  | 10711  | -3069 | -1701 | 1364 | C |
| ATOM   | 2778 | O   | VAL | E | 95 | 68.453 | 15.325 | 21.504 | 1.00  | 79.66 | O    |   |
| ANISOU | 2778 | O   | VAL | E | 95 | 9852   | 10217  | 10199  | -2987 | -1696 | 1311 | O |
| ATOM   | 2779 | N   | MET | E | 96 | 66.509 | 16.281 | 20.882 | 1.00  | 85.40 | N    |   |
| ANISOU | 2779 | N   | MET | E | 96 | 10542  | 11073  | 10833  | -3059 | -1664 | 1280 | N |
| ATOM   | 2780 | CA  | MET | E | 96 | 66.953 | 17.628 | 21.213 | 1.00  | 83.98 | C    |   |
| ANISOU | 2780 | CA  | MET | E | 96 | 10364  | 11053  | 10490  | -2947 | -1611 | 1119 | C |
| ATOM   | 2781 | CB  | MET | E | 96 | 65.876 | 18.670 | 20.889 | 1.00  | 83.43 | C    |   |
| ANISOU | 2781 | CB  | MET | E | 96 | 10272  | 11110  | 10316  | -2953 | -1566 | 1051 | C |
| ATOM   | 2782 | CG  | MET | E | 96 | 65.446 | 18.748 | 19.425 | 1.00  | 80.76 | C    |   |
| ANISOU | 2782 | CG  | MET | E | 96 | 10014  | 10586  | 10086  | -3035 | -1584 | 926  | C |
| ATOM   | 2783 | SD  | MET | E | 96 | 63.994 | 19.814 | 19.216 | 1.00  | 96.55 | S    |   |
| ANISOU | 2783 | SD  | MET | E | 96 | 11955  | 12760  | 11968  | -3052 | -1531 | 912  | S |
| ATOM   | 2784 | CE  | MET | E | 96 | 63.673 | 19.667 | 17.465 | 1.00  | 96.18 | C    |   |
| ANISOU | 2784 | CE  | MET | E | 96 | 12011  | 12459  | 12076  | -3165 | -1571 | 781  | C |
| ATOM   | 2785 | C   | MET | E | 96 | 67.322 | 17.718 | 22.686 | 1.00  | 86.47 | C    |   |
| ANISOU | 2785 | C   | MET | E | 96 | 10597  | 11581  | 10679  | -2867 | -1589 | 1235 | C |
| ATOM   | 2786 | O   | MET | E | 96 | 68.438 | 18.118 | 23.029 | 1.00  | 85.81 | O    |   |
| ANISOU | 2786 | O   | MET | E | 96 | 10543  | 11521  | 10540  | -2783 | -1580 | 1139 | O |
| ATOM   | 2787 | N   | VAL | E | 97 | 66.404 | 17.310 | 23.557 | 1.00  | 89.66 | N    |   |
| ANISOU | 2787 | N   | VAL | E | 97 | 10896  | 12135  | 11037  | -2897 | -1585 | 1446 | N |
| ATOM   | 2788 | CA  | VAL | E | 97 | 66.646 | 17.401 | 24.995 | 1.00  | 88.69 | C    |   |
| ANISOU | 2788 | CA  | VAL | E | 97 | 10691  | 12223  | 10785  | -2828 | -1563 | 1567 | C |
| ATOM   | 2789 | CB  | VAL | E | 97 | 65.392 | 16.963 | 25.806 | 1.00  | 87.63 | C    |   |
| ANISOU | 2789 | CB  | VAL | E | 97 | 10441  | 12245  | 10610  | -2874 | -1555 | 1803 | C |
| ATOM   | 2790 | CG1 | VAL | E | 97 | 65.760 | 16.648 | 27.245 | 1.00  | 85.02 | C    |   |
| ANISOU | 2790 | CG1 | VAL | E | 97 | 10033  | 12077  | 10195  | -2826 | -1552 | 1960 | C |
| ATOM   | 2791 | CG2 | VAL | E | 97 | 64.314 | 18.052 | 25.761 | 1.00  | 83.51 | C    |   |
| ANISOU | 2791 | CG2 | VAL | E | 97 | 9887   | 11886  | 9955   | -2860 | -1492 | 1760 | C |
| ATOM   | 2792 | C   | VAL | E | 97 | 67.867 | 16.563 | 25.398 | 1.00  | 84.70 | C    |   |
| ANISOU | 2792 | C   | VAL | E | 97 | 10200  | 11623  | 10359  | -2807 | -1605 | 1619 | C |
| ATOM   | 2793 | O   | VAL | E | 97 | 68.666 | 16.991 | 26.232 | 1.00  | 91.09 | O    |   |

|        |      |     |     |   |     |        |        |        |       |        |      |   |
|--------|------|-----|-----|---|-----|--------|--------|--------|-------|--------|------|---|
| ANISOU | 2793 | O   | VAL | E | 97  | 10995  | 12555  | 11061  | -2727 | -1587  | 1600 | O |
| ATOM   | 2794 | N   | ALA | E | 98  | 68.051 | 15.419 | 24.740 | 1.00  | 79.76  |      | N |
| ANISOU | 2794 | N   | ALA | E | 98  | 9612   | 10771  | 9923   | -2880 | -1657  | 1673 | N |
| ATOM   | 2795 | CA  | ALA | E | 98  | 69.182 | 14.541 | 25.031 | 1.00  | 78.88  |      | C |
| ANISOU | 2795 | CA  | ALA | E | 98  | 9516   | 10548  | 9908   | -2863 | -1692  | 1732 | C |
| ATOM   | 2796 | CB  | ALA | E | 98  | 69.113 | 13.286 | 24.184 | 1.00  | 74.25  |      | C |
| ANISOU | 2796 | CB  | ALA | E | 98  | 8978   | 9702   | 9530   | -2958 | -1738  | 1797 | C |
| ATOM   | 2797 | C   | ALA | E | 98  | 70.513 | 15.256 | 24.800 | 1.00  | 82.46  |      | C |
| ANISOU | 2797 | C   | ALA | E | 98  | 10043  | 10958  | 10328  | -2775 | -1680  | 1535 | C |
| ATOM   | 2798 | O   | ALA | E | 98  | 71.436 | 15.126 | 25.593 | 1.00  | 92.37  |      | O |
| ANISOU | 2798 | O   | ALA | E | 98  | 11274  | 12273  | 11551  | -2717 | -1685  | 1582 | O |
| ATOM   | 2799 | N   | GLY | E | 99  | 70.606 | 16.006 | 23.711 | 1.00  | 84.95  |      | N |
| ANISOU | 2799 | N   | GLY | E | 99  | 10450  | 11174  | 10654  | -2769 | -1665  | 1320 | N |
| ATOM   | 2800 | CA  | GLY | E | 99  | 71.806 | 16.762 | 23.397 | 1.00  | 82.88  |      | C |
| ANISOU | 2800 | CA  | GLY | E | 99  | 10263  | 10869  | 10359  | -2688 | -1653  | 1119 | C |
| ATOM   | 2801 | C   | GLY | E | 99  | 71.991 | 17.976 | 24.290 | 1.00  | 80.82  |      | C |
| ANISOU | 2801 | C   | GLY | E | 99  | 9964   | 10862  | 9880   | -2598 | -1610  | 1056 | C |
| ATOM   | 2802 | O   | GLY | E | 99  | 73.085 | 18.213 | 24.805 | 1.00  | 80.28  |      | O |
| ANISOU | 2802 | O   | GLY | E | 99  | 9905   | 10839  | 9761   | -2529 | -1611  | 1021 | O |
| ATOM   | 2803 | N   | ILE | E | 100 | 70.921 | 18.748 | 24.470 | 1.00  | 76.52  |      | N |
| ANISOU | 2803 | N   | ILE | E | 100 | 9382   | 10483  | 9208   | -2602 | -1568  | 1047 | N |
| ATOM   | 2804 | CA  | ILE | E | 100 | 70.969 | 19.949 | 25.302 | 1.00  | 81.28  |      | C |
| ANISOU | 2804 | CA  | ILE | E | 100 | 9959   | 11329  | 9594   | -2521 | -1515  | 987  | C |
| ATOM   | 2805 | CB  | ILE | E | 100 | 69.619 | 20.719 | 25.310 | 1.00  | 90.33  |      | C |
| ANISOU | 2805 | CB  | ILE | E | 100 | 11069  | 12626  | 10627  | -2535 | -1461  | 984  | C |
| ATOM   | 2806 | CG1 | ILE | E | 100 | 69.167 | 21.020 | 23.878 | 1.00  | 82.08  |      | C |
| ANISOU | 2806 | CG1 | ILE | E | 100 | 10095  | 11421  | 9672   | -2577 | -1460  | 827  | C |
| ATOM   | 2807 | CD1 | ILE | E | 100 | 67.801 | 21.671 | 23.782 | 1.00  | 80.52  |      | C |
| ANISOU | 2807 | CD1 | ILE | E | 100 | 9854   | 11350  | 9388   | -2599 | -1410  | 841  | C |
| ATOM   | 2808 | CG2 | ILE | E | 100 | 69.736 | 22.014 | 26.132 | 1.00  | 78.08  |      | C |
| ANISOU | 2808 | CG2 | ILE | E | 100 | 9510   | 11313  | 8845   | -2447 | -1395  | 907  | C |
| ATOM   | 2809 | C   | ILE | E | 100 | 71.403 | 19.576 | 26.732 | 1.00  | 84.63  |      | C |
| ANISOU | 2809 | C   | ILE | E | 100 | 10307  | 11912  | 9938   | -2489 | -1522  | 1161 | C |
| ATOM   | 2810 | O   | ILE | E | 100 | 71.951 | 20.410 | 27.459 | 1.00  | 88.57  |      | O |
| ANISOU | 2810 | O   | ILE | E | 100 | 10806  | 12572  | 10275  | -2418 | -1493  | 1105 | O |
| ATOM   | 2811 | N   | THR | E | 101 | 71.012 | 18.386 | 27.187 | 1.00  | 88.02  |      | N |
| ANISOU | 2811 | N   | THR | E | 101 | 10665  | 12316  | 10461  | -2546 | -1557  | 1381 | N |
| ATOM   | 2812 | CA  | THR | E | 101 | 71.430 | 17.893 | 28.503 | 1.00  | 81.05  |      | C |
| ANISOU | 2812 | CA  | THR | E | 101 | 9706   | 11565  | 9524   | -2525 | -1571  | 1560 | C |
| ATOM   | 2813 | CB  | THR | E | 101 | 70.509 | 16.773 | 28.974 | 1.00  | 79.80  |      | C |
| ANISOU | 2813 | CB  | THR | E | 101 | 9459   | 11421  | 9442   | -2596 | -1594  | 1802 | C |
| ATOM   | 2814 | OG1 | THR | E | 101 | 69.201 | 17.312 | 29.186 | 1.00  | 78.02  |      | O |
| ANISOU | 2814 | OG1 | THR | E | 101 | 9186   | 11348  | 9110   | -2612 | -1549  | 1841 | O |
| ATOM   | 2815 | CG2 | THR | E | 101 | 71.024 | 16.171 | 30.271 | 1.00  | 100.67 |      | C |
| ANISOU | 2815 | CG2 | THR | E | 101 | 12025  | 14178  | 12048  | -2577 | -1614  | 1987 | C |
| ATOM   | 2816 | C   | THR | E | 101 | 72.874 | 17.385 | 28.600 | 1.00  | 78.59  |      | C |
| ANISOU | 2816 | C   | THR | E | 101 | 9423   | 11146  | 9293   | -2494 | -1612  | 1554 | C |
| ATOM   | 2817 | O   | THR | E | 101 | 73.636 | 17.842 | 29.447 | 1.00  | 86.38  |      | O |
| ANISOU | 2817 | O   | THR | E | 101 | 10394  | 12269  | 10157  | -2435 | -1604  | 1552 | O |
| ATOM   | 2818 | N   | SER | E | 102 | 73.247 | 16.452 | 27.726 | 1.00  | 74.24  |      | N |
| ANISOU | 2818 | N   | SER | E | 102 | 8916   | 10348  | 8945   | -2535 | -1652  | 1554 | N |
| ATOM   | 2819 | CA  | SER | E | 102 | 74.590 | 15.865 | 27.759 | 1.00  | 82.35  |      | C |
| ANISOU | 2819 | CA  | SER | E | 102 | 9966   | 11252  | 10071  | -2506 | -1687  | 1566 | C |
| ATOM   | 2820 | CB  | SER | E | 102 | 74.759 | 14.851 | 26.627 | 1.00  | 83.00  |      | C |
| ANISOU | 2820 | CB  | SER | E | 102 | 10112  | 11041  | 10385  | -2561 | -1717  | 1559 | C |
| ATOM   | 2821 | OG  | SER | E | 102 | 73.840 | 13.784 | 26.770 | 1.00  | 91.20  |      | O |
| ANISOU | 2821 | OG  | SER | E | 102 | 11095  | 12041  | 11515  | -2641 | -1736  | 1751 | O |
| ATOM   | 2822 | C   | SER | E | 102 | 75.705 | 16.906 | 27.684 | 1.00  | 84.01  |      | C |
| ANISOU | 2822 | C   | SER | E | 102 | 10237  | 11498  | 10184  | -2425 | -1673  | 1378 | C |
| ATOM   | 2823 | O   | SER | E | 102 | 76.615 | 16.909 | 28.515 | 1.00  | 84.53  |      | O |
| ANISOU | 2823 | O   | SER | E | 102 | 10272  | 11653  | 10192  | -2380 | -1685  | 1435 | O |
| ATOM   | 2824 | N   | PHE | E | 103 | 75.637 | 17.778 | 26.681 | 1.00  | 86.04  |      | N |
| ANISOU | 2824 | N   | PHE | E | 103 | 10579  | 11687  | 10425  | -2409 | -1650  | 1157 | N |

|        |      |     |     |   |     |        |        |        |       |       |      |   |
|--------|------|-----|-----|---|-----|--------|--------|--------|-------|-------|------|---|
| ATOM   | 2825 | CA  | PHE | E | 103 | 76.627 | 18.838 | 26.535 | 1.00  | 84.06 | C    |   |
| ANISOU | 2825 | CA  | PHE | E | 103 | 10392  | 11470  | 10076  | -2334 | -1635 | 964  | C |
| ATOM   | 2826 | CB  | PHE | E | 103 | 76.439 | 19.602 | 25.220 | 1.00  | 80.09 | C    |   |
| ANISOU | 2826 | CB  | PHE | E | 103 | 9988   | 10845  | 9599   | -2331 | -1614 | 726  | C |
| ATOM   | 2827 | CG  | PHE | E | 103 | 76.993 | 18.900 | 24.011 | 1.00  | 74.01 | C    |   |
| ANISOU | 2827 | CG  | PHE | E | 103 | 9297   | 9781   | 9042   | -2356 | -1644 | 654  | C |
| ATOM   | 2828 | CD1 | PHE | E | 103 | 78.350 | 18.945 | 23.732 | 1.00  | 73.65 | C    |   |
| ANISOU | 2828 | CD1 | PHE | E | 103 | 9307   | 9627   | 9051   | -2303 | -1660 | 561  | C |
| ATOM   | 2829 | CE1 | PHE | E | 103 | 78.869 | 18.322 | 22.614 | 1.00  | 75.20 | C    |   |
| ANISOU | 2829 | CE1 | PHE | E | 103 | 9583   | 9547   | 9442   | -2322 | -1679 | 493  | C |
| ATOM   | 2830 | CZ  | PHE | E | 103 | 78.027 | 17.657 | 21.746 | 1.00  | 91.86 | C    |   |
| ANISOU | 2830 | CZ  | PHE | E | 103 | 11726  | 11486  | 11690  | -2403 | -1684 | 511  | C |
| ATOM   | 2831 | CE2 | PHE | E | 103 | 76.663 | 17.615 | 22.002 | 1.00  | 88.64 | C    |   |
| ANISOU | 2831 | CE2 | PHE | E | 103 | 11261  | 11190  | 11228  | -2463 | -1674 | 603  | C |
| ATOM   | 2832 | CD2 | PHE | E | 103 | 76.154 | 18.240 | 23.129 | 1.00  | 83.94 | C    |   |
| ANISOU | 2832 | CD2 | PHE | E | 103 | 10579  | 10871  | 10442  | -2436 | -1653 | 675  | C |
| ATOM   | 2833 | C   | PHE | E | 103 | 76.548 | 19.813 | 27.703 | 1.00  | 79.95 | C    |   |
| ANISOU | 2833 | C   | PHE | E | 103 | 9826   | 11235  | 9317   | -2286 | -1602 | 976  | C |
| ATOM   | 2834 | O   | PHE | E | 103 | 77.547 | 20.432 | 28.076 | 1.00  | 79.12 | O    |   |
| ANISOU | 2834 | O   | PHE | E | 103 | 9744   | 11202  | 9115   | -2227 | -1602 | 899  | O |
| ATOM   | 2835 | N   | GLY | E | 104 | 75.355 | 19.945 | 28.272 | 1.00  | 79.88 | N    |   |
| ANISOU | 2835 | N   | GLY | E | 104 | 9755   | 11384  | 9212   | -2313 | -1572 | 1075 | N |
| ATOM   | 2836 | CA  | GLY | E | 104 | 75.146 | 20.828 | 29.403 | 1.00  | 85.90 | C    |   |
| ANISOU | 2836 | CA  | GLY | E | 104 | 10479  | 12414  | 9746   | -2274 | -1530 | 1100 | C |
| ATOM   | 2837 | C   | GLY | E | 104 | 75.880 | 20.314 | 30.618 | 1.00  | 87.17 | C    |   |
| ANISOU | 2837 | C   | GLY | E | 104 | 10577  | 12680  | 9865   | -2262 | -1559 | 1269 | C |
| ATOM   | 2838 | O   | GLY | E | 104 | 76.473 | 21.072 | 31.384 | 1.00  | 80.80 | O    |   |
| ANISOU | 2838 | O   | GLY | E | 104 | 9776   | 12034  | 8889   | -2216 | -1544 | 1235 | O |
| ATOM   | 2839 | N   | LEU | E | 105 | 75.853 | 19.000 | 30.777 | 1.00  | 88.41 | N    |   |
| ANISOU | 2839 | N   | LEU | E | 105 | 10675  | 12739  | 10178  | -2308 | -1603 | 1455 | N |
| ATOM   | 2840 | CA  | LEU | E | 105 | 76.501 | 18.353 | 31.898 | 1.00  | 80.60 | C    |   |
| ANISOU | 2840 | CA  | LEU | E | 105 | 9615   | 11833  | 9175   | -2305 | -1636 | 1639 | C |
| ATOM   | 2841 | CB  | LEU | E | 105 | 75.972 | 16.919 | 32.034 | 1.00  | 77.67 | C    |   |
| ANISOU | 2841 | CB  | LEU | E | 105 | 9172   | 11371  | 8969   | -2368 | -1670 | 1857 | C |
| ATOM   | 2842 | CG  | LEU | E | 105 | 76.335 | 16.046 | 33.234 | 1.00  | 98.77 | C    |   |
| ANISOU | 2842 | CG  | LEU | E | 105 | 11751  | 14133  | 11646  | -2379 | -1702 | 2091 | C |
| ATOM   | 2843 | CD1 | LEU | E | 105 | 75.188 | 15.114 | 33.589 | 1.00  | 98.24 | C    |   |
| ANISOU | 2843 | CD1 | LEU | E | 105 | 11602  | 14082  | 11642  | -2442 | -1708 | 2291 | C |
| ATOM   | 2844 | CD2 | LEU | E | 105 | 77.579 | 15.271 | 32.940 | 1.00  | 95.20 | C    |   |
| ANISOU | 2844 | CD2 | LEU | E | 105 | 11313  | 13506  | 11353  | -2368 | -1747 | 2116 | C |
| ATOM   | 2845 | C   | LEU | E | 105 | 78.026 | 18.394 | 31.716 | 1.00  | 84.79 | C    |   |
| ANISOU | 2845 | C   | LEU | E | 105 | 10193  | 12275  | 9750   | -2261 | -1668 | 1560 | C |
| ATOM   | 2846 | O   | LEU | E | 105 | 78.756 | 18.592 | 32.679 | 1.00  | 96.83 | O    |   |
| ANISOU | 2846 | O   | LEU | E | 105 | 11686  | 13939  | 11165  | -2234 | -1680 | 1624 | O |
| ATOM   | 2847 | N   | VAL | E | 106 | 78.504 | 18.214 | 30.485 | 1.00  | 81.35 | N    |   |
| ANISOU | 2847 | N   | VAL | E | 106 | 9831   | 11607  | 9471   | -2257 | -1683 | 1427 | N |
| ATOM   | 2848 | CA  | VAL | E | 106 | 79.943 | 18.280 | 30.205 | 1.00  | 79.83 | C    |   |
| ANISOU | 2848 | CA  | VAL | E | 106 | 9685   | 11315  | 9330   | -2211 | -1710 | 1345 | C |
| ATOM   | 2849 | CB  | VAL | E | 106 | 80.284 | 18.029 | 28.717 | 1.00  | 84.18 | C    |   |
| ANISOU | 2849 | CB  | VAL | E | 106 | 10327  | 11587  | 10071  | -2212 | -1717 | 1195 | C |
| ATOM   | 2850 | CG1 | VAL | E | 106 | 81.765 | 18.308 | 28.452 | 1.00  | 67.83 | C    |   |
| ANISOU | 2850 | CG1 | VAL | E | 106 | 8307   | 9438   | 8027   | -2154 | -1736 | 1092 | C |
| ATOM   | 2851 | CG2 | VAL | E | 106 | 79.937 | 16.603 | 28.309 | 1.00  | 86.01 | C    |   |
| ANISOU | 2851 | CG2 | VAL | E | 106 | 10535  | 11622  | 10521  | -2271 | -1740 | 1342 | C |
| ATOM   | 2852 | C   | VAL | E | 106 | 80.437 | 19.664 | 30.595 | 1.00  | 81.61 | C    |   |
| ANISOU | 2852 | C   | VAL | E | 106 | 9950   | 11718  | 9340   | -2155 | -1686 | 1197 | C |
| ATOM   | 2853 | O   | VAL | E | 106 | 81.554 | 19.831 | 31.081 | 1.00  | 82.32 | O    |   |
| ANISOU | 2853 | O   | VAL | E | 106 | 10038  | 11858  | 9382   | -2121 | -1709 | 1206 | O |
| ATOM   | 2854 | N   | THR | E | 107 | 79.590 | 20.664 | 30.378 | 1.00  | 80.70 | N    |   |
| ANISOU | 2854 | N   | THR | E | 107 | 9871   | 11699  | 9093   | -2149 | -1638 | 1065 | N |
| ATOM   | 2855 | CA  | THR | E | 107 | 79.913 | 22.029 | 30.766 | 1.00  | 81.94 | C    |   |
| ANISOU | 2855 | CA  | THR | E | 107 | 10072  | 12033  | 9028   | -2100 | -1605 | 923  | C |
| ATOM   | 2856 | CB  | THR | E | 107 | 78.889 | 23.033 | 30.238 | 1.00  | 88.77 | C    |   |

|        |      |     |     |   |     |        |        |        |       |        |      |   |
|--------|------|-----|-----|---|-----|--------|--------|--------|-------|--------|------|---|
| ANISOU | 2856 | CB  | THR | E | 107 | 10986  | 12951  | 9793   | -2094 | -1545  | 763  | C |
| ATOM   | 2857 | OG1 | THR | E | 107 | 79.095 | 23.215 | 28.830 | 1.00  | 88.81  |      | O |
| ANISOU | 2857 | OG1 | THR | E | 107 | 11072  | 12747  | 9923   | -2084 | -1549  | 571  | O |
| ATOM   | 2858 | CG2 | THR | E | 107 | 79.040 | 24.371 | 30.960 | 1.00  | 79.11  |      | C |
| ANISOU | 2858 | CG2 | THR | E | 107 | 9794   | 11955  | 8309   | -2050 | -1499  | 668  | C |
| ATOM   | 2859 | C   | THR | E | 107 | 79.981 | 22.127 | 32.276 | 1.00  | 86.52  |      | C |
| ANISOU | 2859 | C   | THR | E | 107 | 10583  | 12853  | 9436   | -2101 | -1603  | 1083 | C |
| ATOM   | 2860 | O   | THR | E | 107 | 80.864 | 22.786 | 32.826 | 1.00  | 91.17  |      | O |
| ANISOU | 2860 | O   | THR | E | 107 | 11195  | 13555  | 9888   | -2068 | -1608  | 1038 | O |
| ATOM   | 2861 | N   | ALA | E | 108 | 79.056 | 21.448 | 32.943 | 1.00  | 88.86  |      | N |
| ANISOU | 2861 | N   | ALA | E | 108 | 10798  | 13225  | 9741   | -2144 | -1598  | 1275 | N |
| ATOM   | 2862 | CA  | ALA | E | 108 | 79.014 | 21.458 | 34.399 | 1.00  | 93.80  |      | C |
| ANISOU | 2862 | CA  | ALA | E | 108 | 11355  | 14075  | 10208  | -2152 | -1594  | 1443 | C |
| ATOM   | 2863 | CB  | ALA | E | 108 | 77.806 | 20.669 | 34.902 | 1.00  | 98.53  |      | C |
| ANISOU | 2863 | CB  | ALA | E | 108 | 11867  | 14725  | 10845  | -2201 | -1584  | 1639 | C |
| ATOM   | 2864 | C   | ALA | E | 108 | 80.304 | 20.878 | 34.977 | 1.00  | 95.36  |      | C |
| ANISOU | 2864 | C   | ALA | E | 108 | 11519  | 14263  | 10449  | -2148 | -1653  | 1553 | C |
| ATOM   | 2865 | O   | ALA | E | 108 | 80.926 | 21.473 | 35.856 | 1.00  | 97.83  |      | O |
| ANISOU | 2865 | O   | ALA | E | 108 | 11835  | 14744  | 10592  | -2131 | -1655  | 1564 | O |
| ATOM   | 2866 | N   | ALA | E | 109 | 80.733 | 19.762 | 34.425 | 1.00  | 90.52  |      | N |
| ANISOU | 2866 | N   | ALA | E | 109 | 10883  | 13448  | 10062  | -2163 | -1699  | 1625 | N |
| ATOM   | 2867 | CA  | ALA | E | 109 | 81.933 | 19.132 | 34.911 | 1.00  | 97.05  |      | C |
| ANISOU | 2867 | CA  | ALA | E | 109 | 11671  | 14251  | 10952  | -2157 | -1752  | 1743 | C |
| ATOM   | 2868 | CB  | ALA | E | 109 | 82.223 | 17.889 | 34.105 | 1.00  | 91.37  |      | C |
| ANISOU | 2868 | CB  | ALA | E | 109 | 10939  | 13277  | 10502  | -2171 | -1786  | 1808 | C |
| ATOM   | 2869 | C   | ALA | E | 109 | 83.075 | 20.101 | 34.781 | 1.00  | 98.72  |      | C |
| ANISOU | 2869 | C   | ALA | E | 109 | 11952  | 14494  | 11062  | -2109 | -1758  | 1583 | C |
| ATOM   | 2870 | O   | ALA | E | 109 | 83.879 | 20.223 | 35.681 | 1.00  | 105.63 |      | O |
| ANISOU | 2870 | O   | ALA | E | 109 | 12798  | 15498  | 11839  | -2104 | -1784  | 1665 | O |
| ATOM   | 2871 | N   | LEU | E | 110 | 83.184 | 20.749 | 33.633 | 1.00  | 101.22 |      | N |
| ANISOU | 2871 | N   | LEU | E | 110 | 12361  | 14686  | 11412  | -2078 | -1739  | 1358 | N |
| ATOM   | 2872 | CA  | LEU | E | 110 | 84.258 | 21.695 | 33.437 | 1.00  | 101.78 |      | C |
| ANISOU | 2872 | CA  | LEU | E | 110 | 12502  | 14779  | 11389  | -2032 | -1746  | 1195 | C |
| ATOM   | 2873 | CB  | LEU | E | 110 | 84.220 | 22.312 | 32.049 | 1.00  | 98.34  |      | C |
| ANISOU | 2873 | CB  | LEU | E | 110 | 12167  | 14184  | 11016  | -2001 | -1722  | 946  | C |
| ATOM   | 2874 | CG  | LEU | E | 110 | 84.872 | 21.544 | 30.910 | 1.00  | 87.48  |      | C |
| ANISOU | 2874 | CG  | LEU | E | 110 | 10821  | 12529  | 9888   | -1989 | -1752  | 905  | C |
| ATOM   | 2875 | CD1 | LEU | E | 110 | 85.074 | 22.466 | 29.732 | 1.00  | 85.74  |      | C |
| ANISOU | 2875 | CD1 | LEU | E | 110 | 10709  | 12202  | 9667   | -1951 | -1730  | 637  | C |
| ATOM   | 2876 | CD2 | LEU | E | 110 | 86.211 | 21.009 | 31.351 | 1.00  | 99.09  |      | C |
| ANISOU | 2876 | CD2 | LEU | E | 110 | 12255  | 13975  | 11422  | -1972 | -1801  | 1020 | C |
| ATOM   | 2877 | C   | LEU | E | 110 | 84.140 | 22.766 | 34.479 | 1.00  | 97.93  |      | C |
| ANISOU | 2877 | C   | LEU | E | 110 | 12024  | 14560  | 10627  | -2028 | -1718  | 1178 | C |
| ATOM   | 2878 | O   | LEU | E | 110 | 85.130 | 23.230 | 34.983 | 1.00  | 99.79  |      | O |
| ANISOU | 2878 | O   | LEU | E | 110 | 12273  | 14886  | 10756  | -2011 | -1742  | 1166 | O |
| ATOM   | 2879 | N   | ALA | E | 111 | 82.926 | 23.149 | 34.833 | 1.00  | 97.28  |      | N |
| ANISOU | 2879 | N   | ALA | E | 111 | 11932  | 14603  | 10425  | -2046 | -1667  | 1185 | N |
| ATOM   | 2880 | CA  | ALA | E | 111 | 82.758 | 24.186 | 35.830 | 1.00  | 101.09 |      | C |
| ANISOU | 2880 | CA  | ALA | E | 111 | 12434  | 15336  | 10639  | -2042 | -1628  | 1168 | C |
| ATOM   | 2881 | CB  | ALA | E | 111 | 81.294 | 24.530 | 35.994 | 1.00  | 99.30  |      | C |
| ANISOU | 2881 | CB  | ALA | E | 111 | 12201  | 15208  | 10321  | -2055 | -1560  | 1170 | C |
| ATOM   | 2882 | C   | ALA | E | 111 | 83.326 | 23.723 | 37.142 | 1.00  | 110.96 |      | C |
| ANISOU | 2882 | C   | ALA | E | 111 | 13612  | 16728  | 11817  | -2070 | -1668  | 1377 | C |
| ATOM   | 2883 | O   | ALA | E | 111 | 84.017 | 24.454 | 37.815 | 1.00  | 112.74 |      | O |
| ANISOU | 2883 | O   | ALA | E | 111 | 13870  | 17102  | 11865  | -2064 | -1673  | 1352 | O |
| ATOM   | 2884 | N   | THR | E | 112 | 83.035 | 22.492 | 37.512 | 1.00  | 111.78 |      | N |
| ANISOU | 2884 | N   | THR | E | 112 | 13621  | 16791  | 12060  | -2105 | -1699  | 1589 | N |
| ATOM   | 2885 | CA  | THR | E | 112 | 83.544 | 21.955 | 38.756 | 1.00  | 108.03 |      | C |
| ANISOU | 2885 | CA  | THR | E | 112 | 13068  | 16445  | 11533  | -2136 | -1739  | 1804 | C |
| ATOM   | 2886 | CB  | THR | E | 112 | 82.798 | 20.689 | 39.176 | 1.00  | 111.98 |      | C |
| ANISOU | 2886 | CB  | THR | E | 112 | 13463  | 16920  | 12164  | -2177 | -1753  | 2030 | C |
| ATOM   | 2887 | OG1 | THR | E | 112 | 81.422 | 21.021 | 39.367 | 1.00  | 121.68 |      | O |
| ANISOU | 2887 | OG1 | THR | E | 112 | 14691  | 18246  | 13297  | -2190 | -1693  | 2026 | O |

|        |      |     |     |   |     |        |        |        |                  |   |
|--------|------|-----|-----|---|-----|--------|--------|--------|------------------|---|
| ATOM   | 2888 | CG2 | THR | E | 112 | 83.361 | 20.111 | 40.457 | 1.00121.71       | C |
| ANISOU | 2888 | CG2 | THR | E | 112 | 14612  | 18285  | 13349  | -2209 -1798 2255 | C |
| ATOM   | 2889 | C   | THR | E | 112 | 85.059 | 21.809 | 38.796 | 1.00109.84       | C |
| ANISOU | 2889 | C   | THR | E | 112 | 13299  | 16629  | 11808  | -2123 -1801 1819 | C |
| ATOM   | 2890 | O   | THR | E | 112 | 85.663 | 22.070 | 39.800 | 1.00120.17       | O |
| ANISOU | 2890 | O   | THR | E | 112 | 14588  | 18100  | 12970  | -2140 -1823 1903 | O |
| ATOM   | 2891 | N   | TRP | E | 113 | 85.684 | 21.418 | 37.698 | 1.00114.90       | N |
| ANISOU | 2891 | N   | TRP | E | 113 | 13963  | 17047  | 12646  | -2094 -1827 1737 | N |
| ATOM   | 2892 | CA  | TRP | E | 113 | 87.131 | 21.251 | 37.680 | 1.00110.29       | C |
| ANISOU | 2892 | CA  | TRP | E | 113 | 13376  | 16408  | 12121  | -2077 -1882 1759 | C |
| ATOM   | 2893 | CB  | TRP | E | 113 | 87.547 | 20.792 | 36.294 | 1.00119.83       | C |
| ANISOU | 2893 | CB  | TRP | E | 113 | 14621  | 17342  | 13567  | -2042 -1892 1653 | C |
| ATOM   | 2894 | CG  | TRP | E | 113 | 89.005 | 20.697 | 35.999 | 1.00119.43       | C |
| ANISOU | 2894 | CG  | TRP | E | 113 | 14581  | 17197  | 13600  | -2010 -1937 1639 | C |
| ATOM   | 2895 | CD1 | TRP | E | 113 | 89.979 | 20.206 | 36.799 | 1.00114.91       | C |
| ANISOU | 2895 | CD1 | TRP | E | 113 | 13937  | 16685  | 13037  | -2022 -1987 1818 | C |
| ATOM   | 2896 | NE1 | TRP | E | 113 | 91.180 | 20.241 | 36.153 | 1.00110.10       | N |
| ANISOU | 2896 | NE1 | TRP | E | 113 | 13359  | 15945  | 12529  | -1981 -2015 1750 | N |
| ATOM   | 2897 | CE2 | TRP | E | 113 | 90.988 | 20.744 | 34.899 | 1.00119.71       | C |
| ANISOU | 2897 | CE2 | TRP | E | 113 | 14673  | 17007  | 13806  | -1943 -1983 1519 | C |
| ATOM   | 2898 | CD2 | TRP | E | 113 | 89.632 | 21.026 | 34.764 | 1.00125.59       | C |
| ANISOU | 2898 | CD2 | TRP | E | 113 | 15443  | 17791  | 14486  | -1963 -1935 1446 | C |
| ATOM   | 2899 | CE3 | TRP | E | 113 | 89.172 | 21.553 | 33.560 | 1.00117.48       | C |
| ANISOU | 2899 | CE3 | TRP | E | 113 | 14508  | 16629  | 13502  | -1935 -1898 1219 | C |
| ATOM   | 2900 | CZ3 | TRP | E | 113 | 90.058 | 21.771 | 32.561 | 1.00109.58       | C |
| ANISOU | 2900 | CZ3 | TRP | E | 113 | 13572  | 15460  | 12602  | -1890 -1908 1071 | C |
| ATOM   | 2901 | CH2 | TRP | E | 113 | 91.401 | 21.481 | 32.723 | 1.00121.02       | C |
| ANISOU | 2901 | CH2 | TRP | E | 113 | 14996  | 16872  | 14115  | -1868 -1953 1147 | C |
| ATOM   | 2902 | CZ2 | TRP | E | 113 | 91.887 | 20.966 | 33.887 | 1.00124.07       | C |
| ANISOU | 2902 | CZ2 | TRP | E | 113 | 15289  | 17390  | 14463  | -1895 -1991 1374 | C |
| ATOM   | 2903 | C   | TRP | E | 113 | 87.790 | 22.562 | 37.985 | 1.00110.10       | C |
| ANISOU | 2903 | C   | TRP | E | 113 | 13426  | 16535  | 11873  | -2060 -1878 1619 | C |
| ATOM   | 2904 | O   | TRP | E | 113 | 88.695 | 22.621 | 38.777 | 1.00115.32       | O |
| ANISOU | 2904 | O   | TRP | E | 113 | 14059  | 17306  | 12450  | -2074 -1919 1715 | O |
| ATOM   | 2905 | N   | PHE | E | 114 | 87.322 | 23.632 | 37.375 | 1.00115.01       | N |
| ANISOU | 2905 | N   | PHE | E | 114 | 14142  | 17167  | 12389  | -2033 -1827 1396 | N |
| ATOM   | 2906 | CA  | PHE | E | 114 | 87.874 | 24.929 | 37.658 | 1.00117.88       | C |
| ANISOU | 2906 | CA  | PHE | E | 114 | 14586  | 17677  | 12526  | -2019 -1816 1254 | C |
| ATOM   | 2907 | CB  | PHE | E | 114 | 87.304 | 25.972 | 36.713 | 1.00116.64       | C |
| ANISOU | 2907 | CB  | PHE | E | 114 | 14533  | 17478  | 12307  | -1981 -1756 995  | C |
| ATOM   | 2908 | CG  | PHE | E | 114 | 87.768 | 25.803 | 35.312 | 1.00111.74       | C |
| ANISOU | 2908 | CG  | PHE | E | 114 | 13955  | 16614  | 11888  | -1940 -1772 846  | C |
| ATOM   | 2909 | CD1 | PHE | E | 114 | 88.991 | 25.255 | 35.061 | 1.00117.49       | C |
| ANISOU | 2909 | CD1 | PHE | E | 114 | 14662  | 17224  | 12755  | -1925 -1832 893  | C |
| ATOM   | 2910 | CE1 | PHE | E | 114 | 89.440 | 25.082 | 33.781 | 1.00113.33       | C |
| ANISOU | 2910 | CE1 | PHE | E | 114 | 14179  | 16466  | 12414  | -1886 -1841 760  | C |
| ATOM   | 2911 | CZ  | PHE | E | 114 | 88.657 | 25.465 | 32.733 | 1.00112.52       | C |
| ANISOU | 2911 | CZ  | PHE | E | 114 | 14142  | 16252  | 12358  | -1866 -1795 575  | C |
| ATOM   | 2912 | CE2 | PHE | E | 114 | 87.428 | 26.018 | 32.976 | 1.00112.13       | C |
| ANISOU | 2912 | CE2 | PHE | E | 114 | 14108  | 16325  | 12171  | -1882 -1738 531  | C |
| ATOM   | 2913 | CD2 | PHE | E | 114 | 86.990 | 26.182 | 34.263 | 1.00111.93       | C |
| ANISOU | 2913 | CD2 | PHE | E | 114 | 14039  | 16528  | 11962  | -1916 -1724 667  | C |
| ATOM   | 2914 | C   | PHE | E | 114 | 87.603 | 25.289 | 39.106 | 1.00115.84       | C |
| ANISOU | 2914 | C   | PHE | E | 114 | 14302  | 17679  | 12031  | -2062 -1804 1382 | C |
| ATOM   | 2915 | O   | PHE | E | 114 | 88.459 | 25.824 | 39.775 | 1.00121.70       | O |
| ANISOU | 2915 | O   | PHE | E | 114 | 15067  | 18553  | 12621  | -2076 -1832 1394 | O |
| ATOM   | 2916 | N   | VAL | E | 115 | 86.398 | 25.016 | 39.585 | 1.00115.84       | N |
| ANISOU | 2916 | N   | VAL | E | 115 | 14262  | 17754  | 11997  | -2088 -1763 1476 | N |
| ATOM   | 2917 | CA  | VAL | E | 115 | 86.071 | 25.310 | 40.966 | 1.00123.55       | C |
| ANISOU | 2917 | CA  | VAL | E | 115 | 15217  | 18971  | 12755  | -2130 -1745 1604 | C |
| ATOM   | 2918 | CB  | VAL | E | 115 | 84.568 | 25.247 | 41.250 | 1.00118.61       | C |
| ANISOU | 2918 | CB  | VAL | E | 115 | 14569  | 18414  | 12084  | -2143 -1678 1652 | C |
| ATOM   | 2919 | CG1 | VAL | E | 115 | 84.310 | 25.442 | 42.729 | 1.00119.95       | C |



|        |      |     |     |   |     |        |        |        |            |       |      |   |
|--------|------|-----|-----|---|-----|--------|--------|--------|------------|-------|------|---|
| ANISOU | 2919 | CG1 | VAL | E | 115 | 14714  | 18822  | 12038  | -2189      | -1661 | 1804 | C |
| ATOM   | 2920 | CG2 | VAL | E | 115 | 83.846 | 26.316 | 40.459 | 1.00112.44 |       |      | C |
| ANISOU | 2920 | CG2 | VAL | E | 115 | 13885  | 17617  | 11220  | -2104      | -1601 | 1419 | C |
| ATOM   | 2921 | C   | VAL | E | 115 | 86.869 | 24.456 | 41.939 | 1.00127.22 |       |      | C |
| ANISOU | 2921 | C   | VAL | E | 115 | 15590  | 19497  | 13250  | -2173      | -1816 | 1840 | C |
| ATOM   | 2922 | O   | VAL | E | 115 | 87.235 | 24.911 | 42.998 | 1.00127.26 |       |      | O |
| ANISOU | 2922 | O   | VAL | E | 115 | 15604  | 19693  | 13057  | -2208      | -1825 | 1908 | O |
| ATOM   | 2923 | N   | GLY | E | 116 | 87.088 | 23.199 | 41.591 | 1.00125.18 |       |      | N |
| ANISOU | 2923 | N   | GLY | E | 116 | 15245  | 19076  | 13240  | -2173      | -1863 | 1970 | N |
| ATOM   | 2924 | CA  | GLY | E | 116 | 87.816 | 22.263 | 42.428 | 1.00124.02 |       |      | C |
| ANISOU | 2924 | CA  | GLY | E | 116 | 15000  | 18966  | 13156  | -2209      | -1929 | 2207 | C |
| ATOM   | 2925 | C   | GLY | E | 116 | 89.267 | 22.577 | 42.694 | 1.00137.05 |       |      | C |
| ANISOU | 2925 | C   | GLY | E | 116 | 16662  | 20659  | 14751  | -2212      | -1986 | 2213 | C |
| ATOM   | 2926 | O   | GLY | E | 116 | 89.726 | 22.425 | 43.811 | 1.00157.15 |       |      | O |
| ANISOU | 2926 | O   | GLY | E | 116 | 19158  | 23359  | 17194  | -2258      | -2024 | 2381 | O |
| ATOM   | 2927 | N   | ARG | E | 117 | 90.007 | 22.990 | 41.677 | 1.00131.48 |       |      | N |
| ANISOU | 2927 | N   | ARG | E | 117 | 16022  | 19817  | 14117  | -2166      | -1997 | 2040 | N |
| ATOM   | 2928 | CA  | ARG | E | 117 | 91.399 | 23.349 | 41.892 | 1.00138.83 |       |      | C |
| ANISOU | 2928 | CA  | ARG | E | 117 | 16968  | 20792  | 14991  | -2168      | -2052 | 2042 | C |
| ATOM   | 2929 | C   | ARG | E | 117 | 91.537 | 24.793 | 42.387 | 1.00142.09 |       |      | C |
| ANISOU | 2929 | C   | ARG | E | 117 | 17480  | 21402  | 15103  | -2183      | -2030 | 1904 | C |
| ATOM   | 2930 | O   | ARG | E | 117 | 92.582 | 25.207 | 42.842 | 1.00152.44 |       |      | O |
| ANISOU | 2930 | O   | ARG | E | 117 | 18806  | 22807  | 16307  | -2204      | -2076 | 1926 | O |
| ATOM   | 2931 | CB  | ARG | E | 117 | 92.220 | 23.131 | 40.637 | 1.00140.53 |       |      | C |
| ANISOU | 2931 | CB  | ARG | E | 117 | 17205  | 20775  | 15414  | -2111      | -2075 | 1932 | C |
| ATOM   | 2932 | CG  | ARG | E | 117 | 93.697 | 23.322 | 40.875 | 1.00149.78 |       |      | C |
| ANISOU | 2932 | CG  | ARG | E | 117 | 18371  | 21981  | 16559  | -2113      | -2138 | 1972 | C |
| ATOM   | 2933 | CD  | ARG | E | 117 | 94.524 | 22.965 | 39.659 | 1.00156.48 |       |      | C |
| ANISOU | 2933 | CD  | ARG | E | 117 | 19231  | 22588  | 17637  | -2054      | -2157 | 1890 | C |
| ATOM   | 2934 | NE  | ARG | E | 117 | 95.918 | 22.784 | 40.031 | 1.00172.08 |       |      | N |
| ANISOU | 2934 | NE  | ARG | E | 117 | 21160  | 24588  | 19633  | -2060      | -2224 | 2010 | N |
| ATOM   | 2935 | CZ  | ARG | E | 117 | 96.881 | 22.476 | 39.176 | 1.00179.47 |       |      | C |
| ANISOU | 2935 | CZ  | ARG | E | 117 | 22096  | 25342  | 20753  | -2012      | -2248 | 1979 | C |
| ATOM   | 2936 | NH1 | ARG | E | 117 | 96.602 | 22.318 | 37.891 | 1.00171.54 |       |      | N |
| ANISOU | 2936 | NH1 | ARG | E | 117 | 21143  | 24111  | 19923  | -1955      | -2211 | 1823 | N |
| ATOM   | 2937 | NH2 | ARG | E | 117 | 98.124 | 22.323 | 39.610 | 1.00183.31 |       |      | N |
| ANISOU | 2937 | NH2 | ARG | E | 117 | 22531  | 25871  | 21246  | -2021      | -2308 | 2109 | N |
| ATOM   | 2938 | N   | GLU | E | 118 | 90.480 | 25.575 | 42.265 | 1.00140.69 |       |      | N |
| ANISOU | 2938 | N   | GLU | E | 118 | 17377  | 21287  | 14792  | -2174      | -1957 | 1760 | N |
| ATOM   | 2939 | CA  | GLU | E | 118 | 90.486 | 26.943 | 42.734 | 1.00142.18 |       |      | C |
| ANISOU | 2939 | CA  | GLU | E | 118 | 17672  | 21660  | 14692  | -2188      | -1921 | 1627 | C |
| ATOM   | 2940 | CB  | GLU | E | 118 | 89.242 | 27.691 | 42.272 | 1.00138.52 |       |      | C |
| ANISOU | 2940 | CB  | GLU | E | 118 | 17285  | 21203  | 14142  | -2159      | -1828 | 1450 | C |
| ATOM   | 2941 | CG  | GLU | E | 118 | 89.170 | 29.132 | 42.740 | 1.00138.99 |       |      | C |
| ANISOU | 2941 | CG  | GLU | E | 118 | 17464  | 21448  | 13899  | -2170      | -1776 | 1307 | C |
| ATOM   | 2942 | CD  | GLU | E | 118 | 90.332 | 29.952 | 42.250 | 1.00144.35 |       |      | C |
| ANISOU | 2942 | CD  | GLU | E | 118 | 18226  | 22104  | 14516  | -2149      | -1808 | 1144 | C |
| ATOM   | 2943 | OE1 | GLU | E | 118 | 91.213 | 29.398 | 41.573 | 1.00138.16 |       |      | O |
| ANISOU | 2943 | OE1 | GLU | E | 118 | 17404  | 21165  | 13927  | -2125      | -1872 | 1148 | O |
| ATOM   | 2944 | OE2 | GLU | E | 118 | 90.361 | 31.152 | 42.546 | 1.00153.13 |       |      | O |
| ANISOU | 2944 | OE2 | GLU | E | 118 | 19446  | 23354  | 15385  | -2157      | -1767 | 1013 | O |
| ATOM   | 2945 | C   | GLU | E | 118 | 90.596 | 27.005 | 44.243 | 1.00155.54 |       |      | C |
| ANISOU | 2945 | C   | GLU | E | 118 | 19334  | 23584  | 16180  | -2260      | -1939 | 1809 | C |
| ATOM   | 2946 | O   | GLU | E | 118 | 91.188 | 27.930 | 44.774 | 1.00163.54 |       |      | O |
| ANISOU | 2946 | O   | GLU | E | 118 | 20420  | 24744  | 16974  | -2288      | -1946 | 1756 | O |
| ATOM   | 2947 | N   | GLN | E | 119 | 90.024 | 26.018 | 44.924 | 1.00159.21 |       |      | N |
| ANISOU | 2947 | N   | GLN | E | 119 | 19697  | 24080  | 16718  | -2294      | -1946 | 2023 | N |
| ATOM   | 2948 | CA  | GLN | E | 119 | 90.064 | 25.968 | 46.381 | 1.00156.72 |       |      | C |
| ANISOU | 2948 | CA  | GLN | E | 119 | 19346  | 23979  | 16223  | -2366      | -1964 | 2212 | C |
| ATOM   | 2949 | CB  | GLN | E | 119 | 89.177 | 24.837 | 46.903 | 1.00151.41 |       |      | C |
| ANISOU | 2949 | CB  | GLN | E | 119 | 18561  | 23305  | 15663  | -2389      | -1958 | 2420 | C |
| ATOM   | 2950 | CG  | GLN | E | 119 | 87.713 | 24.966 | 46.516 | 1.00152.62 |       |      | C |
| ANISOU | 2950 | CG  | GLN | E | 119 | 18738  | 23428  | 15824  | -2359      | -1872 | 2336 | C |

|        |      |     |     |       |     |        |        |        |                  |   |
|--------|------|-----|-----|-------|-----|--------|--------|--------|------------------|---|
| ATOM   | 2951 | CD  | GLN | E     | 119 | 87.083 | 26.244 | 47.035 | 1.00153.82       | C |
| ANISOU | 2951 | CD  | GLN | E     | 119 | 18999  | 23761  | 15686  | -2370 -1792 2218 | C |
| ATOM   | 2952 | OE1 | GLN | E     | 119 | 87.740 | 27.049 | 47.696 | 1.00144.03       | O |
| ANISOU | 2952 | OE1 | GLN | E     | 119 | 17826  | 22669  | 14229  | -2405 -1801 2193 | O |
| ATOM   | 2953 | NE2 | GLN | E     | 119 | 85.804 | 26.437 | 46.737 | 1.00160.29       | N |
| ANISOU | 2953 | NE2 | GLN | E     | 119 | 19838  | 24567  | 16497  | -2343 -1711 2149 | N |
| ATOM   | 2954 | C   | GLN | E     | 119 | 91.491 | 25.792 | 46.888 | 1.00162.94       | C |
| ANISOU | 2954 | C   | GLN | E     | 119 | 20098  | 24817  | 16996  | -2405 -2053 2329 | C |
| ATOM   | 2955 | O   | GLN | E     | 119 | 91.817 | 26.193 | 48.005 | 1.00168.06       | O |
| ANISOU | 2955 | O   | GLN | E     | 119 | 20762  | 25662  | 17432  | -2471 -2072 2421 | O |
| ATOM   | 2956 | N   | GLU | E     | 120 | 92.338 | 25.189 | 46.059 | 1.00164.44       | N |
| ANISOU | 2956 | N   | GLU | E     | 120 | 20242  | 24826  | 17412  | -2367 -2107 2331 | N |
| ATOM   | 2957 | CA  | GLU | E     | 120 | 93.731 | 24.959 | 46.422 | 1.00160.43       | C |
| ANISOU | 2957 | CA  | GLU | E     | 120 | 19690  | 24345  | 16923  | -2396 -2193 2450 | C |
| ATOM   | 2958 | CB  | GLU | E     | 120 | 94.436 | 24.132 | 45.344 | 1.00159.71       | C |
| ANISOU | 2958 | CB  | GLU | E     | 120 | 19541  | 24012  | 17130  | -2338 -2231 2453 | C |
| ATOM   | 2959 | C   | GLU | E     | 120 | 94.469 | 26.276 | 46.638 | 1.00164.34       | C |
| ANISOU | 2959 | C   | GLU | E     | 120 | 20297  | 24974  | 17169  | -2419 -2202 2312 | C |
| ATOM   | 2960 | O   | GLU | E     | 120 | 95.272 | 26.405 | 47.562 | 1.00173.94       | O |
| ANISOU | 2960 | O   | GLU | E     | 120 | 21496  | 26339  | 18253  | -2484 -2259 2441 | O |
| ATOM   | 2961 | N   | ARG | E     | 121 | 94.172 | 27.249 | 45.790 | 1.00169.49       | N |
| ANISOU | 2961 | N   | ARG | E     | 121 | 21066  | 25575  | 17757  | -2370 -2147 2055 | N |
| ATOM   | 2962 | CA  | ARG | E     | 121 | 94.787 | 28.567 | 45.842 | 1.00173.10       | C |
| ANISOU | 2962 | CA  | ARG | E     | 121 | 21645  | 26141  | 17982  | -2383 -2146 1891 | C |
| ATOM   | 2963 | CB  | ARG | E     | 121 | 94.282 | 29.410 | 44.655 | 1.00172.06       | C |
| ANISOU | 2963 | CB  | ARG | E     | 121 | 21623  | 25898  | 17853  | -2310 -2076 1603 | C |
| ATOM   | 2964 | CG  | ARG | E     | 121 | 95.209 | 30.510 | 44.163 | 1.00169.62       | C |
| ANISOU | 2964 | CG  | ARG | E     | 121 | 21422  | 25596  | 17428  | -2293 -2093 1409 | C |
| ATOM   | 2965 | CD  | ARG | E     | 121 | 94.473 | 31.481 | 43.256 | 1.00160.51       | C |
| ANISOU | 2965 | CD  | ARG | E     | 121 | 20383  | 24351  | 16252  | -2217 -1989 1123 | C |
| ATOM   | 2966 | NE  | ARG | E     | 121 | 93.512 | 32.288 | 44.001 | 1.00166.26       | N |
| ANISOU | 2966 | NE  | ARG | E     | 121 | 21179  | 25151  | 16841  | -2198 -1857 1055 | N |
| ATOM   | 2967 | CZ  | ARG | E     | 121 | 92.729 | 33.222 | 43.470 | 1.00166.32       | C |
| ANISOU | 2967 | CZ  | ARG | E     | 121 | 21282  | 25089  | 16824  | -2124 -1741 832  | C |
| ATOM   | 2968 | NH1 | ARG | E     | 121 | 92.774 | 33.484 | 42.172 | 1.00163.93       | N |
| ANISOU | 2968 | NH1 | ARG | E     | 121 | 21021  | 24642  | 16621  | -2063 -1738 644  | N |
| ATOM   | 2969 | NH2 | ARG | E     | 121 | 91.890 | 33.890 | 44.243 | 1.00162.38       | N |
| ANISOU | 2969 | NH2 | ARG | E     | 121 | 20834  | 24657  | 16207  | -2109 -1629 804  | N |
| ATOM   | 2970 | C   | ARG | E     | 121 | 94.450 | 29.263 | 47.157 | 1.00173.49       | C |
| ANISOU | 2970 | C   | ARG | E     | 121 | 21749  | 26424  | 17747  | -2453 -2110 1941 | C |
| ATOM   | 2971 | O   | ARG | E     | 121 | 95.293 | 29.903 | 47.768 | 1.00179.03       | O |
| ANISOU | 2971 | O   | ARG | E     | 121 | 22491  | 27150  | 18381  | -2459 -2088 1909 | O |
| ATOM   | 2972 | N   | ARG | E     | 122 | 93.207 | 29.133 | 47.587 | 1.00172.35       | N |
| ANISOU | 2972 | N   | ARG | E     | 122 | 21598  | 26350  | 17536  | -2467 -2049 1983 | N |
| ATOM   | 2973 | CA  | ARG | E     | 122 | 92.734 | 29.747 | 48.821 | 1.00171.85       | C |
| ANISOU | 2973 | CA  | ARG | E     | 122 | 21580  | 26394  | 17320  | -2486 -1949 1990 | C |
| ATOM   | 2974 | CB  | ARG | E     | 122 | 91.437 | 30.521 | 48.572 | 1.00176.03       | C |
| ANISOU | 2974 | CB  | ARG | E     | 122 | 22200  | 26914  | 17770  | -2434 -1821 1811 | C |
| ATOM   | 2975 | C   | ARG | E     | 122 | 92.519 | 28.701 | 49.911 | 1.00168.60       | C |
| ANISOU | 2975 | C   | ARG | E     | 122 | 21052  | 26101  | 16907  | -2563 -2001 2281 | C |
| ATOM   | 2976 | O   | ARG | E     | 122 | 93.390 | 27.869 | 50.166 | 1.00164.88       | O |
| ANISOU | 2976 | O   | ARG | E     | 122 | 20483  | 25644  | 16521  | -2608 -2107 2472 | O |
| TER    |      |     |     |       |     |        |        |        |                  |   |
| HETATM | 2977 | O   | HOH | E1001 |     | 68.021 | 19.935 | 9.746  | 1.00 90.00       | O |
| HETATM | 2978 | O   | HOH | E1002 |     | 73.746 | 24.014 | 27.142 | 1.00 67.41       | O |
| HETATM | 2979 | O   | HOH | E1003 |     | 74.003 | 24.104 | 22.914 | 1.00 65.57       | O |
| TER    |      |     |     |       |     |        |        |        |                  |   |
| HETATM | 2980 | K   | K   | A     | 1   | 67.945 | 26.564 | 9.372  | 0.50 85.90       | K |
| HETATM | 2981 | K   | K   | A     | 2   | 69.184 | 26.541 | 12.538 | 0.50 85.90       | K |
| HETATM | 2982 | K   | K   | A     | 3   | 70.343 | 26.530 | 15.531 | 0.50 85.90       | K |
| HETATM | 2983 | K   | K   | A     | 4   | 71.572 | 26.515 | 18.640 | 0.50 85.90       | K |
| HETATM | 2984 | K   | K   | A     | 5   | 74.349 | 26.623 | 24.987 | 1.00 97.49       | K |
| HETATM | 2985 | K   | K   | A     | 6   | 65.872 | 26.493 | 4.377  | 1.00106.03       | K |

TER  
END
